# Supplementary material for: A DSG1 Frameshift Variant in a Rottweiler Dog with Footpad Hyperkeratosis
Source: MDPI journal article supplement (doi:10.3390/genes11040469), 2020-04-24
Supplement: s1 [file s1]

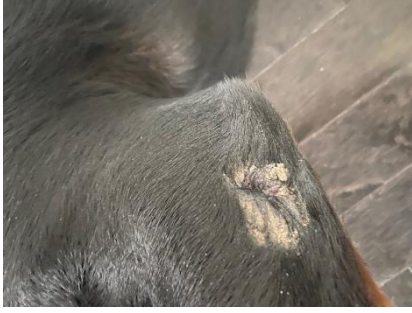

**Figure S1.** Hyperkeratotic plaque and crusting at the elbow of the affected dog, which was associated with bacterial infection of the skin in the affected dog.
