# Supplementary material for: A DSG1 Frameshift Variant in a Rottweiler Dog with Footpad Hyperkeratosis
Source: Genes (Basel). 2020 Apr 24;11(4):469. doi: 10.3390/genes11040469 (PMC7230267; doi:10.3390/genes11040469)
Supplement: Supplementary file 1 [file genes-11-00469-s001.zip › TableS1_public_genomes.xlsx]

## Sheet: Sheet1
Table S1. Accession numbers of 648 dog and 8 wolf genome sequences. The affected dog is highlighted in red. The other 655 genome sequences were used as controls in variant filtering.
Sample ID	Breed	Study accession	Sample accession	Remark
12559RE	Cane corso	PRJEB30571	SAMEA5205212
12675RE	Border Collie	PRJEB30571	SAMEA5205221
2M2	Beagle (research colony)	PRJEB16012	SAMEA5204132
3M2	Beagle (research colony)	PRJEB16012	SAMEA5204133
6455RE	Greater Swiss Mountain Dog	PRJEB16012 / PRJEB30571	SAMEA104658568 / SAMEA5205217
6958RE	Border Collie	PRJEB30571	SAMEA5205222
6F4	Beagle (research colony)	PRJEB16012	SAMEA5204134
7F1	Beagle (research colony)	PRJEB16012	SAMEA5204135
AC023	Australian Cattle Dog	PRJEB16012	SAMEA104091560
AC0258	Australian Cattle Dog	PRJEB16012	SAMEA5657396
AC046	Australian Cattle Dog	PRJEB16012	SAMEA104283464
AC065	Australian Cattle dog	PRJEB13468	SAMEA3928139
AC108	Australian Cattle dog	PRJEB16012	SAMEA4504820
AC364	Australian Cattle Dog	PRJEB16012	SAMEA104500413
AD009	Alpine Dachsbracke	PRJEB14840	SAMEA4346711
AD034	Alpine Dachsbracke	PRJEB16012	SAMEA4848713
AM007	Alaskan Malamute	PRJEB16012	SAMEA104091571
AM019	Alaskan Malamute	PRJEB16012	SAMEA4848707
AR001	Australian Terrier	PRJEB16012	SAMEA4504840
AS006	American Staffordshire Terrier	PRJEB16012	SAMEA4504831
AS008	American Staffordshire Terrier	PRJEB16012	SAMEA4867927
AS011	American Staffordshire Terrier	PRJEB16012	SAMEA6249480
AU178	Australian Shepherd	PRJEB16012	SAMEA104283461
AU184	Australian Shepherd	PRJEB16012	SAMEA4867934
BB011	White Shepherd	PRJEB16012	SAMEA4506887
BC0480	Border Collie	PRJEB16012	SAMEA104091558
BC1028	Border Collie	PRJNA319610	SRR3466766
BC1029	Border Collie	PRJNA319610	SRR3466767
BC1893	Bearded Collie	PRJEB28877	SAMEA4949388
BC1895	Bearded Collie	PRJEB28877	SAMEA4949389
BC1896	Bearded Collie	PRJEB28877	SAMEA4949390
BC222	Border Collie	PRJNA319610	SRR3466763
BC272	Border Collie	PRJEB4544 / PRJNA188158	SAMEA2177732 / SAMN01908107
BC273	Border Collie	PRJEB16012	SAMEA4505490
BC387	Border Collie	PRJNA319610	SRR3466764
BC485	Border Collie	PRJEB16012	SAMEA104125112
BC518	Border Collie	PRJEB16012	SAMEA104125113
BC547	Border Collie	PRJEB30571	SAMEA5205229
BC548	Border Collie	PRJEB30571	SAMEA5205228
BC549	Border Collie	PRJEB30571	SAMEA5205227
BC555	Border Collie	PRJEB16012	SAMEA104125114
BC578	Border Collie	PRJNA319610	SRR3466765
BC597	Border Collie	PRJEB16012	SAMEA104125115
BC604__BC_24093	Border Collie	PRJEB12337	ERR1210832
BC621	Border Collie	PRJEB16012	SAMEA4867922
BC655	Border Collie	PRJEB16012	SAMEA5657397
BD016	Bearded Collie	PRJEB13468	SAMEA3928140
BD036	Bearded Collie	PRJEB16012	SAMEA4505492
BD052	Bearded Collie	PRJEB16012	SAMEA4504824
BD085	Bearded Collie	PRJEB16012	SAMEA4505493
BD089	Bearded Collie	PRJEB16012	SAMEA4504827
BD091	Bearded Collie	PRJEB16012	SAMEA4505496
BD093	Bearded Collie	PRJEB16012	SAMEA4504832
BD098	Bearded Collie	PRJEB16012	SAMEA4504839
BE020	Beagle	PRJEB5500	SAMEA2376414
BF21	Bichon Frisé	PRJEB16012	SAMEA5059512
BF39	Bichon Frisé	PRJEB16012	SAMEA5059513
BG064	Bavarian Hound (Bayerischer Gebirgsschweisshund)	PRJEB16012	SAMEA104091562
BH003	Basset Hound	PRJEB16012	SAMEA4509488
BH005_SEA04046	Basset Hound	PRJEB16012	SAMEA5209170
BI005_HCS01268	Brussels Griffon	PRJEB16012	SAMEA5209171
BI006_HCS01271	Brussels Griffon	PRJEB16012	SAMEA5209172
BJ001	Basenji	PRJEB16012	SAMEA104283473
BJ002	Basenji	PRJEB16012	SAMEA104283472
BJ003	Basenji	PRJEB16012	SAMEA104283471
BJ004	Basenji	PRJEB16012	SAMEA104283470
BJ005	Basenji	PRJEB16012	SAMEA104283469
BJ006	Basenji	PRJEB16012	SAMEA104283468
BS2168	Bernese Mountain Dog	PRJEB16012	SAMEA6249477
BT007	Miniature Bull terrier	PRJEB16012	SAMEA4506897
BT012	Bull Terrier	PRJEB16012	SAMEA104125116
BT134	Bull Terrier	PRJEB16012	SAMEA6249481
BU002	Bullmastiff	PRJEB16012	SAMEA103949042
BX002	Dogue de Bordeaux	PRJEB30571	SAMEA5205223
BX003	Dogue de Bordeaux	PRJEB30571	SAMEA5205224
BY010	Berger des Pyrénées	PRJEB16012	SAMEA6249482
BY014	Berger des Pyrénées	PRJEB16012	SAMEA6249483
BY015	Berger des Pyrénées	PRJEB16012	SAMEA6249484
CE073	Cairn Terrier	PRJEB16012	SAMEA104091555
CH019	Chihuahua (without pedigree)	PRJEB13139	SAMEA3905753
CH022_LCR05127	Chihuahua Smooth Coat	PRJEB16012	SAMEA5209173
CH023_LCR05128	Chihuahua Smooth Coat	PRJEB16012	SAMEA5209174
CH027	Chihuahua	PRJEB16012	SAMEA4848714
CH030	Chihuahua	PRJEB16012	SAMEA6249485
CI001	Cane corso	PRJEB30571	SAMEA5205213
CI002	Cane corso	PRJEB30571	SAMEA5205214
CI003	Cane corso	PRJEB30571	SAMEA5205215
CI004	Cane corso	PRJEB30571	SAMEA5205216
CI005	Cane Corso	PRJEB16012	SAMEA6249478
CK006	Cavalier King Charles Spaniel	PRJEB16012	SAMEA104091570
CK023	Cavalier King Charles Spaniel	PRJEB16012	SAMEA104091569
CL013	Collie	PRJEB16012	SAMEA4867926
CP003	Cocker Spaniel	PRJEB16012	SAMEA4506900
CP010_SEA04160	English Cocker Spaniel	PRJEB16012	SAMEA5209204
CR018	Curly Coated Retriever	PRJEB16012	SAMEA4867931
CR023	Curly Coated Retriever	PRJEB16012	SAMEA4867930
CR039	Curly Coated Retriever	PRJEB16012	SAMEA104091556
CR040	Curly Coated Retriever	PRJEB16012	SAMEA4848709
CR101	Curly Coated Retriever	PRJEB16012	SAMEA4848710
CW011	Chow Chow	PRJEB16012	SAMEA104091566
DAL162K1	Dalmatian dog	PRJNA360671	SRR5161902
DD116	Great Dane	PRJEB16012	SAMEA104091557
DH0117	Dachshund	PRJEB16012	SAMEA104091567
DH098	Dachshund	PRJEB7736	SAMEA3121338
DH126	Dachshund	PRJEB16012	SAMEA104125117
DH136_SEA04054	Dachshund (Miniature Longhaired)	PRJEB16012	SAMEA5209175
DH137_SEA04056	Dachshund (Miniature Longhaired)	PRJEB16012	SAMEA5209176
DK008	German Shorthaired Pointer	PRJEB16012	SAMEA5657398
DK398	German Shorthaired Pointer	PRJEB16012	SAMEA6249504
DO159	Doberman Pinscher	PRJEB16012	SAMEA4509491
DO242	Doberman Pinscher	PRJEB16012	SAMEA4505489
DO263	Doberman Pinscher	PRJEB16012	SAMEA4509492
DO665	Doberman Pinscher	PRJEB16012	SAMEA6249486
DQ1	Chinese Indigenous Dog	PRJNA266585
DQ10	Chinese Indigenous Dog	PRJNA266585
DQ2	Chinese Indigenous Dog	PRJNA266585
DQ3	Chinese Indigenous Dog	PRJNA266585
DQ4	Chinese Indigenous Dog	PRJNA266585
DQ5	Chinese Indigenous Dog	PRJNA266585
DQ6	Chinese Indigenous Dog	PRJNA266585
DQ7	Chinese Indigenous Dog	PRJNA266585
DQ8	Chinese Indigenous Dog	PRJNA266585
DQ9	Chinese Indigenous Dog	PRJNA266585
DS032	Mixed breed	PRJEB14110	SAMEA3994036
DS041	Mixed breed	PRJEB14110	SAMEA3994037
DS042	Mixed breed	PRJEB14110	SAMEA3994038
DS043	German Shepherd	PRJEB16012	SAMEA4506895
DS051	German Shepherd	PRJEB16012	SAMEA72802168
DS053	German Shepherd	PRJEB16012	SAMEA72802918
DS064	German Shepherd	PRJEB16012	SAMEA104283465
DS077	German Shepherd	PRJEB16012	SAMEA5657392
EB003	English Bulldog	PRJEB16012	SAMEA4848708
EL565	Elo	PRJEB16012	SAMEA4506890
EM003	Mastiff	PRJEB16012	SAMEA6249487
EN091	Entlebucher Sennenhund	PRJEB16012	SAMEA4504828
EN154	Entlebucher Sennenhund	PRJEB16012	SAMEA4505497
EN221	Entlebucher Sennenhund	PRJEB16012	SAMEA4504829
EN247	Entlebucher Sennenhund	PRJEB16012	SAMEA4505498
EN261	Entlebucher Sennenhund	PRJEB16012	SAMEA4504830
EN262	Entlebucher Sennenhund	PRJEB16012	SAMEA4505499
EN263	Entlebucher Sennenhund	PRJEB16012	SAMEA4505500
EN264	Entlebucher Sennenhund	PRJEB16012	SAMEA4505501
EU008	Eurasier	PRJEB6079	SAMEA2446720
EU035	Eurasier	PRJEB16012	SAMEA4506889
FB046	French Bulldog	PRJEB13468	SAMEA3928146
FB065	French Bulldog	PRJEB16012	SAMEA4504835
FB081	French Bulldog	PRJEB16012	SAMEA6249479
GP3	Great Pyrenees	PRJEB16012	SAMEA4848700
GR0855	Golden Retriever	PRJEB16012	SAMEA4504838
GR0859	Golden Retriever	PRJEB16012	SAMEA4506899
GR0860	Golden Retriever	PRJEB16012	SAMEA4509487
GR0892	Golden Retriever	PRJEB16012	SAMEA104016307
GR1078	Golden Retriever Mix	PRJEB16012	SAMEA104091572
GR1161	Golden Retriever	PRJEB16012	SAMEA4867924
GR1301	Golden Retriever	PRJEB16012	SAMEA6249503
GS1	German Shepherd	PRJNA266585
GS10	German Shepherd	PRJNA266585
GS104	Spitz (Grossspitz)	PRJEB16012	SAMEA104105252
GS2	German Shepherd	PRJNA266585
GS3	German Shepherd	PRJNA266585
GS4	German Shepherd	PRJNA266585
GS5	German Shepherd	PRJNA266585
GS6	German Shepherd	PRJNA266585
GS7	German Shepherd	PRJNA266585
GS8	German Shepherd	PRJNA266585
GS9	German Shepherd	PRJNA266585
GW004	German Wirehaired	PRJEB13468	SAMEA3928144
GY391	Greyhound	PRJEB16012	SAMEA4867933
GY393	Greyhound	PRJEB16012	SAMEA4848711
GY415	Greyhound	PRJEB16012	SAMEA4867932
GY416	Greyhound	PRJEB16012	SAMEA4848712
GY432	Greyhound	PRJEB16012	SAMEA104125118
HA008_SEA02120	Havanese	PRJEB16012	SAMEA5209177
HA009_SEA02121	Havanese	PRJEB16012	SAMEA5209178
HA010_GER00024	Havanese	PRJEB16012	SAMEA5209179
HT001	Heideterrier	PRJEB16012	SAMEA103135918
HW1706	Hovawart	PRJEB16012	SAMEA4506894
HW1872	Hovawart	PRJEB16012	SAMEA4848705
HW1979	Hovawart	PRJEB16012	SAMEA4867928
IST011	Irish Soft Coated Wheaten Terrier	PRJEB16012	SAMEA6249488
IST012	Irish Soft Coated Wheaten Terrier	PRJEB16012	SAMEA6249489
IST013	Irish Soft Coated Wheaten Terrier	PRJEB16012	SAMEA6249490
IST014	Irish Soft Coated Wheaten Terrier	PRJEB16012	SAMEA6249491
IST015	Irish Soft Coated Wheaten Terrier	PRJEB16012	SAMEA6249492
IST016	Irish Soft Coated Wheaten Terrier	PRJEB16012	SAMEA6249493
IST017	Irish Soft Coated Wheaten Terrier	PRJEB16012	SAMEA6249494
IST018	Irish Soft Coated Wheaten Terrier	PRJEB16012	SAMEA6249495
IST019	Irish Soft Coated Wheaten Terrier	PRJEB16012	SAMEA6258987
IST020	Irish Soft Coated Wheaten Terrier	PRJEB16012	SAMEA6249496
IT0390	Irish Terrier	PRJEB16012	SAMEA104283467
IT221	Irish Terrier	PRJEB13468	SAMEA3928141
JR0034	Jack Russell Terrier	PRJEB16012	SAMEA104125119
JR043_SEA02220	Jack Russell Terrier	PRJEB16012	SAMEA5209180
JR044_SEA02225	Jack Russell Terrier	PRJEB16012	SAMEA5209181
JR045	Jack Russell Terrier	PRJEB16012	SAMEA4867925
JR048	Jack Russel Terrier	PRJEB16012	SAMEA6249497
JR052	Jack Russel Terrier	PRJEB16012	SAMEA6249498
JT007	German Hunting Terrier	PRJEB16012	SAMEA104125120
JT011	German Hunting Terrier	PRJEB16012	SAMEA104283460
KEP033K1	Central Asian Shepherd dog	PRJNA380744	SRR5381785
KF042	Kromfohrländer	PRJEB6076	SAMEA2446055
KKH2684	Siberian Husky	PRJEB10823	SAMEA3539249
KM1	Kunming Dog	PRJNA266585
KM10	Kunming Dog	PRJNA266585
KM2	Kunming Dog	PRJNA266585
KM3	Kunming Dog	PRJNA266585
KM4	Kunming Dog	PRJNA266585
KM5	Kunming Dog	PRJNA266585
KM6	Kunming Dog	PRJNA266585
KM7	Kunming Dog	PRJNA266585
KM8	Kunming Dog	PRJNA266585
KM9	Kunming Dog	PRJNA266585
LA1869	Labrador Retriever	PRJEB16012	SAMEA4504834
LA2382	Mixed Breed (Labrador Retriever cross, Italy)	PRJEB16012	SAMEA104125075
LA2438	Labrador Retriever	PRJEB16012	SAMEA5209182
LA2439__PER00177	Labrador Retriever	PRJEB16012	SAMEA5209183
LA2443	Labrador Retriever	PRJEB16012	SAMEA104091568
LA882	Labrador Retriever	PRJEB5874	SAMEA2417015
LA900	Labrador Retriever	PRJEB5875	SAMEA2417016
LB0013	Leonberger	PRJEB16012	SAMEA4848665
LB0139	Leonberger	PRJEB16012	SAMEA4848666
LB0147	Leonberger	PRJEB16012	SAMEA4848690
LB0197	Leonberger	PRJEB16012	SAMEA4848676
LB0203	Leonberger	PRJEB16012	SAMEA4848667
LB0268	Leonberger	PRJEB16012	SAMEA4848668
LB0304	Leonberger	PRJEB16012	SAMEA4848669
LB0305	Leonberger	PRJEB16012	SAMEA4848670
LB0339	Leonberger	PRJEB16012	SAMEA4848671
LB0418	Leonberger	PRJEB16012	SAMEA4848672
LB0482	Leonberger	PRJEB16012	SAMEA4848673
LB0507	Leonberger	PRJEB16012	SAMEA4848691
LB0554	Leonberger	PRJEB16012	SAMEA4848692
LB0656	Leonberger	PRJEB16012	SAMEA4848693
LB0683	Leonberger	PRJEB16012	SAMEA4848674
LB111	Leonberger	PRJEB16012	SAMEA47266168
LB1848	Leonberger	PRJEB16012	SAMEA104656180
LB1919	Leonberger	PRJEB16012	SAMEA103935360
LB1961	Leonberger	PRJEB16012	SAMEA4848675
LB214	Leonberger	PRJEB16012	SAMEA4867936
LB3506	Leonberger	PRJEB16012	SAMEA4848684
LB3521	Leonberger	PRJEB16012	SAMEA4848694
LB3601	Leonberger	PRJEB16012	SAMEA4848685
LB3659	Leonberger	PRJEB16012	SAMEA4848686
LB3705	Leonberger	PRJEB16012	SAMEA4848687
LB3906	Leonberger	PRJEB16012	SAMEA4848688
LB4183	Leonberger	PRJEB16012	SAMEA4848689
LB4693	Leonberger	PRJEB16012	SAMEA4848695
LB5378	Leonberger	PRJEB16012	SAMEA4873254
LB5751	Leonberger	PRJEB16012	SAMEA4848699
LE0051	Leonberger	PRJEB16012	SAMEA4848677
LE0237	Leonberger	PRJEB16012	SAMEA4848678
LE0269	Leonberger	PRJEB16012	SAMEA4848679
LE0512	Leonberger	PRJEB16012	SAMEA4848680
LE0738	Leonberger	PRJEB16012	SAMEA4848681
LE0896	Leonberger	PRJEB16012	SAMEA4848696
LE1294	Leonberger	PRJEB16012	SAMEA4848682
LE1301	Leonberger	PRJEB16012	SAMEA4848683
LE1302	Leonberger	PRJEB16012	SAMEA4848697
LE1355	Leonberger	PRJEB16012	SAMEA4848698
LE2450	Leonberger	PRJEB16012	SAMEA104656181
LE3212	Leonberger	PRJEB16012	SAMEA5657399
LJ1	Chinese Indigenous Dog	PRJNA266585
LJ10	Chinese Indigenous Dog	PRJNA266585
LJ2	Chinese Indigenous Dog	PRJNA266585
LJ3	Chinese Indigenous Dog	PRJNA266585
LJ4	Chinese Indigenous Dog	PRJNA266585
LJ5	Chinese Indigenous Dog	PRJNA266585
LJ6	Chinese Indigenous Dog	PRJNA266585
LJ7	Chinese Indigenous Dog	PRJNA266585
LJ8	Chinese Indigenous Dog	PRJNA266585
LJ9	Chinese Indigenous Dog	PRJNA266585
LJP027A2	Swedish Vallhund	PRJNA394814	SRR5834681
LJP030A2	Swedish Vallhund	PRJNA394814	SRR5834680
LN048	Landseer	PRJEB9437	SAMEA3402917
LN47	Border Collie	PRJEB16012	SAMEA4504821
LR1030	Lagotto Romagnolo	PRJEB16012	SAMEA4509490
LR1149	Lagotto Romagnolo	PRJEB16012	SAMEA4867929
LR1248	Lagotto Romagnolo	PRJEB16012	SAMEA5657400
LR390	Lagotto Romagnolo	PRJEB13468	SAMEA3928142
LR416	Lagotto Romagnolo	PRJEB16012	SAMEA4867935
LR433	Lagotto Romagnolo	PRJEB16012	SAMEA4505491
LR494	Lagotto Romagnolo	PRJEB16012	SAMEA4505494
LR538	Lagotto Romagnolo	PRJEB16012	SAMEA104283462
LR654	Lagotto Romagnolo	PRJEB16012	SAMEA104283463
LR753	Lagotto Romagnolo	PRJEB16012	SAMEA4504833
MA008	Malinois	PRJEB16012	SAMEA4504823
MA0163	Malinois	PRJEB16012	SAMEA104032048
MA094	Malinois	PRJEB16012	SAMEA4504826
MA142	Malinois	PRJEB16012	SAMEA104125121
MA152	Malinois	PRJEB16012	SAMEA4506898
MA324	Malinois	PRJEB16012	SAMEA104125122
MA437	Malinois	PRJEB16012	SAMEA4848704
MA446	Malinois	PRJEB16012	SAMEA6249499
MA471	Malinois	PRJEB16012	SAMEA6249500
MB003	Miniature Bull terrier	PRJEB16012	SAMEA4867920
MI016	Mixed Breed	PRJEB16012	SAMEA4506893
MI020	Mixed breed	PRJEB16012	SAMEA4867919
MI025	mixed breed	PRJEB16012	SAMEA4867923
MP011_CAN00015	Pug	PRJEB16012	SAMEA5209184
MP012_CAN00016	Pug	PRJEB16012	SAMEA5209185
MP013_CAN00017	Pug	PRJEB16012	SAMEA5209186
MS32	Miniature Schnauzer	PRJEB16012	SAMEA5059499
MS77	Miniature Schnauzer	PRJEB16012	SAMEA5059500
NF187000	Newfoundland	PRJEB16012	SAMEA4848701
NF492	Newfoundland	PRJEB16012	SAMEA104500411
NW062	Norwich Terrier	PRJEB16012	SAMEA104091550
NW152	Norwich Terrier	PRJEB16012	SAMEA104091551
NW206	Norwich Terrier	PRJEB16012	SAMEA104091552
NW255	Norwich Terrier	PRJEB16012	SAMEA104091553
OS001	Old English Sheepdog	PRJEB16012	SAMEA4504841
PA073_AMY00153	Papillon	PRJEB16012	SAMEA5209187
PA074_AMY00157	Papillon	PRJEB16012	SAMEA5209188
PA075_AMY00158	Papillon	PRJEB16012	SAMEA5209189
PE002	Perro de Agua Español	PRJEB7903	SAMEA3164479
PG002__BGVP_17289	Petit Basset Griffon Vendeen	PRJEB11835	SAMEA3723573
PG003_GENEBANK0060	Petit Basset Griffon Vendeen	PRJEB16012	SAMEA5209190
PG004_GENEBANK00143	Petit Basset Griffon Vendeen	PRJEB16012	SAMEA5209191
PG005_GENEBANK00199	Petit Basset Griffon Vendeen	PRJEB16012	SAMEA5209192
PL116	Poodle	PRJEB16012 / PRJEB30571	SAMEA4506891 / SAMEA5205225
PL148__PER_BAN00024	Miniature Poodle	PRJEB16012	SAMEA5209193
PL150__D00105	Poodle	PRJNA503969	SAMN10386546
PL152__D00270	Poodle	PRJNA503969	SAMN10386547
PL153__D00271	Poodle	PRJNA503969	SAMN10386548
PL154__D00285	Poodle	PRJNA503969	SAMN10386549
PL156__D00353	Poodle	PRJNA503969	SAMN10386550
PL157__D00354	Poodle	PRJNA503969	SAMN10386551
PL158__D00373	Poodle	PRJNA503969	SAMN10386552
PL159__D00382	Poodle	PRJNA503969	SAMN10386553
PL160__D00392	Poodle	PRJNA503969	SAMN10386554
PL161__D00397	Poodle	PRJNA503969	SAMN10386555
PL162__D00477	Poodle	PRJNA503969	SAMN10386556
PL163__D00530	Poodle	PRJNA503969	SAMN10386557
PL164__D00817	Poodle	PRJNA503969	SAMN10386558
PL165__D00868	Poodle	PRJNA503969	SAMN10386559
RO015	Rottweiler	PRJEB16012	SAMEA6249501	affected with footpad hyperkeratosis
RO2	Rottweiler	PRJEB7735	SAMEA3121337
ROS.gDNA.SID00115	Pug	PRJEB17926	SAMEA104389202
ROS.gDNA.SID00400	Whippet	PRJEB17926	SAMEA104389243
ROS.gDNA.SID00434	Bichon Frisé	PRJEB17926	SAMEA104388844
ROS.gDNA.SID00436	Pug	PRJEB17926	SAMEA104389203
ROS.gDNA.SID00437	Pug	PRJEB17926	SAMEA104389204
ROS.gDNA.SID00439	Pug	PRJEB17926	SAMEA104389205
ROS.gDNA.SID00464	Bichon Frisé	PRJEB17926	SAMEA104388845
ROS.gDNA.SID00488	Pug	PRJEB17926	SAMEA104389206
ROS.gDNA.SID00539	Bichon Frisé	PRJEB17926	SAMEA104388846
ROS.gDNA.SID00860	Saluki	PRJEB17926	SAMEA104389241
ROS.gDNA.SID01138	Kerry Blue Terrier	PRJEB17926	SAMEA104389201
ROS.gDNA.SID01166	Pug	PRJEB17926	SAMEA104389207
ROS.gDNA.SID01169	Pug	PRJEB17926	SAMEA104389208
ROS.gDNA.SID01170	Pug	PRJEB17926	SAMEA104389209
ROS.gDNA.SID01171	Pug	PRJEB17926	SAMEA104389210
ROS.gDNA.SID01221	Pug	PRJEB17926	SAMEA104389211
ROS.gDNA.SID01232	Bull Terrier	PRJEB17926	SAMEA104388849
ROS.gDNA.SID01237	Pug	PRJEB17926	SAMEA104389212
ROS.gDNA.SID01578	Shih Tzu	PRJEB17926	SAMEA104389242
ROS.gDNA.SID01682	Pug	PRJEB17926	SAMEA104389213
ROS.gDNA.SID01737	Dogue de Bordeaux	PRJEB17926	SAMEA104388851
ROS.gDNA.SID01899	Japanese Chin	PRJEB17926	SAMEA104388850
ROS.gDNA.SID01940	Airedale Terrier	PRJEB17926	SAMEA104388843
ROS.gDNA.SID02492	Pug	PRJEB17926	SAMEA104389237
ROS.gDNA.SID02765	Pug	PRJEB17926	SAMEA104389238
ROS.gDNA.SID02770	Pug	PRJEB17926	SAMEA104389239
ROS.gDNA.SID02832	Pug	PRJEB17926	SAMEA104389240
ROS.gDNA.SID02920	Bichon Frisé	PRJEB17926	SAMEA104388847
ROS.gDNA.SID03009	American Bulldog	PRJEB17926	SAMEA104388842
ROS.gDNA.SID03103	Brussels Griffon	PRJEB17926	SAMEA104388848
RR098	Rhodesian Ridgeback	PRJEB16012	SAMEA104091554
RR123	Rhodesian Ridgeback	PRJEB16012	SAMEA4504822
RR224	Rhodesian Ridgeback	PRJEB16012	SAMEA4505495
RR320	Rhodesian Ridgeback	PRJNA357866	SRR5117439
SG005	Sloughi	PRJEB13468	SAMEA3928143
SG006	Sloughi	PRJEB16012	SAMEA4506885
SG008	Sloughi	PRJEB16012	SAMEA4506888
SH008	Greater Swiss Mountain Dog	PRJEB16012	SAMEA4504837
SH010	Greater Swiss Mountain Dog	PRJEB16012 / PRJEB30571	SAMEA104658569 / SAMEA5205218
SH011	Greater Swiss Mountain Dog	PRJEB16012 / PRJEB30571	SAMEA104658570 / SAMEA5205219
SH012	Greater Swiss Mountain Dog	PRJEB16012 / PRJEB30571	SAMEA104656182 / SAMEA5205220
SH013	Greater Swiss Mountain Dog	PRJEB16012 / PRJEB30571	SAMEA104656183 / SAMEA5205226
SH050	Greater Swiss Mountain Dog	PRJEB16012	SAMEA6249502
SID00101	Cavalier King Charles Spaniel	PRJEB17926	SAMEA104379882
SID00110	American bulldog	PRJEB17926	SAMEA104379885
SID00122	Boxer	PRJEB17926	SAMEA104379880
SID00142	Affenpinscher	PRJEB17926	SAMEA104379879
SID00176	Bullmastiff	PRJEB17926	SAMEA104379881
SID00225	French Bulldog	PRJEB17926	SAMEA104379883
SID00354	Dogue de Bordeaux	PRJEB17926	SAMEA104379884
SL006	Saluki	PRJEB16012	SAMEA4504825
SM010	Standard Schnauzer	PRJEB16012	SAMEA104500412
SRR2094385	Beagle	PRJNA288568	SRR2094385
SRR2094386	Beagle	PRJNA288568	SRR2094386
SRR2094387	Border Collie	PRJNA288568	SRR2094387
SRR2094388	Border Collie	PRJNA288568	SRR2094388
SRR2094389	Border Collie	PRJNA288568	SRR2094389
SRR2094390	Brittany Spaniel	PRJNA288568	SRR2094390
SRR2094392	Chow Chow	PRJNA288568	SRR2094392
SRR2094393	Clumber Spaniel	PRJNA288568	SRR2094393
SRR2094396	English Mastiff	PRJNA288568	SRR2094396
SRR2094398	English Pointer	PRJNA288568	SRR2094398
SRR2094399	Greyhound	PRJNA288568	SRR2094399
SRR2094400	Irish Wolfhound	PRJNA288568	SRR2094400
SRR2094401	Italian Greyhound	PRJNA288568	SRR2094401
SRR2094404	Pug	PRJNA288568	SRR2094404
SRR2094405	Pug	PRJNA288568	SRR2094405
SRR2094406	Pug	PRJNA288568	SRR2094406
SRR2094407	Rhodesian Ridgeback	PRJNA288568	SRR2094407
SRR2094408	Saluki	PRJNA288568	SRR2094408
SRR2094409	Scottish Terrier	PRJNA288568	SRR2094409
SRR2095316	English Cocker Spaniel	PRJNA288568	SRR2095316
SRR2095317	Cavalier King Charles Spaniel	PRJNA288568	SRR2095317
SRR2095318	Doberman Pinscher	PRJNA288568	SRR2095318
SRR2095320	Golden Retriever	PRJNA288568	SRR2095320
SRR2095321	Great Pyrenees	PRJNA288568	SRR2095321
SRR2095322	Italian Greyhound	PRJNA288568	SRR2095322
SRR2095323	Labrador Retriever	PRJNA288568	SRR2095323
SRR2095324	Portuguese Pointer	PRJNA288568	SRR2095324
SRR2095325	Poodle	PRJNA288568	SRR2095325
SRR2095330	West Highland White Terrier	PRJNA288568	SRR2095330
SRR2095362	Wolf	PRJNA288568	SRR2095362
SRR2095368	Belgian Sheepdog	PRJNA288568	SRR2095368
SRR2095457	Belgian Sheepdog	PRJNA288568	SRR2095457
SRR2095463	Bernese Mountain Dog	PRJNA288568	SRR2095463
SRR2095469	Bloodhound	PRJNA288568	SRR2095469
SRR2095477	Bulldog	PRJNA288568	SRR2095477
SRR2095478	Chihuahua	PRJNA288568	SRR2095478
SRR2095479	English Cocker Spaniel	PRJNA288568	SRR2095479
SRR2095480	Flat Coated Retriever	PRJNA288568	SRR2095480
SRR2095487	Flat Coated Retriever	PRJNA288568	SRR2095487
SRR2095497	Great Dane	PRJNA288568	SRR2095497
SRR2095500	Pekingese	PRJNA288568	SRR2095500
SRR2095501	Rottweiler	PRJNA288568	SRR2095501
SRR2095502	St. Bernard	PRJNA288568	SRR2095502
SRR2095503	Saluki	PRJNA288568	SRR2095503
SRR2095504	Shetland Sheepdog	PRJNA288568	SRR2095504
SRR2095539	Siberian Husky	PRJNA288568	SRR2095539
SRR2095540	Poodle	PRJNA288568	SRR2095540
SRR2827577	Chinese Indigenous Dog	PRJNA266585	SRR2827577
SRR2827578	Chinese Indigenous Dog	PRJNA266585	SRR2827578
SRR2827579	Chinese Indigenous Dog	PRJNA266585	SRR2827579
SRR2827580	Chinese Indigenous Dog	PRJNA266585	SRR2827580
SRR2827581	Chinese Indigenous Dog	PRJNA266585	SRR2827581
SRR2827582	Chinese Indigenous Dog	PRJNA266585	SRR2827582
SRR2827583	Chinese Indigenous Dog	PRJNA266585	SRR2827583
SRR2827584	Chinese Indigenous Dog	PRJNA266585	SRR2827584
SRR2827585	Chinese Indigenous Dog	PRJNA266585	SRR2827585
SRR2827586	Chinese Indigenous Dog	PRJNA266585	SRR2827586
SRR2827587	Chinese Indigenous Dog	PRJNA266585	SRR2827587
SRR2827588	Chinese Indigenous Dog	PRJNA266585	SRR2827588
SRR2827589	Chinese Indigenous Dog	PRJNA266585	SRR2827589
SRR2827590	Chinese Indigenous Dog	PRJNA266585	SRR2827590
SRR2827591	Nigerian Indigenous Dog	PRJNA266585	SRR2827591
SRR2827592	Nigerian Indigenous Dog	PRJNA266585	SRR2827592
SRR2827593	Nigerian Indigenous Dog	PRJNA266585	SRR2827593
SRR2827594	Nigerian Indigenous Dog	PRJNA266585	SRR2827594
SRR2827595	Vietnamese Indigenous Dog	PRJNA266585	SRR2827595
SRR2827596	Vietnamese Indigenous Dog	PRJNA266585	SRR2827596
SRR2827597	Vietnamese Indigenous Dog	PRJNA266585	SRR2827597
SRR2827598	Vietnamese Indigenous Dog	PRJNA266585	SRR2827598
SRR2827599	Vietnamese Indigenous Dog	PRJNA266585	SRR2827599
SRR2827604	Jamthund	PRJNA266585	SRR2827604
SRR2827605	Jamthund	PRJNA266585	SRR2827605
SRR2827606	Chinese Indigenous Dog	PRJNA266585	SRR2827606
SRR2827607	Chinese Indigenous Dog	PRJNA266585	SRR2827607
SRR4011154	Shetland Sheepdog	PRJNA338147	SRR4011154
SRR4011155	German Shepherd	PRJNA338147	SRR4011155
SRR5190659	Collie	PRJNA338147	SRR5190659
SRR5190660	Collie	PRJNA338147	SRR5190660
SRR5190661	Collie	PRJNA338147	SRR5190661
SRR5190662	Collie	PRJNA338147	SRR5190662
SRR5190663	Collie	PRJNA338147	SRR5190663
SRR7120157	Dalmatian dog	PRJNA448733	SRR7120157
SRR7120158	Flat Coated Retriever	PRJNA448733	SRR7120158
SRR7120159	Fonni Dog	PRJNA448733	SRR7120159
SRR7120196	Portuguese Water Dog	PRJNA448733	SRR7120196
SRR7120198	Portuguese Water Dog	PRJNA448733	SRR7120198
SRR7120199	Portuguese Water Dog	PRJNA448733	SRR7120199
SRR7120200	Portuguese Water Dog	PRJNA448733	SRR7120200
SRR7120201	Portuguese Water Dog	PRJNA448733	SRR7120201
SRR7120203	Portuguese Water Dog	PRJNA448733	SRR7120203
SRR7120204	Rottweiler	PRJNA448733	SRR7120204
SRR7120205	Rottweiler	PRJNA448733	SRR7120205
SRR7120206	Rottweiler	PRJNA448733	SRR7120206
SRR7120207	Rottweiler	PRJNA448733	SRR7120207
SRR7120208	Rottweiler	PRJNA448733	SRR7120208
SRR7120211	Samoyed	PRJNA448733	SRR7120211
SRR7120212	Scottish Terrier	PRJNA448733	SRR7120212
SRR7120213	Scottish Terrier	PRJNA448733	SRR7120213
SRR7120232	West Highland White Terrier	PRJNA448733	SRR7120232
SRR7120233	West Highland White Terrier	PRJNA448733	SRR7120233
SRR7120234	West Highland White Terrier	PRJNA448733	SRR7120234
SRS661486	Wolf Great Lakes	PRJNA255370	SAMN02921310
SRS661488	Wolf Iran	PRJNA255370	SAMN02921312
SRS661492	Wolf Portugal	PRJNA255370	SAMN02921316
SRS661495	Wolf Spain	PRJNA255370	SAMN02921319
SRS661496	Wolf Yellowstone	PRJNA255370	SAMN02921320
SRS713815	Chinese Crested dog	PRJNA261736	SAMN03075611
SRS732550	Pembroke Welsh Corgi	PRJNA263947	SAMN03145703
SRS732551	Pembroke Welsh Corgi	PRJNA263947	SAMN03145704
SRS833812	Black Russian Terrier	PRJNA263947	SAMN03323668
SRS932138	Shetland Sheepdog	PRJNA263947	SAMN03580413
SRS932143	Standard Poodle	PRJNA263947	SAMN03580408
SRS932144	Border Terrier	PRJNA263947	SAMN03580407
SRS932145	Tibetan Terrier	PRJNA263947	SAMN03580406
SRS932146	Berger Picard	PRJNA263947	SAMN03580405
SRS932147	Jack Russell Terrier	PRJNA263947	SAMN03580404
SRS932148	Tibetan Terrier	PRJNA263947	SAMN03580403
SRS932149	Golden Retriever	PRJNA263947	SAMN03580402
SRS932150	Scottish Deerhound	PRJNA263947	SAMN03580401
SRS932151	Jack Russell Terrier	PRJNA263947	SAMN03580400
SRS932152	Labrador Retriever	PRJNA263947	SAMN03580399
SRS932153	West Highland White Terrier	PRJNA263947	SAMN03580398
SRS932157	Scottish Terrier	PRJNA263947	SAMN03580394
SRS932158	Basenji	PRJNA263947	SAMN03580393
SRS932159	German Shepherd	PRJNA263947	SAMN03580392
SRS932160	English Springer Spaniel	PRJNA263947	SAMN03580391
SRS932161	Airedale Terrier	PRJNA263947	SAMN03580390
SRS932162	Border Collie	PRJNA263947	SAMN03580389
SRS932163	Portuguese Podengo	PRJNA263947	SAMN03580388
SRS932164	Kerry Blue Terrier	PRJNA263947	SAMN03580387
SS004	Shetland Sheepdog	PRJEB16012	SAMEA104091573
SS096	Shetland Sheepdog	PRJEB16012	SAMEA4867921
STB24	St. Bernard	PRJEB16012	SAMEA4848702
STB27	St. Bernard	PRJEB16012	SAMEA4848703
SV_25951	Swedish Vallhund	PRJEB21485	ERR2834335
SY001	Alaskan Husky (not purebred)	PRJEB9590	SAMEA3449656
SY018	Alaskan Husky (not purebred)	PRJEB9591	SAMEA3449657
SY046	Siberian Husky	PRJEB16012	SAMEA104091559
SZ004__PER00751	Shih Tzu	PRJNA448733	SRR7120214
SZ005_SEA05009	Shih Tzu	PRJEB16012	SAMEA5209194
SZ006_SEA05080	Shih Tzu	PRJEB16012	SAMEA5209195
TA001	Airedale Terrier	PRJEB16012	SAMEA4506896
TM1	Tibetan Mastiff	PRJNA266585
TM10	Tibetan Mastiff	PRJNA266585
TM2	Tibetan Mastiff	PRJNA266585
TM3	Tibetan Mastiff	PRJNA266585
TM4	Tibetan Mastiff	PRJNA266585
TM5	Tibetan Mastiff	PRJNA266585
TM6	Tibetan Mastiff	PRJNA266585
TM7	Tibetan Mastiff	PRJNA266585
TM8	Tibetan Mastiff	PRJNA266585
TM9	Tibetan Mastiff	PRJNA266585
V_23005	Vizsla (smooth coat)	PRJEB12340	ERR1210830
WE006	Weimaraner	PRJEB16012	SAMEA4506902
WE008	Weimaraner	PRJEB16012	SAMEA104283466
WH083	Whippet	PRJEB16012	SAMEA4506886
WH118	Whippet	PRJEB16012	SAMEA5657394
WH122	Whippet	PRJEB16012	SAMEA5657395
WO001_895	wolf	PRJEB16012	SAMEA104091563
WO002_732	wolf	PRJEB16012	SAMEA104091564
WO003_636	wolf	PRJEB16012	SAMEA104091565
WW174	West Highland White Terrier	PRJEB16012	SAMEA4506901
WW361	West Highland White Terrier	PRJEB16012	SAMEA4504842
WW362	West Highland White Terrier	PRJEB16012	SAMEA4509489
WW363	West Highland White Terrier	PRJEB16012	SAMEA4504843
WW364	West Highland White Terrier	PRJEB16012	SAMEA4504836
WW558	West Highland White Terrier	PRJEB16012	SAMEA104091561
WW635__West04	West Highland White Terrier	PRJEB16012	SAMEA5059501
WW637__West06	West Highland White Terrier	PRJEB16012	SAMEA5059502
WW639__West10	West Highland White Terrier	PRJEB16012	SAMEA5059503
WW64	West Highland White Terrier	PRJEB13723	SAMEA3940300
WW640__West13	West Highland White Terrier	PRJEB16012	SAMEA5059504
WW641__West16	West Highland White Terrier	PRJEB16012	SAMEA5059505
WW642__West19	West Highland White Terrier	PRJEB16012	SAMEA5059506
WW643__West24	West Highland White Terrier	PRJEB16012	SAMEA5059507
WW644__West25	West Highland White Terrier	PRJEB16012	SAMEA5059508
WW645__West26	West Highland White Terrier	PRJEB16012	SAMEA5059509
WW646__West30	West Highland White Terrier	PRJEB16012	SAMEA5059510
WW647__Zombie	Dutch Shepherd	PRJEB16012	SAMEA5059511
WW665	West Highland White Terrier	PRJEB16012	SAMEA4848706
YJ1	Chinese Indigenous Dog	PRJNA266585
YJ2	Chinese Indigenous Dog	PRJNA266585
YJ3	Chinese Indigenous Dog	PRJNA266585
YJ4	Chinese Indigenous Dog	PRJNA266585
YJ5	Chinese Indigenous Dog	PRJNA266585
YJ6	Chinese Indigenous Dog	PRJNA266585
YJ7	Chinese Indigenous Dog	PRJNA266585
YJ9	Chinese Indigenous Dog	PRJNA266585
YT003	Yorkshire Terrier	PRJEB13468	SAMEA3928145
YT024__PER_BAN00032	Yorkshire Terrier	PRJNA448733	SRR7120237
YT025__PER_BAN00040	Yorkshire Terrier	PRJNA448733	SRR7120238
YT027__PER_BAN00079	Yorkshire Terrier	PRJNA448733	SRR7120239
YT028__PER_BAN00119	Yorkshire Terrier	PRJEB16012	SAMEA5209196
YT030__PER_BAN00133	Yorkshire Terrier	PRJNA448733	SRR7120241
YT031__PER_BAN00136	Yorkshire Terrier	PRJNA448733	SRR7120242
YT032__PER_BAN00140	Yorkshire Terrier	PRJEB16012	SAMEA5209197
YT033__PER_BAN00142	Yorkshire Terrier	PRJEB16012	SAMEA5209198
YT036__PER_BAN00183	Yorkshire Terrier	PRJNA448733	SRR7120244
YT040__PER_BAN00283	Yorkshire Terrier	PRJNA448733	SRR7120246
YT041__PER_BAN00289	Yorkshire Terrier	PRJNA448733	SRR7120247
YT044__PER_BAN00368	Yorkshire Terrier	PRJNA448733	SRR7120248
YT046__PER_BAN00380	Yorkshire Terrier	PRJNA448733	SRR7120249
YT048__PER_BAN00437	Yorkshire Terrier	PRJNA448733	SRR7120250
YT049__PER_BAN00449	Yorkshire Terrier	PRJNA448733	SRR7120251
YT050__PER_BAN00461	Yorkshire Terrier	PRJNA448733	SRR7120252
YT052__PER00016	Yorkshire Terrier	PRJNA448733	SRR7120253
YT053__PER00018	Yorkshire Terrier	PRJNA448733	SRR7120254
YT055__PER00061	Yorkshire Terrier	PRJNA448733	SRR7120256
YT056__PER00064	Yorkshire Terrier	PRJNA448733	SRR7120257
YT058__PER00107	Yorkshire Terrier	PRJNA448733	SRR7120259
YT059__PER00138	Yorkshire Terrier	PRJNA448733	SRR7120260
YT062__PER00144	Yorkshire Terrier	PRJNA448733	SRR7120262
YT065__PER00204	Yorkshire Terrier	PRJNA448733	SRR7120264
YT066__PER00226	Yorkshire Terrier	PRJNA448733	SRR7120265
YT067__PER00259	Yorkshire Terrier	PRJNA448733	SRR7120266
YT068__PER00274	Yorkshire Terrier	PRJNA448733	SRR7120267
YT070__PER00314	Yorkshire Terrier	PRJNA448733	SRR7120269
YT073__PER00327	Yorkshire Terrier	PRJNA448733	SRR7120272
YT074__PER00344	Yorkshire Terrier	PRJNA448733	SRR7120273
YT076__PER00361	Yorkshire Terrier	PRJNA448733	SRR7120274
YT077__PER00393	Yorkshire Terrier	PRJNA448733	SRR7120275
YT078__PER00394	Yorkshire Terrier	PRJNA448733	SRR7120276
YT079__PER00408	Yorkshire Terrier	PRJNA448733	SRR7120277
YT080__PER00409	Yorkshire Terrier	PRJNA448733	SRR7120278
YT081__PER00419	Yorkshire Terrier	PRJEB16012	SAMEA5209199
YT082__PER00425	Yorkshire Terrier	PRJNA448733	SRR7120279
YT085__PER00449	Yorkshire Terrier	PRJEB16012	SAMEA5209200
YT087__PER00462	Yorkshire Terrier	PRJNA448733	SRR7120283
YT088__PER00465	Yorkshire Terrier	PRJNA448733	SRR7120284
YT089__PER00481	Yorkshire Terrier	PRJNA448733	SRR7120285
YT090__PER00484	Yorkshire Terrier	PRJNA448733	SRR7120286
YT091__PER00550	Yorkshire Terrier	PRJNA448733	SRR7120287
YT092__PER00594	Yorkshire Terrier	PRJNA448733	SRR7120288
YT094__PER00605	Yorkshire Terrier	PRJNA448733	SRR7120290
YT095__PER00606	Yorkshire Terrier	PRJNA448733	SRR7120291
YT096__PER00607	Yorkshire Terrier	PRJNA448733	SRR7120292
YT097__PER00622	Yorkshire Terrier	PRJNA448733	SRR7120293
YT098__PER00626	Yorkshire Terrier	PRJNA448733	SRR7120294
YT101__PER00642	Yorkshire Terrier	PRJNA448733	SRR7120296
YT102__PER00646	Yorkshire Terrier	PRJNA448733	SRR7120297
YT103__PER00650	Yorkshire Terrier	PRJNA448733	SRR7120298
YT104__PER00658	Yorkshire Terrier	PRJNA448733	SRR7120299
YT105__PER00738	Yorkshire Terrier	PRJNA448733	SRR7120300
YT106__PER00739	Yorkshire Terrier	PRJNA448733	SRR7120301
YT108__PER00750	Yorkshire Terrier	PRJNA448733	SRR7120303
YT109__PER00758	Yorkshire Terrier	PRJNA448733	SRR7120304
YT110__PER00777	Yorkshire Terrier	PRJNA448733	SRR7120305
YT111__PER00806	Yorkshire Terrier	PRJNA448733	SRR7120306
YT112__PER00816	Yorkshire Terrier	PRJNA448733	SRR7120307
ZS14	Landseer	PRJEB7734	SAMEA3121328
ZS14_2	Pomeranian	PRJEB16012	SAMEA4506892
ZS554_SEA05298	Pomeranian	PRJEB16012	SAMEA5209201
ZS555_PLM00063	Pomeranian	PRJEB16012	SAMEA5209203
ZZ023__MS04593	Pomeranian	PRJEB16012	SAMEA5209202
ZZ024_MS13	Miniature Schnauzer	PRJEB16012	SAMEA5059514
ZZ025_MS25	Miniature Schnauzer	PRJEB16012	SAMEA5059515
ZZ026_MS80	Miniature Schnauzer	PRJEB16012	SAMEA5059516
ZZ028_MS171	Miniature Schnauzer	PRJEB16012	SAMEA5059517
ZZ029_MS190	Miniature Schnauzer	PRJEB16012	SAMEA5059518
ZZ030_MS241	Miniature Schnauzer	PRJEB16012	SAMEA5059519
ZZ031_MS249	Miniature Schnauzer	PRJEB16012	SAMEA5059520
ZZ032_MS251	Miniature Schnauzer	PRJEB16012	SAMEA5059521
ZZ034_MS260	Miniature Schnauzer	PRJEB16012	SAMEA5059522
ZZ035_MS279	Miniature Schnauzer	PRJEB16012	SAMEA5059523
ZZ16_MS06	Miniature Schnauzer	PRJEB16012	SAMEA3444493
ZZ17_MS07	Miniature Schnauzer	PRJEB16012	SAMEA1066474
ZZ18_MS08	Miniature Schnauzer	PRJEB16012	SAMEA1066475
ZZ19_MS09	Miniature Schnauzer	PRJEB16012	SAMEA1066476
