# Supplementary material for: A DSG1 Frameshift Variant in a Rottweiler Dog with Footpad Hyperkeratosis
Source: Genes (Basel). 2020 Apr 24;11(4):469. doi: 10.3390/genes11040469 (PMC7230267; doi:10.3390/genes11040469)
Supplement: Supplementary file 1 [file genes-11-00469-s001.zip › TableS2_private_variants.xlsx]

## Sheet: private homozygous variants
Table S2. Private variants in the sequenced Rottweiler with footpad hyperkeratosis. Private variants were obtained by filtering all variants that were present at least once in 655 control genomes. This resulted in 842 homozygous and 3290 heterozygous private variants for the affected dog. Please note that variants are listed multiple times, if they have predicted effects on more than one transcri…
#CHROM	POS	REF	ALT	FILTER	EFFECT	IMPACT	GENE	GENEID	FEATURE	FEATUREID	BIOTYPE	RANK	HGVS_C	HGVS_P
10	16418875	A	T	PASS	intergenic_region	MODIFIER	LOC111097607-LOC100685114	111097607-100685114	intergenic_region	111097607-100685114		-1	n.16418875A>T
10	34017741	G	GGGCTTAATCCAATTGTAAATCCAAAATATACTTTTAAAAA	PASS	intron_variant	MODIFIER	TXNRD1	474536	transcript	NM_001122673.1	protein_coding	1	c.88+3720_88+3721insTTTTTAAAAGTATATTTTGGATTTACAATTGGATTAAGCC
10	34017741	G	GGGCTTAATCCAATTGTAAATCCAAAATATACTTTTAAAAA	PASS	intron_variant	MODIFIER	LOC111097681	111097681	transcript	XR_002630663.1	pseudogene	1	n.52-770_52-769insGGCTTAATCCAATTGTAAATCCAAAATATACTTTTAAAAA
10	35857329	T	C	GATKstd	downstream_gene_variant	MODIFIER	LOC100688158	100688158	transcript	100688158	pseudogene	-1	n.*299A>G
10	35857329	T	C	GATKstd	intergenic_region	MODIFIER	LOC102154326-LOC100688158	102154326-100688158	intergenic_region	102154326-100688158		-1	n.35857329T>C
10	35857331	TC	T	PASS	downstream_gene_variant	MODIFIER	LOC100688158	100688158	transcript	100688158	pseudogene	-1	n.*296delG
10	35857331	TC	T	PASS	intergenic_region	MODIFIER	LOC102154326-LOC100688158	102154326-100688158	intergenic_region	102154326-100688158		-1	n.35857332delC
10	35857334	TGGAAGCTCCCCCC	T	PASS	downstream_gene_variant	MODIFIER	LOC100688158	100688158	transcript	100688158	pseudogene	-1	n.*281_*293delGGGGGGAGCTTCC
10	35857334	TGGAAGCTCCCCCC	T	PASS	intergenic_region	MODIFIER	LOC102154326-LOC100688158	102154326-100688158	intergenic_region	102154326-100688158		-1	n.35857335_35857347delGGAAGCTCCCCCC
10	36667267	G	A	GATKstd	downstream_gene_variant	MODIFIER	LOC111097843	111097843	transcript	XR_002631046.1	pseudogene	-1	n.*897C>T
10	36667267	G	A	GATKstd	intergenic_region	MODIFIER	LOC100688434-LOC111097843	100688434-111097843	intergenic_region	100688434-111097843		-1	n.36667267G>A
10	36667292	T	TC	PASS	downstream_gene_variant	MODIFIER	LOC111097843	111097843	transcript	XR_002631046.1	pseudogene	-1	n.*871_*872insG
10	36667292	T	TC	PASS	intergenic_region	MODIFIER	LOC100688434-LOC111097843	100688434-111097843	intergenic_region	100688434-111097843		-1	n.36667292_36667293insC
10	36667294	G	GTGT	PASS	downstream_gene_variant	MODIFIER	LOC111097843	111097843	transcript	XR_002631046.1	pseudogene	-1	n.*869_*870insACA
10	36667294	G	GTGT	PASS	intergenic_region	MODIFIER	LOC100688434-LOC111097843	100688434-111097843	intergenic_region	100688434-111097843		-1	n.36667294_36667295insTGT
10	68058351	C	T	GATKstd	upstream_gene_variant	MODIFIER	LOC111097808	111097808	transcript	XR_002630964.1	pseudogene	-1	n.-3852G>A
10	68058351	C	T	GATKstd	upstream_gene_variant	MODIFIER	LOC111097808	111097808	transcript	XR_002630965.1	pseudogene	-1	n.-3852G>A
10	68058351	C	T	GATKstd	intergenic_region	MODIFIER	LOC111097808-GFPT1	111097808-474624	intergenic_region	111097808-474624		-1	n.68058351C>T
10	68717333	C	T	GATKstd	intron_variant	MODIFIER	LOC102151723	102151723	transcript	XM_022424324.1	protein_coding	2	c.621+145G>A
10	68718116	AG	A	PASS	intron_variant	MODIFIER	LOC102151723	102151723	transcript	XM_022424324.1	protein_coding	1	c.86-104delC
10	68841688	G	A	PASS	5_prime_UTR_variant	MODIFIER	FAM136A	612657	transcript	XM_850389.4	protein_coding	1	c.-15C>T
10	68841688	G	A	PASS	upstream_gene_variant	MODIFIER	SNRPG	612653	transcript	NM_001252331.1	protein_coding	-1	c.-4985C>T
11	8750439	A	ATCATATAGCATTTCTTTTTTTTTTTTTTTTTTTTTTTTTTTTTTTTTTTT	PASS	intron_variant	MODIFIER	HSD17B4	474630	transcript	XM_005626345.3	protein_coding	8	c.701-2422_701-2421insTCATATAGCATTTCTTTTTTTTTTTTTTTTTTTTTTTTTTTTTTTTTTTT
11	8750439	A	ATCATATAGCATTTCTTTTTTTTTTTTTTTTTTTTTTTTTTTTTTTTTTTT	PASS	intron_variant	MODIFIER	HSD17B4	474630	transcript	XM_531860.6	protein_coding	8	c.626-2422_626-2421insTCATATAGCATTTCTTTTTTTTTTTTTTTTTTTTTTTTTTTTTTTTTTTT
11	8750439	A	ATCATATAGCATTTCTTTTTTTTTTTTTTTTTTTTTTTTTTTTTTTTTTTT	PASS	intron_variant	MODIFIER	HSD17B4	474630	transcript	XM_014117634.1	protein_coding	8	c.212-2422_212-2421insTCATATAGCATTTCTTTTTTTTTTTTTTTTTTTTTTTTTTTTTTTTTTTT
11	8750439	A	ATCATATAGCATTTCTTTTTTTTTTTTTTTTTTTTTTTTTTTTTTTTTTTT	PASS	intron_variant	MODIFIER	HSD17B4	474630	transcript	XM_022425144.1	protein_coding	3	c.281-2422_281-2421insTCATATAGCATTTCTTTTTTTTTTTTTTTTTTTTTTTTTTTTTTTTTTTT
11	9248836	C	G	GATKstd	intergenic_region	MODIFIER	LOC102151165-LOC102155120	102151165-102155120	intergenic_region	102151165-102155120		-1	n.9248836C>G
11	32693281	A	C	GATKstd	intergenic_region	MODIFIER	LOC100684799-LOC100856273	100684799-100856273	intergenic_region	100684799-100856273		-1	n.32693281A>C
11	32693296	A	C	GATKstd	intergenic_region	MODIFIER	LOC100684799-LOC100856273	100684799-100856273	intergenic_region	100684799-100856273		-1	n.32693296A>C
11	40052409	T	TGGGGGGG	PASS	intron_variant	MODIFIER	MLLT3	481556	transcript	XM_538677.6	protein_coding	2	c.194-6569_194-6568insCCCCCCC
11	40052409	T	TGGGGGGG	PASS	intron_variant	MODIFIER	MLLT3	481556	transcript	XM_014117789.2	protein_coding	2	c.185-6569_185-6568insCCCCCCC
11	40052409	T	TGGGGGGG	PASS	intron_variant	MODIFIER	MLLT3	481556	transcript	XM_022425476.1	protein_coding	2	c.194-6569_194-6568insCCCCCCC
11	40052410	A	AGGAGCAAGATGGCGGAAGAGTAGGGTC	PASS	intron_variant	MODIFIER	MLLT3	481556	transcript	XM_538677.6	protein_coding	2	c.194-6570_194-6569insGACCCTACTCTTCCGCCATCTTGCTCC
11	40052410	A	AGGAGCAAGATGGCGGAAGAGTAGGGTC	PASS	intron_variant	MODIFIER	MLLT3	481556	transcript	XM_014117789.2	protein_coding	2	c.185-6570_185-6569insGACCCTACTCTTCCGCCATCTTGCTCC
11	40052410	A	AGGAGCAAGATGGCGGAAGAGTAGGGTC	PASS	intron_variant	MODIFIER	MLLT3	481556	transcript	XM_022425476.1	protein_coding	2	c.194-6570_194-6569insGACCCTACTCTTCCGCCATCTTGCTCC
11	40984882	A	ATTTTTTTTTTTTTTTTTTTTTTTTTTTTTT	PASS	intergenic_region	MODIFIER	LOC102152624-MTAP	102152624-474729	intergenic_region	102152624-474729		-1	n.40984882_40984883insTTTTTTTTTTTTTTTTTTTTTTTTTTTTTT
11	45029086	T	C	GATKstd	intron_variant	MODIFIER	LOC106559485	106559485	transcript	XR_001317306.2	pseudogene	1	n.1207+6504A>G
11	47610798	T	TTCCCCCCG	PASS	intergenic_region	MODIFIER	LOC611718-LOC106559530	611718-106559530	intergenic_region	611718-106559530		-1	n.47610798_47610799insTCCCCCCG
11	47610805	C	A	GATKstd	intergenic_region	MODIFIER	LOC611718-LOC106559530	611718-106559530	intergenic_region	611718-106559530		-1	n.47610805C>A
11	47610806	T	A	GATKstd	intergenic_region	MODIFIER	LOC611718-LOC106559530	611718-106559530	intergenic_region	611718-106559530		-1	n.47610806T>A
12	6819259	G	GGGGGAGGAGGGGGGGAGGGGAGGAGGGGGGAGGGGGGA	PASS	upstream_gene_variant	MODIFIER	ZFAND3	481776	transcript	XM_014118409.2	protein_coding	-1	c.-1243_-1242insGGGGAGGAGGGGGGGAGGGGAGGAGGGGGGAGGGGGGA
12	6819259	G	GGGGGAGGAGGGGGGGAGGGGAGGAGGGGGGAGGGGGGA	PASS	upstream_gene_variant	MODIFIER	ZFAND3	481776	transcript	XM_022426011.1	protein_coding	-1	c.-104500_-104499insGGGGAGGAGGGGGGGAGGGGAGGAGGGGGGAGGGGGGA
12	6819259	G	GGGGGAGGAGGGGGGGAGGGGAGGAGGGGGGAGGGGGGA	PASS	upstream_gene_variant	MODIFIER	ZFAND3	481776	transcript	XM_538897.6	protein_coding	-1	c.-1243_-1242insGGGGAGGAGGGGGGGAGGGGAGGAGGGGGGAGGGGGGA
12	6819259	G	GGGGGAGGAGGGGGGGAGGGGAGGAGGGGGGAGGGGGGA	PASS	intron_variant	MODIFIER	LOC111098244	111098244	transcript	XR_002631826.1	pseudogene	1	n.193-142_193-141insTCCCCCCTCCCCCCTCCTCCCCTCCCCCCCTCCTCCCC
12	6826077	C	CTT	PASS	intron_variant	MODIFIER	ZFAND3	481776	transcript	XM_014118409.2	protein_coding	1	c.71+5505_71+5506insTT
12	6826077	C	CTT	PASS	intron_variant	MODIFIER	ZFAND3	481776	transcript	XM_022426011.1	protein_coding	1	c.-14+6306_-14+6307insTT
12	6826077	C	CTT	PASS	intron_variant	MODIFIER	ZFAND3	481776	transcript	XM_538897.6	protein_coding	1	c.71+5505_71+5506insTT
12	6826083	T	TTCTTTC	PASS	intron_variant	MODIFIER	ZFAND3	481776	transcript	XM_014118409.2	protein_coding	1	c.71+5511_71+5512insTCTTTC
12	6826083	T	TTCTTTC	PASS	intron_variant	MODIFIER	ZFAND3	481776	transcript	XM_022426011.1	protein_coding	1	c.-14+6312_-14+6313insTCTTTC
12	6826083	T	TTCTTTC	PASS	intron_variant	MODIFIER	ZFAND3	481776	transcript	XM_538897.6	protein_coding	1	c.71+5511_71+5512insTCTTTC
12	6985175	CT	C	PASS	intron_variant	MODIFIER	ZFAND3	481776	transcript	XM_014118409.2	protein_coding	3	c.142+32110delT
12	6985175	CT	C	PASS	intron_variant	MODIFIER	ZFAND3	481776	transcript	XM_022426011.1	protein_coding	2	c.28+61390delT
12	6985175	CT	C	PASS	intron_variant	MODIFIER	ZFAND3	481776	transcript	XM_538897.6	protein_coding	2	c.112+61390delT
12	8527160	A	G	GATKstd	intron_variant	MODIFIER	KIF6	481782	transcript	XM_014118247.2	protein_coding	5	c.470+1692T>C
12	10484309	AG	A	PASS	3_prime_UTR_variant	MODIFIER	TOMM6	609079	transcript	XM_005627335.2	protein_coding	3	c.*1549delG		INFO_REALIGN_3_PRIME
12	10484309	AG	A	PASS	intron_variant	MODIFIER	USP49	474899	transcript	XM_022426033.1	protein_coding	4	c.1541-1121delC
12	10484309	AG	A	PASS	intron_variant	MODIFIER	USP49	474899	transcript	XR_002631861.1	pseudogene	4	n.1702-1121delC
12	10484309	AG	A	PASS	intron_variant	MODIFIER	USP49	474899	transcript	XR_002631862.1	pseudogene	4	n.1702-1121delC
12	11556908	C	G	GATKstd	downstream_gene_variant	MODIFIER	RRP36	100687900	transcript	XM_003431728.4	protein_coding	-1	c.*3352C>G
12	11556908	C	G	GATKstd	downstream_gene_variant	MODIFIER	CUL7	481807	transcript	XM_022426061.1	protein_coding	-1	c.*2785G>C
12	11556908	C	G	GATKstd	downstream_gene_variant	MODIFIER	CUL7	481807	transcript	XM_022426062.1	protein_coding	-1	c.*2785G>C
12	11556908	C	G	GATKstd	downstream_gene_variant	MODIFIER	CUL7	481807	transcript	XM_538928.6	protein_coding	-1	c.*2785G>C
12	11556908	C	G	GATKstd	intergenic_region	MODIFIER	RRP36-CUL7	100687900-481807	intergenic_region	100687900-481807		-1	n.11556908C>G
12	12981229	G	A	GATKstd	intergenic_region	MODIFIER	CDC5L-LOC111098271	474921-111098271	intergenic_region	474921-111098271		-1	n.12981229G>A
12	24978105	C	T	GATKstd	intergenic_region	MODIFIER	LOC111098164-LOC100688417	111098164-100688417	intergenic_region	111098164-100688417		-1	n.24978105C>T
12	24978108	CG	C	PASS	intergenic_region	MODIFIER	LOC111098164-LOC100688417	111098164-100688417	intergenic_region	111098164-100688417		-1	n.24978109delG
12	40402172	G	T	PASS	intron_variant	MODIFIER	LOC111098329	111098329	transcript	XR_002632026.1	pseudogene	4	n.507-22285G>T
13	28080115	A	G	GATKstd	intergenic_region	MODIFIER	LOC111098453-LOC106559616	111098453-106559616	intergenic_region	111098453-106559616		-1	n.28080115A>G
13	28201262	AT	A	PASS	intergenic_region	MODIFIER	LOC106559616-475101	106559616-475101	intergenic_region	106559616-475101		-1	n.28201263delT
13	28224183	C	T	GATKstd	intergenic_region	MODIFIER	LOC106559616-475101	106559616-475101	intergenic_region	106559616-475101		-1	n.28224183C>T
13	28263799	T	G	GATKstd	intergenic_region	MODIFIER	LOC106559616-475101	106559616-475101	intergenic_region	106559616-475101		-1	n.28263799T>G
13	28277819	G	A	GATKstd	intergenic_region	MODIFIER	LOC106559616-475101	106559616-475101	intergenic_region	106559616-475101		-1	n.28277819G>A
13	28337279	C	A	PASS	downstream_gene_variant	MODIFIER	LOC102152956	102152956	transcript	XR_293867.2	pseudogene	-1	n.*2590C>A
13	28337279	C	A	PASS	intergenic_region	MODIFIER	LOC102152956-EFR3A	102152956-475102	intergenic_region	102152956-475102		-1	n.28337279C>A
13	28413616	C	G	PASS	intergenic_region	MODIFIER	LOC102152956-EFR3A	102152956-475102	intergenic_region	102152956-475102		-1	n.28413616C>G
13	28534743	GC	G	PASS	intergenic_region	MODIFIER	LOC102152956-EFR3A	102152956-475102	intergenic_region	102152956-475102		-1	n.28534744delC
13	28802175	C	T	PASS	intron_variant	MODIFIER	KCNQ3	475103	transcript	XM_532334.4	protein_coding	8	c.1203-1651G>A		WARNING_TRANSCRIPT_NO_START_CODON
13	28844172	T	A	PASS	intron_variant	MODIFIER	KCNQ3	475103	transcript	XM_532334.4	protein_coding	1	c.354-22429A>T		WARNING_TRANSCRIPT_NO_START_CODON
13	28969665	C	A	PASS	intron_variant	MODIFIER	KCNQ3	475103	transcript	XM_532334.4	protein_coding	1	c.353+92354G>T		WARNING_TRANSCRIPT_NO_START_CODON
13	30273414	G	A	GATKstd	intergenic_region	MODIFIER	LOC102153580-LOC111098558	102153580-111098558	intergenic_region	102153580-111098558		-1	n.30273414G>A
13	30965685	TGGCG	T	PASS	upstream_gene_variant	MODIFIER	LOC111098560	111098560	transcript	XR_002632492.1	pseudogene	-1	n.-4178_-4175delCGCC
13	30965685	TGGCG	T	PASS	intron_variant	MODIFIER	LOC111098561	111098561	transcript	XR_002632494.1	pseudogene	1	n.134-8304_134-8301delGGCG
13	31221781	C	A	GATKstd	intergenic_region	MODIFIER	LOC102154124-LOC111098562	102154124-111098562	intergenic_region	102154124-111098562		-1	n.31221781C>A
13	31293539	G	A	GATKstd	intergenic_region	MODIFIER	LOC111098562-LOC111098563	111098562-111098563	intergenic_region	111098562-111098563		-1	n.31293539G>A
13	31496722	TTTC	T	PASS	intron_variant	MODIFIER	KHDRBS3	475106	transcript	XM_022426731.1	protein_coding	4	c.472-1280_472-1278delTTC
13	31496722	TTTC	T	PASS	intron_variant	MODIFIER	KHDRBS3	475106	transcript	XR_002632499.1	pseudogene	4	n.528-1280_528-1278delTTC
13	31496722	TTTC	T	PASS	intron_variant	MODIFIER	KHDRBS3	475106	transcript	XM_022426734.1	protein_coding	4	c.472-1280_472-1278delTTC
13	31496722	TTTC	T	PASS	intron_variant	MODIFIER	KHDRBS3	475106	transcript	XR_002632504.1	pseudogene	4	n.526-1280_526-1278delTTC
13	31496722	TTTC	T	PASS	intron_variant	MODIFIER	KHDRBS3	475106	transcript	XM_022426735.1	protein_coding	4	c.472-1280_472-1278delTTC
13	31496722	TTTC	T	PASS	intron_variant	MODIFIER	KHDRBS3	475106	transcript	XR_002632505.1	pseudogene	4	n.525-1280_525-1278delTTC
13	31496722	TTTC	T	PASS	intron_variant	MODIFIER	KHDRBS3	475106	transcript	XM_022426733.1	protein_coding	4	c.472-1280_472-1278delTTC
13	31496722	TTTC	T	PASS	intron_variant	MODIFIER	KHDRBS3	475106	transcript	XM_843255.5	protein_coding	4	c.472-1280_472-1278delTTC
13	31496722	TTTC	T	PASS	intron_variant	MODIFIER	KHDRBS3	475106	transcript	XR_002632502.1	pseudogene	4	n.525-1280_525-1278delTTC
13	31496722	TTTC	T	PASS	intron_variant	MODIFIER	KHDRBS3	475106	transcript	XR_293881.3	pseudogene	4	n.525-1280_525-1278delTTC
13	31496722	TTTC	T	PASS	intron_variant	MODIFIER	KHDRBS3	475106	transcript	XR_002632506.1	pseudogene	4	n.523-1280_523-1278delTTC
13	31496722	TTTC	T	PASS	intron_variant	MODIFIER	KHDRBS3	475106	transcript	XR_002632507.1	pseudogene	4	n.523-1280_523-1278delTTC
13	31496722	TTTC	T	PASS	intron_variant	MODIFIER	KHDRBS3	475106	transcript	XM_022426736.1	protein_coding	4	c.472-1280_472-1278delTTC
13	31496722	TTTC	T	PASS	intron_variant	MODIFIER	KHDRBS3	475106	transcript	XM_014118695.2	protein_coding	4	c.472-1280_472-1278delTTC
13	31496722	TTTC	T	PASS	intron_variant	MODIFIER	KHDRBS3	475106	transcript	XM_005627987.3	protein_coding	4	c.472-1280_472-1278delTTC
13	31496722	TTTC	T	PASS	intron_variant	MODIFIER	KHDRBS3	475106	transcript	XR_002632503.1	pseudogene	4	n.523-1280_523-1278delTTC
13	31496722	TTTC	T	PASS	intron_variant	MODIFIER	KHDRBS3	475106	transcript	XR_002632500.1	pseudogene	4	n.518-1280_518-1278delTTC
13	31496722	TTTC	T	PASS	intron_variant	MODIFIER	KHDRBS3	475106	transcript	XR_002632501.1	pseudogene	4	n.407-1280_407-1278delTTC
13	34401753	G	T	GATKstd	intron_variant	MODIFIER	LOC111098570	111098570	transcript	XR_002632534.1	pseudogene	1	n.114-27903C>A
13	62290313	C	G	GATKstd	intron_variant	MODIFIER	LOC482194	482194	transcript	XM_005628284.2	protein_coding	13	c.1798-3172C>G
13	62290313	C	G	GATKstd	intron_variant	MODIFIER	LOC482194	482194	transcript	XM_014118853.2	protein_coding	13	c.1651-3172C>G
14	1163240	G	T	GATKstd	intergenic_region	MODIFIER	JMJD4-LOC482210	475182-482210	intergenic_region	475182-482210		-1	n.1163240G>T
14	2475932	C	G	GATKstd	intergenic_region	MODIFIER	LOC482236-LOC100687351	482236-100687351	intergenic_region	482236-100687351		-1	n.2475932C>G
14	4230417	C	T	GATKstd	intron_variant	MODIFIER	CHCHD3	607574	transcript	XM_843362.5	protein_coding	1	c.81+301C>T
14	4230417	C	T	GATKstd	intron_variant	MODIFIER	CHCHD3	607574	transcript	XR_002632815.1	pseudogene	1	n.257+301C>T
14	4230417	C	T	GATKstd	intron_variant	MODIFIER	CHCHD3	607574	transcript	XM_014119027.2	protein_coding	1	c.81+301C>T
14	4764906	G	A	GATKstd	intron_variant	MODIFIER	PLXNA4	482251	transcript	XM_539370.6	protein_coding	2	c.1186-43G>A
14	4764906	G	A	GATKstd	intron_variant	MODIFIER	PLXNA4	482251	transcript	XM_022427202.1	protein_coding	2	c.1186-43G>A
14	6123080	C	T	PASS	downstream_gene_variant	MODIFIER	LOC102155478	102155478	transcript	XR_002632823.1	pseudogene	-1	n.*2381C>T
14	6123080	C	T	PASS	downstream_gene_variant	MODIFIER	LOC102155478	102155478	transcript	XR_001317655.2	pseudogene	-1	n.*2381C>T
14	6123080	C	T	PASS	intron_variant	MODIFIER	LOC102155478	102155478	transcript	XR_002632822.1	pseudogene	8	n.1357+2103C>T
14	12018140	G	GGATGCT	PASS	intron_variant	MODIFIER	LOC111098737	111098737	transcript	XR_002632855.1	pseudogene	1	n.83-5927_83-5926insAGCATC
14	27934363	A	G	PASS	intergenic_region	MODIFIER	LOC111098673-ETV1	111098673-475246	intergenic_region	111098673-475246		-1	n.27934363A>G
14	27934721	G	T	PASS	intergenic_region	MODIFIER	LOC111098673-ETV1	111098673-475246	intergenic_region	111098673-475246		-1	n.27934721G>T
14	27934726	T	A	PASS	intergenic_region	MODIFIER	LOC111098673-ETV1	111098673-475246	intergenic_region	111098673-475246		-1	n.27934726T>A
14	32397689	A	AACCCCCATCCCCGGGCCGCTCCCGGGCCTGCGGGTCTCCGGCCGCCCGCCCAGCCTCCCTTCCCACCGGCCCCGCCCAGCCTCCGCCGCGCAGGGGCTCCTGGCCTGGCCTCTCCG	PASS	intergenic_region	MODIFIER	PRPS1L1-HDAC9	100686175-482339	intergenic_region	100686175-482339		-1	n.32397689_32397690insACCCCCATCCCCGGGCCGCTCCCGGGCCTGCGGGTCTCCGGCCGCCCGCCCAGCCTCCCTTCCCACCGGCCCCGCCCAGCCTCCGCCGCGCAGGGGCTCCTGGCCTGGCCTCTCCG
14	37528388	C	A	GATKstd	intergenic_region	MODIFIER	LOC100856158-LOC611172	100856158-611172	intergenic_region	100856158-611172		-1	n.37528388C>A
14	48921349	C	T	GATKstd	intergenic_region	MODIFIER	DNAJB9-LOC111098828	475286-111098828	intergenic_region	475286-111098828		-1	n.48921349C>T
14	50518068	C	T	GATKstd	intron_variant	MODIFIER	IMMP2L	611911	transcript	XM_005628736.3	protein_coding	6	c.409-29645G>A
14	50518068	C	T	GATKstd	intron_variant	MODIFIER	IMMP2L	611911	transcript	XM_022427588.1	protein_coding	5	c.343-29645G>A
14	50518068	C	T	GATKstd	intron_variant	MODIFIER	IMMP2L	611911	transcript	XM_849634.3	protein_coding	6	c.409-29645G>A
14	50518068	C	T	GATKstd	intron_variant	MODIFIER	IMMP2L	611911	transcript	XM_022427587.1	protein_coding	7	c.409-29645G>A
14	50518068	C	T	GATKstd	intron_variant	MODIFIER	IMMP2L	611911	transcript	XM_022427589.1	protein_coding	7	c.*12-29645G>A
14	50565338	C	A	GATKstd	intron_variant	MODIFIER	IMMP2L	611911	transcript	XM_005628736.3	protein_coding	6	c.409-76915G>T
14	50565338	C	A	GATKstd	intron_variant	MODIFIER	IMMP2L	611911	transcript	XM_022427588.1	protein_coding	5	c.343-76915G>T
14	50565338	C	A	GATKstd	intron_variant	MODIFIER	IMMP2L	611911	transcript	XM_849634.3	protein_coding	6	c.409-76915G>T
14	50565338	C	A	GATKstd	intron_variant	MODIFIER	IMMP2L	611911	transcript	XM_022427587.1	protein_coding	7	c.409-76915G>T
14	50565338	C	A	GATKstd	intron_variant	MODIFIER	IMMP2L	611911	transcript	XM_022427589.1	protein_coding	7	c.*11+38811G>T
14	50785824	T	C	GATKstd	intron_variant	MODIFIER	IMMP2L	611911	transcript	XM_005628736.3	protein_coding	4	c.240-24811A>G
14	50785824	T	C	GATKstd	intron_variant	MODIFIER	IMMP2L	611911	transcript	XM_022427588.1	protein_coding	4	c.240-91976A>G
14	50785824	T	C	GATKstd	intron_variant	MODIFIER	IMMP2L	611911	transcript	XM_849634.3	protein_coding	4	c.240-24811A>G
14	50785824	T	C	GATKstd	intron_variant	MODIFIER	IMMP2L	611911	transcript	XM_022427587.1	protein_coding	5	c.240-24811A>G
14	50785824	T	C	GATKstd	intron_variant	MODIFIER	IMMP2L	611911	transcript	XM_022427589.1	protein_coding	4	c.240-24811A>G
14	50803518	TAGGGCCTCTCC	T	PASS	intron_variant	MODIFIER	IMMP2L	611911	transcript	XM_005628736.3	protein_coding	4	c.240-42516_240-42506delGGAGAGGCCCT
14	50803518	TAGGGCCTCTCC	T	PASS	intron_variant	MODIFIER	IMMP2L	611911	transcript	XM_022427588.1	protein_coding	4	c.240-109681_240-109671delGGAGAGGCCCT
14	50803518	TAGGGCCTCTCC	T	PASS	intron_variant	MODIFIER	IMMP2L	611911	transcript	XM_849634.3	protein_coding	4	c.240-42516_240-42506delGGAGAGGCCCT
14	50803518	TAGGGCCTCTCC	T	PASS	intron_variant	MODIFIER	IMMP2L	611911	transcript	XM_022427587.1	protein_coding	5	c.240-42516_240-42506delGGAGAGGCCCT
14	50803518	TAGGGCCTCTCC	T	PASS	intron_variant	MODIFIER	IMMP2L	611911	transcript	XM_022427589.1	protein_coding	4	c.240-42516_240-42506delGGAGAGGCCCT
14	60754689	A	G	GATKstd	intron_variant	MODIFIER	SLC13A1	482431	transcript	XM_005628770.3	protein_coding	1	c.99+7225T>C
14	60754689	A	G	GATKstd	intron_variant	MODIFIER	SLC13A1	482431	transcript	XM_539548.6	protein_coding	1	c.99+7225T>C
14	60754689	A	G	GATKstd	intron_variant	MODIFIER	SLC13A1	482431	transcript	XM_014119112.2	protein_coding	1	c.99+7225T>C
14	60754692	A	G	GATKstd	intron_variant	MODIFIER	SLC13A1	482431	transcript	XM_005628770.3	protein_coding	1	c.99+7222T>C
14	60754692	A	G	GATKstd	intron_variant	MODIFIER	SLC13A1	482431	transcript	XM_539548.6	protein_coding	1	c.99+7222T>C
14	60754692	A	G	GATKstd	intron_variant	MODIFIER	SLC13A1	482431	transcript	XM_014119112.2	protein_coding	1	c.99+7222T>C
14	60754701	A	G	GATKstd	intron_variant	MODIFIER	SLC13A1	482431	transcript	XM_005628770.3	protein_coding	1	c.99+7213T>C
14	60754701	A	G	GATKstd	intron_variant	MODIFIER	SLC13A1	482431	transcript	XM_539548.6	protein_coding	1	c.99+7213T>C
14	60754701	A	G	GATKstd	intron_variant	MODIFIER	SLC13A1	482431	transcript	XM_014119112.2	protein_coding	1	c.99+7213T>C
15	8585801	C	T	GATKstd	intergenic_region	MODIFIER	LOC102152242-ZYG11B	102152242-482495	intergenic_region	102152242-482495		-1	n.8585801C>T
15	8585809	A	T	GATKstd	intergenic_region	MODIFIER	LOC102152242-ZYG11B	102152242-482495	intergenic_region	102152242-482495		-1	n.8585809A>T
15	8585830	T	C	GATKstd	intergenic_region	MODIFIER	LOC102152242-ZYG11B	102152242-482495	intergenic_region	102152242-482495		-1	n.8585830T>C
15	17376110	T	C	GATKstd	intron_variant	MODIFIER	OR03E02	482540	transcript	XM_022427673.1	protein_coding	1	c.79+346A>G
15	17821527	C	CCT	PASS	upstream_gene_variant	MODIFIER	LOC111099001	111099001	transcript	XR_002633470.1	pseudogene	-1	n.-4573_-4572insCT
15	17821527	C	CCT	PASS	intergenic_region	MODIFIER	PNP-LOC111099001	475393-111099001	intergenic_region	475393-111099001		-1	n.17821527_17821528insCT
15	28157362	TA	T	PASS	intergenic_region	MODIFIER	MGAT4C-LOC111098892	475418-111098892	intergenic_region	475418-111098892		-1	n.28157363delA
15	36622428	G	GCGGGCGCCCTCCGCCCCC	PASS	intergenic_region	MODIFIER	LOC111098903-LOC111090052	111098903-111090052	intergenic_region	111098903-111090052		-1	n.36622428_36622429insCGGGCGCCCTCCGCCCCC
15	36622430	G	GGCGCT	PASS	intergenic_region	MODIFIER	LOC111098903-LOC111090052	111098903-111090052	intergenic_region	111098903-111090052		-1	n.36622430_36622431insGCGCT
15	38821574	A	T	GATKstd	intron_variant	MODIFIER	ANKS1B	482621	transcript	XM_022403363.1	protein_coding	9	c.1273-40145T>A
15	38821574	A	T	GATKstd	intron_variant	MODIFIER	ANKS1B	482621	transcript	XM_022403375.1	protein_coding	8	c.739-40145T>A
15	38821574	A	T	GATKstd	intron_variant	MODIFIER	ANKS1B	482621	transcript	XM_005629264.2	protein_coding	9	c.1273-40145T>A
15	38821574	A	T	GATKstd	intron_variant	MODIFIER	ANKS1B	482621	transcript	XM_014119281.2	protein_coding	9	c.1273-40145T>A
15	38821574	A	T	GATKstd	intron_variant	MODIFIER	ANKS1B	482621	transcript	XM_014119282.2	protein_coding	9	c.1273-40145T>A
15	38821574	A	T	GATKstd	intron_variant	MODIFIER	ANKS1B	482621	transcript	XM_022403364.1	protein_coding	9	c.1273-40145T>A
15	38821574	A	T	GATKstd	intron_variant	MODIFIER	ANKS1B	482621	transcript	XM_022403365.1	protein_coding	9	c.1273-40145T>A
15	38821574	A	T	GATKstd	intron_variant	MODIFIER	ANKS1B	482621	transcript	XM_022403366.1	protein_coding	9	c.1273-40145T>A
15	38821574	A	T	GATKstd	intron_variant	MODIFIER	ANKS1B	482621	transcript	XM_022403368.1	protein_coding	9	c.1273-40145T>A
15	38821574	A	T	GATKstd	intron_variant	MODIFIER	ANKS1B	482621	transcript	XM_022403369.1	protein_coding	9	c.1273-40145T>A
15	38821574	A	T	GATKstd	intron_variant	MODIFIER	ANKS1B	482621	transcript	XM_022403371.1	protein_coding	9	c.1273-40145T>A
15	38821574	A	T	GATKstd	intron_variant	MODIFIER	ANKS1B	482621	transcript	XM_022403372.1	protein_coding	9	c.1273-40145T>A
15	38821574	A	T	GATKstd	intron_variant	MODIFIER	ANKS1B	482621	transcript	XM_022403373.1	protein_coding	9	c.1273-40145T>A
15	38821574	A	T	GATKstd	intron_variant	MODIFIER	ANKS1B	482621	transcript	XM_022403367.1	protein_coding	9	c.1273-40145T>A
15	38821574	A	T	GATKstd	intron_variant	MODIFIER	ANKS1B	482621	transcript	XM_022403374.1	protein_coding	9	c.1273-40145T>A
15	38821590	T	C	GATKstd	intron_variant	MODIFIER	ANKS1B	482621	transcript	XM_022403363.1	protein_coding	9	c.1273-40161A>G
15	38821590	T	C	GATKstd	intron_variant	MODIFIER	ANKS1B	482621	transcript	XM_022403375.1	protein_coding	8	c.739-40161A>G
15	38821590	T	C	GATKstd	intron_variant	MODIFIER	ANKS1B	482621	transcript	XM_005629264.2	protein_coding	9	c.1273-40161A>G
15	38821590	T	C	GATKstd	intron_variant	MODIFIER	ANKS1B	482621	transcript	XM_014119281.2	protein_coding	9	c.1273-40161A>G
15	38821590	T	C	GATKstd	intron_variant	MODIFIER	ANKS1B	482621	transcript	XM_014119282.2	protein_coding	9	c.1273-40161A>G
15	38821590	T	C	GATKstd	intron_variant	MODIFIER	ANKS1B	482621	transcript	XM_022403364.1	protein_coding	9	c.1273-40161A>G
15	38821590	T	C	GATKstd	intron_variant	MODIFIER	ANKS1B	482621	transcript	XM_022403365.1	protein_coding	9	c.1273-40161A>G
15	38821590	T	C	GATKstd	intron_variant	MODIFIER	ANKS1B	482621	transcript	XM_022403366.1	protein_coding	9	c.1273-40161A>G
15	38821590	T	C	GATKstd	intron_variant	MODIFIER	ANKS1B	482621	transcript	XM_022403368.1	protein_coding	9	c.1273-40161A>G
15	38821590	T	C	GATKstd	intron_variant	MODIFIER	ANKS1B	482621	transcript	XM_022403369.1	protein_coding	9	c.1273-40161A>G
15	38821590	T	C	GATKstd	intron_variant	MODIFIER	ANKS1B	482621	transcript	XM_022403371.1	protein_coding	9	c.1273-40161A>G
15	38821590	T	C	GATKstd	intron_variant	MODIFIER	ANKS1B	482621	transcript	XM_022403372.1	protein_coding	9	c.1273-40161A>G
15	38821590	T	C	GATKstd	intron_variant	MODIFIER	ANKS1B	482621	transcript	XM_022403373.1	protein_coding	9	c.1273-40161A>G
15	38821590	T	C	GATKstd	intron_variant	MODIFIER	ANKS1B	482621	transcript	XM_022403367.1	protein_coding	9	c.1273-40161A>G
15	38821590	T	C	GATKstd	intron_variant	MODIFIER	ANKS1B	482621	transcript	XM_022403374.1	protein_coding	9	c.1273-40161A>G
15	61321418	CGG	C	PASS	upstream_gene_variant	MODIFIER	CPE	475492	transcript	XM_005629393.3	protein_coding	-1	c.-196_-195delGG
15	61321418	CGG	C	PASS	intergenic_region	MODIFIER	MSMO1-CPE	475491-475492	intergenic_region	475491-475492		-1	n.61321419_61321420delGG
16	2361019	T	TGGGCGGGGGGTGGGGGTGACGGGCACTGAGG	PASS	intron_variant	MODIFIER	CNTNAP2	100687859	transcript	XM_003432080.4	protein_coding	21	c.3475+5623_3475+5624insCCTCAGTGCCCGTCACCCCCACCCCCCGCCC
16	2361019	T	TGGGCGGGGGGTGGGGGTGACGGGCACTGAGG	PASS	intron_variant	MODIFIER	CNTNAP2	100687859	transcript	XM_022403663.1	protein_coding	17	c.2680+5623_2680+5624insCCTCAGTGCCCGTCACCCCCACCCCCCGCCC
16	2361019	T	TGGGCGGGGGGTGGGGGTGACGGGCACTGAGG	PASS	intron_variant	MODIFIER	CNTNAP2	100687859	transcript	XM_022403662.1	protein_coding	17	c.2680+5623_2680+5624insCCTCAGTGCCCGTCACCCCCACCCCCCGCCC
16	5079595	A	T	GATKstd	intergenic_region	MODIFIER	LOC111090213-LOC111090154	111090213-111090154	intergenic_region	111090213-111090154		-1	n.5079595A>T
16	5079602	A	T	GATKstd	intergenic_region	MODIFIER	LOC111090213-LOC111090154	111090213-111090154	intergenic_region	111090213-111090154		-1	n.5079602A>T
16	10421785	TGCTCCTGAA	T	PASS	5_prime_UTR_variant	MODIFIER	LOC102155933	102155933	transcript	XM_022403755.1	protein_coding	1	c.-161_-153delCCTGAAGCT		INFO_REALIGN_3_PRIME
16	11726041	G	GA	PASS	intergenic_region	MODIFIER	LOC106559804-LOC102156087	106559804-102156087	intergenic_region	106559804-102156087		-1	n.11726041_11726042insA
16	54945567	A	C	GATKstd	intergenic_region	MODIFIER	LOC111090192-CSMD1	111090192-100683465	intergenic_region	111090192-100683465		-1	n.54945567A>C
16	59319544	G	A	GATKstd	intergenic_region	MODIFIER	LOC611292-LOC491522	611292-491522	intergenic_region	611292-491522		-1	n.59319544G>A
17	58998831	GGT	G	PASS	upstream_gene_variant	MODIFIER	TRNAH-GUG	111090777	transcript	111090777	pseudogene	-1	n.-4191_-4190delAC
17	58998831	GGT	G	PASS	downstream_gene_variant	MODIFIER	TRNAN-GUU	111090764	transcript	111090764	pseudogene	-1	n.*3440_*3441delGT
17	58998831	GGT	G	PASS	downstream_gene_variant	MODIFIER	TRNAV-CAC	111090778	transcript	111090778	pseudogene	-1	n.*435_*436delAC
17	58998831	GGT	G	PASS	intergenic_region	MODIFIER	TRNAN-GUU-TRNAV-CAC	111090764-111090778	intergenic_region	111090764-111090778		-1	n.58998832_58998833delGT
18	1890132	T	TCCC	PASS	downstream_gene_variant	MODIFIER	GRB10	607755	transcript	XM_014120815.2	protein_coding	-1	c.*659_*660insGGG
18	1890132	T	TCCC	PASS	intergenic_region	MODIFIER	DDC-GRB10	606852-607755	intergenic_region	606852-607755		-1	n.1890132_1890133insCCC
18	27478294	T	C	GATKstd	intergenic_region	MODIFIER	LOC111090929-LOC102151311	111090929-102151311	intergenic_region	111090929-102151311		-1	n.27478294T>C
18	27478306	G	A	GATKstd	intergenic_region	MODIFIER	LOC111090929-LOC102151311	111090929-102151311	intergenic_region	111090929-102151311		-1	n.27478306G>A
18	27478315	G	A	PASS	intergenic_region	MODIFIER	LOC111090929-LOC102151311	111090929-102151311	intergenic_region	111090929-102151311		-1	n.27478315G>A
18	29920672	G	A	GATKstd	intergenic_region	MODIFIER	LOC102151766-LOC100688112	102151766-100688112	intergenic_region	102151766-100688112		-1	n.29920672G>A
18	42235362	T	A	GATKstd	upstream_gene_variant	MODIFIER	LOC102157137	102157137	transcript	XM_022405454.1	protein_coding	-1	c.-7713T>A
18	42235362	T	A	GATKstd	upstream_gene_variant	MODIFIER	LOC102157137	102157137	transcript	XM_022405456.1	protein_coding	-1	c.-7713T>A
18	42235362	T	A	GATKstd	intron_variant	MODIFIER	LOC102157137	102157137	transcript	XM_022405453.1	protein_coding	1	c.-2344-4477T>A
18	42235362	T	A	GATKstd	intron_variant	MODIFIER	LOC102157137	102157137	transcript	XM_022405455.1	protein_coding	1	c.-2149+5024T>A
18	42235362	T	A	GATKstd	intron_variant	MODIFIER	LOC102157137	102157137	transcript	XM_022405457.1	protein_coding	1	c.-1713-4477T>A
18	42235362	T	A	GATKstd	intron_variant	MODIFIER	LOC102157137	102157137	transcript	XR_002615939.1	pseudogene	1	n.184-4477T>A
18	43337065	TG	T	PASS	upstream_gene_variant	MODIFIER	LOC111090971	111090971	transcript	XR_002615955.1	pseudogene	-1	n.-3336delC
18	43337065	TG	T	PASS	intron_variant	MODIFIER	PHF21A	483637	transcript	XM_014121046.2	protein_coding	4	c.54+932delG
18	43337065	TG	T	PASS	intron_variant	MODIFIER	PHF21A	483637	transcript	XM_014121048.2	protein_coding	3	c.54+932delG
18	43337065	TG	T	PASS	intron_variant	MODIFIER	PHF21A	483637	transcript	XM_014121052.2	protein_coding	5	c.54+932delG
18	43337065	TG	T	PASS	intron_variant	MODIFIER	PHF21A	483637	transcript	XM_022405495.1	protein_coding	6	c.54+932delG
18	43337065	TG	T	PASS	intron_variant	MODIFIER	PHF21A	483637	transcript	XM_022405498.1	protein_coding	6	c.54+932delG
18	43337065	TG	T	PASS	intron_variant	MODIFIER	PHF21A	483637	transcript	XM_022405487.1	protein_coding	5	c.54+932delG
18	43337065	TG	T	PASS	intron_variant	MODIFIER	PHF21A	483637	transcript	XM_022405496.1	protein_coding	6	c.54+932delG
18	43337065	TG	T	PASS	intron_variant	MODIFIER	PHF21A	483637	transcript	XM_022405497.1	protein_coding	6	c.54+932delG
18	43337065	TG	T	PASS	intron_variant	MODIFIER	PHF21A	483637	transcript	XM_022405492.1	protein_coding	6	c.54+932delG
18	43337065	TG	T	PASS	intron_variant	MODIFIER	PHF21A	483637	transcript	XM_014121049.2	protein_coding	6	c.54+932delG
18	43337065	TG	T	PASS	intron_variant	MODIFIER	PHF21A	483637	transcript	XM_014121051.2	protein_coding	6	c.54+932delG
18	43337065	TG	T	PASS	intron_variant	MODIFIER	PHF21A	483637	transcript	XM_022405489.1	protein_coding	5	c.54+932delG
18	43337065	TG	T	PASS	intron_variant	MODIFIER	PHF21A	483637	transcript	XM_022405491.1	protein_coding	6	c.54+932delG
18	43337065	TG	T	PASS	intron_variant	MODIFIER	PHF21A	483637	transcript	XM_022405494.1	protein_coding	6	c.54+932delG
18	43337065	TG	T	PASS	intron_variant	MODIFIER	PHF21A	483637	transcript	XM_014121054.2	protein_coding	4	c.54+932delG
18	43337065	TG	T	PASS	intron_variant	MODIFIER	PHF21A	483637	transcript	XM_014121057.2	protein_coding	3	c.54+932delG
18	43337065	TG	T	PASS	intron_variant	MODIFIER	PHF21A	483637	transcript	XM_022405493.1	protein_coding	6	c.54+932delG
18	43337065	TG	T	PASS	intron_variant	MODIFIER	PHF21A	483637	transcript	XM_022405488.1	protein_coding	5	c.54+932delG
18	43337065	TG	T	PASS	intron_variant	MODIFIER	PHF21A	483637	transcript	XM_022405490.1	protein_coding	2	c.54+932delG
18	43337070	G	T	GATKstd	upstream_gene_variant	MODIFIER	LOC111090971	111090971	transcript	XR_002615955.1	pseudogene	-1	n.-3340C>A
18	43337070	G	T	GATKstd	intron_variant	MODIFIER	PHF21A	483637	transcript	XM_014121046.2	protein_coding	4	c.54+936G>T
18	43337070	G	T	GATKstd	intron_variant	MODIFIER	PHF21A	483637	transcript	XM_014121048.2	protein_coding	3	c.54+936G>T
18	43337070	G	T	GATKstd	intron_variant	MODIFIER	PHF21A	483637	transcript	XM_014121052.2	protein_coding	5	c.54+936G>T
18	43337070	G	T	GATKstd	intron_variant	MODIFIER	PHF21A	483637	transcript	XM_022405495.1	protein_coding	6	c.54+936G>T
18	43337070	G	T	GATKstd	intron_variant	MODIFIER	PHF21A	483637	transcript	XM_022405498.1	protein_coding	6	c.54+936G>T
18	43337070	G	T	GATKstd	intron_variant	MODIFIER	PHF21A	483637	transcript	XM_022405487.1	protein_coding	5	c.54+936G>T
18	43337070	G	T	GATKstd	intron_variant	MODIFIER	PHF21A	483637	transcript	XM_022405496.1	protein_coding	6	c.54+936G>T
18	43337070	G	T	GATKstd	intron_variant	MODIFIER	PHF21A	483637	transcript	XM_022405497.1	protein_coding	6	c.54+936G>T
18	43337070	G	T	GATKstd	intron_variant	MODIFIER	PHF21A	483637	transcript	XM_022405492.1	protein_coding	6	c.54+936G>T
18	43337070	G	T	GATKstd	intron_variant	MODIFIER	PHF21A	483637	transcript	XM_014121049.2	protein_coding	6	c.54+936G>T
18	43337070	G	T	GATKstd	intron_variant	MODIFIER	PHF21A	483637	transcript	XM_014121051.2	protein_coding	6	c.54+936G>T
18	43337070	G	T	GATKstd	intron_variant	MODIFIER	PHF21A	483637	transcript	XM_022405489.1	protein_coding	5	c.54+936G>T
18	43337070	G	T	GATKstd	intron_variant	MODIFIER	PHF21A	483637	transcript	XM_022405491.1	protein_coding	6	c.54+936G>T
18	43337070	G	T	GATKstd	intron_variant	MODIFIER	PHF21A	483637	transcript	XM_022405494.1	protein_coding	6	c.54+936G>T
18	43337070	G	T	GATKstd	intron_variant	MODIFIER	PHF21A	483637	transcript	XM_014121054.2	protein_coding	4	c.54+936G>T
18	43337070	G	T	GATKstd	intron_variant	MODIFIER	PHF21A	483637	transcript	XM_014121057.2	protein_coding	3	c.54+936G>T
18	43337070	G	T	GATKstd	intron_variant	MODIFIER	PHF21A	483637	transcript	XM_022405493.1	protein_coding	6	c.54+936G>T
18	43337070	G	T	GATKstd	intron_variant	MODIFIER	PHF21A	483637	transcript	XM_022405488.1	protein_coding	5	c.54+936G>T
18	43337070	G	T	GATKstd	intron_variant	MODIFIER	PHF21A	483637	transcript	XM_022405490.1	protein_coding	2	c.54+936G>T
18	43337074	C	G	GATKstd	upstream_gene_variant	MODIFIER	LOC111090971	111090971	transcript	XR_002615955.1	pseudogene	-1	n.-3344G>C
18	43337074	C	G	GATKstd	intron_variant	MODIFIER	PHF21A	483637	transcript	XM_014121046.2	protein_coding	4	c.54+940C>G
18	43337074	C	G	GATKstd	intron_variant	MODIFIER	PHF21A	483637	transcript	XM_014121048.2	protein_coding	3	c.54+940C>G
18	43337074	C	G	GATKstd	intron_variant	MODIFIER	PHF21A	483637	transcript	XM_014121052.2	protein_coding	5	c.54+940C>G
18	43337074	C	G	GATKstd	intron_variant	MODIFIER	PHF21A	483637	transcript	XM_022405495.1	protein_coding	6	c.54+940C>G
18	43337074	C	G	GATKstd	intron_variant	MODIFIER	PHF21A	483637	transcript	XM_022405498.1	protein_coding	6	c.54+940C>G
18	43337074	C	G	GATKstd	intron_variant	MODIFIER	PHF21A	483637	transcript	XM_022405487.1	protein_coding	5	c.54+940C>G
18	43337074	C	G	GATKstd	intron_variant	MODIFIER	PHF21A	483637	transcript	XM_022405496.1	protein_coding	6	c.54+940C>G
18	43337074	C	G	GATKstd	intron_variant	MODIFIER	PHF21A	483637	transcript	XM_022405497.1	protein_coding	6	c.54+940C>G
18	43337074	C	G	GATKstd	intron_variant	MODIFIER	PHF21A	483637	transcript	XM_022405492.1	protein_coding	6	c.54+940C>G
18	43337074	C	G	GATKstd	intron_variant	MODIFIER	PHF21A	483637	transcript	XM_014121049.2	protein_coding	6	c.54+940C>G
18	43337074	C	G	GATKstd	intron_variant	MODIFIER	PHF21A	483637	transcript	XM_014121051.2	protein_coding	6	c.54+940C>G
18	43337074	C	G	GATKstd	intron_variant	MODIFIER	PHF21A	483637	transcript	XM_022405489.1	protein_coding	5	c.54+940C>G
18	43337074	C	G	GATKstd	intron_variant	MODIFIER	PHF21A	483637	transcript	XM_022405491.1	protein_coding	6	c.54+940C>G
18	43337074	C	G	GATKstd	intron_variant	MODIFIER	PHF21A	483637	transcript	XM_022405494.1	protein_coding	6	c.54+940C>G
18	43337074	C	G	GATKstd	intron_variant	MODIFIER	PHF21A	483637	transcript	XM_014121054.2	protein_coding	4	c.54+940C>G
18	43337074	C	G	GATKstd	intron_variant	MODIFIER	PHF21A	483637	transcript	XM_014121057.2	protein_coding	3	c.54+940C>G
18	43337074	C	G	GATKstd	intron_variant	MODIFIER	PHF21A	483637	transcript	XM_022405493.1	protein_coding	6	c.54+940C>G
18	43337074	C	G	GATKstd	intron_variant	MODIFIER	PHF21A	483637	transcript	XM_022405488.1	protein_coding	5	c.54+940C>G
18	43337074	C	G	GATKstd	intron_variant	MODIFIER	PHF21A	483637	transcript	XM_022405490.1	protein_coding	2	c.54+940C>G
18	43337076	A	AG	PASS	upstream_gene_variant	MODIFIER	LOC111090971	111090971	transcript	XR_002615955.1	pseudogene	-1	n.-3347_-3346insC
18	43337076	A	AG	PASS	intron_variant	MODIFIER	PHF21A	483637	transcript	XM_014121046.2	protein_coding	4	c.54+942_54+943insG
18	43337076	A	AG	PASS	intron_variant	MODIFIER	PHF21A	483637	transcript	XM_014121048.2	protein_coding	3	c.54+942_54+943insG
18	43337076	A	AG	PASS	intron_variant	MODIFIER	PHF21A	483637	transcript	XM_014121052.2	protein_coding	5	c.54+942_54+943insG
18	43337076	A	AG	PASS	intron_variant	MODIFIER	PHF21A	483637	transcript	XM_022405495.1	protein_coding	6	c.54+942_54+943insG
18	43337076	A	AG	PASS	intron_variant	MODIFIER	PHF21A	483637	transcript	XM_022405498.1	protein_coding	6	c.54+942_54+943insG
18	43337076	A	AG	PASS	intron_variant	MODIFIER	PHF21A	483637	transcript	XM_022405487.1	protein_coding	5	c.54+942_54+943insG
18	43337076	A	AG	PASS	intron_variant	MODIFIER	PHF21A	483637	transcript	XM_022405496.1	protein_coding	6	c.54+942_54+943insG
18	43337076	A	AG	PASS	intron_variant	MODIFIER	PHF21A	483637	transcript	XM_022405497.1	protein_coding	6	c.54+942_54+943insG
18	43337076	A	AG	PASS	intron_variant	MODIFIER	PHF21A	483637	transcript	XM_022405492.1	protein_coding	6	c.54+942_54+943insG
18	43337076	A	AG	PASS	intron_variant	MODIFIER	PHF21A	483637	transcript	XM_014121049.2	protein_coding	6	c.54+942_54+943insG
18	43337076	A	AG	PASS	intron_variant	MODIFIER	PHF21A	483637	transcript	XM_014121051.2	protein_coding	6	c.54+942_54+943insG
18	43337076	A	AG	PASS	intron_variant	MODIFIER	PHF21A	483637	transcript	XM_022405489.1	protein_coding	5	c.54+942_54+943insG
18	43337076	A	AG	PASS	intron_variant	MODIFIER	PHF21A	483637	transcript	XM_022405491.1	protein_coding	6	c.54+942_54+943insG
18	43337076	A	AG	PASS	intron_variant	MODIFIER	PHF21A	483637	transcript	XM_022405494.1	protein_coding	6	c.54+942_54+943insG
18	43337076	A	AG	PASS	intron_variant	MODIFIER	PHF21A	483637	transcript	XM_014121054.2	protein_coding	4	c.54+942_54+943insG
18	43337076	A	AG	PASS	intron_variant	MODIFIER	PHF21A	483637	transcript	XM_014121057.2	protein_coding	3	c.54+942_54+943insG
18	43337076	A	AG	PASS	intron_variant	MODIFIER	PHF21A	483637	transcript	XM_022405493.1	protein_coding	6	c.54+942_54+943insG
18	43337076	A	AG	PASS	intron_variant	MODIFIER	PHF21A	483637	transcript	XM_022405488.1	protein_coding	5	c.54+942_54+943insG
18	43337076	A	AG	PASS	intron_variant	MODIFIER	PHF21A	483637	transcript	XM_022405490.1	protein_coding	2	c.54+942_54+943insG
18	43337082	A	T	GATKstd	upstream_gene_variant	MODIFIER	LOC111090971	111090971	transcript	XR_002615955.1	pseudogene	-1	n.-3352T>A
18	43337082	A	T	GATKstd	intron_variant	MODIFIER	PHF21A	483637	transcript	XM_014121046.2	protein_coding	4	c.54+948A>T
18	43337082	A	T	GATKstd	intron_variant	MODIFIER	PHF21A	483637	transcript	XM_014121048.2	protein_coding	3	c.54+948A>T
18	43337082	A	T	GATKstd	intron_variant	MODIFIER	PHF21A	483637	transcript	XM_014121052.2	protein_coding	5	c.54+948A>T
18	43337082	A	T	GATKstd	intron_variant	MODIFIER	PHF21A	483637	transcript	XM_022405495.1	protein_coding	6	c.54+948A>T
18	43337082	A	T	GATKstd	intron_variant	MODIFIER	PHF21A	483637	transcript	XM_022405498.1	protein_coding	6	c.54+948A>T
18	43337082	A	T	GATKstd	intron_variant	MODIFIER	PHF21A	483637	transcript	XM_022405487.1	protein_coding	5	c.54+948A>T
18	43337082	A	T	GATKstd	intron_variant	MODIFIER	PHF21A	483637	transcript	XM_022405496.1	protein_coding	6	c.54+948A>T
18	43337082	A	T	GATKstd	intron_variant	MODIFIER	PHF21A	483637	transcript	XM_022405497.1	protein_coding	6	c.54+948A>T
18	43337082	A	T	GATKstd	intron_variant	MODIFIER	PHF21A	483637	transcript	XM_022405492.1	protein_coding	6	c.54+948A>T
18	43337082	A	T	GATKstd	intron_variant	MODIFIER	PHF21A	483637	transcript	XM_014121049.2	protein_coding	6	c.54+948A>T
18	43337082	A	T	GATKstd	intron_variant	MODIFIER	PHF21A	483637	transcript	XM_014121051.2	protein_coding	6	c.54+948A>T
18	43337082	A	T	GATKstd	intron_variant	MODIFIER	PHF21A	483637	transcript	XM_022405489.1	protein_coding	5	c.54+948A>T
18	43337082	A	T	GATKstd	intron_variant	MODIFIER	PHF21A	483637	transcript	XM_022405491.1	protein_coding	6	c.54+948A>T
18	43337082	A	T	GATKstd	intron_variant	MODIFIER	PHF21A	483637	transcript	XM_022405494.1	protein_coding	6	c.54+948A>T
18	43337082	A	T	GATKstd	intron_variant	MODIFIER	PHF21A	483637	transcript	XM_014121054.2	protein_coding	4	c.54+948A>T
18	43337082	A	T	GATKstd	intron_variant	MODIFIER	PHF21A	483637	transcript	XM_014121057.2	protein_coding	3	c.54+948A>T
18	43337082	A	T	GATKstd	intron_variant	MODIFIER	PHF21A	483637	transcript	XM_022405493.1	protein_coding	6	c.54+948A>T
18	43337082	A	T	GATKstd	intron_variant	MODIFIER	PHF21A	483637	transcript	XM_022405488.1	protein_coding	5	c.54+948A>T
18	43337082	A	T	GATKstd	intron_variant	MODIFIER	PHF21A	483637	transcript	XM_022405490.1	protein_coding	2	c.54+948A>T
18	43337085	T	TG	PASS	upstream_gene_variant	MODIFIER	LOC111090971	111090971	transcript	XR_002615955.1	pseudogene	-1	n.-3356_-3355insC
18	43337085	T	TG	PASS	intron_variant	MODIFIER	PHF21A	483637	transcript	XM_014121046.2	protein_coding	4	c.54+951_54+952insG
18	43337085	T	TG	PASS	intron_variant	MODIFIER	PHF21A	483637	transcript	XM_014121048.2	protein_coding	3	c.54+951_54+952insG
18	43337085	T	TG	PASS	intron_variant	MODIFIER	PHF21A	483637	transcript	XM_014121052.2	protein_coding	5	c.54+951_54+952insG
18	43337085	T	TG	PASS	intron_variant	MODIFIER	PHF21A	483637	transcript	XM_022405495.1	protein_coding	6	c.54+951_54+952insG
18	43337085	T	TG	PASS	intron_variant	MODIFIER	PHF21A	483637	transcript	XM_022405498.1	protein_coding	6	c.54+951_54+952insG
18	43337085	T	TG	PASS	intron_variant	MODIFIER	PHF21A	483637	transcript	XM_022405487.1	protein_coding	5	c.54+951_54+952insG
18	43337085	T	TG	PASS	intron_variant	MODIFIER	PHF21A	483637	transcript	XM_022405496.1	protein_coding	6	c.54+951_54+952insG
18	43337085	T	TG	PASS	intron_variant	MODIFIER	PHF21A	483637	transcript	XM_022405497.1	protein_coding	6	c.54+951_54+952insG
18	43337085	T	TG	PASS	intron_variant	MODIFIER	PHF21A	483637	transcript	XM_022405492.1	protein_coding	6	c.54+951_54+952insG
18	43337085	T	TG	PASS	intron_variant	MODIFIER	PHF21A	483637	transcript	XM_014121049.2	protein_coding	6	c.54+951_54+952insG
18	43337085	T	TG	PASS	intron_variant	MODIFIER	PHF21A	483637	transcript	XM_014121051.2	protein_coding	6	c.54+951_54+952insG
18	43337085	T	TG	PASS	intron_variant	MODIFIER	PHF21A	483637	transcript	XM_022405489.1	protein_coding	5	c.54+951_54+952insG
18	43337085	T	TG	PASS	intron_variant	MODIFIER	PHF21A	483637	transcript	XM_022405491.1	protein_coding	6	c.54+951_54+952insG
18	43337085	T	TG	PASS	intron_variant	MODIFIER	PHF21A	483637	transcript	XM_022405494.1	protein_coding	6	c.54+951_54+952insG
18	43337085	T	TG	PASS	intron_variant	MODIFIER	PHF21A	483637	transcript	XM_014121054.2	protein_coding	4	c.54+951_54+952insG
18	43337085	T	TG	PASS	intron_variant	MODIFIER	PHF21A	483637	transcript	XM_014121057.2	protein_coding	3	c.54+951_54+952insG
18	43337085	T	TG	PASS	intron_variant	MODIFIER	PHF21A	483637	transcript	XM_022405493.1	protein_coding	6	c.54+951_54+952insG
18	43337085	T	TG	PASS	intron_variant	MODIFIER	PHF21A	483637	transcript	XM_022405488.1	protein_coding	5	c.54+951_54+952insG
18	43337085	T	TG	PASS	intron_variant	MODIFIER	PHF21A	483637	transcript	XM_022405490.1	protein_coding	2	c.54+951_54+952insG
18	43337090	G	C	GATKstd	upstream_gene_variant	MODIFIER	LOC111090971	111090971	transcript	XR_002615955.1	pseudogene	-1	n.-3360C>G
18	43337090	G	C	GATKstd	intron_variant	MODIFIER	PHF21A	483637	transcript	XM_014121046.2	protein_coding	4	c.54+956G>C
18	43337090	G	C	GATKstd	intron_variant	MODIFIER	PHF21A	483637	transcript	XM_014121048.2	protein_coding	3	c.54+956G>C
18	43337090	G	C	GATKstd	intron_variant	MODIFIER	PHF21A	483637	transcript	XM_014121052.2	protein_coding	5	c.54+956G>C
18	43337090	G	C	GATKstd	intron_variant	MODIFIER	PHF21A	483637	transcript	XM_022405495.1	protein_coding	6	c.54+956G>C
18	43337090	G	C	GATKstd	intron_variant	MODIFIER	PHF21A	483637	transcript	XM_022405498.1	protein_coding	6	c.54+956G>C
18	43337090	G	C	GATKstd	intron_variant	MODIFIER	PHF21A	483637	transcript	XM_022405487.1	protein_coding	5	c.54+956G>C
18	43337090	G	C	GATKstd	intron_variant	MODIFIER	PHF21A	483637	transcript	XM_022405496.1	protein_coding	6	c.54+956G>C
18	43337090	G	C	GATKstd	intron_variant	MODIFIER	PHF21A	483637	transcript	XM_022405497.1	protein_coding	6	c.54+956G>C
18	43337090	G	C	GATKstd	intron_variant	MODIFIER	PHF21A	483637	transcript	XM_022405492.1	protein_coding	6	c.54+956G>C
18	43337090	G	C	GATKstd	intron_variant	MODIFIER	PHF21A	483637	transcript	XM_014121049.2	protein_coding	6	c.54+956G>C
18	43337090	G	C	GATKstd	intron_variant	MODIFIER	PHF21A	483637	transcript	XM_014121051.2	protein_coding	6	c.54+956G>C
18	43337090	G	C	GATKstd	intron_variant	MODIFIER	PHF21A	483637	transcript	XM_022405489.1	protein_coding	5	c.54+956G>C
18	43337090	G	C	GATKstd	intron_variant	MODIFIER	PHF21A	483637	transcript	XM_022405491.1	protein_coding	6	c.54+956G>C
18	43337090	G	C	GATKstd	intron_variant	MODIFIER	PHF21A	483637	transcript	XM_022405494.1	protein_coding	6	c.54+956G>C
18	43337090	G	C	GATKstd	intron_variant	MODIFIER	PHF21A	483637	transcript	XM_014121054.2	protein_coding	4	c.54+956G>C
18	43337090	G	C	GATKstd	intron_variant	MODIFIER	PHF21A	483637	transcript	XM_014121057.2	protein_coding	3	c.54+956G>C
18	43337090	G	C	GATKstd	intron_variant	MODIFIER	PHF21A	483637	transcript	XM_022405493.1	protein_coding	6	c.54+956G>C
18	43337090	G	C	GATKstd	intron_variant	MODIFIER	PHF21A	483637	transcript	XM_022405488.1	protein_coding	5	c.54+956G>C
18	43337090	G	C	GATKstd	intron_variant	MODIFIER	PHF21A	483637	transcript	XM_022405490.1	protein_coding	2	c.54+956G>C
18	43722386	C	CGGGGTAGAGGACATCAGGGCCGGGGGCCCGGTTGGGGCTCCAGCTGCACTTCTTGGGGGACGCTCGGTGAGTGCCCTCGCTGGGAGGGCCCGGAGGGTATGGGAAGAGGTGCCAG	PASS	intergenic_region	MODIFIER	LOC102156491-CHST1	102156491-483642	intergenic_region	102156491-483642		-1	n.43722386_43722387insGGGGTAGAGGACATCAGGGCCGGGGGCCCGGTTGGGGCTCCAGCTGCACTTCTTGGGGGACGCTCGGTGAGTGCCCTCGCTGGGAGGGCCCGGAGGGTATGGGAAGAGGTGCCAG
18	45231266	T	A	GATKstd	intron_variant	MODIFIER	CHID1	475993	transcript	XM_003432455.3	protein_coding	10	c.960-3654A>T
18	45231266	T	A	GATKstd	intron_variant	MODIFIER	CHID1	475993	transcript	XR_002615974.1	pseudogene	10	n.1115-3654A>T
18	45373537	G	A	GATKstd	intron_variant	MODIFIER	MUC6	100855904	transcript	XM_022405118.1	protein_coding	2	c.121+182C>T
19	720424	G	A	PASS	intergenic_region	MODIFIER	USP38-INPP4B	476071-476072	intergenic_region	476071-476072		-1	n.720424G>A
19	2413736	T	C	PASS	upstream_gene_variant	MODIFIER	CLGN	476076	transcript	NM_001313774.1	protein_coding	-1	c.-908T>C
19	2413736	T	C	PASS	intron_variant	MODIFIER	CLGN	476076	transcript	XM_533285.6	protein_coding	1	c.22-899T>C
19	2580059	A	G	GATKstd	upstream_gene_variant	MODIFIER	MAML3	102154734	transcript	XM_022405893.1	protein_coding	-1	c.-311202A>G
19	2580059	A	G	GATKstd	upstream_gene_variant	MODIFIER	MAML3	102154734	transcript	XM_022405894.1	protein_coding	-1	c.-311202A>G
19	2580059	A	G	GATKstd	upstream_gene_variant	MODIFIER	MAML3	102154734	transcript	XM_022405895.1	protein_coding	-1	c.-311202A>G
19	2580059	A	G	GATKstd	intron_variant	MODIFIER	LOC102154677	102154677	transcript	XM_022405869.1	protein_coding	3	c.*800+549T>C
19	2580059	A	G	GATKstd	intron_variant	MODIFIER	MAML3	102154734	transcript	XR_002616132.1	pseudogene	17	n.3132-5161A>G
19	2580059	A	G	GATKstd	intron_variant	MODIFIER	MAML3	102154734	transcript	XR_002616133.1	pseudogene	17	n.3132-5161A>G
19	2580059	A	G	GATKstd	intron_variant	MODIFIER	MAML3	102154734	transcript	XR_002616134.1	pseudogene	17	n.3132-5161A>G
19	2580059	A	G	GATKstd	intron_variant	MODIFIER	MAML3	102154734	transcript	XR_002616136.1	pseudogene	17	n.3132-5161A>G
19	2580059	A	G	GATKstd	intron_variant	MODIFIER	MAML3	102154734	transcript	XR_002616138.1	pseudogene	17	n.3132-5161A>G
19	2580059	A	G	GATKstd	intron_variant	MODIFIER	MAML3	102154734	transcript	XR_002616135.1	pseudogene	17	n.3131-5161A>G
19	2580059	A	G	GATKstd	intron_variant	MODIFIER	MAML3	102154734	transcript	XR_002616137.1	pseudogene	17	n.3130-5161A>G
19	2580059	A	G	GATKstd	intron_variant	MODIFIER	MAML3	102154734	transcript	XM_022405889.1	protein_coding	18	c.-981-5161A>G
19	2580059	A	G	GATKstd	intron_variant	MODIFIER	MAML3	102154734	transcript	XM_022405890.1	protein_coding	16	c.-981-5161A>G
19	2580059	A	G	GATKstd	intron_variant	MODIFIER	MAML3	102154734	transcript	XM_022405892.1	protein_coding	9	c.-981-5161A>G
19	6056950	T	G	GATKstd	intergenic_region	MODIFIER	LOC100686645-LOC111091101	100686645-111091101	intergenic_region	100686645-111091101		-1	n.6056950T>G
19	11140838	GGA	G	PASS	intergenic_region	MODIFIER	LOC102157193-LOC111091104	102157193-111091104	intergenic_region	102157193-111091104		-1	n.11140839_11140840delGA
19	11140870	G	A	PASS	intergenic_region	MODIFIER	LOC102157193-LOC111091104	102157193-111091104	intergenic_region	102157193-111091104		-1	n.11140870G>A
19	14238324	CCTCCT	C	PASS	downstream_gene_variant	MODIFIER	LOC111091109	111091109	transcript	XR_002616188.1	pseudogene	-1	n.*958_*962delAGGAG
19	14238324	CCTCCT	C	PASS	downstream_gene_variant	MODIFIER	LOC111091109	111091109	transcript	XR_002616189.1	pseudogene	-1	n.*958_*962delAGGAG
19	14238324	CCTCCT	C	PASS	downstream_gene_variant	MODIFIER	LOC111091109	111091109	transcript	XR_002616190.1	pseudogene	-1	n.*958_*962delAGGAG
19	14238324	CCTCCT	C	PASS	intergenic_region	MODIFIER	LOC100687982-LOC111091109	100687982-111091109	intergenic_region	100687982-111091109		-1	n.14238325_14238329delCTCCT
19	15305051	G	A	GATKstd	intron_variant	MODIFIER	FAT4	483834	transcript	XM_005631826.3	protein_coding	1	c.5175+21820C>T
19	19634300	T	C	GATKstd	intergenic_region	MODIFIER	LOC609380-LOC609397	609380-609397	intergenic_region	609380-609397		-1	n.19634300T>C
19	19701486	G	A	GATKstd	intergenic_region	MODIFIER	LOC609397-LOC100682828	609397-100682828	intergenic_region	609397-100682828		-1	n.19701486G>A
19	19792191	G	A	GATKstd	upstream_gene_variant	MODIFIER	LOC100687250	100687250	transcript	100687250	pseudogene	-1	n.-1398G>A
19	19792191	G	A	GATKstd	downstream_gene_variant	MODIFIER	LOC111091050	111091050	transcript	XR_002616094.1	pseudogene	-1	n.*4151G>A
19	19792191	G	A	GATKstd	downstream_gene_variant	MODIFIER	LOC111091050	111091050	transcript	XR_002616095.1	pseudogene	-1	n.*4151G>A
19	19792191	G	A	GATKstd	intergenic_region	MODIFIER	LOC111091050-LOC100687250	111091050-100687250	intergenic_region	111091050-100687250		-1	n.19792191G>A
19	20697287	T	C	GATKstd	intron_variant	MODIFIER	ARHGEF4	483856	transcript	XM_540976.6	protein_coding	2	c.2876-14102T>C
19	20881600	C	T	GATKstd	intron_variant	MODIFIER	LOC111091129	111091129	transcript	XR_002616240.1	pseudogene	1	n.539-17312C>T
19	20881600	C	T	GATKstd	intron_variant	MODIFIER	LOC111091129	111091129	transcript	XR_002616241.1	pseudogene	1	n.539-17312C>T
19	20897564	C	T	PASS	intron_variant	MODIFIER	LOC111091129	111091129	transcript	XR_002616240.1	pseudogene	1	n.539-1348C>T
19	20897564	C	T	PASS	intron_variant	MODIFIER	LOC111091129	111091129	transcript	XR_002616241.1	pseudogene	1	n.539-1348C>T
19	20928015	T	A	GATKstd	intron_variant	MODIFIER	LOC111091129	111091129	transcript	XR_002616240.1	pseudogene	3	n.838+14005T>A
19	20928015	T	A	GATKstd	intron_variant	MODIFIER	LOC111091129	111091129	transcript	XR_002616241.1	pseudogene	3	n.838+14005T>A
19	22223787	G	A	PASS	intron_variant	MODIFIER	LOC102151686	102151686	transcript	XR_002616248.1	pseudogene	2	n.633-3442C>T
19	22223787	G	A	PASS	intron_variant	MODIFIER	LOC102151686	102151686	transcript	XR_002616245.1	pseudogene	2	n.633-3442C>T
19	22223787	G	A	PASS	intron_variant	MODIFIER	LOC102151686	102151686	transcript	XR_002616246.1	pseudogene	2	n.633-3442C>T
19	22223787	G	A	PASS	intron_variant	MODIFIER	LOC102151686	102151686	transcript	XR_002616247.1	pseudogene	3	n.551-3442C>T
19	22223787	G	A	PASS	intron_variant	MODIFIER	LOC102151686	102151686	transcript	XR_002616249.1	pseudogene	4	n.424-3442C>T
19	22223787	G	A	PASS	intron_variant	MODIFIER	LOC102151686	102151686	transcript	XR_294819.3	pseudogene	3	n.363-3442C>T
19	22477495	T	C	GATKstd	intron_variant	MODIFIER	UGGT1	476101	transcript	XM_022406002.1	protein_coding	17	c.1798-895A>G
19	22477495	T	C	GATKstd	intron_variant	MODIFIER	UGGT1	476101	transcript	XM_022406003.1	protein_coding	17	c.1798-895A>G
19	22477495	T	C	GATKstd	intron_variant	MODIFIER	UGGT1	476101	transcript	XM_005631858.2	protein_coding	17	c.1780-895A>G
19	22477495	T	C	GATKstd	intron_variant	MODIFIER	UGGT1	476101	transcript	XR_002616252.1	pseudogene	17	n.1814-895A>G
19	26140579	G	C	GATKstd	intron_variant	MODIFIER	CNTNAP5	483874	transcript	XM_005631764.3	protein_coding	3	c.381+62816C>G
19	26140579	G	C	GATKstd	intron_variant	MODIFIER	CNTNAP5	483874	transcript	NM_001048108.1	protein_coding	3	c.381+62816C>G
19	34891526	G	A	GATKstd	intergenic_region	MODIFIER	LOC111091162-LOC106560032	111091162-106560032	intergenic_region	111091162-106560032		-1	n.34891526G>A
19	34891527	A	T	GATKstd	intergenic_region	MODIFIER	LOC111091162-LOC106560032	111091162-106560032	intergenic_region	111091162-106560032		-1	n.34891527A>T
19	38393792	CAT	C	PASS	upstream_gene_variant	MODIFIER	R3HDM1	476129	transcript	XM_022406128.1	protein_coding	-1	c.-9458_-9457delAT
19	38393792	CAT	C	PASS	intron_variant	MODIFIER	R3HDM1	476129	transcript	XM_022406117.1	protein_coding	5	c.304-120_304-119delAT
19	38393792	CAT	C	PASS	intron_variant	MODIFIER	R3HDM1	476129	transcript	XM_005631950.3	protein_coding	5	c.304-120_304-119delAT
19	38393792	CAT	C	PASS	intron_variant	MODIFIER	R3HDM1	476129	transcript	XM_022406119.1	protein_coding	5	c.304-120_304-119delAT
19	38393792	CAT	C	PASS	intron_variant	MODIFIER	R3HDM1	476129	transcript	XM_022406120.1	protein_coding	4	c.262-120_262-119delAT
19	38393792	CAT	C	PASS	intron_variant	MODIFIER	R3HDM1	476129	transcript	XM_022406121.1	protein_coding	5	c.304-120_304-119delAT
19	38393792	CAT	C	PASS	intron_variant	MODIFIER	R3HDM1	476129	transcript	XM_022406122.1	protein_coding	5	c.304-120_304-119delAT
19	38393792	CAT	C	PASS	intron_variant	MODIFIER	R3HDM1	476129	transcript	XM_022406123.1	protein_coding	5	c.304-120_304-119delAT
19	38393792	CAT	C	PASS	intron_variant	MODIFIER	R3HDM1	476129	transcript	XM_022406124.1	protein_coding	3	c.172-120_172-119delAT
19	38393792	CAT	C	PASS	intron_variant	MODIFIER	R3HDM1	476129	transcript	XM_022406125.1	protein_coding	5	c.304-120_304-119delAT
19	38393792	CAT	C	PASS	intron_variant	MODIFIER	R3HDM1	476129	transcript	XM_022406126.1	protein_coding	5	c.304-120_304-119delAT
19	38393792	CAT	C	PASS	intron_variant	MODIFIER	R3HDM1	476129	transcript	XM_022406127.1	protein_coding	5	c.304-120_304-119delAT
19	38393792	CAT	C	PASS	intron_variant	MODIFIER	R3HDM1	476129	transcript	XM_022406129.1	protein_coding	3	c.172-120_172-119delAT
19	38393792	CAT	C	PASS	intron_variant	MODIFIER	R3HDM1	476129	transcript	XM_022406118.1	protein_coding	5	c.304-120_304-119delAT
19	50569672	G	A	GATKstd	intron_variant	MODIFIER	KIF5C	476144	transcript	XM_533351.5	protein_coding	1	c.127-15823G>A
1	722318	G	C	PASS	missense_variant	MODERATE	RBFA	606936	transcript	XM_014113052.1	protein_coding	2	c.133C>G	p.Arg45Gly
1	722318	G	C	PASS	5_prime_UTR_variant	MODIFIER	TXNL4A	476156	transcript	XM_005615276.3	protein_coding	1	c.-41G>C
1	722318	G	C	PASS	5_prime_UTR_variant	MODIFIER	TXNL4A	476156	transcript	XM_022407962.1	protein_coding	1	c.-50G>C
1	722318	G	C	PASS	5_prime_UTR_variant	MODIFIER	TXNL4A	476156	transcript	XM_533363.6	protein_coding	1	c.-29G>C
1	722318	G	C	PASS	5_prime_UTR_variant	MODIFIER	TXNL4A	476156	transcript	XM_014119994.2	protein_coding	1	c.-324G>C
1	6819173	G	A	GATKstd	intergenic_region	MODIFIER	LOC100856140-LOC100685678	100856140-100685678	intergenic_region	100856140-100685678		-1	n.6819173G>A
1	7690494	A	AT	PASS	intron_variant	MODIFIER	LOC111090580	111090580	transcript	XR_002615217.1	pseudogene	1	n.282-3318_282-3317insT
1	7690494	A	AT	PASS	intron_variant	MODIFIER	LOC111090580	111090580	transcript	XR_002615221.1	pseudogene	1	n.45-3318_45-3317insT
1	7690494	A	AT	PASS	intron_variant	MODIFIER	LOC111090580	111090580	transcript	XR_002615218.1	pseudogene	2	n.105-3318_105-3317insT
1	7690494	A	AT	PASS	intron_variant	MODIFIER	LOC111090580	111090580	transcript	XR_002615222.1	pseudogene	1	n.84+2486_84+2487insT
1	23504999	C	A	GATKstd	upstream_gene_variant	MODIFIER	LOC111095203	111095203	transcript	111095203	pseudogene	-1	n.-4544G>T
1	23504999	C	A	GATKstd	downstream_gene_variant	MODIFIER	LOC102154698	102154698	transcript	XR_291224.3	pseudogene	-1	n.*595G>T
1	23504999	C	A	GATKstd	downstream_gene_variant	MODIFIER	LOC102154698	102154698	transcript	XR_002615344.1	pseudogene	-1	n.*595G>T
1	23504999	C	A	GATKstd	intergenic_region	MODIFIER	LOC111095203-LOC102154698	111095203-102154698	intergenic_region	111095203-102154698		-1	n.23504999C>A
1	29953719	A	G	GATKstd	downstream_gene_variant	MODIFIER	LOC111090650	111090650	transcript	XR_002615386.1	pseudogene	-1	n.*2754T>C
1	29953719	A	G	GATKstd	intergenic_region	MODIFIER	OLIG3-LOC111090650	484005-111090650	intergenic_region	484005-111090650		-1	n.29953719A>G
1	63465843	TCCC	T	PASS	intron_variant	MODIFIER	NKAIN2	100688012	transcript	XM_014113513.2	protein_coding	3	c.240+41857_240+41859delCCC
1	63465843	TCCC	T	PASS	intron_variant	MODIFIER	NKAIN2	100688012	transcript	XM_022419659.1	protein_coding	3	c.240+41857_240+41859delCCC
1	85799241	G	A	PASS	intron_variant	MODIFIER	C1H9orf85	608739	transcript	XM_845851.5	protein_coding	1	c.102+7061C>T
1	87691449	A	G	GATKstd	intron_variant	MODIFIER	PTAR1	484173	transcript	XM_022421302.1	protein_coding	7	c.149+2176A>G
1	87691449	A	G	GATKstd	intron_variant	MODIFIER	C1H9orf135	608891	transcript	XM_022421374.1	protein_coding	2	c.-137+10722T>C
1	87691449	A	G	GATKstd	intron_variant	MODIFIER	C1H9orf135	608891	transcript	XM_014117649.2	protein_coding	2	c.-137+10722T>C
1	87691449	A	G	GATKstd	intron_variant	MODIFIER	PTAR1	484173	transcript	XM_022421320.1	protein_coding	7	c.149+2176A>G
1	87691449	A	G	GATKstd	intron_variant	MODIFIER	PTAR1	484173	transcript	XM_022421328.1	protein_coding	4	c.149+2176A>G
1	87691449	A	G	GATKstd	intron_variant	MODIFIER	PTAR1	484173	transcript	XM_022421307.1	protein_coding	5	c.149+2176A>G
1	87691449	A	G	GATKstd	intron_variant	MODIFIER	PTAR1	484173	transcript	XM_022421312.1	protein_coding	4	c.149+2176A>G
1	87691449	A	G	GATKstd	intron_variant	MODIFIER	PTAR1	484173	transcript	XM_022421323.1	protein_coding	4	c.149+2176A>G
1	87691458	G	T	GATKstd	intron_variant	MODIFIER	PTAR1	484173	transcript	XM_022421302.1	protein_coding	7	c.149+2185G>T
1	87691458	G	T	GATKstd	intron_variant	MODIFIER	C1H9orf135	608891	transcript	XM_022421374.1	protein_coding	2	c.-137+10713C>A
1	87691458	G	T	GATKstd	intron_variant	MODIFIER	C1H9orf135	608891	transcript	XM_014117649.2	protein_coding	2	c.-137+10713C>A
1	87691458	G	T	GATKstd	intron_variant	MODIFIER	PTAR1	484173	transcript	XM_022421320.1	protein_coding	7	c.149+2185G>T
1	87691458	G	T	GATKstd	intron_variant	MODIFIER	PTAR1	484173	transcript	XM_022421328.1	protein_coding	4	c.149+2185G>T
1	87691458	G	T	GATKstd	intron_variant	MODIFIER	PTAR1	484173	transcript	XM_022421307.1	protein_coding	5	c.149+2185G>T
1	87691458	G	T	GATKstd	intron_variant	MODIFIER	PTAR1	484173	transcript	XM_022421312.1	protein_coding	4	c.149+2185G>T
1	87691458	G	T	GATKstd	intron_variant	MODIFIER	PTAR1	484173	transcript	XM_022421323.1	protein_coding	4	c.149+2185G>T
1	106644972	T	TGAAGGGGGTGAGGACTAAAAAAAAAAAAAAAAAAAAAAAAAAAAAAAAAAAAAATAAAAAAAA	PASS	intron_variant	MODIFIER	NUP62	484370	transcript	XM_014118761.2	protein_coding	1	c.-65+8559_-65+8560insGAAGGGGGTGAGGACTAAAAAAAAAAAAAAAAAAAAAAAAAAAAAAAAAAAAAATAAAAAAAA
1	106644972	T	TGAAGGGGGTGAGGACTAAAAAAAAAAAAAAAAAAAAAAAAAAAAAAAAAAAAAATAAAAAAAA	PASS	intron_variant	MODIFIER	IL4I1	484371	transcript	XM_005616282.2	protein_coding	1	c.-241+8559_-241+8560insGAAGGGGGTGAGGACTAAAAAAAAAAAAAAAAAAAAAAAAAAAAAAAAAAAAAATAAAAAAAA
1	106644972	T	TGAAGGGGGTGAGGACTAAAAAAAAAAAAAAAAAAAAAAAAAAAAAAAAAAAAAATAAAAAAAA	PASS	intron_variant	MODIFIER	IL4I1	484371	transcript	XM_022423581.1	protein_coding	1	c.-303+8559_-303+8560insGAAGGGGGTGAGGACTAAAAAAAAAAAAAAAAAAAAAAAAAAAAAAAAAAAAAATAAAAAAAA
1	106644972	T	TGAAGGGGGTGAGGACTAAAAAAAAAAAAAAAAAAAAAAAAAAAAAAAAAAAAAATAAAAAAAA	PASS	intron_variant	MODIFIER	NUP62	484370	transcript	XM_022423625.1	protein_coding	1	c.-65+3466_-65+3467insGAAGGGGGTGAGGACTAAAAAAAAAAAAAAAAAAAAAAAAAAAAAAAAAAAAAATAAAAAAAA
1	110111160	G	C	GATKstd	intergenic_region	MODIFIER	FOSB-ERCC1	484445-612282	intergenic_region	484445-612282		-1	n.110111160G>C
1	112254419	G	A	GATKstd	downstream_gene_variant	MODIFIER	POU2F2	484478	transcript	XM_022403286.1	protein_coding	-1	c.*2792G>A
1	112254419	G	A	GATKstd	downstream_gene_variant	MODIFIER	POU2F2	484478	transcript	XM_022403305.1	protein_coding	-1	c.*2792G>A
1	112254419	G	A	GATKstd	downstream_gene_variant	MODIFIER	POU2F2	484478	transcript	XM_022403309.1	protein_coding	-1	c.*2792G>A
1	112254419	G	A	GATKstd	downstream_gene_variant	MODIFIER	POU2F2	484478	transcript	XM_022403287.1	protein_coding	-1	c.*2792G>A
1	112254419	G	A	GATKstd	downstream_gene_variant	MODIFIER	POU2F2	484478	transcript	XM_014120097.2	protein_coding	-1	c.*3580G>A
1	112254419	G	A	GATKstd	downstream_gene_variant	MODIFIER	POU2F2	484478	transcript	XM_005616519.3	protein_coding	-1	c.*3084G>A
1	112254419	G	A	GATKstd	downstream_gene_variant	MODIFIER	POU2F2	484478	transcript	XM_022403326.1	protein_coding	-1	c.*3084G>A
1	112254419	G	A	GATKstd	downstream_gene_variant	MODIFIER	POU2F2	484478	transcript	XM_022403336.1	protein_coding	-1	c.*3084G>A
1	112254419	G	A	GATKstd	downstream_gene_variant	MODIFIER	POU2F2	484478	transcript	XM_541592.7	protein_coding	-1	c.*3084G>A
1	112254419	G	A	GATKstd	downstream_gene_variant	MODIFIER	POU2F2	484478	transcript	XM_861140.6	protein_coding	-1	c.*3084G>A
1	112254419	G	A	GATKstd	downstream_gene_variant	MODIFIER	POU2F2	484478	transcript	XM_014120094.2	protein_coding	-1	c.*2792G>A
1	112254419	G	A	GATKstd	downstream_gene_variant	MODIFIER	POU2F2	484478	transcript	XM_022403289.1	protein_coding	-1	c.*2792G>A
1	112254419	G	A	GATKstd	downstream_gene_variant	MODIFIER	POU2F2	484478	transcript	XM_022403298.1	protein_coding	-1	c.*2792G>A
1	112254419	G	A	GATKstd	downstream_gene_variant	MODIFIER	POU2F2	484478	transcript	XM_022403320.1	protein_coding	-1	c.*2792G>A
1	112254419	G	A	GATKstd	downstream_gene_variant	MODIFIER	POU2F2	484478	transcript	XM_022403321.1	protein_coding	-1	c.*2792G>A
1	112254419	G	A	GATKstd	downstream_gene_variant	MODIFIER	POU2F2	484478	transcript	XM_022403322.1	protein_coding	-1	c.*2792G>A
1	112254419	G	A	GATKstd	downstream_gene_variant	MODIFIER	POU2F2	484478	transcript	XM_022403315.1	protein_coding	-1	c.*2792G>A
1	112254419	G	A	GATKstd	intron_variant	MODIFIER	LOC111090097	111090097	transcript	XR_002614334.1	pseudogene	2	n.1083-720C>T
1	112254424	AGGGG	A	PASS	downstream_gene_variant	MODIFIER	POU2F2	484478	transcript	XM_022403286.1	protein_coding	-1	c.*2798_*2801delGGGG
1	112254424	AGGGG	A	PASS	downstream_gene_variant	MODIFIER	POU2F2	484478	transcript	XM_022403305.1	protein_coding	-1	c.*2798_*2801delGGGG
1	112254424	AGGGG	A	PASS	downstream_gene_variant	MODIFIER	POU2F2	484478	transcript	XM_022403309.1	protein_coding	-1	c.*2798_*2801delGGGG
1	112254424	AGGGG	A	PASS	downstream_gene_variant	MODIFIER	POU2F2	484478	transcript	XM_022403287.1	protein_coding	-1	c.*2798_*2801delGGGG
1	112254424	AGGGG	A	PASS	downstream_gene_variant	MODIFIER	POU2F2	484478	transcript	XM_014120097.2	protein_coding	-1	c.*3586_*3589delGGGG
1	112254424	AGGGG	A	PASS	downstream_gene_variant	MODIFIER	POU2F2	484478	transcript	XM_005616519.3	protein_coding	-1	c.*3090_*3093delGGGG
1	112254424	AGGGG	A	PASS	downstream_gene_variant	MODIFIER	POU2F2	484478	transcript	XM_022403326.1	protein_coding	-1	c.*3090_*3093delGGGG
1	112254424	AGGGG	A	PASS	downstream_gene_variant	MODIFIER	POU2F2	484478	transcript	XM_022403336.1	protein_coding	-1	c.*3090_*3093delGGGG
1	112254424	AGGGG	A	PASS	downstream_gene_variant	MODIFIER	POU2F2	484478	transcript	XM_541592.7	protein_coding	-1	c.*3090_*3093delGGGG
1	112254424	AGGGG	A	PASS	downstream_gene_variant	MODIFIER	POU2F2	484478	transcript	XM_861140.6	protein_coding	-1	c.*3090_*3093delGGGG
1	112254424	AGGGG	A	PASS	downstream_gene_variant	MODIFIER	POU2F2	484478	transcript	XM_014120094.2	protein_coding	-1	c.*2798_*2801delGGGG
1	112254424	AGGGG	A	PASS	downstream_gene_variant	MODIFIER	POU2F2	484478	transcript	XM_022403289.1	protein_coding	-1	c.*2798_*2801delGGGG
1	112254424	AGGGG	A	PASS	downstream_gene_variant	MODIFIER	POU2F2	484478	transcript	XM_022403298.1	protein_coding	-1	c.*2798_*2801delGGGG
1	112254424	AGGGG	A	PASS	downstream_gene_variant	MODIFIER	POU2F2	484478	transcript	XM_022403320.1	protein_coding	-1	c.*2798_*2801delGGGG
1	112254424	AGGGG	A	PASS	downstream_gene_variant	MODIFIER	POU2F2	484478	transcript	XM_022403321.1	protein_coding	-1	c.*2798_*2801delGGGG
1	112254424	AGGGG	A	PASS	downstream_gene_variant	MODIFIER	POU2F2	484478	transcript	XM_022403322.1	protein_coding	-1	c.*2798_*2801delGGGG
1	112254424	AGGGG	A	PASS	downstream_gene_variant	MODIFIER	POU2F2	484478	transcript	XM_022403315.1	protein_coding	-1	c.*2798_*2801delGGGG
1	112254424	AGGGG	A	PASS	intron_variant	MODIFIER	LOC111090097	111090097	transcript	XR_002614334.1	pseudogene	2	n.1083-729_1083-726delCCCC
1	117378955	G	GGGGGGGGGGGGGGGGGGGGGGGGGGGGGGTCTGA	PASS	intergenic_region	MODIFIER	FAM187B-FXYD5	612665-612666	intergenic_region	612665-612666		-1	n.117378955_117378956insGGGGGGGGGGGGGGGGGGGGGGGGGGGGGTCTGA
1	117378963	GATT	G	PASS	intergenic_region	MODIFIER	FAM187B-FXYD5	612665-612666	intergenic_region	612665-612666		-1	n.117378964_117378966delATT
20	7959286	G	GAAA	PASS	intron_variant	MODIFIER	ATP2B2	476535	transcript	XM_005632157.3	protein_coding	5	c.398-1964_398-1963insAAA
20	7959286	G	GAAA	PASS	intron_variant	MODIFIER	ATP2B2	476535	transcript	XM_005632164.3	protein_coding	5	c.398-1964_398-1963insAAA
20	7959286	G	GAAA	PASS	intron_variant	MODIFIER	ATP2B2	476535	transcript	XM_005632165.3	protein_coding	5	c.398-1964_398-1963insAAA
20	7959286	G	GAAA	PASS	intron_variant	MODIFIER	ATP2B2	476535	transcript	XM_005632159.3	protein_coding	4	c.398-1964_398-1963insAAA
20	7959286	G	GAAA	PASS	intron_variant	MODIFIER	ATP2B2	476535	transcript	XM_005632163.3	protein_coding	5	c.398-1964_398-1963insAAA
20	7959286	G	GAAA	PASS	intron_variant	MODIFIER	ATP2B2	476535	transcript	XM_014121582.2	protein_coding	4	c.398-1964_398-1963insAAA
20	7959286	G	GAAA	PASS	intron_variant	MODIFIER	ATP2B2	476535	transcript	XM_533742.6	protein_coding	3	c.398-1964_398-1963insAAA
20	7959286	G	GAAA	PASS	intron_variant	MODIFIER	ATP2B2	476535	transcript	XM_014121581.2	protein_coding	3	c.398-1964_398-1963insAAA
20	7959286	G	GAAA	PASS	intron_variant	MODIFIER	ATP2B2	476535	transcript	XM_005632161.3	protein_coding	3	c.398-1964_398-1963insAAA
20	7959286	G	GAAA	PASS	intron_variant	MODIFIER	ATP2B2	476535	transcript	XM_022406368.1	protein_coding	2	c.398-1964_398-1963insAAA
20	7959286	G	GAAA	PASS	intron_variant	MODIFIER	ATP2B2	476535	transcript	XM_022406366.1	protein_coding	2	c.398-1964_398-1963insAAA
20	7959286	G	GAAA	PASS	intron_variant	MODIFIER	ATP2B2	476535	transcript	XM_022406367.1	protein_coding	2	c.398-1964_398-1963insAAA
20	7959286	G	GAAA	PASS	intron_variant	MODIFIER	ATP2B2	476535	transcript	XM_022406365.1	protein_coding	2	c.398-1964_398-1963insAAA
20	23955334	C	T	GATKstd	intron_variant	MODIFIER	SUCLG2	476562	transcript	XM_014121608.1	protein_coding	1	c.85-10674C>T
20	23955334	C	T	GATKstd	intron_variant	MODIFIER	SUCLG2	476562	transcript	XM_533767.4	protein_coding	1	c.85-10674C>T
20	38665433	C	G	GATKstd	downstream_gene_variant	MODIFIER	LOC100688691	100688691	transcript	100688691	pseudogene	-1	n.*111C>G
20	38665433	C	G	GATKstd	intron_variant	MODIFIER	DOCK3	476610	transcript	XM_022406664.1	protein_coding	1	c.38-36142G>C
20	38665433	C	G	GATKstd	intron_variant	MODIFIER	DOCK3	476610	transcript	XM_014121951.2	protein_coding	1	c.38-36142G>C
20	38665433	C	G	GATKstd	intron_variant	MODIFIER	DOCK3	476610	transcript	XM_014121953.2	protein_coding	1	c.38-36142G>C
20	38665433	C	G	GATKstd	intron_variant	MODIFIER	DOCK3	476610	transcript	XM_022406665.1	protein_coding	1	c.38-36142G>C
20	38665433	C	G	GATKstd	intron_variant	MODIFIER	DOCK3	476610	transcript	XM_022406666.1	protein_coding	1	c.38-36142G>C
20	38665433	C	G	GATKstd	intron_variant	MODIFIER	DOCK3	476610	transcript	XM_022406667.1	protein_coding	1	c.38-36142G>C
20	38665433	C	G	GATKstd	intron_variant	MODIFIER	DOCK3	476610	transcript	XM_022406668.1	protein_coding	1	c.38-36142G>C
20	38665433	C	G	GATKstd	intron_variant	MODIFIER	DOCK3	476610	transcript	XM_022406669.1	protein_coding	1	c.38-36142G>C
20	38665433	C	G	GATKstd	intron_variant	MODIFIER	DOCK3	476610	transcript	XM_022406670.1	protein_coding	1	c.38-36142G>C
20	38665433	C	G	GATKstd	intron_variant	MODIFIER	DOCK3	476610	transcript	XM_022406671.1	protein_coding	1	c.38-36142G>C
20	38665433	C	G	GATKstd	intron_variant	MODIFIER	DOCK3	476610	transcript	XM_022406672.1	protein_coding	1	c.38-36142G>C
20	38665433	C	G	GATKstd	intron_variant	MODIFIER	DOCK3	476610	transcript	XM_533813.6	protein_coding	1	c.38-36142G>C
21	6107417	G	GGC	PASS	downstream_gene_variant	MODIFIER	AMOTL1	485122	transcript	XM_005633345.3	protein_coding	-1	c.*7781_*7782insGC
21	6107417	G	GGC	PASS	downstream_gene_variant	MODIFIER	AMOTL1	485122	transcript	XM_005633350.3	protein_coding	-1	c.*7781_*7782insGC
21	6107417	G	GGC	PASS	downstream_gene_variant	MODIFIER	AMOTL1	485122	transcript	XM_014122616.2	protein_coding	-1	c.*7781_*7782insGC
21	6107417	G	GGC	PASS	downstream_gene_variant	MODIFIER	AMOTL1	485122	transcript	XM_022407498.1	protein_coding	-1	c.*7781_*7782insGC
21	6107417	G	GGC	PASS	downstream_gene_variant	MODIFIER	AMOTL1	485122	transcript	XM_542240.6	protein_coding	-1	c.*7781_*7782insGC
21	6107417	G	GGC	PASS	downstream_gene_variant	MODIFIER	AMOTL1	485122	transcript	XM_005633346.3	protein_coding	-1	c.*7781_*7782insGC
21	6107417	G	GGC	PASS	downstream_gene_variant	MODIFIER	AMOTL1	485122	transcript	XM_022407499.1	protein_coding	-1	c.*7781_*7782insGC
21	6107417	G	GGC	PASS	downstream_gene_variant	MODIFIER	AMOTL1	485122	transcript	XM_022407501.1	protein_coding	-1	c.*7781_*7782insGC
21	6107417	G	GGC	PASS	downstream_gene_variant	MODIFIER	AMOTL1	485122	transcript	XM_005633347.3	protein_coding	-1	c.*7781_*7782insGC
21	6107417	G	GGC	PASS	downstream_gene_variant	MODIFIER	AMOTL1	485122	transcript	XM_022407500.1	protein_coding	-1	c.*7781_*7782insGC
21	6107417	G	GGC	PASS	downstream_gene_variant	MODIFIER	AMOTL1	485122	transcript	XM_022407502.1	protein_coding	-1	c.*7781_*7782insGC
21	6107417	G	GGC	PASS	intergenic_region	MODIFIER	LOC106560210-AMOTL1	106560210-485122	intergenic_region	106560210-485122		-1	n.6107417_6107418insGC
21	17955242	AAAG	A	PASS	intron_variant	MODIFIER	TENM4	485166	transcript	XM_022407591.1	protein_coding	1	c.-423+135355_-423+135357delAAG
21	17955242	AAAG	A	PASS	intron_variant	MODIFIER	TENM4	485166	transcript	XM_022407596.1	protein_coding	1	c.-423+135355_-423+135357delAAG
21	17955242	AAAG	A	PASS	intron_variant	MODIFIER	TENM4	485166	transcript	XM_022407597.1	protein_coding	1	c.-423+135355_-423+135357delAAG
21	17955242	AAAG	A	PASS	intron_variant	MODIFIER	TENM4	485166	transcript	XM_022407598.1	protein_coding	1	c.-595+135355_-595+135357delAAG
21	17955242	AAAG	A	PASS	intron_variant	MODIFIER	TENM4	485166	transcript	XM_022407599.1	protein_coding	1	c.-423+135355_-423+135357delAAG
21	17955242	AAAG	A	PASS	intron_variant	MODIFIER	TENM4	485166	transcript	XM_022407600.1	protein_coding	1	c.-423+135355_-423+135357delAAG
21	17955242	AAAG	A	PASS	intron_variant	MODIFIER	TENM4	485166	transcript	XM_022407601.1	protein_coding	1	c.-423+135355_-423+135357delAAG
21	17955242	AAAG	A	PASS	intron_variant	MODIFIER	TENM4	485166	transcript	XM_022407602.1	protein_coding	1	c.-423+135355_-423+135357delAAG
21	17955242	AAAG	A	PASS	intron_variant	MODIFIER	TENM4	485166	transcript	XM_022407604.1	protein_coding	1	c.-423+135355_-423+135357delAAG
21	17955242	AAAG	A	PASS	intron_variant	MODIFIER	TENM4	485166	transcript	XM_022407592.1	protein_coding	1	c.-568+135355_-568+135357delAAG
21	28439979	C	CTTTTTTTTTTT	PASS	upstream_gene_variant	MODIFIER	UBQLN3	476826	transcript	XM_003433025.4	protein_coding	-1	c.-1376_-1375insTTTTTTTTTTT
21	28439979	C	CTTTTTTTTTTT	PASS	downstream_gene_variant	MODIFIER	UBQLNL	485274	transcript	XM_003433024.3	protein_coding	-1	c.*3003_*3004insTTTTTTTTTTT
21	28439979	C	CTTTTTTTTTTT	PASS	intergenic_region	MODIFIER	UBQLNL-UBQLN3	485274-476826	intergenic_region	485274-476826		-1	n.28439979_28439980insTTTTTTTTTTT
21	28439981	A	ATTTATTTATTTATTTATTTTTTTTAATGTGATTTTTTTTTATTGGTGTTCAATTT	PASS	upstream_gene_variant	MODIFIER	UBQLN3	476826	transcript	XM_003433025.4	protein_coding	-1	c.-1374_-1373insTTTATTTATTTATTTATTTTTTTTAATGTGATTTTTTTTTATTGGTGTTCAATTT
21	28439981	A	ATTTATTTATTTATTTATTTTTTTTAATGTGATTTTTTTTTATTGGTGTTCAATTT	PASS	downstream_gene_variant	MODIFIER	UBQLNL	485274	transcript	XM_003433024.3	protein_coding	-1	c.*3005_*3006insTTTATTTATTTATTTATTTTTTTTAATGTGATTTTTTTTTATTGGTGTTCAATTT
21	28439981	A	ATTTATTTATTTATTTATTTTTTTTAATGTGATTTTTTTTTATTGGTGTTCAATTT	PASS	intergenic_region	MODIFIER	UBQLNL-UBQLN3	485274-476826	intergenic_region	485274-476826		-1	n.28439981_28439982insTTTATTTATTTATTTATTTTTTTTAATGTGATTTTTTTTTATTGGTGTTCAATTT
21	32538493	GAA	G	PASS	intron_variant	MODIFIER	DENND5A	476844	transcript	XM_534048.6	protein_coding	1	c.113-6639_113-6638delTT
21	32538493	GAA	G	PASS	intron_variant	MODIFIER	DENND5A	476844	transcript	XM_005633656.3	protein_coding	1	c.113-7886_113-7885delTT
21	32538493	GAA	G	PASS	intron_variant	MODIFIER	DENND5A	476844	transcript	XM_022407829.1	protein_coding	1	c.113-6639_113-6638delTT
21	33430158	T	TA	PASS	downstream_gene_variant	MODIFIER	LOC102151314	102151314	transcript	102151314	pseudogene	-1	n.*165_*166insA
21	33430158	T	TA	PASS	intron_variant	MODIFIER	SBF2	476849	transcript	XM_014122592.2	protein_coding	1	c.55+30902_55+30903insT
21	33430158	T	TA	PASS	intron_variant	MODIFIER	SBF2	476849	transcript	XM_005633663.3	protein_coding	1	c.55+30902_55+30903insT
21	33430158	T	TA	PASS	intron_variant	MODIFIER	SBF2	476849	transcript	XM_022407837.1	protein_coding	1	c.55+30902_55+30903insT
21	33430158	T	TA	PASS	intron_variant	MODIFIER	SBF2	476849	transcript	XM_534052.6	protein_coding	1	c.55+30902_55+30903insT
21	40634055	CAG	C	PASS	upstream_gene_variant	MODIFIER	LOC102155886	102155886	transcript	XM_005633728.3	protein_coding	-1	c.-1174_-1173delCT
21	40634055	CAG	C	PASS	intergenic_region	MODIFIER	LOC102155886-SAA1	102155886-751814	intergenic_region	102155886-751814		-1	n.40634056_40634057delAG
22	11782	G	C	GATKstd	intergenic_region	MODIFIER	CHR_START-LOC106557545	CHR_START-106557545	intergenic_region	CHR_START-106557545		-1	n.11782G>C
22	559190	CTCCCTCTTTCTT	C	PASS	intron_variant	MODIFIER	INTS6	476905	transcript	XM_534109.7	protein_coding	1	c.-196+9866_-196+9877delTCCCTCTTTCTT
22	4610717	GCCGGAGCTGAATCCAGGTTT	G	PASS	intron_variant	MODIFIER	LRCH1	476919	transcript	XM_022408291.1	protein_coding	15	c.1424-6319_1424-6300delAAACCTGGATTCAGCTCCGG
22	4610717	GCCGGAGCTGAATCCAGGTTT	G	PASS	intron_variant	MODIFIER	LRCH1	476919	transcript	XM_022408292.1	protein_coding	15	c.1424-6319_1424-6300delAAACCTGGATTCAGCTCCGG
22	4610717	GCCGGAGCTGAATCCAGGTTT	G	PASS	intron_variant	MODIFIER	LRCH1	476919	transcript	XM_022408293.1	protein_coding	14	c.1319-6319_1319-6300delAAACCTGGATTCAGCTCCGG
22	12145716	G	A	GATKstd	intergenic_region	MODIFIER	LOC111091834-LOC100685986	111091834-100685986	intergenic_region	111091834-100685986		-1	n.12145716G>A
22	15389849	A	C	GATKstd	intergenic_region	MODIFIER	LOC102154343-DIAPH3	102154343-485474	intergenic_region	102154343-485474		-1	n.15389849A>C
22	15811460	G	T	GATKstd	intron_variant	MODIFIER	DIAPH3	485474	transcript	XM_542593.6	protein_coding	20	c.2362-14317C>A
22	15811460	G	T	GATKstd	intron_variant	MODIFIER	DIAPH3	485474	transcript	XM_005633952.3	protein_coding	16	c.1756-14317C>A
22	15811460	G	T	GATKstd	intron_variant	MODIFIER	DIAPH3	485474	transcript	XM_005633947.3	protein_coding	16	c.1786-14317C>A
22	15811460	G	T	GATKstd	intron_variant	MODIFIER	DIAPH3	485474	transcript	XM_022408011.1	protein_coding	17	c.1768-14317C>A
22	15811460	G	T	GATKstd	intron_variant	MODIFIER	DIAPH3	485474	transcript	XM_005633948.3	protein_coding	17	c.1786-14317C>A
22	15811460	G	T	GATKstd	intron_variant	MODIFIER	DIAPH3	485474	transcript	XM_005633951.3	protein_coding	17	c.1768-14317C>A
22	15811460	G	T	GATKstd	intron_variant	MODIFIER	DIAPH3	485474	transcript	XM_005633940.3	protein_coding	19	c.2329-14317C>A
22	15811460	G	T	GATKstd	intron_variant	MODIFIER	DIAPH3	485474	transcript	XR_002617482.1	pseudogene	20	n.2377-14317C>A
22	15811460	G	T	GATKstd	intron_variant	MODIFIER	DIAPH3	485474	transcript	XR_002617483.1	pseudogene	20	n.2377-14317C>A
22	15811460	G	T	GATKstd	intron_variant	MODIFIER	DIAPH3	485474	transcript	XM_005633945.3	protein_coding	20	c.2362-14317C>A
22	15811460	G	T	GATKstd	intron_variant	MODIFIER	DIAPH3	485474	transcript	XM_022408007.1	protein_coding	20	c.2362-14317C>A
22	15811460	G	T	GATKstd	intron_variant	MODIFIER	DIAPH3	485474	transcript	XM_022408008.1	protein_coding	20	c.2362-14317C>A
22	15811460	G	T	GATKstd	intron_variant	MODIFIER	DIAPH3	485474	transcript	XM_022408009.1	protein_coding	20	c.2362-14317C>A
22	15811460	G	T	GATKstd	intron_variant	MODIFIER	DIAPH3	485474	transcript	XR_002617484.1	pseudogene	20	n.2377-14317C>A
22	15811460	G	T	GATKstd	intron_variant	MODIFIER	DIAPH3	485474	transcript	XR_002617485.1	pseudogene	20	n.2377-14317C>A
22	15811460	G	T	GATKstd	intron_variant	MODIFIER	DIAPH3	485474	transcript	XM_022408010.1	protein_coding	20	c.2362-14317C>A
22	17523749	T	TAATAAATAGATGAAAAGTAAAAAAAAAAAAAAAAAAAAAAAAAAAAA	PASS	intergenic_region	MODIFIER	LOC100687102-LOC111091736	100687102-111091736	intergenic_region	100687102-111091736		-1	n.17523749_17523750insAATAAATAGATGAAAAGTAAAAAAAAAAAAAAAAAAAAAAAAAAAAA
22	21319416	A	T	GATKstd	intergenic_region	MODIFIER	LOC111091750-PCDH9	111091750-476942	intergenic_region	111091750-476942		-1	n.21319416A>T
22	21541609	A	G	GATKstd	intron_variant	MODIFIER	PCDH9	476942	transcript	XM_843846.5	protein_coding	4	c.3340+94621T>C
22	21541609	A	G	GATKstd	intron_variant	MODIFIER	PCDH9	476942	transcript	XM_005633954.3	protein_coding	3	c.3238+94621T>C
22	21541609	A	G	GATKstd	intron_variant	MODIFIER	PCDH9	476942	transcript	XM_005633955.3	protein_coding	3	c.3112+94621T>C
22	21541609	A	G	GATKstd	intron_variant	MODIFIER	PCDH9	476942	transcript	XM_003433053.4	protein_coding	4	c.3214+94621T>C
22	21541609	A	G	GATKstd	intron_variant	MODIFIER	PCDH9	476942	transcript	XM_022408012.1	protein_coding	4	c.3295+94621T>C
22	21541609	A	G	GATKstd	intron_variant	MODIFIER	PCDH9	476942	transcript	XM_022408013.1	protein_coding	4	c.3169+94621T>C
22	21552505	TTGGGTTAAACCCAAGCTCTTTACATGG	T	PASS	intron_variant	MODIFIER	PCDH9	476942	transcript	XM_843846.5	protein_coding	4	c.3340+83698_3340+83724delCCATGTAAAGAGCTTGGGTTTAACCCA
22	21552505	TTGGGTTAAACCCAAGCTCTTTACATGG	T	PASS	intron_variant	MODIFIER	PCDH9	476942	transcript	XM_005633954.3	protein_coding	3	c.3238+83698_3238+83724delCCATGTAAAGAGCTTGGGTTTAACCCA
22	21552505	TTGGGTTAAACCCAAGCTCTTTACATGG	T	PASS	intron_variant	MODIFIER	PCDH9	476942	transcript	XM_005633955.3	protein_coding	3	c.3112+83698_3112+83724delCCATGTAAAGAGCTTGGGTTTAACCCA
22	21552505	TTGGGTTAAACCCAAGCTCTTTACATGG	T	PASS	intron_variant	MODIFIER	PCDH9	476942	transcript	XM_003433053.4	protein_coding	4	c.3214+83698_3214+83724delCCATGTAAAGAGCTTGGGTTTAACCCA
22	21552505	TTGGGTTAAACCCAAGCTCTTTACATGG	T	PASS	intron_variant	MODIFIER	PCDH9	476942	transcript	XM_022408012.1	protein_coding	4	c.3295+83698_3295+83724delCCATGTAAAGAGCTTGGGTTTAACCCA
22	21552505	TTGGGTTAAACCCAAGCTCTTTACATGG	T	PASS	intron_variant	MODIFIER	PCDH9	476942	transcript	XM_022408013.1	protein_coding	4	c.3169+83698_3169+83724delCCATGTAAAGAGCTTGGGTTTAACCCA
22	21711500	C	T	GATKstd	intron_variant	MODIFIER	PCDH9	476942	transcript	XM_843846.5	protein_coding	3	c.3139-75069G>A
22	21711500	C	T	GATKstd	intron_variant	MODIFIER	PCDH9	476942	transcript	XM_005633954.3	protein_coding	2	c.3037-75069G>A
22	21711500	C	T	GATKstd	intron_variant	MODIFIER	PCDH9	476942	transcript	XM_005633955.3	protein_coding	2	c.3037-75195G>A
22	21711500	C	T	GATKstd	intron_variant	MODIFIER	PCDH9	476942	transcript	XM_003433053.4	protein_coding	3	c.3139-75195G>A
22	21711500	C	T	GATKstd	intron_variant	MODIFIER	PCDH9	476942	transcript	XM_022408012.1	protein_coding	3	c.3094-75069G>A
22	21711500	C	T	GATKstd	intron_variant	MODIFIER	PCDH9	476942	transcript	XM_022408013.1	protein_coding	3	c.3094-75195G>A
22	21711500	C	T	GATKstd	intron_variant	MODIFIER	PCDH9	476942	transcript	XM_022408014.1	protein_coding	3	c.3139-75069G>A
22	21711500	C	T	GATKstd	intron_variant	MODIFIER	PCDH9	476942	transcript	XM_022408015.1	protein_coding	3	c.3139-75195G>A
22	21853354	T	G	GATKstd	intron_variant	MODIFIER	PCDH9	476942	transcript	XM_843846.5	protein_coding	3	c.3138+31342A>C
22	21853354	T	G	GATKstd	intron_variant	MODIFIER	PCDH9	476942	transcript	XM_005633954.3	protein_coding	2	c.3037-216923A>C
22	21853354	T	G	GATKstd	intron_variant	MODIFIER	PCDH9	476942	transcript	XM_005633955.3	protein_coding	2	c.3037-217049A>C
22	21853354	T	G	GATKstd	intron_variant	MODIFIER	PCDH9	476942	transcript	XM_003433053.4	protein_coding	3	c.3138+31342A>C
22	21853354	T	G	GATKstd	intron_variant	MODIFIER	PCDH9	476942	transcript	XM_022408012.1	protein_coding	3	c.3093+31342A>C
22	21853354	T	G	GATKstd	intron_variant	MODIFIER	PCDH9	476942	transcript	XM_022408013.1	protein_coding	3	c.3093+31342A>C
22	21853354	T	G	GATKstd	intron_variant	MODIFIER	PCDH9	476942	transcript	XM_022408014.1	protein_coding	3	c.3138+31342A>C
22	21853354	T	G	GATKstd	intron_variant	MODIFIER	PCDH9	476942	transcript	XM_022408015.1	protein_coding	3	c.3138+31342A>C
22	21857944	T	C	GATKstd	intron_variant	MODIFIER	PCDH9	476942	transcript	XM_843846.5	protein_coding	3	c.3138+26752A>G
22	21857944	T	C	GATKstd	intron_variant	MODIFIER	PCDH9	476942	transcript	XM_005633954.3	protein_coding	2	c.3037-221513A>G
22	21857944	T	C	GATKstd	intron_variant	MODIFIER	PCDH9	476942	transcript	XM_005633955.3	protein_coding	2	c.3037-221639A>G
22	21857944	T	C	GATKstd	intron_variant	MODIFIER	PCDH9	476942	transcript	XM_003433053.4	protein_coding	3	c.3138+26752A>G
22	21857944	T	C	GATKstd	intron_variant	MODIFIER	PCDH9	476942	transcript	XM_022408012.1	protein_coding	3	c.3093+26752A>G
22	21857944	T	C	GATKstd	intron_variant	MODIFIER	PCDH9	476942	transcript	XM_022408013.1	protein_coding	3	c.3093+26752A>G
22	21857944	T	C	GATKstd	intron_variant	MODIFIER	PCDH9	476942	transcript	XM_022408014.1	protein_coding	3	c.3138+26752A>G
22	21857944	T	C	GATKstd	intron_variant	MODIFIER	PCDH9	476942	transcript	XM_022408015.1	protein_coding	3	c.3138+26752A>G
22	22076728	T	C	GATKstd	intron_variant	MODIFIER	PCDH9	476942	transcript	XM_843846.5	protein_coding	2	c.3036+131145A>G
22	22076728	T	C	GATKstd	intron_variant	MODIFIER	PCDH9	476942	transcript	XM_005633954.3	protein_coding	2	c.3036+131145A>G
22	22076728	T	C	GATKstd	intron_variant	MODIFIER	PCDH9	476942	transcript	XM_005633955.3	protein_coding	2	c.3036+131145A>G
22	22076728	T	C	GATKstd	intron_variant	MODIFIER	PCDH9	476942	transcript	XM_003433053.4	protein_coding	2	c.3036+131145A>G
22	22076728	T	C	GATKstd	intron_variant	MODIFIER	PCDH9	476942	transcript	XM_022408012.1	protein_coding	2	c.3036+131145A>G
22	22076728	T	C	GATKstd	intron_variant	MODIFIER	PCDH9	476942	transcript	XM_022408013.1	protein_coding	2	c.3036+131145A>G
22	22076728	T	C	GATKstd	intron_variant	MODIFIER	PCDH9	476942	transcript	XM_022408014.1	protein_coding	2	c.3036+131145A>G
22	22076728	T	C	GATKstd	intron_variant	MODIFIER	PCDH9	476942	transcript	XM_022408015.1	protein_coding	2	c.3036+131145A>G
22	22108774	A	G	GATKstd	intron_variant	MODIFIER	PCDH9	476942	transcript	XM_843846.5	protein_coding	2	c.3036+99099T>C
22	22108774	A	G	GATKstd	intron_variant	MODIFIER	PCDH9	476942	transcript	XM_005633954.3	protein_coding	2	c.3036+99099T>C
22	22108774	A	G	GATKstd	intron_variant	MODIFIER	PCDH9	476942	transcript	XM_005633955.3	protein_coding	2	c.3036+99099T>C
22	22108774	A	G	GATKstd	intron_variant	MODIFIER	PCDH9	476942	transcript	XM_003433053.4	protein_coding	2	c.3036+99099T>C
22	22108774	A	G	GATKstd	intron_variant	MODIFIER	PCDH9	476942	transcript	XM_022408012.1	protein_coding	2	c.3036+99099T>C
22	22108774	A	G	GATKstd	intron_variant	MODIFIER	PCDH9	476942	transcript	XM_022408013.1	protein_coding	2	c.3036+99099T>C
22	22108774	A	G	GATKstd	intron_variant	MODIFIER	PCDH9	476942	transcript	XM_022408014.1	protein_coding	2	c.3036+99099T>C
22	22108774	A	G	GATKstd	intron_variant	MODIFIER	PCDH9	476942	transcript	XM_022408015.1	protein_coding	2	c.3036+99099T>C
22	22144706	C	T	GATKstd	intron_variant	MODIFIER	PCDH9	476942	transcript	XM_843846.5	protein_coding	2	c.3036+63167G>A
22	22144706	C	T	GATKstd	intron_variant	MODIFIER	PCDH9	476942	transcript	XM_005633954.3	protein_coding	2	c.3036+63167G>A
22	22144706	C	T	GATKstd	intron_variant	MODIFIER	PCDH9	476942	transcript	XM_005633955.3	protein_coding	2	c.3036+63167G>A
22	22144706	C	T	GATKstd	intron_variant	MODIFIER	PCDH9	476942	transcript	XM_003433053.4	protein_coding	2	c.3036+63167G>A
22	22144706	C	T	GATKstd	intron_variant	MODIFIER	PCDH9	476942	transcript	XM_022408012.1	protein_coding	2	c.3036+63167G>A
22	22144706	C	T	GATKstd	intron_variant	MODIFIER	PCDH9	476942	transcript	XM_022408013.1	protein_coding	2	c.3036+63167G>A
22	22144706	C	T	GATKstd	intron_variant	MODIFIER	PCDH9	476942	transcript	XM_022408014.1	protein_coding	2	c.3036+63167G>A
22	22144706	C	T	GATKstd	intron_variant	MODIFIER	PCDH9	476942	transcript	XM_022408015.1	protein_coding	2	c.3036+63167G>A
22	22162275	G	A	PASS	intron_variant	MODIFIER	PCDH9	476942	transcript	XM_843846.5	protein_coding	2	c.3036+45598C>T
22	22162275	G	A	PASS	intron_variant	MODIFIER	PCDH9	476942	transcript	XM_005633954.3	protein_coding	2	c.3036+45598C>T
22	22162275	G	A	PASS	intron_variant	MODIFIER	PCDH9	476942	transcript	XM_005633955.3	protein_coding	2	c.3036+45598C>T
22	22162275	G	A	PASS	intron_variant	MODIFIER	PCDH9	476942	transcript	XM_003433053.4	protein_coding	2	c.3036+45598C>T
22	22162275	G	A	PASS	intron_variant	MODIFIER	PCDH9	476942	transcript	XM_022408012.1	protein_coding	2	c.3036+45598C>T
22	22162275	G	A	PASS	intron_variant	MODIFIER	PCDH9	476942	transcript	XM_022408013.1	protein_coding	2	c.3036+45598C>T
22	22162275	G	A	PASS	intron_variant	MODIFIER	PCDH9	476942	transcript	XM_022408014.1	protein_coding	2	c.3036+45598C>T
22	22162275	G	A	PASS	intron_variant	MODIFIER	PCDH9	476942	transcript	XM_022408015.1	protein_coding	2	c.3036+45598C>T
22	22419255	A	T	GATKstd	intergenic_region	MODIFIER	LOC111091645-LOC485484	111091645-485484	intergenic_region	111091645-485484		-1	n.22419255A>T
22	22558549	G	A	GATKstd	intergenic_region	MODIFIER	LOC485484-LOC100683102	485484-100683102	intergenic_region	485484-100683102		-1	n.22558549G>A
22	22653296	T	A	GATKstd	intergenic_region	MODIFIER	LOC485484-LOC100683102	485484-100683102	intergenic_region	485484-100683102		-1	n.22653296T>A
22	25022780	C	T	GATKstd	intron_variant	MODIFIER	LOC111091779	111091779	transcript	XR_002617796.1	pseudogene	1	n.94-154G>A
22	26726078	GAGGAGGAGGAGGAGGAGGAGA	G	PASS	intergenic_region	MODIFIER	LOC102156817-MZT1	102156817-100683696	intergenic_region	102156817-100683696		-1	n.26726079_26726099delAGGAGGAGGAGGAGGAGGAGA
22	34421304	C	T	GATKstd	intron_variant	MODIFIER	LOC111091669	111091669	transcript	XR_002617577.1	pseudogene	6	n.1135-26726G>A
22	42411892	A	T	GATKstd	intergenic_region	MODIFIER	LOC111091677-LOC111091678	111091677-111091678	intergenic_region	111091677-111091678		-1	n.42411892A>T
22	49635811	T	C	PASS	intron_variant	MODIFIER	CLYBL	476974	transcript	XM_005634046.3	protein_coding	1	c.89+26682T>C
22	49635811	T	C	PASS	intron_variant	MODIFIER	LOC100687412	100687412	transcript	100687412	pseudogene	1	n.931-1271T>C
22	49635811	T	C	PASS	intron_variant	MODIFIER	CLYBL	476974	transcript	XM_014106323.2	protein_coding	1	c.89+26682T>C
22	49635811	T	C	PASS	intron_variant	MODIFIER	CLYBL	476974	transcript	XM_005634047.3	protein_coding	1	c.89+26682T>C
22	49635811	T	C	PASS	intron_variant	MODIFIER	CLYBL	476974	transcript	XM_022408122.1	protein_coding	1	c.89+26682T>C
22	49635811	T	C	PASS	intron_variant	MODIFIER	CLYBL	476974	transcript	XM_022408121.1	protein_coding	1	c.89+26682T>C
22	55794626	C	CCCCCCCCCA	PASS	intergenic_region	MODIFIER	LOC111091708-LOC111091709	111091708-111091709	intergenic_region	111091708-111091709		-1	n.55794626_55794627insCCCCCCCCA
22	58973443	A	AG	PASS	intergenic_region	MODIFIER	ING1-LOC100682891	476984-100682891	intergenic_region	476984-100682891		-1	n.58973443_58973444insG
23	11324206	G	GAAGTTTAGTTGTTTTTTTTTTTTTTTTTTTTTTTTTTTTTTTTTTT	PASS	intron_variant	MODIFIER	TRAK1	485610	transcript	XM_014106586.2	protein_coding	2	c.287-13668_287-13667insAAGTTTAGTTGTTTTTTTTTTTTTTTTTTTTTTTTTTTTTTTTTTT
23	11324206	G	GAAGTTTAGTTGTTTTTTTTTTTTTTTTTTTTTTTTTTTTTTTTTTT	PASS	intron_variant	MODIFIER	TRAK1	485610	transcript	XM_014106589.1	protein_coding	3	c.-26-13668_-26-13667insAAGTTTAGTTGTTTTTTTTTTTTTTTTTTTTTTTTTTTTTTTTTTT
23	11324206	G	GAAGTTTAGTTGTTTTTTTTTTTTTTTTTTTTTTTTTTTTTTTTTTT	PASS	intron_variant	MODIFIER	TRAK1	485610	transcript	XM_022408512.1	protein_coding	2	c.-26-13668_-26-13667insAAGTTTAGTTGTTTTTTTTTTTTTTTTTTTTTTTTTTTTTTTTTTT
23	11324206	G	GAAGTTTAGTTGTTTTTTTTTTTTTTTTTTTTTTTTTTTTTTTTTTT	PASS	intron_variant	MODIFIER	TRAK1	485610	transcript	XM_542729.6	protein_coding	2	c.287-13668_287-13667insAAGTTTAGTTGTTTTTTTTTTTTTTTTTTTTTTTTTTTTTTTTTTT
23	11324206	G	GAAGTTTAGTTGTTTTTTTTTTTTTTTTTTTTTTTTTTTTTTTTTTT	PASS	intron_variant	MODIFIER	TRAK1	485610	transcript	XM_005634283.3	protein_coding	2	c.287-13668_287-13667insAAGTTTAGTTGTTTTTTTTTTTTTTTTTTTTTTTTTTTTTTTTTTT
23	11324206	G	GAAGTTTAGTTGTTTTTTTTTTTTTTTTTTTTTTTTTTTTTTTTTTT	PASS	intron_variant	MODIFIER	TRAK1	485610	transcript	XM_022408511.1	protein_coding	2	c.287-13668_287-13667insAAGTTTAGTTGTTTTTTTTTTTTTTTTTTTTTTTTTTTTTTTTTTT
23	11324206	G	GAAGTTTAGTTGTTTTTTTTTTTTTTTTTTTTTTTTTTTTTTTTTTT	PASS	intron_variant	MODIFIER	TRAK1	485610	transcript	XM_014106590.2	protein_coding	1	c.-27+9242_-27+9243insAAGTTTAGTTGTTTTTTTTTTTTTTTTTTTTTTTTTTTTTTTTTTT
23	11324206	G	GAAGTTTAGTTGTTTTTTTTTTTTTTTTTTTTTTTTTTTTTTTTTTT	PASS	intron_variant	MODIFIER	TRAK1	485610	transcript	XM_014106588.2	protein_coding	1	c.64+9060_64+9061insAAGTTTAGTTGTTTTTTTTTTTTTTTTTTTTTTTTTTTTTTTTTTT
23	11324206	G	GAAGTTTAGTTGTTTTTTTTTTTTTTTTTTTTTTTTTTTTTTTTTTT	PASS	intron_variant	MODIFIER	TRAK1	485610	transcript	XM_022408509.1	protein_coding	1	c.64+9060_64+9061insAAGTTTAGTTGTTTTTTTTTTTTTTTTTTTTTTTTTTTTTTTTTTT
23	11324206	G	GAAGTTTAGTTGTTTTTTTTTTTTTTTTTTTTTTTTTTTTTTTTTTT	PASS	intron_variant	MODIFIER	TRAK1	485610	transcript	XM_022408510.1	protein_coding	1	c.64+9060_64+9061insAAGTTTAGTTGTTTTTTTTTTTTTTTTTTTTTTTTTTTTTTTTTTT
23	11324206	G	GAAGTTTAGTTGTTTTTTTTTTTTTTTTTTTTTTTTTTTTTTTTTTT	PASS	intron_variant	MODIFIER	TRAK1	485610	transcript	XM_022408508.1	protein_coding	1	c.-27+7174_-27+7175insAAGTTTAGTTGTTTTTTTTTTTTTTTTTTTTTTTTTTTTTTTTTTT
23	11324206	G	GAAGTTTAGTTGTTTTTTTTTTTTTTTTTTTTTTTTTTTTTTTTTTT	PASS	intron_variant	MODIFIER	TRAK1	485610	transcript	XM_014106587.2	protein_coding	1	c.112+622_112+623insAAGTTTAGTTGTTTTTTTTTTTTTTTTTTTTTTTTTTTTTTTTTTT
23	11324206	G	GAAGTTTAGTTGTTTTTTTTTTTTTTTTTTTTTTTTTTTTTTTTTTT	PASS	intron_variant	MODIFIER	TRAK1	485610	transcript	XM_856188.5	protein_coding	1	c.112+622_112+623insAAGTTTAGTTGTTTTTTTTTTTTTTTTTTTTTTTTTTTTTTTTTTT
23	27259993	G	A	PASS	intron_variant	MODIFIER	SH3BP5	485657	transcript	XM_005634401.3	protein_coding	1	c.30+1293G>A
23	34719883	A	AATAG	PASS	intron_variant	MODIFIER	CEP70	477084	transcript	XM_005634494.3	protein_coding	10	c.996+4475_996+4476insCTAT
23	34719883	A	AATAG	PASS	intron_variant	MODIFIER	CEP70	477084	transcript	XR_002618225.1	pseudogene	10	n.1141+4475_1141+4476insCTAT
23	34719883	A	AATAG	PASS	intron_variant	MODIFIER	CEP70	477084	transcript	XM_022408683.1	protein_coding	10	c.996+4475_996+4476insCTAT
23	34719883	A	AATAG	PASS	intron_variant	MODIFIER	CEP70	477084	transcript	XR_002618226.1	pseudogene	10	n.1141+4475_1141+4476insCTAT
23	34719883	A	AATAG	PASS	intron_variant	MODIFIER	CEP70	477084	transcript	XM_005634496.3	protein_coding	10	c.996+4475_996+4476insCTAT
23	34719883	A	AATAG	PASS	intron_variant	MODIFIER	CEP70	477084	transcript	XM_022408684.1	protein_coding	10	c.996+4475_996+4476insCTAT
23	34719883	A	AATAG	PASS	intron_variant	MODIFIER	CEP70	477084	transcript	XM_005634495.3	protein_coding	10	c.996+4475_996+4476insCTAT
23	34751535	T	A	GATKstd	downstream_gene_variant	MODIFIER	LOC102152404	102152404	transcript	102152404	pseudogene	-1	n.*4591A>T
23	34751535	T	A	GATKstd	intron_variant	MODIFIER	CEP70	477084	transcript	XM_005634494.3	protein_coding	4	c.412-3622A>T
23	34751535	T	A	GATKstd	intron_variant	MODIFIER	CEP70	477084	transcript	XR_002618225.1	pseudogene	4	n.557-3622A>T
23	34751535	T	A	GATKstd	intron_variant	MODIFIER	CEP70	477084	transcript	XM_022408683.1	protein_coding	4	c.412-3622A>T
23	34751535	T	A	GATKstd	intron_variant	MODIFIER	CEP70	477084	transcript	XR_002618226.1	pseudogene	4	n.557-3622A>T
23	34751535	T	A	GATKstd	intron_variant	MODIFIER	CEP70	477084	transcript	XM_005634496.3	protein_coding	4	c.412-3622A>T
23	34751535	T	A	GATKstd	intron_variant	MODIFIER	CEP70	477084	transcript	XM_022408684.1	protein_coding	4	c.412-3622A>T
23	34751535	T	A	GATKstd	intron_variant	MODIFIER	CEP70	477084	transcript	XM_005634495.3	protein_coding	4	c.412-3622A>T
24	1953920	ACGC	A	PASS	intron_variant	MODIFIER	AR	403588	transcript	NM_001003053.1	protein_coding	3	c.*868-2317085_*868-2317083delGCC		WARNING_TRANSCRIPT_MULTIPLE_STOP_CODONS&INFO_REALIGN_3_PRIME
24	1953920	ACGC	A	PASS	non_coding_transcript_exon_variant	MODIFIER	LOC111092249	111092249	transcript	111092249	pseudogene	2	n.1227_1229delGCC		INFO_REALIGN_3_PRIME
24	5374289	G	A	GATKstd	intron_variant	MODIFIER	RRBP1	403809	transcript	NM_001003179.1	protein_coding	7	c.2673+766G>A
24	6275531	C	T	PASS	intron_variant	MODIFIER	KIF16B	485759	transcript	XM_014106960.2	protein_coding	1	c.83+13982C>T
24	6275531	C	T	PASS	intron_variant	MODIFIER	KIF16B	485759	transcript	XM_022409153.1	protein_coding	1	c.-35+14628C>T
24	6275531	C	T	PASS	intron_variant	MODIFIER	KIF16B	485759	transcript	XM_022409155.1	protein_coding	1	c.83+13982C>T
24	6275531	C	T	PASS	intron_variant	MODIFIER	KIF16B	485759	transcript	XM_022409156.1	protein_coding	1	c.83+13982C>T
24	6275531	C	T	PASS	intron_variant	MODIFIER	KIF16B	485759	transcript	XM_014106961.2	protein_coding	1	c.83+13982C>T
24	6275531	C	T	PASS	intron_variant	MODIFIER	KIF16B	485759	transcript	XM_022409158.1	protein_coding	1	c.83+13982C>T
24	6275531	C	T	PASS	intron_variant	MODIFIER	KIF16B	485759	transcript	XM_022409157.1	protein_coding	1	c.83+13982C>T
24	6275531	C	T	PASS	intron_variant	MODIFIER	KIF16B	485759	transcript	XR_002618608.1	pseudogene	1	n.102+13982C>T
24	6275531	C	T	PASS	intron_variant	MODIFIER	KIF16B	485759	transcript	XR_002618609.1	pseudogene	1	n.102+13982C>T
24	6275531	C	T	PASS	intron_variant	MODIFIER	KIF16B	485759	transcript	XM_022409159.1	protein_coding	1	c.83+13982C>T
24	6275531	C	T	PASS	intron_variant	MODIFIER	KIF16B	485759	transcript	XM_022409160.1	protein_coding	1	c.83+13982C>T
24	6275531	C	T	PASS	intron_variant	MODIFIER	KIF16B	485759	transcript	XM_022409161.1	protein_coding	1	c.83+13982C>T
24	6275531	C	T	PASS	intron_variant	MODIFIER	KIF16B	485759	transcript	XM_014106962.2	protein_coding	1	c.83+13982C>T
24	6275531	C	T	PASS	intron_variant	MODIFIER	KIF16B	485759	transcript	XM_022409162.1	protein_coding	1	c.83+13982C>T
24	6275531	C	T	PASS	intron_variant	MODIFIER	KIF16B	485759	transcript	XM_005634767.3	protein_coding	1	c.83+13982C>T
24	6275531	C	T	PASS	intron_variant	MODIFIER	KIF16B	485759	transcript	XM_005634766.3	protein_coding	1	c.47+13415C>T
24	6275540	C	T	GATKstd	intron_variant	MODIFIER	KIF16B	485759	transcript	XM_014106960.2	protein_coding	1	c.83+13991C>T
24	6275540	C	T	GATKstd	intron_variant	MODIFIER	KIF16B	485759	transcript	XM_022409153.1	protein_coding	1	c.-35+14637C>T
24	6275540	C	T	GATKstd	intron_variant	MODIFIER	KIF16B	485759	transcript	XM_022409155.1	protein_coding	1	c.83+13991C>T
24	6275540	C	T	GATKstd	intron_variant	MODIFIER	KIF16B	485759	transcript	XM_022409156.1	protein_coding	1	c.83+13991C>T
24	6275540	C	T	GATKstd	intron_variant	MODIFIER	KIF16B	485759	transcript	XM_014106961.2	protein_coding	1	c.83+13991C>T
24	6275540	C	T	GATKstd	intron_variant	MODIFIER	KIF16B	485759	transcript	XM_022409158.1	protein_coding	1	c.83+13991C>T
24	6275540	C	T	GATKstd	intron_variant	MODIFIER	KIF16B	485759	transcript	XM_022409157.1	protein_coding	1	c.83+13991C>T
24	6275540	C	T	GATKstd	intron_variant	MODIFIER	KIF16B	485759	transcript	XR_002618608.1	pseudogene	1	n.102+13991C>T
24	6275540	C	T	GATKstd	intron_variant	MODIFIER	KIF16B	485759	transcript	XR_002618609.1	pseudogene	1	n.102+13991C>T
24	6275540	C	T	GATKstd	intron_variant	MODIFIER	KIF16B	485759	transcript	XM_022409159.1	protein_coding	1	c.83+13991C>T
24	6275540	C	T	GATKstd	intron_variant	MODIFIER	KIF16B	485759	transcript	XM_022409160.1	protein_coding	1	c.83+13991C>T
24	6275540	C	T	GATKstd	intron_variant	MODIFIER	KIF16B	485759	transcript	XM_022409161.1	protein_coding	1	c.83+13991C>T
24	6275540	C	T	GATKstd	intron_variant	MODIFIER	KIF16B	485759	transcript	XM_014106962.2	protein_coding	1	c.83+13991C>T
24	6275540	C	T	GATKstd	intron_variant	MODIFIER	KIF16B	485759	transcript	XM_022409162.1	protein_coding	1	c.83+13991C>T
24	6275540	C	T	GATKstd	intron_variant	MODIFIER	KIF16B	485759	transcript	XM_005634767.3	protein_coding	1	c.83+13991C>T
24	6275540	C	T	GATKstd	intron_variant	MODIFIER	KIF16B	485759	transcript	XM_005634766.3	protein_coding	1	c.47+13424C>T
24	10452524	G	A	GATKstd	upstream_gene_variant	MODIFIER	LOC106557670	106557670	transcript	XR_001314346.2	pseudogene	-1	n.-1916C>T
24	10452524	G	A	GATKstd	intergenic_region	MODIFIER	LOC106557670-BTBD3	106557670-477154	intergenic_region	106557670-477154		-1	n.10452524G>A
24	16345387	T	TGC	PASS	intergenic_region	MODIFIER	LOC111092066-PROKR2	111092066-485779	intergenic_region	111092066-485779		-1	n.16345387_16345388insGC
24	19136353	C	G	PASS	upstream_gene_variant	MODIFIER	SIRPA	609452	transcript	XM_014106991.2	protein_coding	-1	c.-901G>C
24	19136353	C	G	PASS	upstream_gene_variant	MODIFIER	SIRPA	609452	transcript	XM_014106992.2	protein_coding	-1	c.-901G>C
24	19136353	C	G	PASS	intron_variant	MODIFIER	SIRPA	609452	transcript	XM_005634881.3	protein_coding	1	c.-10+168G>C
24	19136353	C	G	PASS	intron_variant	MODIFIER	LOC102156897	102156897	transcript	XR_001314385.2	pseudogene	1	n.105+866C>G
24	21725792	C	CTCCCCGGCCGCACCCGAGCCCTCGTGCGCCGCCGCTGCCGCCGCCACGCGCCCCCCGCCGCCGCCGCTGCCCCAGCCCCACGCCGCCGCCGCCCGCCCCGCCCGGAGG	PASS	upstream_gene_variant	MODIFIER	ASXL1	100688017	transcript	XM_005634922.2	protein_coding	-1	c.-561_-560insTCCCCGGCCGCACCCGAGCCCTCGTGCGCCGCCGCTGCCGCCGCCACGCGCCCCCCGCCGCCGCCGCTGCCCCAGCCCCACGCCGCCGCCGCCCGCCCCGCCCGGAGG
24	21725792	C	CTCCCCGGCCGCACCCGAGCCCTCGTGCGCCGCCGCTGCCGCCGCCACGCGCCCCCCGCCGCCGCCGCTGCCCCAGCCCCACGCCGCCGCCGCCCGCCCCGCCCGGAGG	PASS	upstream_gene_variant	MODIFIER	ASXL1	100688017	transcript	XM_005634924.2	protein_coding	-1	c.-561_-560insTCCCCGGCCGCACCCGAGCCCTCGTGCGCCGCCGCTGCCGCCGCCACGCGCCCCCCGCCGCCGCCGCTGCCCCAGCCCCACGCCGCCGCCGCCCGCCCCGCCCGGAGG
24	21725792	C	CTCCCCGGCCGCACCCGAGCCCTCGTGCGCCGCCGCTGCCGCCGCCACGCGCCCCCCGCCGCCGCCGCTGCCCCAGCCCCACGCCGCCGCCGCCCGCCCCGCCCGGAGG	PASS	intron_variant	MODIFIER	ASXL1	100688017	transcript	XM_005634923.3	protein_coding	1	c.111+527_111+528insTCCCCGGCCGCACCCGAGCCCTCGTGCGCCGCCGCTGCCGCCGCCACGCGCCCCCCGCCGCCGCCGCTGCCCCAGCCCCACGCCGCCGCCGCCCGCCCCGCCCGGAGG
24	29571929	G	C	GATKstd	intron_variant	MODIFIER	CHD6	477230	transcript	XM_014107014.2	protein_coding	2	c.-24+20529C>G
24	29571929	G	C	GATKstd	intron_variant	MODIFIER	CHD6	477230	transcript	XM_005635070.3	protein_coding	2	c.-134+20529C>G
24	29571929	G	C	GATKstd	intron_variant	MODIFIER	CHD6	477230	transcript	XM_014107015.2	protein_coding	1	c.-23-25469C>G
24	29571929	G	C	GATKstd	intron_variant	MODIFIER	CHD6	477230	transcript	XM_014107017.2	protein_coding	2	c.-24+20529C>G
24	32831481	A	G	GATKstd	upstream_gene_variant	MODIFIER	WFDC8	477245	transcript	XM_022409264.1	protein_coding	-1	c.-2542T>C
24	32831481	A	G	GATKstd	intergenic_region	MODIFIER	WFDC8-LOC100685603	477245-100685603	intergenic_region	477245-100685603		-1	n.32831481A>G
24	32835429	C	T	PASS	downstream_gene_variant	MODIFIER	LOC100685603	100685603	transcript	XM_014106868.2	protein_coding	-1	c.*2996G>A
24	32835429	C	T	PASS	intergenic_region	MODIFIER	WFDC8-LOC100685603	477245-100685603	intergenic_region	477245-100685603		-1	n.32835429C>T
24	45442066	T	G	PASS	intron_variant	MODIFIER	AR	403588_circ	transcript	NM_001003053.1_circ	protein_coding	3	c.869-6527720T>G		WARNING_TRANSCRIPT_MULTIPLE_STOP_CODONS
25	45539556	G	A	GATKstd	intergenic_region	MODIFIER	LOC111092412-ARL4C	111092412-100685179	intergenic_region	111092412-100685179		-1	n.45539556G>A
25	45539557	G	A	GATKstd	intergenic_region	MODIFIER	LOC111092412-ARL4C	111092412-100685179	intergenic_region	111092412-100685179		-1	n.45539557G>A
25	48706172	T	C	PASS	downstream_gene_variant	MODIFIER	HES6	607298	transcript	XM_843923.3	protein_coding	-1	c.*5156A>G
25	48706172	T	C	PASS	intergenic_region	MODIFIER	LOC111092444-HES6	111092444-607298	intergenic_region	111092444-607298		-1	n.48706172T>C
25	49969552	CGGGGGCCCGGGGTGCACGCGGACCTCGCCGCCCCAGGGCGCAGGGCAGGGCTCCCCCACCCTGACCCCATCCTCCCGGCCGGGAT	C	PASS	upstream_gene_variant	MODIFIER	NDUFA10	608244	transcript	XM_022409746.1	protein_coding	-1	c.-761_-677delATCCCGGCCGGGAGGATGGGGTCAGGGTGGGGGAGCCCTGCCCTGCGCCCTGGGGCGGCGAGGTCCGCGTGCACCCCGGGCCCCC
25	49969552	CGGGGGCCCGGGGTGCACGCGGACCTCGCCGCCCCAGGGCGCAGGGCAGGGCTCCCCCACCCTGACCCCATCCTCCCGGCCGGGAT	C	PASS	upstream_gene_variant	MODIFIER	NDUFA10	608244	transcript	XM_845210.6	protein_coding	-1	c.-761_-677delATCCCGGCCGGGAGGATGGGGTCAGGGTGGGGGAGCCCTGCCCTGCGCCCTGGGGCGGCGAGGTCCGCGTGCACCCCGGGCCCCC
25	49969552	CGGGGGCCCGGGGTGCACGCGGACCTCGCCGCCCCAGGGCGCAGGGCAGGGCTCCCCCACCCTGACCCCATCCTCCCGGCCGGGAT	C	PASS	intergenic_region	MODIFIER	NDUFA10-LOC608253	608244-608253	intergenic_region	608244-608253		-1	n.49969553_49969637delGGGGGCCCGGGGTGCACGCGGACCTCGCCGCCCCAGGGCGCAGGGCAGGGCTCCCCCACCCTGACCCCATCCTCCCGGCCGGGAT
25	50953798	G	A	GATKstd	intergenic_region	MODIFIER	LOC102152258-LOC102155391	102152258-102155391	intergenic_region	102152258-102155391		-1	n.50953798G>A
25	51573889	T	A	PASS	upstream_gene_variant	MODIFIER	LOC102151574	102151574	transcript	XM_005635987.3	protein_coding	-1	c.-4909T>A
25	51573889	T	A	PASS	upstream_gene_variant	MODIFIER	LOC102151574	102151574	transcript	XM_014107709.2	protein_coding	-1	c.-4909T>A
25	51573889	T	A	PASS	intron_variant	MODIFIER	D2HGDH	609641	transcript	XM_005635985.3	protein_coding	8	c.905-2006T>A
25	51573889	T	A	PASS	intron_variant	MODIFIER	D2HGDH	609641	transcript	XM_005635986.3	protein_coding	7	c.761-2006T>A
26	5025252	A	T	GATKstd	downstream_gene_variant	MODIFIER	LOC100688271	100688271	transcript	100688271	pseudogene	-1	n.*2038T>A
26	5025252	A	T	GATKstd	intergenic_region	MODIFIER	UBC-LOC100688271	610457-100688271	intergenic_region	610457-100688271		-1	n.5025252A>T
26	12575182	A	G	GATKstd	intergenic_region	MODIFIER	LOC102152704-MED13L	102152704-477496	intergenic_region	102152704-477496		-1	n.12575182A>G
26	24629355	G	C	PASS	upstream_gene_variant	MODIFIER	DEPDC5	477546	transcript	XM_005636490.2	protein_coding	-1	c.-1015G>C
26	24629355	G	C	PASS	upstream_gene_variant	MODIFIER	DEPDC5	477546	transcript	XM_014108007.2	protein_coding	-1	c.-1015G>C
26	24629355	G	C	PASS	upstream_gene_variant	MODIFIER	DEPDC5	477546	transcript	XM_014108008.2	protein_coding	-1	c.-1015G>C
26	24629355	G	C	PASS	upstream_gene_variant	MODIFIER	DEPDC5	477546	transcript	XM_005636491.3	protein_coding	-1	c.-1015G>C
26	24629355	G	C	PASS	upstream_gene_variant	MODIFIER	DEPDC5	477546	transcript	XM_014108000.2	protein_coding	-1	c.-1015G>C
26	24629355	G	C	PASS	upstream_gene_variant	MODIFIER	DEPDC5	477546	transcript	XM_014108001.2	protein_coding	-1	c.-1015G>C
26	24629355	G	C	PASS	upstream_gene_variant	MODIFIER	DEPDC5	477546	transcript	XM_014108002.2	protein_coding	-1	c.-1015G>C
26	24629355	G	C	PASS	upstream_gene_variant	MODIFIER	DEPDC5	477546	transcript	XM_014108003.2	protein_coding	-1	c.-1015G>C
26	24629355	G	C	PASS	upstream_gene_variant	MODIFIER	DEPDC5	477546	transcript	XM_014108004.2	protein_coding	-1	c.-1015G>C
26	24629355	G	C	PASS	upstream_gene_variant	MODIFIER	DEPDC5	477546	transcript	XM_014108006.2	protein_coding	-1	c.-1015G>C
26	24629355	G	C	PASS	upstream_gene_variant	MODIFIER	DEPDC5	477546	transcript	XM_022410191.1	protein_coding	-1	c.-1015G>C
26	24629355	G	C	PASS	intergenic_region	MODIFIER	PRR14L-DEPDC5	477545-477546	intergenic_region	477545-477546		-1	n.24629355G>C
26	30067678	T	TTTC	PASS	intron_variant	MODIFIER	DGCR2	486428	transcript	XM_014108194.2	protein_coding	1	c.79+13484_79+13485insTTC
26	30067678	T	TTTC	PASS	intron_variant	MODIFIER	DGCR2	486428	transcript	XM_022410623.1	protein_coding	2	c.-97+15320_-97+15321insTTC
26	30067678	T	TTTC	PASS	intron_variant	MODIFIER	DGCR2	486428	transcript	XM_022410624.1	protein_coding	1	c.-97+15948_-97+15949insTTC
26	30067678	T	TTTC	PASS	intron_variant	MODIFIER	DGCR2	486428	transcript	XM_005636598.2	protein_coding	1	c.79+13484_79+13485insTTC
26	30067678	T	TTTC	PASS	intron_variant	MODIFIER	DGCR2	486428	transcript	XM_022410621.1	protein_coding	1	c.-97+13484_-97+13485insTTC
26	30067678	T	TTTC	PASS	intron_variant	MODIFIER	DGCR2	486428	transcript	XM_003433440.3	protein_coding	1	c.79+13484_79+13485insTTC
26	30067678	T	TTTC	PASS	intron_variant	MODIFIER	DGCR2	486428	transcript	XM_005636599.2	protein_coding	1	c.79+13484_79+13485insTTC
26	30067678	T	TTTC	PASS	intron_variant	MODIFIER	DGCR2	486428	transcript	XM_005636600.2	protein_coding	1	c.79+13484_79+13485insTTC
26	30067678	T	TTTC	PASS	intron_variant	MODIFIER	DGCR2	486428	transcript	XM_543554.5	protein_coding	1	c.79+13484_79+13485insTTC
26	30067691	C	CTT	PASS	intron_variant	MODIFIER	DGCR2	486428	transcript	XM_014108194.2	protein_coding	1	c.79+13497_79+13498insTT
26	30067691	C	CTT	PASS	intron_variant	MODIFIER	DGCR2	486428	transcript	XM_022410623.1	protein_coding	2	c.-97+15333_-97+15334insTT
26	30067691	C	CTT	PASS	intron_variant	MODIFIER	DGCR2	486428	transcript	XM_022410624.1	protein_coding	1	c.-97+15961_-97+15962insTT
26	30067691	C	CTT	PASS	intron_variant	MODIFIER	DGCR2	486428	transcript	XM_005636598.2	protein_coding	1	c.79+13497_79+13498insTT
26	30067691	C	CTT	PASS	intron_variant	MODIFIER	DGCR2	486428	transcript	XM_022410621.1	protein_coding	1	c.-97+13497_-97+13498insTT
26	30067691	C	CTT	PASS	intron_variant	MODIFIER	DGCR2	486428	transcript	XM_003433440.3	protein_coding	1	c.79+13497_79+13498insTT
26	30067691	C	CTT	PASS	intron_variant	MODIFIER	DGCR2	486428	transcript	XM_005636599.2	protein_coding	1	c.79+13497_79+13498insTT
26	30067691	C	CTT	PASS	intron_variant	MODIFIER	DGCR2	486428	transcript	XM_005636600.2	protein_coding	1	c.79+13497_79+13498insTT
26	30067691	C	CTT	PASS	intron_variant	MODIFIER	DGCR2	486428	transcript	XM_543554.5	protein_coding	1	c.79+13497_79+13498insTT
26	31588811	G	C	GATKstd	intergenic_region	MODIFIER	LOC608785-LOC111092548	608785-111092548	intergenic_region	608785-111092548		-1	n.31588811G>C
26	31588813	A	C	GATKstd	intergenic_region	MODIFIER	LOC608785-LOC111092548	608785-111092548	intergenic_region	608785-111092548		-1	n.31588813A>C
26	32070140	G	A	GATKstd	intergenic_region	MODIFIER	LOC111092673-LOC111092658	111092673-111092658	intergenic_region	111092673-111092658		-1	n.32070140G>A
26	32773803	C	T	PASS	intergenic_region	MODIFIER	LOC111092511-LOC100686148	111092511-100686148	intergenic_region	111092511-100686148		-1	n.32773803C>T
26	37826122	A	G	GATKstd	intergenic_region	MODIFIER	LOC111092533-PTEN	111092533-403832	intergenic_region	111092533-403832		-1	n.37826122A>G
27	10491613	G	A	GATKstd	upstream_gene_variant	MODIFIER	ADAMTS20	486602	transcript	XM_022410987.1	protein_coding	-1	c.-1045G>A
27	10491613	G	A	GATKstd	upstream_gene_variant	MODIFIER	ADAMTS20	486602	transcript	XM_022410988.1	protein_coding	-1	c.-1045G>A
27	10491613	G	A	GATKstd	upstream_gene_variant	MODIFIER	ADAMTS20	486602	transcript	XM_022410989.1	protein_coding	-1	c.-1045G>A
27	10491613	G	A	GATKstd	upstream_gene_variant	MODIFIER	ADAMTS20	486602	transcript	XM_022410990.1	protein_coding	-1	c.-1045G>A
27	10491613	G	A	GATKstd	upstream_gene_variant	MODIFIER	ADAMTS20	486602	transcript	XM_022410991.1	protein_coding	-1	c.-1045G>A
27	10491613	G	A	GATKstd	upstream_gene_variant	MODIFIER	ADAMTS20	486602	transcript	XM_847045.5	protein_coding	-1	c.-1045G>A
27	10491613	G	A	GATKstd	intergenic_region	MODIFIER	LOC102156873-ADAMTS20	102156873-486602	intergenic_region	102156873-486602		-1	n.10491613G>A
29	1471831	C	CA	PASS	intergenic_region	MODIFIER	PPDPFL-LOC100855768	608588-100855768	intergenic_region	608588-100855768		-1	n.1471831_1471832insA
29	2625882	T	C	GATKstd	intron_variant	MODIFIER	SNTG1	486943	transcript	XM_022412366.1	protein_coding	9	c.467-3533T>C
29	2625882	T	C	GATKstd	intron_variant	MODIFIER	SNTG1	486943	transcript	XM_022412369.1	protein_coding	9	c.467-3533T>C
29	2625882	T	C	GATKstd	intron_variant	MODIFIER	SNTG1	486943	transcript	XM_022412367.1	protein_coding	10	c.467-3533T>C
29	2625882	T	C	GATKstd	intron_variant	MODIFIER	SNTG1	486943	transcript	XM_022412368.1	protein_coding	8	c.467-3533T>C
29	2625882	T	C	GATKstd	intron_variant	MODIFIER	SNTG1	486943	transcript	XM_005637961.3	protein_coding	9	c.467-3533T>C
29	3361068	AT	A	PASS	intron_variant	MODIFIER	PXDNL	486944	transcript	XM_544073.6	protein_coding	14	c.1795+908delA
29	3361068	AT	A	PASS	intron_variant	MODIFIER	PXDNL	486944	transcript	XM_022412266.1	protein_coding	8	c.1051+908delA
29	3361068	AT	A	PASS	intron_variant	MODIFIER	PXDNL	486944	transcript	XM_022412263.1	protein_coding	14	c.1390+908delA
29	3361068	AT	A	PASS	intron_variant	MODIFIER	PXDNL	486944	transcript	XM_005637964.2	protein_coding	12	c.1507+908delA
29	3361068	AT	A	PASS	intron_variant	MODIFIER	PXDNL	486944	transcript	XR_002620884.1	pseudogene	14	n.1830+908delA
29	3361068	AT	A	PASS	intron_variant	MODIFIER	PXDNL	486944	transcript	XR_002620885.1	pseudogene	14	n.1830+908delA
29	3361068	AT	A	PASS	intron_variant	MODIFIER	PXDNL	486944	transcript	XM_022412265.1	protein_coding	14	c.1795+908delA
29	3361068	AT	A	PASS	intron_variant	MODIFIER	PXDNL	486944	transcript	XM_022412262.1	protein_coding	14	c.1795+908delA
29	4149624	T	G	GATKstd	intron_variant	MODIFIER	ST18	486947	transcript	XM_022412470.1	protein_coding	1	c.-43-54042A>C
29	8441645	G	GT	PASS	intergenic_region	MODIFIER	LOC111093253-LOC111093248	111093253-111093248	intergenic_region	111093253-111093248		-1	n.8441645_8441646insT
29	8955005	G	A	PASS	intron_variant	MODIFIER	FAM110B	102151698	transcript	XM_014109272.2	protein_coding	2	c.-319+15714G>A
29	8955005	G	A	PASS	intron_variant	MODIFIER	FAM110B	102151698	transcript	XM_014109273.2	protein_coding	3	c.-319+15714G>A
29	8955005	G	A	PASS	intron_variant	MODIFIER	FAM110B	102151698	transcript	XM_014109275.2	protein_coding	4	c.-319+15714G>A
29	8955005	G	A	PASS	intron_variant	MODIFIER	FAM110B	102151698	transcript	XM_022412465.1	protein_coding	5	c.-319+15714G>A
29	8955005	G	A	PASS	intron_variant	MODIFIER	FAM110B	102151698	transcript	XM_014109276.2	protein_coding	2	c.-319+15714G>A
29	8955005	G	A	PASS	intron_variant	MODIFIER	FAM110B	102151698	transcript	XM_022412466.1	protein_coding	2	c.-319+15714G>A
29	9070856	G	A	GATKstd	intergenic_region	MODIFIER	LOC111093245-LOC106558019	111093245-106558019	intergenic_region	111093245-106558019		-1	n.9070856G>A
29	9081517	C	T	PASS	intergenic_region	MODIFIER	LOC111093245-LOC106558019	111093245-106558019	intergenic_region	111093245-106558019		-1	n.9081517C>T
29	9216325	C	T	GATKstd	intergenic_region	MODIFIER	LOC106558019-UBXN2B	106558019-477891	intergenic_region	106558019-477891		-1	n.9216325C>T
29	9407480	T	C	GATKstd	intron_variant	MODIFIER	NSMAF	477892	transcript	XM_022412291.1	protein_coding	5	c.348+742A>G		WARNING_TRANSCRIPT_NO_START_CODON
29	9442093	T	A	GATKstd	intergenic_region	MODIFIER	NSMAF-TOX	477892-486964	intergenic_region	477892-486964		-1	n.9442093T>A
29	9521570	C	G	GATKstd	intergenic_region	MODIFIER	NSMAF-TOX	477892-486964	intergenic_region	477892-486964		-1	n.9521570C>G
29	10403077	A	T	GATKstd	intergenic_region	MODIFIER	LOC111093171-CA8	111093171-486965	intergenic_region	111093171-486965		-1	n.10403077A>T
29	10910250	G	C	PASS	intergenic_region	MODIFIER	LOC111093232-LOC609669	111093232-609669	intergenic_region	111093232-609669		-1	n.10910250G>C
29	13087663	T	C	GATKstd	intron_variant	MODIFIER	NKAIN3	609791	transcript	XM_005638010.3	protein_coding	5	c.533-9343T>C
29	13087663	T	C	GATKstd	intron_variant	MODIFIER	NKAIN3	609791	transcript	XM_005638011.3	protein_coding	5	c.533-18276T>C
29	13087687	G	C	GATKstd	intron_variant	MODIFIER	NKAIN3	609791	transcript	XM_005638010.3	protein_coding	5	c.533-9319G>C
29	13087687	G	C	GATKstd	intron_variant	MODIFIER	NKAIN3	609791	transcript	XM_005638011.3	protein_coding	5	c.533-18252G>C
29	13088152	T	A	GATKstd	intron_variant	MODIFIER	NKAIN3	609791	transcript	XM_005638010.3	protein_coding	5	c.533-8854T>A
29	13088152	T	A	GATKstd	intron_variant	MODIFIER	NKAIN3	609791	transcript	XM_005638011.3	protein_coding	5	c.533-17787T>A
29	13088172	C	T	GATKstd	intron_variant	MODIFIER	NKAIN3	609791	transcript	XM_005638010.3	protein_coding	5	c.533-8834C>T
29	13088172	C	T	GATKstd	intron_variant	MODIFIER	NKAIN3	609791	transcript	XM_005638011.3	protein_coding	5	c.533-17767C>T
29	13088173	T	A	GATKstd	intron_variant	MODIFIER	NKAIN3	609791	transcript	XM_005638010.3	protein_coding	5	c.533-8833T>A
29	13088173	T	A	GATKstd	intron_variant	MODIFIER	NKAIN3	609791	transcript	XM_005638011.3	protein_coding	5	c.533-17766T>A
29	13088205	A	G	GATKstd	intron_variant	MODIFIER	NKAIN3	609791	transcript	XM_005638010.3	protein_coding	5	c.533-8801A>G
29	13088205	A	G	GATKstd	intron_variant	MODIFIER	NKAIN3	609791	transcript	XM_005638011.3	protein_coding	5	c.533-17734A>G
29	13088224	T	A	GATKstd	intron_variant	MODIFIER	NKAIN3	609791	transcript	XM_005638010.3	protein_coding	5	c.533-8782T>A
29	13088224	T	A	GATKstd	intron_variant	MODIFIER	NKAIN3	609791	transcript	XM_005638011.3	protein_coding	5	c.533-17715T>A
29	17341064	T	TGC	PASS	intergenic_region	MODIFIER	LOC111093201-PREX2	111093201-486984	intergenic_region	111093201-486984		-1	n.17341064_17341065insGC
29	17341066	AAAACTGGT	A	PASS	intergenic_region	MODIFIER	LOC111093201-PREX2	111093201-486984	intergenic_region	111093201-486984		-1	n.17341067_17341074delAAACTGGT
29	29770430	A	AC	PASS	intergenic_region	MODIFIER	LOC111093154-LOC102153041	111093154-102153041	intergenic_region	111093154-102153041		-1	n.29770430_29770431insC
2	17458863	G	GA	PASS	intron_variant	MODIFIER	BAMBI	487081	transcript	XM_544209.5	protein_coding	1	c.76+764_76+765insT
2	17458865	G	GCTAAATAATGCTTCCCATTAAAAAAAAAAAATTCATCTGTTCACTGAA	PASS	intron_variant	MODIFIER	BAMBI	487081	transcript	XM_544209.5	protein_coding	1	c.76+762_76+763insTTCAGTGAACAGATGAATTTTTTTTTTTTAATGGGAAGCATTATTTAG
2	20931067	C	CGTCCACGCTCCGAGCTTCGTTTGCCGCAGCTGTCCCGCCACTCCTGTCTCCGCAGGCGCCCCTTCCCCATGTGCCGGGGCAGGAGTCCTGAAAGCGAAGACCCGCTCGCCGGTACCCCATCAT	PASS	intergenic_region	MODIFIER	LOC111091466-MINDY3	111091466-487118	intergenic_region	111091466-487118		-1	n.20931067_20931068insGTCCACGCTCCGAGCTTCGTTTGCCGCAGCTGTCCCGCCACTCCTGTCTCCGCAGGCGCCCCTTCCCCATGTGCCGGGGCAGGAGTCCTGAAAGCGAAGACCCGCTCGCCGGTACCCCATCAT
2	24370519	C	CCCCCCCCCGCACTCCCCT	PASS	upstream_gene_variant	MODIFIER	UPF2	487130	transcript	XM_022407840.1	protein_coding	-1	c.-6022_-6021insCCCCCCCCGCACTCCCCT
2	24370519	C	CCCCCCCCCGCACTCCCCT	PASS	upstream_gene_variant	MODIFIER	UPF2	487130	transcript	XM_005617144.3	protein_coding	-1	c.-6022_-6021insCCCCCCCCGCACTCCCCT
2	24370519	C	CCCCCCCCCGCACTCCCCT	PASS	upstream_gene_variant	MODIFIER	UPF2	487130	transcript	XM_022407842.1	protein_coding	-1	c.-6022_-6021insCCCCCCCCGCACTCCCCT
2	24370519	C	CCCCCCCCCGCACTCCCCT	PASS	intergenic_region	MODIFIER	DHTKD1-UPF2	478008-487130	intergenic_region	478008-487130		-1	n.24370519_24370520insCCCCCCCCGCACTCCCCT
2	40548976	T	C	GATKstd	splice_region_variant&intron_variant	LOW	LARS	478051	transcript	XM_535229.6	protein_coding	31	c.3325+5A>G
2	40548976	T	C	GATKstd	splice_region_variant&intron_variant	LOW	LARS	478051	transcript	XM_022409138.1	protein_coding	29	c.3043+5A>G
2	40548976	T	C	GATKstd	splice_region_variant&intron_variant	LOW	LARS	478051	transcript	XM_014108236.2	protein_coding	32	c.3322+5A>G
2	40624774	C	T	GATKstd	intergenic_region	MODIFIER	LARS-RBM27	478051-487199	intergenic_region	478051-487199		-1	n.40624774C>T
2	40686894	C	T	GATKstd	intron_variant	MODIFIER	RBM27	487199	transcript	XM_005617348.3	protein_coding	14	c.2335-2248C>T
2	40686894	C	T	GATKstd	intron_variant	MODIFIER	RBM27	487199	transcript	XM_544327.7	protein_coding	14	c.2332-2248C>T
2	40686894	C	T	GATKstd	intron_variant	MODIFIER	RBM27	487199	transcript	XM_005617349.3	protein_coding	13	c.2170-2248C>T
2	40686894	C	T	GATKstd	intron_variant	MODIFIER	RBM27	487199	transcript	XM_005617350.3	protein_coding	13	c.2167-2248C>T
2	40686894	C	T	GATKstd	non_coding_transcript_exon_variant	MODIFIER	LOC111092098	111092098	transcript	XR_002618603.1	pseudogene	1	n.810G>A
2	40771876	A	G	GATKstd	intergenic_region	MODIFIER	POU4F3-LOC102156919	487200-102156919	intergenic_region	487200-102156919		-1	n.40771876A>G
2	40792489	C	T	GATKstd	intergenic_region	MODIFIER	POU4F3-LOC102156919	487200-102156919	intergenic_region	487200-102156919		-1	n.40792489C>T
2	40813774	T	G	PASS	downstream_gene_variant	MODIFIER	LOC102156919	102156919	transcript	XR_002618629.1	pseudogene	-1	n.*4479A>C
2	40813774	T	G	PASS	downstream_gene_variant	MODIFIER	LOC102156919	102156919	transcript	XR_001314623.2	pseudogene	-1	n.*4479A>C
2	40813774	T	G	PASS	downstream_gene_variant	MODIFIER	LOC102156919	102156919	transcript	XR_291571.3	pseudogene	-1	n.*4479A>C
2	40813774	T	G	PASS	downstream_gene_variant	MODIFIER	LOC102156919	102156919	transcript	XR_002618623.1	pseudogene	-1	n.*4479A>C
2	40813774	T	G	PASS	intergenic_region	MODIFIER	POU4F3-LOC102156919	487200-102156919	intergenic_region	487200-102156919		-1	n.40813774T>G
2	40830505	G	A	PASS	intron_variant	MODIFIER	LOC102156919	102156919	transcript	XR_002618629.1	pseudogene	4	n.923+9145C>T
2	40830505	G	A	PASS	intron_variant	MODIFIER	LOC102156919	102156919	transcript	XR_001314623.2	pseudogene	2	n.319-11868C>T
2	40830505	G	A	PASS	intron_variant	MODIFIER	LOC102156919	102156919	transcript	XR_291571.3	pseudogene	3	n.816-11868C>T
2	40830505	G	A	PASS	intron_variant	MODIFIER	LOC102156919	102156919	transcript	XR_002618623.1	pseudogene	3	n.480-11868C>T
2	40916553	A	C	GATKstd	intron_variant	MODIFIER	TCERG1	478052	transcript	XM_005617351.3	protein_coding	21	c.2991+35A>C
2	40916553	A	C	GATKstd	intron_variant	MODIFIER	TCERG1	478052	transcript	XM_535230.6	protein_coding	20	c.2940+35A>C
2	40916553	A	C	GATKstd	intron_variant	MODIFIER	TCERG1	478052	transcript	XM_853836.5	protein_coding	19	c.2877+35A>C
2	40916553	A	C	GATKstd	intron_variant	MODIFIER	TCERG1	478052	transcript	XM_005617352.3	protein_coding	20	c.2928+35A>C
2	40916553	A	C	GATKstd	intron_variant	MODIFIER	TCERG1	478052	transcript	XR_291570.3	pseudogene	21	n.3063+35A>C
2	40916553	A	C	GATKstd	intron_variant	MODIFIER	TCERG1	478052	transcript	XM_022409152.1	protein_coding	21	c.2931+35A>C
2	40976633	C	T	PASS	intergenic_region	MODIFIER	GPR151-PPP2R2B	487201-478053	intergenic_region	487201-478053		-1	n.40976633C>T
2	41018454	A	G	PASS	intron_variant	MODIFIER	PPP2R2B	478053	transcript	XM_003638915.4	protein_coding	8	c.1158+25T>C
2	41018454	A	G	PASS	intron_variant	MODIFIER	PPP2R2B	478053	transcript	XM_022409223.1	protein_coding	7	c.906+25T>C
2	41018454	A	G	PASS	intron_variant	MODIFIER	PPP2R2B	478053	transcript	XM_022409217.1	protein_coding	7	c.912+25T>C
2	41018454	A	G	PASS	intron_variant	MODIFIER	PPP2R2B	478053	transcript	XM_005617357.3	protein_coding	8	c.927+25T>C
2	41018454	A	G	PASS	intron_variant	MODIFIER	PPP2R2B	478053	transcript	XM_005617360.3	protein_coding	8	c.960+25T>C
2	41018454	A	G	PASS	intron_variant	MODIFIER	PPP2R2B	478053	transcript	XM_022409203.1	protein_coding	8	c.927+25T>C
2	41018454	A	G	PASS	intron_variant	MODIFIER	PPP2R2B	478053	transcript	XM_022409211.1	protein_coding	8	c.927+25T>C
2	41018454	A	G	PASS	intron_variant	MODIFIER	PPP2R2B	478053	transcript	XM_022409181.1	protein_coding	8	c.1086+25T>C
2	41018454	A	G	PASS	intron_variant	MODIFIER	PPP2R2B	478053	transcript	XM_005617354.3	protein_coding	7	c.921+25T>C
2	41018454	A	G	PASS	intron_variant	MODIFIER	PPP2R2B	478053	transcript	XM_005617353.3	protein_coding	8	c.1128+25T>C
2	41018454	A	G	PASS	intron_variant	MODIFIER	PPP2R2B	478053	transcript	XM_022409200.1	protein_coding	8	c.927+25T>C
2	41018454	A	G	PASS	intron_variant	MODIFIER	PPP2R2B	478053	transcript	XM_003433781.4	protein_coding	7	c.969+25T>C
2	41018454	A	G	PASS	intron_variant	MODIFIER	PPP2R2B	478053	transcript	XM_005617355.3	protein_coding	9	c.927+25T>C
2	41018454	A	G	PASS	intron_variant	MODIFIER	PPP2R2B	478053	transcript	XM_003433782.4	protein_coding	8	c.978+25T>C
2	41018454	A	G	PASS	intron_variant	MODIFIER	PPP2R2B	478053	transcript	XM_003433780.4	protein_coding	9	c.1134+25T>C
2	41018454	A	G	PASS	intron_variant	MODIFIER	PPP2R2B	478053	transcript	XM_022409183.1	protein_coding	9	c.1065+25T>C
2	41067697	C	T	GATKstd	intron_variant	MODIFIER	PPP2R2B	478053	transcript	XM_003638915.4	protein_coding	5	c.646-9324G>A
2	41067697	C	T	GATKstd	intron_variant	MODIFIER	PPP2R2B	478053	transcript	XM_022409223.1	protein_coding	4	c.394-9324G>A
2	41067697	C	T	GATKstd	intron_variant	MODIFIER	PPP2R2B	478053	transcript	XM_022409217.1	protein_coding	4	c.400-9324G>A
2	41067697	C	T	GATKstd	intron_variant	MODIFIER	PPP2R2B	478053	transcript	XM_005617357.3	protein_coding	5	c.415-9324G>A
2	41067697	C	T	GATKstd	intron_variant	MODIFIER	PPP2R2B	478053	transcript	XM_005617360.3	protein_coding	5	c.448-9324G>A
2	41067697	C	T	GATKstd	intron_variant	MODIFIER	PPP2R2B	478053	transcript	XM_022409203.1	protein_coding	5	c.415-9324G>A
2	41067697	C	T	GATKstd	intron_variant	MODIFIER	PPP2R2B	478053	transcript	XM_022409211.1	protein_coding	5	c.415-9324G>A
2	41067697	C	T	GATKstd	intron_variant	MODIFIER	PPP2R2B	478053	transcript	XM_022409181.1	protein_coding	5	c.574-9324G>A
2	41067697	C	T	GATKstd	intron_variant	MODIFIER	PPP2R2B	478053	transcript	XM_005617354.3	protein_coding	4	c.409-9324G>A
2	41067697	C	T	GATKstd	intron_variant	MODIFIER	PPP2R2B	478053	transcript	XM_005617353.3	protein_coding	5	c.616-9324G>A
2	41067697	C	T	GATKstd	intron_variant	MODIFIER	PPP2R2B	478053	transcript	XM_022409200.1	protein_coding	5	c.415-9324G>A
2	41067697	C	T	GATKstd	intron_variant	MODIFIER	PPP2R2B	478053	transcript	XM_003433781.4	protein_coding	4	c.457-9324G>A
2	41067697	C	T	GATKstd	intron_variant	MODIFIER	PPP2R2B	478053	transcript	XM_005617355.3	protein_coding	6	c.415-9324G>A
2	41067697	C	T	GATKstd	intron_variant	MODIFIER	PPP2R2B	478053	transcript	XM_003433782.4	protein_coding	5	c.466-9324G>A
2	41067697	C	T	GATKstd	intron_variant	MODIFIER	PPP2R2B	478053	transcript	XM_003433780.4	protein_coding	6	c.622-9324G>A
2	41067697	C	T	GATKstd	intron_variant	MODIFIER	PPP2R2B	478053	transcript	XM_022409183.1	protein_coding	6	c.553-9324G>A
2	41070436	C	T	GATKstd	intron_variant	MODIFIER	PPP2R2B	478053	transcript	XM_003638915.4	protein_coding	5	c.646-12063G>A
2	41070436	C	T	GATKstd	intron_variant	MODIFIER	PPP2R2B	478053	transcript	XM_022409223.1	protein_coding	4	c.394-12063G>A
2	41070436	C	T	GATKstd	intron_variant	MODIFIER	PPP2R2B	478053	transcript	XM_022409217.1	protein_coding	4	c.400-12063G>A
2	41070436	C	T	GATKstd	intron_variant	MODIFIER	PPP2R2B	478053	transcript	XM_005617357.3	protein_coding	5	c.415-12063G>A
2	41070436	C	T	GATKstd	intron_variant	MODIFIER	PPP2R2B	478053	transcript	XM_005617360.3	protein_coding	5	c.448-12063G>A
2	41070436	C	T	GATKstd	intron_variant	MODIFIER	PPP2R2B	478053	transcript	XM_022409203.1	protein_coding	5	c.415-12063G>A
2	41070436	C	T	GATKstd	intron_variant	MODIFIER	PPP2R2B	478053	transcript	XM_022409211.1	protein_coding	5	c.415-12063G>A
2	41070436	C	T	GATKstd	intron_variant	MODIFIER	PPP2R2B	478053	transcript	XM_022409181.1	protein_coding	5	c.574-12063G>A
2	41070436	C	T	GATKstd	intron_variant	MODIFIER	PPP2R2B	478053	transcript	XM_005617354.3	protein_coding	4	c.409-12063G>A
2	41070436	C	T	GATKstd	intron_variant	MODIFIER	PPP2R2B	478053	transcript	XM_005617353.3	protein_coding	5	c.616-12063G>A
2	41070436	C	T	GATKstd	intron_variant	MODIFIER	PPP2R2B	478053	transcript	XM_022409200.1	protein_coding	5	c.415-12063G>A
2	41070436	C	T	GATKstd	intron_variant	MODIFIER	PPP2R2B	478053	transcript	XM_003433781.4	protein_coding	4	c.457-12063G>A
2	41070436	C	T	GATKstd	intron_variant	MODIFIER	PPP2R2B	478053	transcript	XM_005617355.3	protein_coding	6	c.415-12063G>A
2	41070436	C	T	GATKstd	intron_variant	MODIFIER	PPP2R2B	478053	transcript	XM_003433782.4	protein_coding	5	c.466-12063G>A
2	41070436	C	T	GATKstd	intron_variant	MODIFIER	PPP2R2B	478053	transcript	XM_003433780.4	protein_coding	6	c.622-12063G>A
2	41070436	C	T	GATKstd	intron_variant	MODIFIER	PPP2R2B	478053	transcript	XM_022409183.1	protein_coding	6	c.553-12063G>A
2	41070787	C	T	GATKstd	intron_variant	MODIFIER	PPP2R2B	478053	transcript	XM_003638915.4	protein_coding	5	c.646-12414G>A
2	41070787	C	T	GATKstd	intron_variant	MODIFIER	PPP2R2B	478053	transcript	XM_022409223.1	protein_coding	4	c.394-12414G>A
2	41070787	C	T	GATKstd	intron_variant	MODIFIER	PPP2R2B	478053	transcript	XM_022409217.1	protein_coding	4	c.400-12414G>A
2	41070787	C	T	GATKstd	intron_variant	MODIFIER	PPP2R2B	478053	transcript	XM_005617357.3	protein_coding	5	c.415-12414G>A
2	41070787	C	T	GATKstd	intron_variant	MODIFIER	PPP2R2B	478053	transcript	XM_005617360.3	protein_coding	5	c.448-12414G>A
2	41070787	C	T	GATKstd	intron_variant	MODIFIER	PPP2R2B	478053	transcript	XM_022409203.1	protein_coding	5	c.415-12414G>A
2	41070787	C	T	GATKstd	intron_variant	MODIFIER	PPP2R2B	478053	transcript	XM_022409211.1	protein_coding	5	c.415-12414G>A
2	41070787	C	T	GATKstd	intron_variant	MODIFIER	PPP2R2B	478053	transcript	XM_022409181.1	protein_coding	5	c.574-12414G>A
2	41070787	C	T	GATKstd	intron_variant	MODIFIER	PPP2R2B	478053	transcript	XM_005617354.3	protein_coding	4	c.409-12414G>A
2	41070787	C	T	GATKstd	intron_variant	MODIFIER	PPP2R2B	478053	transcript	XM_005617353.3	protein_coding	5	c.616-12414G>A
2	41070787	C	T	GATKstd	intron_variant	MODIFIER	PPP2R2B	478053	transcript	XM_022409200.1	protein_coding	5	c.415-12414G>A
2	41070787	C	T	GATKstd	intron_variant	MODIFIER	PPP2R2B	478053	transcript	XM_003433781.4	protein_coding	4	c.457-12414G>A
2	41070787	C	T	GATKstd	intron_variant	MODIFIER	PPP2R2B	478053	transcript	XM_005617355.3	protein_coding	6	c.415-12414G>A
2	41070787	C	T	GATKstd	intron_variant	MODIFIER	PPP2R2B	478053	transcript	XM_003433782.4	protein_coding	5	c.466-12414G>A
2	41070787	C	T	GATKstd	intron_variant	MODIFIER	PPP2R2B	478053	transcript	XM_003433780.4	protein_coding	6	c.622-12414G>A
2	41070787	C	T	GATKstd	intron_variant	MODIFIER	PPP2R2B	478053	transcript	XM_022409183.1	protein_coding	6	c.553-12414G>A
2	41072989	G	A	GATKstd	intron_variant	MODIFIER	PPP2R2B	478053	transcript	XM_003638915.4	protein_coding	5	c.646-14616C>T
2	41072989	G	A	GATKstd	intron_variant	MODIFIER	PPP2R2B	478053	transcript	XM_022409223.1	protein_coding	4	c.394-14616C>T
2	41072989	G	A	GATKstd	intron_variant	MODIFIER	PPP2R2B	478053	transcript	XM_022409217.1	protein_coding	4	c.400-14616C>T
2	41072989	G	A	GATKstd	intron_variant	MODIFIER	PPP2R2B	478053	transcript	XM_005617357.3	protein_coding	5	c.415-14616C>T
2	41072989	G	A	GATKstd	intron_variant	MODIFIER	PPP2R2B	478053	transcript	XM_005617360.3	protein_coding	5	c.448-14616C>T
2	41072989	G	A	GATKstd	intron_variant	MODIFIER	PPP2R2B	478053	transcript	XM_022409203.1	protein_coding	5	c.415-14616C>T
2	41072989	G	A	GATKstd	intron_variant	MODIFIER	PPP2R2B	478053	transcript	XM_022409211.1	protein_coding	5	c.415-14616C>T
2	41072989	G	A	GATKstd	intron_variant	MODIFIER	PPP2R2B	478053	transcript	XM_022409181.1	protein_coding	5	c.574-14616C>T
2	41072989	G	A	GATKstd	intron_variant	MODIFIER	PPP2R2B	478053	transcript	XM_005617354.3	protein_coding	4	c.409-14616C>T
2	41072989	G	A	GATKstd	intron_variant	MODIFIER	PPP2R2B	478053	transcript	XM_005617353.3	protein_coding	5	c.616-14616C>T
2	41072989	G	A	GATKstd	intron_variant	MODIFIER	PPP2R2B	478053	transcript	XM_022409200.1	protein_coding	5	c.415-14616C>T
2	41072989	G	A	GATKstd	intron_variant	MODIFIER	PPP2R2B	478053	transcript	XM_003433781.4	protein_coding	4	c.457-14616C>T
2	41072989	G	A	GATKstd	intron_variant	MODIFIER	PPP2R2B	478053	transcript	XM_005617355.3	protein_coding	6	c.415-14616C>T
2	41072989	G	A	GATKstd	intron_variant	MODIFIER	PPP2R2B	478053	transcript	XM_003433782.4	protein_coding	5	c.466-14616C>T
2	41072989	G	A	GATKstd	intron_variant	MODIFIER	PPP2R2B	478053	transcript	XM_003433780.4	protein_coding	6	c.622-14616C>T
2	41072989	G	A	GATKstd	intron_variant	MODIFIER	PPP2R2B	478053	transcript	XM_022409183.1	protein_coding	6	c.553-14616C>T
2	41074961	AC	A	PASS	intron_variant	MODIFIER	PPP2R2B	478053	transcript	XM_003638915.4	protein_coding	5	c.646-16589delG
2	41074961	AC	A	PASS	intron_variant	MODIFIER	PPP2R2B	478053	transcript	XM_022409223.1	protein_coding	4	c.394-16589delG
2	41074961	AC	A	PASS	intron_variant	MODIFIER	PPP2R2B	478053	transcript	XM_022409217.1	protein_coding	4	c.400-16589delG
2	41074961	AC	A	PASS	intron_variant	MODIFIER	PPP2R2B	478053	transcript	XM_005617357.3	protein_coding	5	c.415-16589delG
2	41074961	AC	A	PASS	intron_variant	MODIFIER	PPP2R2B	478053	transcript	XM_005617360.3	protein_coding	5	c.448-16589delG
2	41074961	AC	A	PASS	intron_variant	MODIFIER	PPP2R2B	478053	transcript	XM_022409203.1	protein_coding	5	c.415-16589delG
2	41074961	AC	A	PASS	intron_variant	MODIFIER	PPP2R2B	478053	transcript	XM_022409211.1	protein_coding	5	c.415-16589delG
2	41074961	AC	A	PASS	intron_variant	MODIFIER	PPP2R2B	478053	transcript	XM_022409181.1	protein_coding	5	c.574-16589delG
2	41074961	AC	A	PASS	intron_variant	MODIFIER	PPP2R2B	478053	transcript	XM_005617354.3	protein_coding	4	c.409-16589delG
2	41074961	AC	A	PASS	intron_variant	MODIFIER	PPP2R2B	478053	transcript	XM_005617353.3	protein_coding	5	c.616-16589delG
2	41074961	AC	A	PASS	intron_variant	MODIFIER	PPP2R2B	478053	transcript	XM_022409200.1	protein_coding	5	c.415-16589delG
2	41074961	AC	A	PASS	intron_variant	MODIFIER	PPP2R2B	478053	transcript	XM_003433781.4	protein_coding	4	c.457-16589delG
2	41074961	AC	A	PASS	intron_variant	MODIFIER	PPP2R2B	478053	transcript	XM_005617355.3	protein_coding	6	c.415-16589delG
2	41074961	AC	A	PASS	intron_variant	MODIFIER	PPP2R2B	478053	transcript	XM_003433782.4	protein_coding	5	c.466-16589delG
2	41074961	AC	A	PASS	intron_variant	MODIFIER	PPP2R2B	478053	transcript	XM_003433780.4	protein_coding	6	c.622-16589delG
2	41074961	AC	A	PASS	intron_variant	MODIFIER	PPP2R2B	478053	transcript	XM_022409183.1	protein_coding	6	c.553-16589delG
2	41079190	A	G	GATKstd	intron_variant	MODIFIER	PPP2R2B	478053	transcript	XM_003638915.4	protein_coding	5	c.646-20817T>C
2	41079190	A	G	GATKstd	intron_variant	MODIFIER	PPP2R2B	478053	transcript	XM_022409223.1	protein_coding	4	c.394-20817T>C
2	41079190	A	G	GATKstd	intron_variant	MODIFIER	PPP2R2B	478053	transcript	XM_022409217.1	protein_coding	4	c.400-20817T>C
2	41079190	A	G	GATKstd	intron_variant	MODIFIER	PPP2R2B	478053	transcript	XM_005617357.3	protein_coding	5	c.415-20817T>C
2	41079190	A	G	GATKstd	intron_variant	MODIFIER	PPP2R2B	478053	transcript	XM_005617360.3	protein_coding	5	c.448-20817T>C
2	41079190	A	G	GATKstd	intron_variant	MODIFIER	PPP2R2B	478053	transcript	XM_022409203.1	protein_coding	5	c.415-20817T>C
2	41079190	A	G	GATKstd	intron_variant	MODIFIER	PPP2R2B	478053	transcript	XM_022409211.1	protein_coding	5	c.415-20817T>C
2	41079190	A	G	GATKstd	intron_variant	MODIFIER	PPP2R2B	478053	transcript	XM_022409181.1	protein_coding	5	c.574-20817T>C
2	41079190	A	G	GATKstd	intron_variant	MODIFIER	PPP2R2B	478053	transcript	XM_005617354.3	protein_coding	4	c.409-20817T>C
2	41079190	A	G	GATKstd	intron_variant	MODIFIER	PPP2R2B	478053	transcript	XM_005617353.3	protein_coding	5	c.616-20817T>C
2	41079190	A	G	GATKstd	intron_variant	MODIFIER	PPP2R2B	478053	transcript	XM_022409200.1	protein_coding	5	c.415-20817T>C
2	41079190	A	G	GATKstd	intron_variant	MODIFIER	PPP2R2B	478053	transcript	XM_003433781.4	protein_coding	4	c.457-20817T>C
2	41079190	A	G	GATKstd	intron_variant	MODIFIER	PPP2R2B	478053	transcript	XM_005617355.3	protein_coding	6	c.415-20817T>C
2	41079190	A	G	GATKstd	intron_variant	MODIFIER	PPP2R2B	478053	transcript	XM_003433782.4	protein_coding	5	c.466-20817T>C
2	41079190	A	G	GATKstd	intron_variant	MODIFIER	PPP2R2B	478053	transcript	XM_003433780.4	protein_coding	6	c.622-20817T>C
2	41079190	A	G	GATKstd	intron_variant	MODIFIER	PPP2R2B	478053	transcript	XM_022409183.1	protein_coding	6	c.553-20817T>C
2	41086639	T	A	GATKstd	intron_variant	MODIFIER	PPP2R2B	478053	transcript	XM_003638915.4	protein_coding	5	c.645+15865A>T
2	41086639	T	A	GATKstd	intron_variant	MODIFIER	PPP2R2B	478053	transcript	XM_022409223.1	protein_coding	4	c.393+15865A>T
2	41086639	T	A	GATKstd	intron_variant	MODIFIER	PPP2R2B	478053	transcript	XM_022409217.1	protein_coding	4	c.399+15865A>T
2	41086639	T	A	GATKstd	intron_variant	MODIFIER	PPP2R2B	478053	transcript	XM_005617357.3	protein_coding	5	c.414+15865A>T
2	41086639	T	A	GATKstd	intron_variant	MODIFIER	PPP2R2B	478053	transcript	XM_005617360.3	protein_coding	5	c.447+15865A>T
2	41086639	T	A	GATKstd	intron_variant	MODIFIER	PPP2R2B	478053	transcript	XM_022409203.1	protein_coding	5	c.414+15865A>T
2	41086639	T	A	GATKstd	intron_variant	MODIFIER	PPP2R2B	478053	transcript	XM_022409211.1	protein_coding	5	c.414+15865A>T
2	41086639	T	A	GATKstd	intron_variant	MODIFIER	PPP2R2B	478053	transcript	XM_022409181.1	protein_coding	5	c.573+15865A>T
2	41086639	T	A	GATKstd	intron_variant	MODIFIER	PPP2R2B	478053	transcript	XM_005617354.3	protein_coding	4	c.408+15865A>T
2	41086639	T	A	GATKstd	intron_variant	MODIFIER	PPP2R2B	478053	transcript	XM_005617353.3	protein_coding	5	c.615+15865A>T
2	41086639	T	A	GATKstd	intron_variant	MODIFIER	PPP2R2B	478053	transcript	XM_022409200.1	protein_coding	5	c.414+15865A>T
2	41086639	T	A	GATKstd	intron_variant	MODIFIER	PPP2R2B	478053	transcript	XM_003433781.4	protein_coding	4	c.456+15865A>T
2	41086639	T	A	GATKstd	intron_variant	MODIFIER	PPP2R2B	478053	transcript	XM_005617355.3	protein_coding	6	c.414+15865A>T
2	41086639	T	A	GATKstd	intron_variant	MODIFIER	PPP2R2B	478053	transcript	XM_003433782.4	protein_coding	5	c.465+15865A>T
2	41086639	T	A	GATKstd	intron_variant	MODIFIER	PPP2R2B	478053	transcript	XM_003433780.4	protein_coding	6	c.621+15865A>T
2	41086639	T	A	GATKstd	intron_variant	MODIFIER	PPP2R2B	478053	transcript	XM_022409183.1	protein_coding	6	c.552+15865A>T
2	41089481	G	A	GATKstd	intron_variant	MODIFIER	PPP2R2B	478053	transcript	XM_003638915.4	protein_coding	5	c.645+13023C>T
2	41089481	G	A	GATKstd	intron_variant	MODIFIER	PPP2R2B	478053	transcript	XM_022409223.1	protein_coding	4	c.393+13023C>T
2	41089481	G	A	GATKstd	intron_variant	MODIFIER	PPP2R2B	478053	transcript	XM_022409217.1	protein_coding	4	c.399+13023C>T
2	41089481	G	A	GATKstd	intron_variant	MODIFIER	PPP2R2B	478053	transcript	XM_005617357.3	protein_coding	5	c.414+13023C>T
2	41089481	G	A	GATKstd	intron_variant	MODIFIER	PPP2R2B	478053	transcript	XM_005617360.3	protein_coding	5	c.447+13023C>T
2	41089481	G	A	GATKstd	intron_variant	MODIFIER	PPP2R2B	478053	transcript	XM_022409203.1	protein_coding	5	c.414+13023C>T
2	41089481	G	A	GATKstd	intron_variant	MODIFIER	PPP2R2B	478053	transcript	XM_022409211.1	protein_coding	5	c.414+13023C>T
2	41089481	G	A	GATKstd	intron_variant	MODIFIER	PPP2R2B	478053	transcript	XM_022409181.1	protein_coding	5	c.573+13023C>T
2	41089481	G	A	GATKstd	intron_variant	MODIFIER	PPP2R2B	478053	transcript	XM_005617354.3	protein_coding	4	c.408+13023C>T
2	41089481	G	A	GATKstd	intron_variant	MODIFIER	PPP2R2B	478053	transcript	XM_005617353.3	protein_coding	5	c.615+13023C>T
2	41089481	G	A	GATKstd	intron_variant	MODIFIER	PPP2R2B	478053	transcript	XM_022409200.1	protein_coding	5	c.414+13023C>T
2	41089481	G	A	GATKstd	intron_variant	MODIFIER	PPP2R2B	478053	transcript	XM_003433781.4	protein_coding	4	c.456+13023C>T
2	41089481	G	A	GATKstd	intron_variant	MODIFIER	PPP2R2B	478053	transcript	XM_005617355.3	protein_coding	6	c.414+13023C>T
2	41089481	G	A	GATKstd	intron_variant	MODIFIER	PPP2R2B	478053	transcript	XM_003433782.4	protein_coding	5	c.465+13023C>T
2	41089481	G	A	GATKstd	intron_variant	MODIFIER	PPP2R2B	478053	transcript	XM_003433780.4	protein_coding	6	c.621+13023C>T
2	41089481	G	A	GATKstd	intron_variant	MODIFIER	PPP2R2B	478053	transcript	XM_022409183.1	protein_coding	6	c.552+13023C>T
2	41100501	T	C	PASS	intron_variant	MODIFIER	PPP2R2B	478053	transcript	XM_003638915.4	protein_coding	5	c.645+2003A>G
2	41100501	T	C	PASS	intron_variant	MODIFIER	PPP2R2B	478053	transcript	XM_022409223.1	protein_coding	4	c.393+2003A>G
2	41100501	T	C	PASS	intron_variant	MODIFIER	PPP2R2B	478053	transcript	XM_022409217.1	protein_coding	4	c.399+2003A>G
2	41100501	T	C	PASS	intron_variant	MODIFIER	PPP2R2B	478053	transcript	XM_005617357.3	protein_coding	5	c.414+2003A>G
2	41100501	T	C	PASS	intron_variant	MODIFIER	PPP2R2B	478053	transcript	XM_005617360.3	protein_coding	5	c.447+2003A>G
2	41100501	T	C	PASS	intron_variant	MODIFIER	PPP2R2B	478053	transcript	XM_022409203.1	protein_coding	5	c.414+2003A>G
2	41100501	T	C	PASS	intron_variant	MODIFIER	PPP2R2B	478053	transcript	XM_022409211.1	protein_coding	5	c.414+2003A>G
2	41100501	T	C	PASS	intron_variant	MODIFIER	PPP2R2B	478053	transcript	XM_022409181.1	protein_coding	5	c.573+2003A>G
2	41100501	T	C	PASS	intron_variant	MODIFIER	PPP2R2B	478053	transcript	XM_005617354.3	protein_coding	4	c.408+2003A>G
2	41100501	T	C	PASS	intron_variant	MODIFIER	PPP2R2B	478053	transcript	XM_005617353.3	protein_coding	5	c.615+2003A>G
2	41100501	T	C	PASS	intron_variant	MODIFIER	PPP2R2B	478053	transcript	XM_022409200.1	protein_coding	5	c.414+2003A>G
2	41100501	T	C	PASS	intron_variant	MODIFIER	PPP2R2B	478053	transcript	XM_003433781.4	protein_coding	4	c.456+2003A>G
2	41100501	T	C	PASS	intron_variant	MODIFIER	PPP2R2B	478053	transcript	XM_005617355.3	protein_coding	6	c.414+2003A>G
2	41100501	T	C	PASS	intron_variant	MODIFIER	PPP2R2B	478053	transcript	XM_003433782.4	protein_coding	5	c.465+2003A>G
2	41100501	T	C	PASS	intron_variant	MODIFIER	PPP2R2B	478053	transcript	XM_003433780.4	protein_coding	6	c.621+2003A>G
2	41100501	T	C	PASS	intron_variant	MODIFIER	PPP2R2B	478053	transcript	XM_022409183.1	protein_coding	6	c.552+2003A>G
2	41103017	T	C	GATKstd	intron_variant	MODIFIER	PPP2R2B	478053	transcript	XM_003638915.4	protein_coding	4	c.533-401A>G
2	41103017	T	C	GATKstd	intron_variant	MODIFIER	PPP2R2B	478053	transcript	XM_022409223.1	protein_coding	3	c.281-401A>G
2	41103017	T	C	GATKstd	intron_variant	MODIFIER	PPP2R2B	478053	transcript	XM_022409217.1	protein_coding	3	c.287-401A>G
2	41103017	T	C	GATKstd	intron_variant	MODIFIER	PPP2R2B	478053	transcript	XM_005617357.3	protein_coding	4	c.302-401A>G
2	41103017	T	C	GATKstd	intron_variant	MODIFIER	PPP2R2B	478053	transcript	XM_005617360.3	protein_coding	4	c.335-401A>G
2	41103017	T	C	GATKstd	intron_variant	MODIFIER	PPP2R2B	478053	transcript	XM_022409203.1	protein_coding	4	c.302-401A>G
2	41103017	T	C	GATKstd	intron_variant	MODIFIER	PPP2R2B	478053	transcript	XM_022409211.1	protein_coding	4	c.302-401A>G
2	41103017	T	C	GATKstd	intron_variant	MODIFIER	PPP2R2B	478053	transcript	XM_022409181.1	protein_coding	4	c.461-401A>G
2	41103017	T	C	GATKstd	intron_variant	MODIFIER	PPP2R2B	478053	transcript	XM_005617354.3	protein_coding	3	c.296-401A>G
2	41103017	T	C	GATKstd	intron_variant	MODIFIER	PPP2R2B	478053	transcript	XM_005617353.3	protein_coding	4	c.503-401A>G
2	41103017	T	C	GATKstd	intron_variant	MODIFIER	PPP2R2B	478053	transcript	XM_022409200.1	protein_coding	4	c.302-401A>G
2	41103017	T	C	GATKstd	intron_variant	MODIFIER	PPP2R2B	478053	transcript	XM_003433781.4	protein_coding	3	c.344-401A>G
2	41103017	T	C	GATKstd	intron_variant	MODIFIER	PPP2R2B	478053	transcript	XM_005617355.3	protein_coding	5	c.302-401A>G
2	41103017	T	C	GATKstd	intron_variant	MODIFIER	PPP2R2B	478053	transcript	XM_003433782.4	protein_coding	4	c.353-401A>G
2	41103017	T	C	GATKstd	intron_variant	MODIFIER	PPP2R2B	478053	transcript	XM_003433780.4	protein_coding	5	c.509-401A>G
2	41103017	T	C	GATKstd	intron_variant	MODIFIER	PPP2R2B	478053	transcript	XM_022409183.1	protein_coding	5	c.440-401A>G
2	41103599	C	T	GATKstd	intron_variant	MODIFIER	PPP2R2B	478053	transcript	XM_003638915.4	protein_coding	4	c.533-983G>A
2	41103599	C	T	GATKstd	intron_variant	MODIFIER	PPP2R2B	478053	transcript	XM_022409223.1	protein_coding	3	c.281-983G>A
2	41103599	C	T	GATKstd	intron_variant	MODIFIER	PPP2R2B	478053	transcript	XM_022409217.1	protein_coding	3	c.287-983G>A
2	41103599	C	T	GATKstd	intron_variant	MODIFIER	PPP2R2B	478053	transcript	XM_005617357.3	protein_coding	4	c.302-983G>A
2	41103599	C	T	GATKstd	intron_variant	MODIFIER	PPP2R2B	478053	transcript	XM_005617360.3	protein_coding	4	c.335-983G>A
2	41103599	C	T	GATKstd	intron_variant	MODIFIER	PPP2R2B	478053	transcript	XM_022409203.1	protein_coding	4	c.302-983G>A
2	41103599	C	T	GATKstd	intron_variant	MODIFIER	PPP2R2B	478053	transcript	XM_022409211.1	protein_coding	4	c.302-983G>A
2	41103599	C	T	GATKstd	intron_variant	MODIFIER	PPP2R2B	478053	transcript	XM_022409181.1	protein_coding	4	c.461-983G>A
2	41103599	C	T	GATKstd	intron_variant	MODIFIER	PPP2R2B	478053	transcript	XM_005617354.3	protein_coding	3	c.296-983G>A
2	41103599	C	T	GATKstd	intron_variant	MODIFIER	PPP2R2B	478053	transcript	XM_005617353.3	protein_coding	4	c.503-983G>A
2	41103599	C	T	GATKstd	intron_variant	MODIFIER	PPP2R2B	478053	transcript	XM_022409200.1	protein_coding	4	c.302-983G>A
2	41103599	C	T	GATKstd	intron_variant	MODIFIER	PPP2R2B	478053	transcript	XM_003433781.4	protein_coding	3	c.344-983G>A
2	41103599	C	T	GATKstd	intron_variant	MODIFIER	PPP2R2B	478053	transcript	XM_005617355.3	protein_coding	5	c.302-983G>A
2	41103599	C	T	GATKstd	intron_variant	MODIFIER	PPP2R2B	478053	transcript	XM_003433782.4	protein_coding	4	c.353-983G>A
2	41103599	C	T	GATKstd	intron_variant	MODIFIER	PPP2R2B	478053	transcript	XM_003433780.4	protein_coding	5	c.509-983G>A
2	41103599	C	T	GATKstd	intron_variant	MODIFIER	PPP2R2B	478053	transcript	XM_022409183.1	protein_coding	5	c.440-983G>A
2	41105393	C	T	GATKstd	intron_variant	MODIFIER	PPP2R2B	478053	transcript	XM_003638915.4	protein_coding	4	c.533-2777G>A
2	41105393	C	T	GATKstd	intron_variant	MODIFIER	PPP2R2B	478053	transcript	XM_022409223.1	protein_coding	3	c.281-2777G>A
2	41105393	C	T	GATKstd	intron_variant	MODIFIER	PPP2R2B	478053	transcript	XM_022409217.1	protein_coding	3	c.287-2777G>A
2	41105393	C	T	GATKstd	intron_variant	MODIFIER	PPP2R2B	478053	transcript	XM_005617357.3	protein_coding	4	c.302-2777G>A
2	41105393	C	T	GATKstd	intron_variant	MODIFIER	PPP2R2B	478053	transcript	XM_005617360.3	protein_coding	4	c.335-2777G>A
2	41105393	C	T	GATKstd	intron_variant	MODIFIER	PPP2R2B	478053	transcript	XM_022409203.1	protein_coding	4	c.302-2777G>A
2	41105393	C	T	GATKstd	intron_variant	MODIFIER	PPP2R2B	478053	transcript	XM_022409211.1	protein_coding	4	c.302-2777G>A
2	41105393	C	T	GATKstd	intron_variant	MODIFIER	PPP2R2B	478053	transcript	XM_022409181.1	protein_coding	4	c.461-2777G>A
2	41105393	C	T	GATKstd	intron_variant	MODIFIER	PPP2R2B	478053	transcript	XM_005617354.3	protein_coding	3	c.296-2777G>A
2	41105393	C	T	GATKstd	intron_variant	MODIFIER	PPP2R2B	478053	transcript	XM_005617353.3	protein_coding	4	c.503-2777G>A
2	41105393	C	T	GATKstd	intron_variant	MODIFIER	PPP2R2B	478053	transcript	XM_022409200.1	protein_coding	4	c.302-2777G>A
2	41105393	C	T	GATKstd	intron_variant	MODIFIER	PPP2R2B	478053	transcript	XM_003433781.4	protein_coding	3	c.344-2777G>A
2	41105393	C	T	GATKstd	intron_variant	MODIFIER	PPP2R2B	478053	transcript	XM_005617355.3	protein_coding	5	c.302-2777G>A
2	41105393	C	T	GATKstd	intron_variant	MODIFIER	PPP2R2B	478053	transcript	XM_003433782.4	protein_coding	4	c.353-2777G>A
2	41105393	C	T	GATKstd	intron_variant	MODIFIER	PPP2R2B	478053	transcript	XM_003433780.4	protein_coding	5	c.509-2777G>A
2	41105393	C	T	GATKstd	intron_variant	MODIFIER	PPP2R2B	478053	transcript	XM_022409183.1	protein_coding	5	c.440-2777G>A
2	41110604	G	A	GATKstd	intron_variant	MODIFIER	PPP2R2B	478053	transcript	XM_003638915.4	protein_coding	3	c.366+842C>T
2	41110604	G	A	GATKstd	intron_variant	MODIFIER	PPP2R2B	478053	transcript	XM_022409223.1	protein_coding	2	c.114+842C>T
2	41110604	G	A	GATKstd	intron_variant	MODIFIER	PPP2R2B	478053	transcript	XM_022409217.1	protein_coding	2	c.120+842C>T
2	41110604	G	A	GATKstd	intron_variant	MODIFIER	PPP2R2B	478053	transcript	XM_005617357.3	protein_coding	3	c.135+842C>T
2	41110604	G	A	GATKstd	intron_variant	MODIFIER	PPP2R2B	478053	transcript	XM_005617360.3	protein_coding	3	c.168+842C>T
2	41110604	G	A	GATKstd	intron_variant	MODIFIER	PPP2R2B	478053	transcript	XM_022409203.1	protein_coding	3	c.135+842C>T
2	41110604	G	A	GATKstd	intron_variant	MODIFIER	PPP2R2B	478053	transcript	XM_022409211.1	protein_coding	3	c.135+842C>T
2	41110604	G	A	GATKstd	intron_variant	MODIFIER	PPP2R2B	478053	transcript	XM_022409181.1	protein_coding	3	c.294+842C>T
2	41110604	G	A	GATKstd	intron_variant	MODIFIER	PPP2R2B	478053	transcript	XM_005617354.3	protein_coding	2	c.129+842C>T
2	41110604	G	A	GATKstd	intron_variant	MODIFIER	PPP2R2B	478053	transcript	XM_005617353.3	protein_coding	3	c.336+842C>T
2	41110604	G	A	GATKstd	intron_variant	MODIFIER	PPP2R2B	478053	transcript	XM_022409200.1	protein_coding	3	c.135+842C>T
2	41110604	G	A	GATKstd	intron_variant	MODIFIER	PPP2R2B	478053	transcript	XM_003433781.4	protein_coding	2	c.177+842C>T
2	41110604	G	A	GATKstd	intron_variant	MODIFIER	PPP2R2B	478053	transcript	XM_005617355.3	protein_coding	4	c.135+842C>T
2	41110604	G	A	GATKstd	intron_variant	MODIFIER	PPP2R2B	478053	transcript	XM_003433782.4	protein_coding	3	c.186+842C>T
2	41110604	G	A	GATKstd	intron_variant	MODIFIER	PPP2R2B	478053	transcript	XM_003433780.4	protein_coding	4	c.342+842C>T
2	41110604	G	A	GATKstd	intron_variant	MODIFIER	PPP2R2B	478053	transcript	XM_022409183.1	protein_coding	4	c.273+842C>T
2	41173634	G	T	GATKstd	intron_variant	MODIFIER	PPP2R2B	478053	transcript	XM_003638915.4	protein_coding	2	c.269-62091C>A
2	41173634	G	T	GATKstd	intron_variant	MODIFIER	PPP2R2B	478053	transcript	XM_022409223.1	protein_coding	1	c.16+17892C>A
2	41173634	G	T	GATKstd	intron_variant	MODIFIER	PPP2R2B	478053	transcript	XM_022409217.1	protein_coding	1	c.22+24515C>A
2	41173634	G	T	GATKstd	intron_variant	MODIFIER	PPP2R2B	478053	transcript	XM_005617357.3	protein_coding	2	c.38-62091C>A
2	41173634	G	T	GATKstd	intron_variant	MODIFIER	PPP2R2B	478053	transcript	XM_005617360.3	protein_coding	2	c.71-62091C>A
2	41173634	G	T	GATKstd	intron_variant	MODIFIER	PPP2R2B	478053	transcript	XM_022409203.1	protein_coding	2	c.38-62091C>A
2	41173634	G	T	GATKstd	intron_variant	MODIFIER	PPP2R2B	478053	transcript	XM_022409211.1	protein_coding	2	c.38-62091C>A
2	41173634	G	T	GATKstd	intron_variant	MODIFIER	PPP2R2B	478053	transcript	XM_022409181.1	protein_coding	2	c.197-62091C>A
2	41173634	G	T	GATKstd	intron_variant	MODIFIER	PPP2R2B	478053	transcript	XM_005617354.3	protein_coding	1	c.32-62091C>A
2	41173634	G	T	GATKstd	intron_variant	MODIFIER	PPP2R2B	478053	transcript	XM_005617353.3	protein_coding	2	c.239-62091C>A
2	41173634	G	T	GATKstd	intron_variant	MODIFIER	PPP2R2B	478053	transcript	XM_022409200.1	protein_coding	2	c.38-62091C>A
2	41173634	G	T	GATKstd	intron_variant	MODIFIER	PPP2R2B	478053	transcript	XM_003433781.4	protein_coding	1	c.80-62091C>A
2	41173634	G	T	GATKstd	intron_variant	MODIFIER	PPP2R2B	478053	transcript	XM_005617355.3	protein_coding	3	c.38-62091C>A
2	41173634	G	T	GATKstd	intron_variant	MODIFIER	PPP2R2B	478053	transcript	XM_003433782.4	protein_coding	2	c.89-62091C>A
2	41173634	G	T	GATKstd	intron_variant	MODIFIER	PPP2R2B	478053	transcript	XM_003433780.4	protein_coding	3	c.245-62091C>A
2	41173634	G	T	GATKstd	intron_variant	MODIFIER	PPP2R2B	478053	transcript	XM_022409183.1	protein_coding	3	c.176-62091C>A
2	41233348	T	A	GATKstd	intron_variant	MODIFIER	PPP2R2B	478053	transcript	XM_003638915.4	protein_coding	2	c.268+38237A>T
2	41233348	T	A	GATKstd	intron_variant	MODIFIER	PPP2R2B	478053	transcript	XM_005617357.3	protein_coding	2	c.37+16478A>T
2	41233348	T	A	GATKstd	intron_variant	MODIFIER	PPP2R2B	478053	transcript	XM_005617360.3	protein_coding	2	c.70+38237A>T
2	41233348	T	A	GATKstd	intron_variant	MODIFIER	PPP2R2B	478053	transcript	XM_022409203.1	protein_coding	2	c.37+16478A>T
2	41233348	T	A	GATKstd	intron_variant	MODIFIER	PPP2R2B	478053	transcript	XM_022409211.1	protein_coding	2	c.37+16478A>T
2	41233348	T	A	GATKstd	intron_variant	MODIFIER	PPP2R2B	478053	transcript	XM_022409181.1	protein_coding	2	c.196+38237A>T
2	41233348	T	A	GATKstd	intron_variant	MODIFIER	PPP2R2B	478053	transcript	XM_005617354.3	protein_coding	1	c.31+81693A>T
2	41233348	T	A	GATKstd	intron_variant	MODIFIER	PPP2R2B	478053	transcript	XM_005617353.3	protein_coding	2	c.238+38237A>T
2	41233348	T	A	GATKstd	intron_variant	MODIFIER	PPP2R2B	478053	transcript	XM_022409200.1	protein_coding	2	c.37+16478A>T
2	41233348	T	A	GATKstd	intron_variant	MODIFIER	PPP2R2B	478053	transcript	XM_003433781.4	protein_coding	1	c.80-121805A>T
2	41233348	T	A	GATKstd	intron_variant	MODIFIER	PPP2R2B	478053	transcript	XM_005617355.3	protein_coding	3	c.37+16478A>T
2	41233348	T	A	GATKstd	intron_variant	MODIFIER	PPP2R2B	478053	transcript	XM_003433782.4	protein_coding	2	c.89-121805A>T
2	41233348	T	A	GATKstd	intron_variant	MODIFIER	PPP2R2B	478053	transcript	XM_003433780.4	protein_coding	3	c.244+38237A>T
2	41233348	T	A	GATKstd	intron_variant	MODIFIER	PPP2R2B	478053	transcript	XM_022409183.1	protein_coding	3	c.176-121805A>T
2	41240821	A	G	GATKstd	intron_variant	MODIFIER	PPP2R2B	478053	transcript	XM_003638915.4	protein_coding	2	c.268+30764T>C
2	41240821	A	G	GATKstd	intron_variant	MODIFIER	PPP2R2B	478053	transcript	XM_005617357.3	protein_coding	2	c.37+9005T>C
2	41240821	A	G	GATKstd	intron_variant	MODIFIER	PPP2R2B	478053	transcript	XM_005617360.3	protein_coding	2	c.70+30764T>C
2	41240821	A	G	GATKstd	intron_variant	MODIFIER	PPP2R2B	478053	transcript	XM_022409203.1	protein_coding	2	c.37+9005T>C
2	41240821	A	G	GATKstd	intron_variant	MODIFIER	PPP2R2B	478053	transcript	XM_022409211.1	protein_coding	2	c.37+9005T>C
2	41240821	A	G	GATKstd	intron_variant	MODIFIER	PPP2R2B	478053	transcript	XM_022409181.1	protein_coding	2	c.196+30764T>C
2	41240821	A	G	GATKstd	intron_variant	MODIFIER	PPP2R2B	478053	transcript	XM_005617354.3	protein_coding	1	c.31+74220T>C
2	41240821	A	G	GATKstd	intron_variant	MODIFIER	PPP2R2B	478053	transcript	XM_005617353.3	protein_coding	2	c.238+30764T>C
2	41240821	A	G	GATKstd	intron_variant	MODIFIER	PPP2R2B	478053	transcript	XM_022409200.1	protein_coding	2	c.37+9005T>C
2	41240821	A	G	GATKstd	intron_variant	MODIFIER	PPP2R2B	478053	transcript	XM_003433781.4	protein_coding	1	c.80-129278T>C
2	41240821	A	G	GATKstd	intron_variant	MODIFIER	PPP2R2B	478053	transcript	XM_005617355.3	protein_coding	3	c.37+9005T>C
2	41240821	A	G	GATKstd	intron_variant	MODIFIER	PPP2R2B	478053	transcript	XM_003433782.4	protein_coding	2	c.89-129278T>C
2	41240821	A	G	GATKstd	intron_variant	MODIFIER	PPP2R2B	478053	transcript	XM_003433780.4	protein_coding	3	c.244+30764T>C
2	41240821	A	G	GATKstd	intron_variant	MODIFIER	PPP2R2B	478053	transcript	XM_022409183.1	protein_coding	3	c.175+116177T>C
2	41248979	T	G	GATKstd	intron_variant	MODIFIER	PPP2R2B	478053	transcript	XM_003638915.4	protein_coding	2	c.268+22606A>C
2	41248979	T	G	GATKstd	intron_variant	MODIFIER	PPP2R2B	478053	transcript	XM_005617357.3	protein_coding	2	c.37+847A>C
2	41248979	T	G	GATKstd	intron_variant	MODIFIER	PPP2R2B	478053	transcript	XM_005617360.3	protein_coding	2	c.70+22606A>C
2	41248979	T	G	GATKstd	intron_variant	MODIFIER	PPP2R2B	478053	transcript	XM_022409203.1	protein_coding	2	c.37+847A>C
2	41248979	T	G	GATKstd	intron_variant	MODIFIER	PPP2R2B	478053	transcript	XM_022409211.1	protein_coding	2	c.37+847A>C
2	41248979	T	G	GATKstd	intron_variant	MODIFIER	PPP2R2B	478053	transcript	XM_022409181.1	protein_coding	2	c.196+22606A>C
2	41248979	T	G	GATKstd	intron_variant	MODIFIER	PPP2R2B	478053	transcript	XM_005617354.3	protein_coding	1	c.31+66062A>C
2	41248979	T	G	GATKstd	intron_variant	MODIFIER	PPP2R2B	478053	transcript	XM_005617353.3	protein_coding	2	c.238+22606A>C
2	41248979	T	G	GATKstd	intron_variant	MODIFIER	PPP2R2B	478053	transcript	XM_022409200.1	protein_coding	2	c.37+847A>C
2	41248979	T	G	GATKstd	intron_variant	MODIFIER	PPP2R2B	478053	transcript	XM_003433781.4	protein_coding	1	c.80-137436A>C
2	41248979	T	G	GATKstd	intron_variant	MODIFIER	PPP2R2B	478053	transcript	XM_005617355.3	protein_coding	3	c.37+847A>C
2	41248979	T	G	GATKstd	intron_variant	MODIFIER	PPP2R2B	478053	transcript	XM_003433782.4	protein_coding	2	c.89-137436A>C
2	41248979	T	G	GATKstd	intron_variant	MODIFIER	PPP2R2B	478053	transcript	XM_003433780.4	protein_coding	3	c.244+22606A>C
2	41248979	T	G	GATKstd	intron_variant	MODIFIER	PPP2R2B	478053	transcript	XM_022409183.1	protein_coding	3	c.175+108019A>C
2	41254023	C	T	GATKstd	intron_variant	MODIFIER	PPP2R2B	478053	transcript	XM_003638915.4	protein_coding	2	c.268+17562G>A
2	41254023	C	T	GATKstd	intron_variant	MODIFIER	PPP2R2B	478053	transcript	XM_005617357.3	protein_coding	1	c.-48-4113G>A
2	41254023	C	T	GATKstd	intron_variant	MODIFIER	PPP2R2B	478053	transcript	XM_005617360.3	protein_coding	2	c.70+17562G>A
2	41254023	C	T	GATKstd	intron_variant	MODIFIER	PPP2R2B	478053	transcript	XM_022409203.1	protein_coding	1	c.-48-4113G>A
2	41254023	C	T	GATKstd	intron_variant	MODIFIER	PPP2R2B	478053	transcript	XM_022409211.1	protein_coding	1	c.-48-4113G>A
2	41254023	C	T	GATKstd	intron_variant	MODIFIER	PPP2R2B	478053	transcript	XM_022409181.1	protein_coding	2	c.196+17562G>A
2	41254023	C	T	GATKstd	intron_variant	MODIFIER	PPP2R2B	478053	transcript	XM_005617354.3	protein_coding	1	c.31+61018G>A
2	41254023	C	T	GATKstd	intron_variant	MODIFIER	PPP2R2B	478053	transcript	XM_005617353.3	protein_coding	2	c.238+17562G>A
2	41254023	C	T	GATKstd	intron_variant	MODIFIER	PPP2R2B	478053	transcript	XM_022409200.1	protein_coding	1	c.-48-4113G>A
2	41254023	C	T	GATKstd	intron_variant	MODIFIER	PPP2R2B	478053	transcript	XM_003433781.4	protein_coding	1	c.80-142480G>A
2	41254023	C	T	GATKstd	intron_variant	MODIFIER	PPP2R2B	478053	transcript	XM_005617355.3	protein_coding	2	c.-48-4113G>A
2	41254023	C	T	GATKstd	intron_variant	MODIFIER	PPP2R2B	478053	transcript	XM_003433782.4	protein_coding	2	c.89-142480G>A
2	41254023	C	T	GATKstd	intron_variant	MODIFIER	PPP2R2B	478053	transcript	XM_003433780.4	protein_coding	3	c.244+17562G>A
2	41254023	C	T	GATKstd	intron_variant	MODIFIER	PPP2R2B	478053	transcript	XM_022409183.1	protein_coding	3	c.175+102975G>A
2	41265085	A	G	GATKstd	intron_variant	MODIFIER	PPP2R2B	478053	transcript	XM_003638915.4	protein_coding	2	c.268+6500T>C
2	41265085	A	G	GATKstd	intron_variant	MODIFIER	PPP2R2B	478053	transcript	XM_005617357.3	protein_coding	1	c.-49+6500T>C
2	41265085	A	G	GATKstd	intron_variant	MODIFIER	PPP2R2B	478053	transcript	XM_005617360.3	protein_coding	2	c.70+6500T>C
2	41265085	A	G	GATKstd	intron_variant	MODIFIER	PPP2R2B	478053	transcript	XM_022409203.1	protein_coding	1	c.-48-15175T>C
2	41265085	A	G	GATKstd	intron_variant	MODIFIER	PPP2R2B	478053	transcript	XM_022409211.1	protein_coding	1	c.-48-15175T>C
2	41265085	A	G	GATKstd	intron_variant	MODIFIER	PPP2R2B	478053	transcript	XM_022409181.1	protein_coding	2	c.196+6500T>C
2	41265085	A	G	GATKstd	intron_variant	MODIFIER	PPP2R2B	478053	transcript	XM_005617354.3	protein_coding	1	c.31+49956T>C
2	41265085	A	G	GATKstd	intron_variant	MODIFIER	PPP2R2B	478053	transcript	XM_005617353.3	protein_coding	2	c.238+6500T>C
2	41265085	A	G	GATKstd	intron_variant	MODIFIER	PPP2R2B	478053	transcript	XM_022409200.1	protein_coding	1	c.-48-15175T>C
2	41265085	A	G	GATKstd	intron_variant	MODIFIER	PPP2R2B	478053	transcript	XM_003433781.4	protein_coding	1	c.80-153542T>C
2	41265085	A	G	GATKstd	intron_variant	MODIFIER	PPP2R2B	478053	transcript	XM_005617355.3	protein_coding	2	c.-48-15175T>C
2	41265085	A	G	GATKstd	intron_variant	MODIFIER	PPP2R2B	478053	transcript	XM_003433782.4	protein_coding	2	c.89-153542T>C
2	41265085	A	G	GATKstd	intron_variant	MODIFIER	PPP2R2B	478053	transcript	XM_003433780.4	protein_coding	3	c.244+6500T>C
2	41265085	A	G	GATKstd	intron_variant	MODIFIER	PPP2R2B	478053	transcript	XM_022409183.1	protein_coding	3	c.175+91913T>C
2	41268425	TG	T	PASS	intron_variant	MODIFIER	PPP2R2B	478053	transcript	XM_003638915.4	protein_coding	2	c.268+3159delC
2	41268425	TG	T	PASS	intron_variant	MODIFIER	PPP2R2B	478053	transcript	XM_005617357.3	protein_coding	1	c.-49+3159delC
2	41268425	TG	T	PASS	intron_variant	MODIFIER	PPP2R2B	478053	transcript	XM_005617360.3	protein_coding	2	c.70+3159delC
2	41268425	TG	T	PASS	intron_variant	MODIFIER	PPP2R2B	478053	transcript	XM_022409203.1	protein_coding	1	c.-48-18516delC
2	41268425	TG	T	PASS	intron_variant	MODIFIER	PPP2R2B	478053	transcript	XM_022409211.1	protein_coding	1	c.-48-18516delC
2	41268425	TG	T	PASS	intron_variant	MODIFIER	PPP2R2B	478053	transcript	XM_022409181.1	protein_coding	2	c.196+3159delC
2	41268425	TG	T	PASS	intron_variant	MODIFIER	PPP2R2B	478053	transcript	XM_005617354.3	protein_coding	1	c.31+46615delC
2	41268425	TG	T	PASS	intron_variant	MODIFIER	PPP2R2B	478053	transcript	XM_005617353.3	protein_coding	2	c.238+3159delC
2	41268425	TG	T	PASS	intron_variant	MODIFIER	PPP2R2B	478053	transcript	XM_022409200.1	protein_coding	1	c.-48-18516delC
2	41268425	TG	T	PASS	intron_variant	MODIFIER	PPP2R2B	478053	transcript	XM_003433781.4	protein_coding	1	c.79+151689delC
2	41268425	TG	T	PASS	intron_variant	MODIFIER	PPP2R2B	478053	transcript	XM_005617355.3	protein_coding	2	c.-48-18516delC
2	41268425	TG	T	PASS	intron_variant	MODIFIER	PPP2R2B	478053	transcript	XM_003433782.4	protein_coding	2	c.89-156883delC
2	41268425	TG	T	PASS	intron_variant	MODIFIER	PPP2R2B	478053	transcript	XM_003433780.4	protein_coding	3	c.244+3159delC
2	41268425	TG	T	PASS	intron_variant	MODIFIER	PPP2R2B	478053	transcript	XM_022409183.1	protein_coding	3	c.175+88572delC
2	41271190	C	T	GATKstd	intron_variant	MODIFIER	PPP2R2B	478053	transcript	XM_003638915.4	protein_coding	2	c.268+395G>A
2	41271190	C	T	GATKstd	intron_variant	MODIFIER	PPP2R2B	478053	transcript	XM_005617357.3	protein_coding	1	c.-49+395G>A
2	41271190	C	T	GATKstd	intron_variant	MODIFIER	PPP2R2B	478053	transcript	XM_005617360.3	protein_coding	2	c.70+395G>A
2	41271190	C	T	GATKstd	intron_variant	MODIFIER	PPP2R2B	478053	transcript	XM_022409203.1	protein_coding	1	c.-48-21280G>A
2	41271190	C	T	GATKstd	intron_variant	MODIFIER	PPP2R2B	478053	transcript	XM_022409211.1	protein_coding	1	c.-48-21280G>A
2	41271190	C	T	GATKstd	intron_variant	MODIFIER	PPP2R2B	478053	transcript	XM_022409181.1	protein_coding	2	c.196+395G>A
2	41271190	C	T	GATKstd	intron_variant	MODIFIER	PPP2R2B	478053	transcript	XM_005617354.3	protein_coding	1	c.31+43851G>A
2	41271190	C	T	GATKstd	intron_variant	MODIFIER	PPP2R2B	478053	transcript	XM_005617353.3	protein_coding	2	c.238+395G>A
2	41271190	C	T	GATKstd	intron_variant	MODIFIER	PPP2R2B	478053	transcript	XM_022409200.1	protein_coding	1	c.-48-21280G>A
2	41271190	C	T	GATKstd	intron_variant	MODIFIER	PPP2R2B	478053	transcript	XM_003433781.4	protein_coding	1	c.79+148925G>A
2	41271190	C	T	GATKstd	intron_variant	MODIFIER	PPP2R2B	478053	transcript	XM_005617355.3	protein_coding	2	c.-48-21280G>A
2	41271190	C	T	GATKstd	intron_variant	MODIFIER	PPP2R2B	478053	transcript	XM_003433782.4	protein_coding	2	c.89-159647G>A
2	41271190	C	T	GATKstd	intron_variant	MODIFIER	PPP2R2B	478053	transcript	XM_003433780.4	protein_coding	3	c.244+395G>A
2	41271190	C	T	GATKstd	intron_variant	MODIFIER	PPP2R2B	478053	transcript	XM_022409183.1	protein_coding	3	c.175+85808G>A
2	41380446	C	T	GATKstd	intron_variant	MODIFIER	PPP2R2B	478053	transcript	XM_003638915.4	protein_coding	1	c.74+39669G>A
2	41380446	C	T	GATKstd	intron_variant	MODIFIER	PPP2R2B	478053	transcript	XM_003433781.4	protein_coding	1	c.79+39669G>A
2	41380446	C	T	GATKstd	intron_variant	MODIFIER	PPP2R2B	478053	transcript	XM_005617355.3	protein_coding	2	c.-49+66183G>A
2	41380446	C	T	GATKstd	intron_variant	MODIFIER	PPP2R2B	478053	transcript	XM_003433782.4	protein_coding	2	c.88+66183G>A
2	41380446	C	T	GATKstd	intron_variant	MODIFIER	PPP2R2B	478053	transcript	XM_003433780.4	protein_coding	2	c.50+66183G>A
2	41380446	C	T	GATKstd	intron_variant	MODIFIER	PPP2R2B	478053	transcript	XM_022409183.1	protein_coding	2	c.89-23362G>A
2	41766569	C	A	GATKstd	intron_variant	MODIFIER	DPYSL3	487204	transcript	XM_014108278.2	protein_coding	1	c.48+42771G>T
2	42691832	C	T	GATKstd	intron_variant	MODIFIER	SKIV2L2	607950	transcript	XM_022409389.1	protein_coding	13	c.1366-391C>T
2	42691832	C	T	GATKstd	intron_variant	MODIFIER	SKIV2L2	607950	transcript	XM_844583.5	protein_coding	12	c.1321-391C>T
2	43039083	G	A	GATKstd	intron_variant	MODIFIER	DDX4	487211	transcript	XM_005617393.2	protein_coding	3	c.133+2325G>A
2	43039083	G	A	GATKstd	intron_variant	MODIFIER	DDX4	487211	transcript	XM_005617394.2	protein_coding	3	c.133+2325G>A
2	43039083	G	A	GATKstd	intron_variant	MODIFIER	DDX4	487211	transcript	XM_022409469.1	protein_coding	3	c.133+2325G>A
2	43039083	G	A	GATKstd	intron_variant	MODIFIER	DDX4	487211	transcript	XM_005617395.2	protein_coding	3	c.133+2325G>A
2	43967684	C	T	GATKstd	intron_variant	MODIFIER	MAP3K1	478061	transcript	XM_535240.6	protein_coding	3	c.834+1587C>T
2	44307511	AT	A	PASS	intron_variant	MODIFIER	GPBP1	478062	transcript	XM_005617405.3	protein_coding	11	c.1221-2442delT
2	44307511	AT	A	PASS	intron_variant	MODIFIER	GPBP1	478062	transcript	XM_535241.6	protein_coding	11	c.1221-2442delT
2	44307511	AT	A	PASS	intron_variant	MODIFIER	GPBP1	478062	transcript	XM_005617406.3	protein_coding	11	c.1221-2442delT
2	44307511	AT	A	PASS	intron_variant	MODIFIER	GPBP1	478062	transcript	XM_005617407.3	protein_coding	10	c.1161-2442delT
2	45824969	C	T	GATKstd	intergenic_region	MODIFIER	LOC100684090-PDE4D	100684090-487221	intergenic_region	100684090-487221		-1	n.45824969C>T
2	45961536	T	TTTC	PASS	intron_variant	MODIFIER	PDE4D	487221	transcript	XM_022415225.1	protein_coding	5	c.809-66121_809-66120insGAA
2	45961536	T	TTTC	PASS	intron_variant	MODIFIER	PDE4D	487221	transcript	XM_014106806.2	protein_coding	1	c.46+669_46+670insGAA
2	45961536	T	TTTC	PASS	intron_variant	MODIFIER	PDE4D	487221	transcript	XM_003433805.4	protein_coding	5	c.419-66121_419-66120insGAA
2	45961536	T	TTTC	PASS	intron_variant	MODIFIER	PDE4D	487221	transcript	XM_003433806.4	protein_coding	5	c.443-66121_443-66120insGAA
2	45961536	T	TTTC	PASS	intron_variant	MODIFIER	PDE4D	487221	transcript	XM_005617420.3	protein_coding	5	c.479-66121_479-66120insGAA
2	45961536	T	TTTC	PASS	intron_variant	MODIFIER	PDE4D	487221	transcript	XM_003433804.4	protein_coding	5	c.401-66121_401-66120insGAA
2	45961536	T	TTTC	PASS	intron_variant	MODIFIER	PDE4D	487221	transcript	XM_005617421.3	protein_coding	5	c.410-66121_410-66120insGAA
2	45961536	T	TTTC	PASS	intron_variant	MODIFIER	PDE4D	487221	transcript	XM_003433803.4	protein_coding	5	c.620-66121_620-66120insGAA
2	45961536	T	TTTC	PASS	intron_variant	MODIFIER	PDE4D	487221	transcript	XM_005617415.2	protein_coding	6	c.680-66121_680-66120insGAA
2	45961536	T	TTTC	PASS	intron_variant	MODIFIER	PDE4D	487221	transcript	XM_022415243.1	protein_coding	9	c.626-66121_626-66120insGAA
2	45961536	T	TTTC	PASS	intron_variant	MODIFIER	PDE4D	487221	transcript	XM_022415245.1	protein_coding	11	c.626-66121_626-66120insGAA
2	45961536	T	TTTC	PASS	intron_variant	MODIFIER	PDE4D	487221	transcript	XM_014106762.2	protein_coding	8	c.626-66121_626-66120insGAA
2	45961536	T	TTTC	PASS	intron_variant	MODIFIER	PDE4D	487221	transcript	XM_014106770.2	protein_coding	7	c.626-66121_626-66120insGAA
2	45961536	T	TTTC	PASS	intron_variant	MODIFIER	PDE4D	487221	transcript	XM_005617416.3	protein_coding	9	c.626-66121_626-66120insGAA
2	45961536	T	TTTC	PASS	intron_variant	MODIFIER	PDE4D	487221	transcript	XM_005617417.3	protein_coding	8	c.626-66121_626-66120insGAA
2	45961536	T	TTTC	PASS	intron_variant	MODIFIER	PDE4D	487221	transcript	XM_022415235.1	protein_coding	10	c.626-66121_626-66120insGAA
2	46133488	G	A	PASS	intron_variant	MODIFIER	PDE4D	487221	transcript	XM_022415225.1	protein_coding	1	c.456-62997C>T
2	46133488	G	A	PASS	intron_variant	MODIFIER	LOC111094481	111094481	transcript	XR_002623794.1	pseudogene	1	n.336+5987G>A
2	46133488	G	A	PASS	intron_variant	MODIFIER	PDE4D	487221	transcript	XM_003433806.4	protein_coding	1	c.89+60674C>T
2	46133488	G	A	PASS	intron_variant	MODIFIER	PDE4D	487221	transcript	XM_005617420.3	protein_coding	1	c.126-62997C>T
2	46133488	G	A	PASS	intron_variant	MODIFIER	PDE4D	487221	transcript	XM_003433804.4	protein_coding	1	c.48-62997C>T
2	46133488	G	A	PASS	intron_variant	MODIFIER	PDE4D	487221	transcript	XM_005617421.3	protein_coding	1	c.57-62997C>T
2	46133488	G	A	PASS	intron_variant	MODIFIER	PDE4D	487221	transcript	XM_003433803.4	protein_coding	1	c.267-62997C>T
2	46133488	G	A	PASS	intron_variant	MODIFIER	PDE4D	487221	transcript	XM_005617415.2	protein_coding	2	c.327-62997C>T
2	46133488	G	A	PASS	intron_variant	MODIFIER	PDE4D	487221	transcript	XM_022415243.1	protein_coding	5	c.273-62997C>T
2	46133488	G	A	PASS	intron_variant	MODIFIER	PDE4D	487221	transcript	XM_022415245.1	protein_coding	7	c.273-62997C>T
2	46133488	G	A	PASS	intron_variant	MODIFIER	PDE4D	487221	transcript	XM_014106762.2	protein_coding	4	c.273-62997C>T
2	46133488	G	A	PASS	intron_variant	MODIFIER	PDE4D	487221	transcript	XM_014106770.2	protein_coding	3	c.273-62997C>T
2	46133488	G	A	PASS	intron_variant	MODIFIER	PDE4D	487221	transcript	XM_005617416.3	protein_coding	5	c.273-62997C>T
2	46133488	G	A	PASS	intron_variant	MODIFIER	PDE4D	487221	transcript	XM_005617417.3	protein_coding	4	c.273-62997C>T
2	46133488	G	A	PASS	intron_variant	MODIFIER	PDE4D	487221	transcript	XM_022415235.1	protein_coding	6	c.273-62997C>T
2	48101769	C	T	PASS	intergenic_region	MODIFIER	ZSWIM6-LOC111092336	478068-111092336	intergenic_region	478068-111092336		-1	n.48101769C>T
2	48200610	C	T	GATKstd	intergenic_region	MODIFIER	ZSWIM6-LOC111092336	478068-111092336	intergenic_region	478068-111092336		-1	n.48200610C>T
2	49799550	C	CCCCCCCG	PASS	intron_variant	MODIFIER	LOC111094653	111094653	transcript	XR_002624062.1	pseudogene	2	n.306+493_306+494insCCCCCCG
2	51352851	G	A	PASS	intron_variant	MODIFIER	TRIM23	487232	transcript	XM_544360.6	protein_coding	2	c.245-197C>T
2	51352851	G	A	PASS	intron_variant	MODIFIER	TRIM23	487232	transcript	XM_014108751.2	protein_coding	2	c.245-197C>T
2	52331879	G	A	PASS	intron_variant	MODIFIER	MAST4	612904	transcript	XM_022414764.1	protein_coding	2	c.253-43884G>A
2	52456066	G	T	GATKstd	intron_variant	MODIFIER	MAST4	612904	transcript	XM_022414764.1	protein_coding	4	c.320+65739G>T
2	52631587	G	A	GATKstd	synonymous_variant	LOW	MAST4	612904	transcript	XM_022414764.1	protein_coding	29	c.4281G>A	p.Pro1427Pro
2	52801083	CA	C	PASS	intron_variant	MODIFIER	LOC111092486	111092486	transcript	XR_002619477.1	pseudogene	4	n.417+29271delA
2	52801083	CA	C	PASS	intron_variant	MODIFIER	LOC111092486	111092486	transcript	XR_002619480.1	pseudogene	4	n.417+29271delA
2	52801083	CA	C	PASS	intron_variant	MODIFIER	LOC111092486	111092486	transcript	XR_002619468.1	pseudogene	4	n.417+29271delA
2	52801083	CA	C	PASS	intron_variant	MODIFIER	LOC111092486	111092486	transcript	XR_002619470.1	pseudogene	4	n.417+29271delA
2	52801083	CA	C	PASS	intron_variant	MODIFIER	LOC111092486	111092486	transcript	XR_002619469.1	pseudogene	4	n.417+29271delA
2	52801083	CA	C	PASS	intron_variant	MODIFIER	LOC111092486	111092486	transcript	XR_002619471.1	pseudogene	4	n.444+29271delA
2	53098645	T	A	GATKstd	intron_variant	MODIFIER	LOC111092486	111092486	transcript	XR_002619477.1	pseudogene	11	n.1069-16319T>A
2	53098645	T	A	GATKstd	intron_variant	MODIFIER	LOC111092486	111092486	transcript	XR_002619468.1	pseudogene	10	n.1009-16319T>A
2	53098645	T	A	GATKstd	intron_variant	MODIFIER	LOC111092486	111092486	transcript	XR_002619470.1	pseudogene	10	n.1009-16319T>A
2	53098645	T	A	GATKstd	intron_variant	MODIFIER	LOC111092486	111092486	transcript	XR_002619469.1	pseudogene	10	n.1009-16319T>A
2	53098645	T	A	GATKstd	intron_variant	MODIFIER	LOC111092486	111092486	transcript	XR_002619471.1	pseudogene	10	n.1036-16319T>A
2	53299176	T	A	PASS	intergenic_region	MODIFIER	LOC111094657-LOC111092497	111094657-111092497	intergenic_region	111094657-111092497		-1	n.53299176T>A
2	53679342	C	A	GATKstd	downstream_gene_variant	MODIFIER	LOC111092499	111092499	transcript	XR_002619495.1	pseudogene	-1	n.*4962C>A
2	53679342	C	A	GATKstd	intergenic_region	MODIFIER	LOC111092499-LOC111092508	111092499-111092508	intergenic_region	111092499-111092508		-1	n.53679342C>A
2	53720186	C	T	GATKstd	intergenic_region	MODIFIER	LOC111092499-LOC111092508	111092499-111092508	intergenic_region	111092499-111092508		-1	n.53720186C>T
2	53999573	G	T	PASS	intergenic_region	MODIFIER	LOC111092510-LOC106557944	111092510-106557944	intergenic_region	111092510-106557944		-1	n.53999573G>T
2	54247271	A	G	GATKstd	downstream_gene_variant	MODIFIER	SLC30A5	487237	transcript	XM_845257.5	protein_coding	-1	c.*5490A>G
2	54247271	A	G	GATKstd	intergenic_region	MODIFIER	SLC30A5-CCNB1	487237-608420	intergenic_region	487237-608420		-1	n.54247271A>G
2	54563254	G	A	PASS	intron_variant	MODIFIER	GTF2H2	478089	transcript	XM_005617466.3	protein_coding	8	c.364+1075G>A
2	54563254	G	A	PASS	intron_variant	MODIFIER	GTF2H2	478089	transcript	XM_535266.6	protein_coding	8	c.364+1075G>A
2	54563254	G	A	PASS	intron_variant	MODIFIER	GTF2H2	478089	transcript	XM_022410307.1	protein_coding	7	c.364+1075G>A
2	54843463	G	A	PASS	intergenic_region	MODIFIER	MCCC2-CARTPT	478091-610236	intergenic_region	478091-610236		-1	n.54843463G>A
2	56806860	CCCCCTTGGCCTCACCTGTGCAGAGGGAGATGCTGTGCCCTGTGATTGGATGGAGGGACGAGGGACCCT	C	PASS	intergenic_region	MODIFIER	ARHGEF28-ENC1	487245-487247	intergenic_region	487245-487247		-1	n.56806861_56806928delCCCCTTGGCCTCACCTGTGCAGAGGGAGATGCTGTGCCCTGTGATTGGATGGAGGGACGAGGGACCCT
2	58904272	G	T	GATKstd	upstream_gene_variant	MODIFIER	CCDC102A	487263	transcript	XM_022414798.1	protein_coding	-1	c.-2900G>T
2	58904272	G	T	GATKstd	intergenic_region	MODIFIER	ADGRG5-CCDC102A	100686072-487263	intergenic_region	100686072-487263		-1	n.58904272G>T
2	73172696	A	AGCTCCTAGCTCCACCAGCAACAGCACTGCCTGTTTCTAGGTGTGATTTTAAAAAAATAAAGCATTCCTCCATCACTTGAGGTGGGGGCGGGGGCTGAGGGGACGACAGGAGCTCCCGGGGCG	PASS	upstream_gene_variant	MODIFIER	LOC111093316	111093316	transcript	XR_002621303.1	pseudogene	-1	n.-5_-4insCGCCCCGGGAGCTCCTGTCGTCCCCTCAGCCCCCGCCCCCACCTCAAGTGATGGAGGAATGCTTTATTTTTTTAAAATCACACCTAGAAACAGGCAGTGCTGTTGCTGGTGGAGCTAGGAGC
2	73172696	A	AGCTCCTAGCTCCACCAGCAACAGCACTGCCTGTTTCTAGGTGTGATTTTAAAAAAATAAAGCATTCCTCCATCACTTGAGGTGGGGGCGGGGGCTGAGGGGACGACAGGAGCTCCCGGGGCG	PASS	intergenic_region	MODIFIER	LOC111093316-KDF1	111093316-612121	intergenic_region	111093316-612121		-1	n.73172696_73172697insGCTCCTAGCTCCACCAGCAACAGCACTGCCTGTTTCTAGGTGTGATTTTAAAAAAATAAAGCATTCCTCCATCACTTGAGGTGGGGGCGGGGGCTGAGGGGACGACAGGAGCTCCCGGGGCG
30	9732978	C	CGGGAGCAGCTCGGGGGGGGGGGGGCTCGGGGGCGGCTCCGCGGAGGGGGCTGCAGGGT	PASS	intron_variant	MODIFIER	TTBK2	487520	transcript	XM_005638315.3	protein_coding	6	c.538-2875_538-2874insACCCTGCAGCCCCCTCCGCGGAGCCGCCCCCGAGCCCCCCCCCCCCCGAGCTGCTCCC
30	9732978	C	CGGGAGCAGCTCGGGGGGGGGGGGGCTCGGGGGCGGCTCCGCGGAGGGGGCTGCAGGGT	PASS	intron_variant	MODIFIER	TTBK2	487520	transcript	XM_005638317.3	protein_coding	5	c.259-2875_259-2874insACCCTGCAGCCCCCTCCGCGGAGCCGCCCCCGAGCCCCCCCCCCCCCGAGCTGCTCCC
30	9732978	C	CGGGAGCAGCTCGGGGGGGGGGGGGCTCGGGGGCGGCTCCGCGGAGGGGGCTGCAGGGT	PASS	intron_variant	MODIFIER	TTBK2	487520	transcript	XM_005638316.3	protein_coding	5	c.259-2875_259-2874insACCCTGCAGCCCCCTCCGCGGAGCCGCCCCCGAGCCCCCCCCCCCCCGAGCTGCTCCC
30	9732978	C	CGGGAGCAGCTCGGGGGGGGGGGGGCTCGGGGGCGGCTCCGCGGAGGGGGCTGCAGGGT	PASS	intron_variant	MODIFIER	TTBK2	487520	transcript	XM_022412910.1	protein_coding	6	c.259-2875_259-2874insACCCTGCAGCCCCCTCCGCGGAGCCGCCCCCGAGCCCCCCCCCCCCCGAGCTGCTCCC
30	9732978	C	CGGGAGCAGCTCGGGGGGGGGGGGGCTCGGGGGCGGCTCCGCGGAGGGGGCTGCAGGGT	PASS	intron_variant	MODIFIER	TTBK2	487520	transcript	XM_022412911.1	protein_coding	6	c.94-2875_94-2874insACCCTGCAGCCCCCTCCGCGGAGCCGCCCCCGAGCCCCCCCCCCCCCGAGCTGCTCCC
30	9732978	C	CGGGAGCAGCTCGGGGGGGGGGGGGCTCGGGGGCGGCTCCGCGGAGGGGGCTGCAGGGT	PASS	intron_variant	MODIFIER	TTBK2	487520	transcript	XM_544644.6	protein_coding	6	c.538-2875_538-2874insACCCTGCAGCCCCCTCCGCGGAGCCGCCCCCGAGCCCCCCCCCCCCCGAGCTGCTCCC
30	12394638	A	T	GATKstd	intergenic_region	MODIFIER	LOC100684464-LOC111093394	100684464-111093394	intergenic_region	100684464-111093394		-1	n.12394638A>T
30	15312848	A	AGCTTCTTATCTTAAAAAAAAAAAAAAAAAAAAAAAAAAAAT	PASS	intergenic_region	MODIFIER	SECISBP2L-COPS2	487547-478295	intergenic_region	487547-478295		-1	n.15312848_15312849insGCTTCTTATCTTAAAAAAAAAAAAAAAAAAAAAAAAAAAAT
30	24318079	GTC	G	PASS	intergenic_region	MODIFIER	MYO1E-FAM81A	478325-478326	intergenic_region	478325-478326		-1	n.24318080_24318081delTC
30	28820369	G	A	GATKstd	intron_variant	MODIFIER	CSNK1G1	478338	transcript	XM_022412861.1	protein_coding	1	c.-269+11335C>T
30	28820369	G	A	GATKstd	intron_variant	MODIFIER	CSNK1G1	478338	transcript	XM_022412864.1	protein_coding	1	c.-269+4619C>T
30	28820369	G	A	GATKstd	intron_variant	MODIFIER	CSNK1G1	478338	transcript	XM_022412862.1	protein_coding	1	c.-269+6079C>T
30	28820369	G	A	GATKstd	intron_variant	MODIFIER	CSNK1G1	478338	transcript	XM_022412866.1	protein_coding	1	c.-220+6079C>T
30	28820369	G	A	GATKstd	intron_variant	MODIFIER	CSNK1G1	478338	transcript	XM_022412865.1	protein_coding	1	c.-220+11335C>T
30	28820369	G	A	GATKstd	intron_variant	MODIFIER	CSNK1G1	478338	transcript	XM_022412873.1	protein_coding	1	c.-269+11335C>T
30	28820369	G	A	GATKstd	intron_variant	MODIFIER	CSNK1G1	478338	transcript	XM_022412870.1	protein_coding	1	c.-269+11335C>T
30	28820369	G	A	GATKstd	intron_variant	MODIFIER	CSNK1G1	478338	transcript	XM_022412875.1	protein_coding	1	c.-269+11335C>T
30	28820369	G	A	GATKstd	intron_variant	MODIFIER	CSNK1G1	478338	transcript	XM_022412874.1	protein_coding	1	c.-269+11335C>T
30	28820369	G	A	GATKstd	intron_variant	MODIFIER	CSNK1G1	478338	transcript	XM_022412880.1	protein_coding	1	c.-269+11335C>T
30	28820369	G	A	GATKstd	intron_variant	MODIFIER	CSNK1G1	478338	transcript	XM_014109535.2	protein_coding	1	c.-269+11335C>T
30	28820369	G	A	GATKstd	intron_variant	MODIFIER	CSNK1G1	478338	transcript	XM_022412885.1	protein_coding	1	c.-269+11335C>T
30	28820369	G	A	GATKstd	intron_variant	MODIFIER	CSNK1G1	478338	transcript	XM_014109531.2	protein_coding	1	c.-269+11335C>T
30	28820369	G	A	GATKstd	intron_variant	MODIFIER	CSNK1G1	478338	transcript	XM_022412881.1	protein_coding	1	c.-269+11335C>T
30	28820369	G	A	GATKstd	intron_variant	MODIFIER	CSNK1G1	478338	transcript	XM_014109533.2	protein_coding	1	c.-269+11335C>T
30	28820369	G	A	GATKstd	intron_variant	MODIFIER	CSNK1G1	478338	transcript	XM_014109532.2	protein_coding	1	c.-269+11335C>T
30	28820369	G	A	GATKstd	intron_variant	MODIFIER	CSNK1G1	478338	transcript	XM_014109534.2	protein_coding	1	c.-269+11335C>T
30	28820369	G	A	GATKstd	intron_variant	MODIFIER	CSNK1G1	478338	transcript	XM_014109530.2	protein_coding	1	c.-269+11335C>T
30	28820369	G	A	GATKstd	intron_variant	MODIFIER	CSNK1G1	478338	transcript	XM_022412876.1	protein_coding	1	c.-269+11335C>T
30	28820369	G	A	GATKstd	intron_variant	MODIFIER	CSNK1G1	478338	transcript	XM_022412867.1	protein_coding	1	c.-269+11335C>T
30	28820369	G	A	GATKstd	intron_variant	MODIFIER	CSNK1G1	478338	transcript	XM_022412872.1	protein_coding	1	c.-269+11335C>T
30	28820369	G	A	GATKstd	intron_variant	MODIFIER	CSNK1G1	478338	transcript	XM_022412879.1	protein_coding	1	c.-269+11335C>T
30	28820369	G	A	GATKstd	intron_variant	MODIFIER	CSNK1G1	478338	transcript	XR_002621431.1	pseudogene	1	n.488+11335C>T
30	28820369	G	A	GATKstd	intron_variant	MODIFIER	CSNK1G1	478338	transcript	XM_022412869.1	protein_coding	1	c.-269+11335C>T
30	28820369	G	A	GATKstd	intron_variant	MODIFIER	CSNK1G1	478338	transcript	XM_022412878.1	protein_coding	1	c.-269+11335C>T
30	28820369	G	A	GATKstd	intron_variant	MODIFIER	CSNK1G1	478338	transcript	XM_022412871.1	protein_coding	1	c.-269+11335C>T
30	28820369	G	A	GATKstd	intron_variant	MODIFIER	CSNK1G1	478338	transcript	XM_022412886.1	protein_coding	1	c.-269+11335C>T
30	28820369	G	A	GATKstd	intron_variant	MODIFIER	CSNK1G1	478338	transcript	XM_022412883.1	protein_coding	1	c.-269+11335C>T
30	28820369	G	A	GATKstd	intron_variant	MODIFIER	CSNK1G1	478338	transcript	XM_022412882.1	protein_coding	1	c.-269+11335C>T
30	28820369	G	A	GATKstd	intron_variant	MODIFIER	CSNK1G1	478338	transcript	XM_022412877.1	protein_coding	1	c.-269+11335C>T
30	28820369	G	A	GATKstd	intron_variant	MODIFIER	CSNK1G1	478338	transcript	XR_002621432.1	pseudogene	1	n.487+11335C>T
30	31159293	T	TCCCCCCCCCCCCCCCCCGCATA	PASS	intergenic_region	MODIFIER	LOC111093346-SMAD3	111093346-610902	intergenic_region	111093346-610902		-1	n.31159293_31159294insCCCCCCCCCCCCCCCCCGCATA
30	32046152	C	T	GATKstd	intergenic_region	MODIFIER	SKOR1-PIAS1	610933-478350	intergenic_region	610933-478350		-1	n.32046152C>T
30	35202634	C	T	PASS	upstream_gene_variant	MODIFIER	LOC487628	487628	transcript	XM_022412902.1	protein_coding	-1	c.-48607C>T
30	35202634	C	T	PASS	intron_variant	MODIFIER	LOC487628	487628	transcript	XM_014109562.2	protein_coding	1	c.72+45582C>T
30	35261500	A	G	PASS	intron_variant	MODIFIER	LOC487628	487628	transcript	XM_014109562.2	protein_coding	2	c.277+10235A>G
30	35261500	A	G	PASS	intron_variant	MODIFIER	LOC487628	487628	transcript	XM_022412902.1	protein_coding	2	c.25+10235A>G
30	35288033	C	T	GATKstd	intron_variant	MODIFIER	LOC487628	487628	transcript	XM_014109562.2	protein_coding	2	c.278-23557C>T
30	35288033	C	T	GATKstd	intron_variant	MODIFIER	LOC487628	487628	transcript	XM_022412902.1	protein_coding	2	c.26-23557C>T
30	35476249	G	A	PASS	intron_variant	MODIFIER	MYO9A	487630	transcript	XM_022412825.1	protein_coding	22	c.3000+932C>T
30	35476249	G	A	PASS	intron_variant	MODIFIER	MYO9A	487630	transcript	XM_022412826.1	protein_coding	22	c.3000+932C>T
30	35476249	G	A	PASS	intron_variant	MODIFIER	MYO9A	487630	transcript	XM_022412827.1	protein_coding	22	c.3000+932C>T
30	35476249	G	A	PASS	intron_variant	MODIFIER	MYO9A	487630	transcript	XM_022412828.1	protein_coding	21	c.2943+932C>T
30	35476249	G	A	PASS	intron_variant	MODIFIER	MYO9A	487630	transcript	XM_022412829.1	protein_coding	21	c.2880+932C>T
30	35476249	G	A	PASS	intron_variant	MODIFIER	MYO9A	487630	transcript	XM_022412830.1	protein_coding	22	c.3000+932C>T
30	35476249	G	A	PASS	intron_variant	MODIFIER	MYO9A	487630	transcript	XM_022412831.1	protein_coding	22	c.3000+932C>T
30	35759496	A	T	PASS	intron_variant	MODIFIER	PARP6	478358	transcript	XM_005638564.3	protein_coding	11	c.811-56T>A
30	35759496	A	T	PASS	intron_variant	MODIFIER	PARP6	478358	transcript	XM_005638569.3	protein_coding	10	c.751-56T>A
30	35759496	A	T	PASS	intron_variant	MODIFIER	PARP6	478358	transcript	XM_005638570.3	protein_coding	10	c.751-56T>A
30	35759496	A	T	PASS	intron_variant	MODIFIER	PARP6	478358	transcript	XM_848003.5	protein_coding	10	c.811-56T>A
30	35759496	A	T	PASS	intron_variant	MODIFIER	PARP6	478358	transcript	XR_001314906.2	pseudogene	10	n.1664-56T>A
30	35759496	A	T	PASS	intron_variant	MODIFIER	PARP6	478358	transcript	XM_022412796.1	protein_coding	11	c.811-56T>A
30	35759496	A	T	PASS	intron_variant	MODIFIER	PARP6	478358	transcript	XM_022412797.1	protein_coding	11	c.811-56T>A
30	35759496	A	T	PASS	intron_variant	MODIFIER	PARP6	478358	transcript	XM_005638568.3	protein_coding	11	c.811-56T>A
30	35759496	A	T	PASS	intron_variant	MODIFIER	PARP6	478358	transcript	XM_022412798.1	protein_coding	10	c.811-56T>A
30	35759496	A	T	PASS	intron_variant	MODIFIER	PARP6	478358	transcript	XM_022412799.1	protein_coding	10	c.811-56T>A
30	35955066	G	A	PASS	intron_variant	MODIFIER	ARIH1	478359	transcript	XM_535533.6	protein_coding	2	c.370-21915G>A
30	36687626	G	A	PASS	intergenic_region	MODIFIER	HCN4-REC114	448794-100686733	intergenic_region	448794-100686733		-1	n.36687626G>A
30	37181591	CCCCGTCCCGA	C	PASS	downstream_gene_variant	MODIFIER	LOC111093351	111093351	transcript	XR_002621406.1	pseudogene	-1	n.*1955_*1964delCCCGTCCCGA
30	37181591	CCCCGTCCCGA	C	PASS	downstream_gene_variant	MODIFIER	LOC111093351	111093351	transcript	XR_002621407.1	pseudogene	-1	n.*1955_*1964delCCCGTCCCGA
30	37181591	CCCCGTCCCGA	C	PASS	intergenic_region	MODIFIER	LOC111093351-LOXL1	111093351-100686150	intergenic_region	111093351-100686150		-1	n.37181592_37181601delCCCGTCCCGA
30	39818350	G	GTCTCCTTCCCCGGGGGAGGCAAGCAGAGGAGCGACCGCGCAGCACCCAGGGGCGCCGCCGGGCCTGCTGGAGCTGCCCAGCCGGGGCCACCAGCCCTGACCCCCTGGTGGCCACACTCCCACTCCCACGCA	PASS	intergenic_region	MODIFIER	SCAPER-LOC111093339	478373-111093339	intergenic_region	478373-111093339		-1	n.39818350_39818351insTCTCCTTCCCCGGGGGAGGCAAGCAGAGGAGCGACCGCGCAGCACCCAGGGGCGCCGCCGGGCCTGCTGGAGCTGCCCAGCCGGGGCCACCAGCCCTGACCCCCTGGTGGCCACACTCCCACTCCCACGCA
30	39873081	G	A	GATKstd	upstream_gene_variant	MODIFIER	LOC102153224	102153224	transcript	102153224	pseudogene	-1	n.-3125C>T
30	39873081	G	A	GATKstd	intron_variant	MODIFIER	ETFA	610134	transcript	XM_848294.5	protein_coding	6	c.562+104G>A
31	12820270	C	T	GATKstd	intron_variant	MODIFIER	LOC102154980	102154980	transcript	XR_002621553.1	pseudogene	1	n.145-28601C>T
31	12820271	A	G	GATKstd	intron_variant	MODIFIER	LOC102154980	102154980	transcript	XR_002621553.1	pseudogene	1	n.145-28600A>G
31	33842845	C	CGCGGGGGGGGGGGGGTTCCGG	PASS	upstream_gene_variant	MODIFIER	LOC111093448	111093448	transcript	XR_002621595.1	pseudogene	-1	n.-2038_-2037insCCGGAACCCCCCCCCCCCCGC
31	33842845	C	CGCGGGGGGGGGGGGGTTCCGG	PASS	upstream_gene_variant	MODIFIER	ETS2	487761	transcript	XM_022413104.1	protein_coding	-1	c.-3976_-3975insGCGGGGGGGGGGGGGTTCCGG
31	33842845	C	CGCGGGGGGGGGGGGGTTCCGG	PASS	intergenic_region	MODIFIER	LOC111093448-ETS2	111093448-487761	intergenic_region	111093448-487761		-1	n.33842845_33842846insGCGGGGGGGGGGGGGTTCCGG
31	38000690	C	CCCGCCCCGTCCCCGCCCCGCCCCCTCCCCCTCCCCGCCCGCCCCGCCGCGCCAGG	PASS	downstream_gene_variant	MODIFIER	TRAPPC10	487789	transcript	XM_544914.6	protein_coding	-1	c.*4179_*4180insCCGCCCCGTCCCCGCCCCGCCCCCTCCCCCTCCCCGCCCGCCCCGCCGCGCCAGG
31	38000690	C	CCCGCCCCGTCCCCGCCCCGCCCCCTCCCCCTCCCCGCCCGCCCCGCCGCGCCAGG	PASS	downstream_gene_variant	MODIFIER	TRAPPC10	487789	transcript	XM_022413376.1	protein_coding	-1	c.*4179_*4180insCCGCCCCGTCCCCGCCCCGCCCCCTCCCCCTCCCCGCCCGCCCCGCCGCGCCAGG
31	38000690	C	CCCGCCCCGTCCCCGCCCCGCCCCCTCCCCCTCCCCGCCCGCCCCGCCGCGCCAGG	PASS	downstream_gene_variant	MODIFIER	TRAPPC10	487789	transcript	XM_022413375.1	protein_coding	-1	c.*4179_*4180insCCGCCCCGTCCCCGCCCCGCCCCCTCCCCCTCCCCGCCCGCCCCGCCGCGCCAGG
31	38000690	C	CCCGCCCCGTCCCCGCCCCGCCCCCTCCCCCTCCCCGCCCGCCCCGCCGCGCCAGG	PASS	intron_variant	MODIFIER	PWP2	487790	transcript	XM_544915.7	protein_coding	3	c.128+47_128+48insCCGCCCCGTCCCCGCCCCGCCCCCTCCCCCTCCCCGCCCGCCCCGCCGCGCCAGG
31	38028237	G	GGCCCCTCCCGGGTTGGCCGCCGTCACCCCGTCCCACCCCCCGCCCCCGCCGGTGCCCCGGGCGGACCCCGTGACCGCTGCCGCCCGCAGGTGCTGTCGGGATGCGGGGTCT	PASS	upstream_gene_variant	MODIFIER	LOC111093532	111093532	transcript	XR_002621811.1	pseudogene	-1	n.-275_-274insAGACCCCGCATCCCGACAGCACCTGCGGGCGGCAGCGGTCACGGGGTCCGCCCGGGGCACCGGCGGGGGCGGGGGGTGGGACGGGGTGACGGCGGCCAACCCGGGAGGGGC
31	38028237	G	GGCCCCTCCCGGGTTGGCCGCCGTCACCCCGTCCCACCCCCCGCCCCCGCCGGTGCCCCGGGCGGACCCCGTGACCGCTGCCGCCCGCAGGTGCTGTCGGGATGCGGGGTCT	PASS	intron_variant	MODIFIER	C31H21orf33	611316	transcript	XM_022413275.1	protein_coding	1	c.118+33_118+34insGCCCCTCCCGGGTTGGCCGCCGTCACCCCGTCCCACCCCCCGCCCCCGCCGGTGCCCCGGGCGGACCCCGTGACCGCTGCCGCCCGCAGGTGCTGTCGGGATGCGGGGTCT
31	38499781	A	T	GATKstd	intron_variant	MODIFIER	PTTG1IP	100856547	transcript	XM_003640091.4	protein_coding	3	c.278-694T>A
31	38499781	A	T	GATKstd	intron_variant	MODIFIER	PTTG1IP	100856547	transcript	XM_014109793.1	protein_coding	3	c.182-694T>A
31	38499781	A	T	GATKstd	intron_variant	MODIFIER	PTTG1IP	100856547	transcript	XM_014109792.1	protein_coding	3	c.194-694T>A
32	6090163	G	A	PASS	upstream_gene_variant	MODIFIER	RASGEF1B	607404	transcript	XM_005639113.3	protein_coding	-1	c.-114C>T
32	6090163	G	A	PASS	upstream_gene_variant	MODIFIER	RASGEF1B	607404	transcript	XM_014109996.2	protein_coding	-1	c.-53773C>T
32	6090163	G	A	PASS	upstream_gene_variant	MODIFIER	RASGEF1B	607404	transcript	XM_005639115.3	protein_coding	-1	c.-114C>T
32	6090163	G	A	PASS	intergenic_region	MODIFIER	RASGEF1B-LOC102152686	607404-102152686	intergenic_region	607404-102152686		-1	n.6090163G>A
32	20139731	G	C	GATKstd	intron_variant	MODIFIER	STPG2	487867	transcript	XM_022413470.1	protein_coding	11	c.1430-19713C>G
32	20139731	G	C	GATKstd	intron_variant	MODIFIER	STPG2	487867	transcript	XM_014110065.2	protein_coding	11	c.1430-19713C>G
32	20139731	G	C	GATKstd	intron_variant	MODIFIER	STPG2	487867	transcript	XM_014110066.2	protein_coding	11	c.1430-19713C>G
32	20139731	G	C	GATKstd	intron_variant	MODIFIER	STPG2	487867	transcript	XM_022413471.1	protein_coding	11	c.1430-19713C>G
32	20139731	G	C	GATKstd	intron_variant	MODIFIER	STPG2	487867	transcript	XM_022413473.1	protein_coding	10	c.1292-19713C>G
32	20139731	G	C	GATKstd	intron_variant	MODIFIER	STPG2	487867	transcript	XR_002621954.1	pseudogene	11	n.1446-19713C>G
32	20139731	G	C	GATKstd	intron_variant	MODIFIER	STPG2	487867	transcript	XR_002621955.1	pseudogene	11	n.1446-19713C>G
32	20139731	G	C	GATKstd	intron_variant	MODIFIER	STPG2	487867	transcript	XR_002621951.1	pseudogene	11	n.1446-19713C>G
32	20139731	G	C	GATKstd	intron_variant	MODIFIER	STPG2	487867	transcript	XR_002621960.1	pseudogene	11	n.1446-19713C>G
32	20139731	G	C	GATKstd	intron_variant	MODIFIER	STPG2	487867	transcript	XR_001315084.2	pseudogene	11	n.1446-19713C>G
32	20139731	G	C	GATKstd	intron_variant	MODIFIER	STPG2	487867	transcript	XR_002621949.1	pseudogene	11	n.1446-19713C>G
32	20139731	G	C	GATKstd	intron_variant	MODIFIER	STPG2	487867	transcript	XM_022413475.1	protein_coding	11	c.1430-19713C>G
32	20139731	G	C	GATKstd	intron_variant	MODIFIER	STPG2	487867	transcript	XR_002621952.1	pseudogene	11	n.1446-19713C>G
32	20139731	G	C	GATKstd	intron_variant	MODIFIER	STPG2	487867	transcript	XM_022413476.1	protein_coding	11	c.1430-19713C>G
32	20139731	G	C	GATKstd	intron_variant	MODIFIER	STPG2	487867	transcript	XR_002621958.1	pseudogene	11	n.1446-19713C>G
32	20139731	G	C	GATKstd	intron_variant	MODIFIER	STPG2	487867	transcript	XM_022413477.1	protein_coding	11	c.1430-19713C>G
32	20139731	G	C	GATKstd	intron_variant	MODIFIER	STPG2	487867	transcript	XR_002621953.1	pseudogene	11	n.1446-19713C>G
32	20139731	G	C	GATKstd	intron_variant	MODIFIER	STPG2	487867	transcript	XR_002621957.1	pseudogene	11	n.1446-19713C>G
32	20139731	G	C	GATKstd	intron_variant	MODIFIER	STPG2	487867	transcript	XR_002621950.1	pseudogene	11	n.1446-19713C>G
32	20139731	G	C	GATKstd	intron_variant	MODIFIER	STPG2	487867	transcript	XR_002621956.1	pseudogene	11	n.1446-19713C>G
32	20139731	G	C	GATKstd	intron_variant	MODIFIER	STPG2	487867	transcript	XM_022413480.1	protein_coding	11	c.1430-19713C>G
32	20139731	G	C	GATKstd	intron_variant	MODIFIER	STPG2	487867	transcript	XM_022413474.1	protein_coding	11	c.1430-19713C>G
32	20139731	G	C	GATKstd	intron_variant	MODIFIER	STPG2	487867	transcript	XM_014110067.2	protein_coding	11	c.1430-19713C>G
32	20139731	G	C	GATKstd	intron_variant	MODIFIER	STPG2	487867	transcript	XM_022413478.1	protein_coding	11	c.1430-19713C>G
32	20139731	G	C	GATKstd	intron_variant	MODIFIER	STPG2	487867	transcript	XM_022413479.1	protein_coding	11	c.1430-6105C>G
32	20139731	G	C	GATKstd	intron_variant	MODIFIER	STPG2	487867	transcript	XM_022413482.1	protein_coding	11	c.1430-18020C>G
32	20139731	G	C	GATKstd	intron_variant	MODIFIER	STPG2	487867	transcript	XR_002621959.1	pseudogene	11	n.1446-6105C>G
33	1769254	G	C	GATKstd	intergenic_region	MODIFIER	ARL13B-NSUN3	487934-607320	intergenic_region	487934-607320		-1	n.1769254G>C
33	5429414	A	C	GATKstd	intergenic_region	MODIFIER	LOC111093765-LOC111093797	111093765-111093797	intergenic_region	111093765-111093797		-1	n.5429414A>C
33	9619991	G	C	GATKstd	intergenic_region	MODIFIER	LOC111093707-LOC111093750	111093707-111093750	intergenic_region	111093707-111093750		-1	n.9619991G>C
33	9620033	C	CT	PASS	intergenic_region	MODIFIER	LOC111093707-LOC111093750	111093707-111093750	intergenic_region	111093707-111093750		-1	n.9620033_9620034insT
33	12105155	G	A	GATKstd	intron_variant	MODIFIER	LOC102156904	102156904	transcript	XR_002622280.1	pseudogene	2	n.270-19726C>T
33	12105155	G	A	GATKstd	intron_variant	MODIFIER	LOC102156904	102156904	transcript	XR_002622279.1	pseudogene	2	n.239-19726C>T
33	12105155	G	A	GATKstd	intron_variant	MODIFIER	LOC102156904	102156904	transcript	XR_296392.2	pseudogene	2	n.229-19726C>T
33	17042433	C	T	PASS	downstream_gene_variant	MODIFIER	ATG3	478564	transcript	XM_535740.7	protein_coding	-1	c.*4707G>A
33	17042433	C	T	PASS	intergenic_region	MODIFIER	BTLA-ATG3	487975-478564	intergenic_region	487975-478564		-1	n.17042433C>T
33	24680520	A	ATTTTTTTTTTTTTTTTTTTTTTTTTTT	PASS	intron_variant	MODIFIER	STXBP5L	100684760	transcript	XM_022414054.1	protein_coding	23	c.2752+1675_2752+1676insTTTTTTTTTTTTTTTTTTTTTTTTTTT
33	24680520	A	ATTTTTTTTTTTTTTTTTTTTTTTTTTT	PASS	intron_variant	MODIFIER	STXBP5L	100684760	transcript	XM_022414055.1	protein_coding	23	c.2686+1675_2686+1676insTTTTTTTTTTTTTTTTTTTTTTTTTTT
33	24680520	A	ATTTTTTTTTTTTTTTTTTTTTTTTTTT	PASS	intron_variant	MODIFIER	STXBP5L	100684760	transcript	XM_022414056.1	protein_coding	22	c.2680+1675_2680+1676insTTTTTTTTTTTTTTTTTTTTTTTTTTT
33	24680520	A	ATTTTTTTTTTTTTTTTTTTTTTTTTTT	PASS	intron_variant	MODIFIER	STXBP5L	100684760	transcript	XM_022414057.1	protein_coding	22	c.2659+1675_2659+1676insTTTTTTTTTTTTTTTTTTTTTTTTTTT
33	24680520	A	ATTTTTTTTTTTTTTTTTTTTTTTTTTT	PASS	intron_variant	MODIFIER	STXBP5L	100684760	transcript	XM_022414058.1	protein_coding	22	c.2593+1675_2593+1676insTTTTTTTTTTTTTTTTTTTTTTTTTTT
33	24680520	A	ATTTTTTTTTTTTTTTTTTTTTTTTTTT	PASS	intron_variant	MODIFIER	STXBP5L	100684760	transcript	XM_022414059.1	protein_coding	21	c.2587+1675_2587+1676insTTTTTTTTTTTTTTTTTTTTTTTTTTT
33	24680521	G	T	PASS	intron_variant	MODIFIER	STXBP5L	100684760	transcript	XM_022414054.1	protein_coding	23	c.2752+1676G>T
33	24680521	G	T	PASS	intron_variant	MODIFIER	STXBP5L	100684760	transcript	XM_022414055.1	protein_coding	23	c.2686+1676G>T
33	24680521	G	T	PASS	intron_variant	MODIFIER	STXBP5L	100684760	transcript	XM_022414056.1	protein_coding	22	c.2680+1676G>T
33	24680521	G	T	PASS	intron_variant	MODIFIER	STXBP5L	100684760	transcript	XM_022414057.1	protein_coding	22	c.2659+1676G>T
33	24680521	G	T	PASS	intron_variant	MODIFIER	STXBP5L	100684760	transcript	XM_022414058.1	protein_coding	22	c.2593+1676G>T
33	24680521	G	T	PASS	intron_variant	MODIFIER	STXBP5L	100684760	transcript	XM_022414059.1	protein_coding	21	c.2587+1676G>T
34	29529639	T	TAGAAAGTCACCTTCAAAAAAAAAATAAAAAAAAAAAAAAAAAAAAAAAAAAAAAAAAAAAAAAAAAAAAAA	PASS	intergenic_region	MODIFIER	LOC100685395-LOC102153508	100685395-102153508	intergenic_region	100685395-102153508		-1	n.29529639_29529640insAGAAAGTCACCTTCAAAAAAAAAATAAAAAAAAAAAAAAAAAAAAAAAAAAAAAAAAAAAAAAAAAAAAAA
34	33240154	A	G	GATKstd	intron_variant	MODIFIER	LOC102151755	102151755	transcript	XM_022414096.1	protein_coding	4	c.-1108+22026A>G
34	33240154	A	G	GATKstd	intron_variant	MODIFIER	LOC102151755	102151755	transcript	XM_022414100.1	protein_coding	4	c.-1112+22026A>G
34	33240154	A	G	GATKstd	intron_variant	MODIFIER	LOC102151755	102151755	transcript	XM_022414098.1	protein_coding	4	c.-943+22026A>G
34	33240154	A	G	GATKstd	intron_variant	MODIFIER	LOC102151755	102151755	transcript	XM_022414099.1	protein_coding	4	c.-982+22026A>G
34	33240154	A	G	GATKstd	intron_variant	MODIFIER	LOC102151755	102151755	transcript	XM_022414101.1	protein_coding	3	c.-1107-42926A>G
34	33240154	A	G	GATKstd	intron_variant	MODIFIER	LOC102151755	102151755	transcript	XM_022414102.1	protein_coding	4	c.-994+22026A>G
34	33240154	A	G	GATKstd	intron_variant	MODIFIER	LOC102151755	102151755	transcript	XM_022414103.1	protein_coding	4	c.-1252+22026A>G
34	33240154	A	G	GATKstd	intron_variant	MODIFIER	LOC102151755	102151755	transcript	XM_022414104.1	protein_coding	4	c.-1108+22026A>G
34	33240154	A	G	GATKstd	intron_variant	MODIFIER	LOC102151755	102151755	transcript	XM_022414105.1	protein_coding	4	c.-1108+22026A>G
34	33240154	A	G	GATKstd	intron_variant	MODIFIER	LOC102151755	102151755	transcript	XM_022414106.1	protein_coding	4	c.-1108+22026A>G
34	33240154	A	G	GATKstd	intron_variant	MODIFIER	LOC102151755	102151755	transcript	XM_022414097.1	protein_coding	4	c.-1108+22026A>G
34	33335100	A	C	GATKstd	intron_variant	MODIFIER	LOC102151755	102151755	transcript	XM_022414096.1	protein_coding	6	c.-993-27023A>C
34	33335100	A	C	GATKstd	intron_variant	MODIFIER	LOC102151755	102151755	transcript	XM_022414100.1	protein_coding	6	c.-997-27023A>C
34	33335100	A	C	GATKstd	intron_variant	MODIFIER	LOC102151755	102151755	transcript	XM_022414098.1	protein_coding	6	c.-828-27023A>C
34	33335100	A	C	GATKstd	intron_variant	MODIFIER	LOC102151755	102151755	transcript	XM_022414099.1	protein_coding	6	c.-867-27023A>C
34	33335100	A	C	GATKstd	intron_variant	MODIFIER	LOC102151755	102151755	transcript	XM_022414101.1	protein_coding	5	c.-993-27023A>C
34	33335100	A	C	GATKstd	intron_variant	MODIFIER	LOC102151755	102151755	transcript	XM_022414102.1	protein_coding	4	c.-993-27023A>C
34	33335100	A	C	GATKstd	intron_variant	MODIFIER	LOC102151755	102151755	transcript	XM_022414103.1	protein_coding	6	c.-1137-27023A>C
34	33335100	A	C	GATKstd	intron_variant	MODIFIER	LOC102151755	102151755	transcript	XM_022414104.1	protein_coding	6	c.-993-27023A>C
34	33335100	A	C	GATKstd	intron_variant	MODIFIER	LOC102151755	102151755	transcript	XM_022414105.1	protein_coding	6	c.-993-27023A>C
34	33335100	A	C	GATKstd	intron_variant	MODIFIER	LOC102151755	102151755	transcript	XM_022414106.1	protein_coding	6	c.-993-27023A>C
34	33335100	A	C	GATKstd	intron_variant	MODIFIER	LOC102151755	102151755	transcript	XM_022414097.1	protein_coding	6	c.-993-27023A>C
34	33349838	C	T	GATKstd	upstream_gene_variant	MODIFIER	LOC106558196	106558196	transcript	106558196	pseudogene	-1	n.-3775G>A
34	33349838	C	T	GATKstd	intron_variant	MODIFIER	LOC102151755	102151755	transcript	XM_022414096.1	protein_coding	6	c.-993-12285C>T
34	33349838	C	T	GATKstd	intron_variant	MODIFIER	LOC102151755	102151755	transcript	XM_022414100.1	protein_coding	6	c.-997-12285C>T
34	33349838	C	T	GATKstd	intron_variant	MODIFIER	LOC102151755	102151755	transcript	XM_022414098.1	protein_coding	6	c.-828-12285C>T
34	33349838	C	T	GATKstd	intron_variant	MODIFIER	LOC102151755	102151755	transcript	XM_022414099.1	protein_coding	6	c.-867-12285C>T
34	33349838	C	T	GATKstd	intron_variant	MODIFIER	LOC102151755	102151755	transcript	XM_022414101.1	protein_coding	5	c.-993-12285C>T
34	33349838	C	T	GATKstd	intron_variant	MODIFIER	LOC102151755	102151755	transcript	XM_022414102.1	protein_coding	4	c.-993-12285C>T
34	33349838	C	T	GATKstd	intron_variant	MODIFIER	LOC102151755	102151755	transcript	XM_022414103.1	protein_coding	6	c.-1137-12285C>T
34	33349838	C	T	GATKstd	intron_variant	MODIFIER	LOC102151755	102151755	transcript	XM_022414104.1	protein_coding	6	c.-993-12285C>T
34	33349838	C	T	GATKstd	intron_variant	MODIFIER	LOC102151755	102151755	transcript	XM_022414105.1	protein_coding	6	c.-993-12285C>T
34	33349838	C	T	GATKstd	intron_variant	MODIFIER	LOC102151755	102151755	transcript	XM_022414106.1	protein_coding	6	c.-993-12285C>T
34	33349838	C	T	GATKstd	intron_variant	MODIFIER	LOC102151755	102151755	transcript	XM_022414097.1	protein_coding	6	c.-993-12285C>T
34	33374109	C	T	GATKstd	upstream_gene_variant	MODIFIER	LOC102151755	102151755	transcript	XM_022414107.1	protein_coding	-1	c.-122787C>T
34	33374109	C	T	GATKstd	intron_variant	MODIFIER	LOC102151755	102151755	transcript	XM_022414096.1	protein_coding	8	c.-814-1520C>T
34	33374109	C	T	GATKstd	intron_variant	MODIFIER	LOC102151755	102151755	transcript	XM_022414100.1	protein_coding	8	c.-818-1520C>T
34	33374109	C	T	GATKstd	intron_variant	MODIFIER	LOC102151755	102151755	transcript	XM_022414098.1	protein_coding	8	c.-650+3012C>T
34	33374109	C	T	GATKstd	intron_variant	MODIFIER	LOC102151755	102151755	transcript	XM_022414099.1	protein_coding	8	c.-688-1520C>T
34	33374109	C	T	GATKstd	intron_variant	MODIFIER	LOC102151755	102151755	transcript	XM_022414101.1	protein_coding	7	c.-814-1520C>T
34	33374109	C	T	GATKstd	intron_variant	MODIFIER	LOC102151755	102151755	transcript	XM_022414102.1	protein_coding	6	c.-814-1520C>T
34	33374109	C	T	GATKstd	intron_variant	MODIFIER	LOC102151755	102151755	transcript	XM_022414103.1	protein_coding	8	c.-958-1520C>T
34	33374109	C	T	GATKstd	intron_variant	MODIFIER	LOC102151755	102151755	transcript	XM_022414104.1	protein_coding	8	c.-814-1520C>T
34	33374109	C	T	GATKstd	intron_variant	MODIFIER	LOC102151755	102151755	transcript	XM_022414105.1	protein_coding	8	c.-814-1520C>T
34	33374109	C	T	GATKstd	intron_variant	MODIFIER	LOC102151755	102151755	transcript	XM_022414106.1	protein_coding	8	c.-814-1520C>T
34	33374109	C	T	GATKstd	intron_variant	MODIFIER	LOC102151755	102151755	transcript	XM_022414097.1	protein_coding	8	c.-814-1520C>T
34	33517883	G	A	GATKstd	intron_variant	MODIFIER	LOC102151755	102151755	transcript	XM_022414096.1	protein_coding	19	c.826-2449G>A
34	33517883	G	A	GATKstd	intron_variant	MODIFIER	LOC102151755	102151755	transcript	XM_022414100.1	protein_coding	19	c.826-2449G>A
34	33517883	G	A	GATKstd	intron_variant	MODIFIER	LOC102151755	102151755	transcript	XM_022414098.1	protein_coding	18	c.826-2449G>A
34	33517883	G	A	GATKstd	intron_variant	MODIFIER	LOC102151755	102151755	transcript	XM_022414099.1	protein_coding	18	c.826-2449G>A
34	33517883	G	A	GATKstd	intron_variant	MODIFIER	LOC102151755	102151755	transcript	XM_022414101.1	protein_coding	18	c.826-2449G>A
34	33517883	G	A	GATKstd	intron_variant	MODIFIER	LOC102151755	102151755	transcript	XM_022414102.1	protein_coding	17	c.826-2449G>A
34	33517883	G	A	GATKstd	intron_variant	MODIFIER	LOC102151755	102151755	transcript	XM_022414103.1	protein_coding	20	c.826-2449G>A
34	33517883	G	A	GATKstd	intron_variant	MODIFIER	LOC102151755	102151755	transcript	XM_022414104.1	protein_coding	19	c.826-2449G>A
34	33517883	G	A	GATKstd	intron_variant	MODIFIER	LOC102151755	102151755	transcript	XM_022414105.1	protein_coding	19	c.826-2449G>A
34	33517883	G	A	GATKstd	intron_variant	MODIFIER	LOC102151755	102151755	transcript	XM_022414106.1	protein_coding	19	c.826-2449G>A
34	33517883	G	A	GATKstd	intron_variant	MODIFIER	LOC102151755	102151755	transcript	XM_022414097.1	protein_coding	19	c.826-2449G>A
34	33517883	G	A	GATKstd	intron_variant	MODIFIER	LOC102151755	102151755	transcript	XM_022414107.1	protein_coding	12	c.826-2449G>A
34	33517883	G	A	GATKstd	intron_variant	MODIFIER	LOC102151755	102151755	transcript	XM_022414108.1	protein_coding	9	c.826-2449G>A
34	33517883	G	A	GATKstd	intron_variant	MODIFIER	LOC102151755	102151755	transcript	XM_022414110.1	protein_coding	6	c.607-2449G>A
34	33517883	G	A	GATKstd	intron_variant	MODIFIER	LOC102151755	102151755	transcript	XM_022414109.1	protein_coding	5	c.607-2449G>A
34	33518297	G	A	GATKstd	intron_variant	MODIFIER	LOC102151755	102151755	transcript	XM_022414096.1	protein_coding	19	c.826-2035G>A
34	33518297	G	A	GATKstd	intron_variant	MODIFIER	LOC102151755	102151755	transcript	XM_022414100.1	protein_coding	19	c.826-2035G>A
34	33518297	G	A	GATKstd	intron_variant	MODIFIER	LOC102151755	102151755	transcript	XM_022414098.1	protein_coding	18	c.826-2035G>A
34	33518297	G	A	GATKstd	intron_variant	MODIFIER	LOC102151755	102151755	transcript	XM_022414099.1	protein_coding	18	c.826-2035G>A
34	33518297	G	A	GATKstd	intron_variant	MODIFIER	LOC102151755	102151755	transcript	XM_022414101.1	protein_coding	18	c.826-2035G>A
34	33518297	G	A	GATKstd	intron_variant	MODIFIER	LOC102151755	102151755	transcript	XM_022414102.1	protein_coding	17	c.826-2035G>A
34	33518297	G	A	GATKstd	intron_variant	MODIFIER	LOC102151755	102151755	transcript	XM_022414103.1	protein_coding	20	c.826-2035G>A
34	33518297	G	A	GATKstd	intron_variant	MODIFIER	LOC102151755	102151755	transcript	XM_022414104.1	protein_coding	19	c.826-2035G>A
34	33518297	G	A	GATKstd	intron_variant	MODIFIER	LOC102151755	102151755	transcript	XM_022414105.1	protein_coding	19	c.826-2035G>A
34	33518297	G	A	GATKstd	intron_variant	MODIFIER	LOC102151755	102151755	transcript	XM_022414106.1	protein_coding	19	c.826-2035G>A
34	33518297	G	A	GATKstd	intron_variant	MODIFIER	LOC102151755	102151755	transcript	XM_022414097.1	protein_coding	19	c.826-2035G>A
34	33518297	G	A	GATKstd	intron_variant	MODIFIER	LOC102151755	102151755	transcript	XM_022414107.1	protein_coding	12	c.826-2035G>A
34	33518297	G	A	GATKstd	intron_variant	MODIFIER	LOC102151755	102151755	transcript	XM_022414108.1	protein_coding	9	c.826-2035G>A
34	33518297	G	A	GATKstd	intron_variant	MODIFIER	LOC102151755	102151755	transcript	XM_022414110.1	protein_coding	6	c.607-2035G>A
34	33518297	G	A	GATKstd	intron_variant	MODIFIER	LOC102151755	102151755	transcript	XM_022414109.1	protein_coding	5	c.607-2035G>A
34	33603960	T	TA	PASS	intergenic_region	MODIFIER	LOC102151755-LOC102151967	102151755-102151967	intergenic_region	102151755-102151967		-1	n.33603960_33603961insA
34	33808278	T	C	GATKstd	intron_variant	MODIFIER	MECOM	488148	transcript	XM_005639899.3	protein_coding	2	c.376-668A>G
34	33808278	T	C	GATKstd	intron_variant	MODIFIER	MECOM	488148	transcript	XM_022414199.1	protein_coding	1	c.-190+542A>G
34	33808278	T	C	GATKstd	intron_variant	MODIFIER	MECOM	488148	transcript	XM_005639904.3	protein_coding	1	c.-189-668A>G
34	33808278	T	C	GATKstd	intron_variant	MODIFIER	MECOM	488148	transcript	XM_005639907.2	protein_coding	1	c.-189-668A>G
34	33808278	T	C	GATKstd	intron_variant	MODIFIER	MECOM	488148	transcript	XM_022414197.1	protein_coding	1	c.-189-668A>G
34	33808278	T	C	GATKstd	intron_variant	MODIFIER	MECOM	488148	transcript	XM_022414198.1	protein_coding	1	c.4-668A>G
34	33808278	T	C	GATKstd	intron_variant	MODIFIER	MECOM	488148	transcript	XM_022414200.1	protein_coding	2	c.376-668A>G
34	33808278	T	C	GATKstd	intron_variant	MODIFIER	MECOM	488148	transcript	XM_022414201.1	protein_coding	2	c.376-668A>G
34	33808278	T	C	GATKstd	intron_variant	MODIFIER	MECOM	488148	transcript	XM_005639900.3	protein_coding	2	c.376-668A>G
34	33808278	T	C	GATKstd	intron_variant	MODIFIER	MECOM	488148	transcript	XM_005639901.3	protein_coding	2	c.376-668A>G
34	33808278	T	C	GATKstd	intron_variant	MODIFIER	MECOM	488148	transcript	XM_005639902.3	protein_coding	2	c.376-668A>G
34	33808278	T	C	GATKstd	intron_variant	MODIFIER	MECOM	488148	transcript	XM_022414196.1	protein_coding	2	c.376-668A>G
34	33808278	T	C	GATKstd	intron_variant	MODIFIER	MECOM	488148	transcript	XM_014110387.2	protein_coding	2	c.376-668A>G
34	33948764	A	T	GATKstd	intron_variant	MODIFIER	MECOM	488148	transcript	XM_005639899.3	protein_coding	2	c.375+81294T>A
34	33948764	A	T	GATKstd	intron_variant	MODIFIER	MECOM	488148	transcript	XM_022414198.1	protein_coding	1	c.3+21278T>A
34	33948764	A	T	GATKstd	intron_variant	MODIFIER	MECOM	488148	transcript	XM_022414200.1	protein_coding	2	c.375+81294T>A
34	33948764	A	T	GATKstd	intron_variant	MODIFIER	MECOM	488148	transcript	XM_022414201.1	protein_coding	2	c.375+81294T>A
34	33948764	A	T	GATKstd	intron_variant	MODIFIER	MECOM	488148	transcript	XM_005639900.3	protein_coding	2	c.375+81294T>A
34	33948764	A	T	GATKstd	intron_variant	MODIFIER	MECOM	488148	transcript	XM_005639901.3	protein_coding	2	c.375+81294T>A
34	33948764	A	T	GATKstd	intron_variant	MODIFIER	MECOM	488148	transcript	XM_005639902.3	protein_coding	2	c.375+81294T>A
34	33948764	A	T	GATKstd	intron_variant	MODIFIER	MECOM	488148	transcript	XM_022414196.1	protein_coding	2	c.375+81294T>A
34	33948764	A	T	GATKstd	intron_variant	MODIFIER	MECOM	488148	transcript	XM_014110387.2	protein_coding	2	c.375+81294T>A
34	33972833	G	GA	PASS	upstream_gene_variant	MODIFIER	MECOM	488148	transcript	XM_022414198.1	protein_coding	-1	c.-2790_-2789insT
34	33972833	G	GA	PASS	intron_variant	MODIFIER	MECOM	488148	transcript	XM_005639899.3	protein_coding	2	c.375+57224_375+57225insT
34	33972833	G	GA	PASS	intron_variant	MODIFIER	MECOM	488148	transcript	XM_022414200.1	protein_coding	2	c.375+57224_375+57225insT
34	33972833	G	GA	PASS	intron_variant	MODIFIER	MECOM	488148	transcript	XM_022414201.1	protein_coding	2	c.375+57224_375+57225insT
34	33972833	G	GA	PASS	intron_variant	MODIFIER	MECOM	488148	transcript	XM_005639900.3	protein_coding	2	c.375+57224_375+57225insT
34	33972833	G	GA	PASS	intron_variant	MODIFIER	MECOM	488148	transcript	XM_005639901.3	protein_coding	2	c.375+57224_375+57225insT
34	33972833	G	GA	PASS	intron_variant	MODIFIER	MECOM	488148	transcript	XM_005639902.3	protein_coding	2	c.375+57224_375+57225insT
34	33972833	G	GA	PASS	intron_variant	MODIFIER	MECOM	488148	transcript	XM_022414196.1	protein_coding	2	c.375+57224_375+57225insT
34	33972833	G	GA	PASS	intron_variant	MODIFIER	MECOM	488148	transcript	XM_014110387.2	protein_coding	2	c.375+57224_375+57225insT
34	33993847	G	A	GATKstd	intron_variant	MODIFIER	MECOM	488148	transcript	XM_005639899.3	protein_coding	2	c.375+36211C>T
34	33993847	G	A	GATKstd	intron_variant	MODIFIER	MECOM	488148	transcript	XM_022414200.1	protein_coding	2	c.375+36211C>T
34	33993847	G	A	GATKstd	intron_variant	MODIFIER	MECOM	488148	transcript	XM_022414201.1	protein_coding	2	c.375+36211C>T
34	33993847	G	A	GATKstd	intron_variant	MODIFIER	MECOM	488148	transcript	XM_005639900.3	protein_coding	2	c.375+36211C>T
34	33993847	G	A	GATKstd	intron_variant	MODIFIER	MECOM	488148	transcript	XM_005639901.3	protein_coding	2	c.375+36211C>T
34	33993847	G	A	GATKstd	intron_variant	MODIFIER	MECOM	488148	transcript	XM_005639902.3	protein_coding	2	c.375+36211C>T
34	33993847	G	A	GATKstd	intron_variant	MODIFIER	MECOM	488148	transcript	XM_022414196.1	protein_coding	2	c.375+36211C>T
34	33993847	G	A	GATKstd	intron_variant	MODIFIER	MECOM	488148	transcript	XM_014110387.2	protein_coding	2	c.375+36211C>T
34	34373417	A	T	GATKstd	upstream_gene_variant	MODIFIER	TRNAV-AAC	111093967	transcript	111093967	pseudogene	-1	n.-3121A>T
34	34373417	A	T	GATKstd	intron_variant	MODIFIER	ACTRT3	488149	transcript	XM_545273.6	protein_coding	1	c.201-54T>A
34	35753227	C	A	GATKstd	downstream_gene_variant	MODIFIER	LOC111093943	111093943	transcript	XR_002622749.1	pseudogene	-1	n.*1363C>A
34	35753227	C	A	GATKstd	intergenic_region	MODIFIER	LOC111093943-PLD1	111093943-488167	intergenic_region	111093943-488167		-1	n.35753227C>A
34	36374968	G	C	GATKstd	intron_variant	MODIFIER	FNDC3B	488169	transcript	XM_545293.5	protein_coding	1	c.111+837G>C
34	36384604	C	T	GATKstd	intron_variant	MODIFIER	FNDC3B	488169	transcript	XM_545293.5	protein_coding	1	c.111+10473C>T
34	36699797	T	G	PASS	intergenic_region	MODIFIER	GHSR-TNFSF10	100101479-100174780	intergenic_region	100101479-100174780		-1	n.36699797T>G
34	36946543	T	C	GATKstd	downstream_gene_variant	MODIFIER	LOC102151451	102151451	transcript	102151451	pseudogene	-1	n.*1444A>G
34	36946543	T	C	GATKstd	intron_variant	MODIFIER	ECT2	488172	transcript	XM_014110471.2	protein_coding	21	c.2433+2369T>C
34	36946543	T	C	GATKstd	intron_variant	MODIFIER	ECT2	488172	transcript	XM_014110472.2	protein_coding	22	c.2400+2369T>C
34	36946543	T	C	GATKstd	intron_variant	MODIFIER	ECT2	488172	transcript	XM_014110474.2	protein_coding	21	c.2313+2369T>C
34	36946543	T	C	GATKstd	intron_variant	MODIFIER	ECT2	488172	transcript	XM_014110475.2	protein_coding	20	c.2307+2369T>C
34	36946543	T	C	GATKstd	intron_variant	MODIFIER	ECT2	488172	transcript	XM_014110476.2	protein_coding	21	c.2400+2369T>C
34	36946543	T	C	GATKstd	intron_variant	MODIFIER	ECT2	488172	transcript	XM_014110477.2	protein_coding	20	c.2307+2369T>C
34	36946543	T	C	GATKstd	intron_variant	MODIFIER	ECT2	488172	transcript	XM_022414168.1	protein_coding	20	c.2220+2369T>C
34	36997042	C	T	GATKstd	downstream_gene_variant	MODIFIER	SPATA16	478689	transcript	XM_022414159.1	protein_coding	-1	c.*2987G>A
34	36997042	C	T	GATKstd	downstream_gene_variant	MODIFIER	SPATA16	478689	transcript	XM_022414156.1	protein_coding	-1	c.*2950G>A
34	36997042	C	T	GATKstd	downstream_gene_variant	MODIFIER	SPATA16	478689	transcript	XM_022414157.1	protein_coding	-1	c.*2950G>A
34	36997042	C	T	GATKstd	downstream_gene_variant	MODIFIER	SPATA16	478689	transcript	XM_022414158.1	protein_coding	-1	c.*2987G>A
34	36997042	C	T	GATKstd	downstream_gene_variant	MODIFIER	SPATA16	478689	transcript	XM_005639927.2	protein_coding	-1	c.*3720G>A
34	36997042	C	T	GATKstd	intron_variant	MODIFIER	SPATA16	478689	transcript	XM_022414153.1	protein_coding	11	c.1680-1372G>A
34	36997042	C	T	GATKstd	intron_variant	MODIFIER	SPATA16	478689	transcript	XM_005639926.2	protein_coding	10	c.1639-1372G>A
34	36997042	C	T	GATKstd	intron_variant	MODIFIER	SPATA16	478689	transcript	XM_005639924.2	protein_coding	11	c.1677-1372G>A
34	36997042	C	T	GATKstd	intron_variant	MODIFIER	SPATA16	478689	transcript	XM_022414155.1	protein_coding	11	c.1638-1372G>A
34	36998547	C	T	GATKstd	downstream_gene_variant	MODIFIER	SPATA16	478689	transcript	XM_022414159.1	protein_coding	-1	c.*1482G>A
34	36998547	C	T	GATKstd	downstream_gene_variant	MODIFIER	SPATA16	478689	transcript	XM_022414156.1	protein_coding	-1	c.*1445G>A
34	36998547	C	T	GATKstd	downstream_gene_variant	MODIFIER	SPATA16	478689	transcript	XM_022414157.1	protein_coding	-1	c.*1445G>A
34	36998547	C	T	GATKstd	downstream_gene_variant	MODIFIER	SPATA16	478689	transcript	XM_022414158.1	protein_coding	-1	c.*1482G>A
34	36998547	C	T	GATKstd	downstream_gene_variant	MODIFIER	SPATA16	478689	transcript	XM_005639927.2	protein_coding	-1	c.*2215G>A
34	36998547	C	T	GATKstd	intron_variant	MODIFIER	SPATA16	478689	transcript	XM_022414153.1	protein_coding	11	c.1679+2219G>A
34	36998547	C	T	GATKstd	intron_variant	MODIFIER	SPATA16	478689	transcript	XM_005639926.2	protein_coding	10	c.1639-2877G>A
34	36998547	C	T	GATKstd	intron_variant	MODIFIER	SPATA16	478689	transcript	XM_005639924.2	protein_coding	11	c.1676+2219G>A
34	36998547	C	T	GATKstd	intron_variant	MODIFIER	SPATA16	478689	transcript	XM_022414155.1	protein_coding	11	c.1637+2219G>A
34	37637365	A	T	GATKstd	intron_variant	MODIFIER	NLGN1	488173	transcript	XM_005639929.3	protein_coding	2	c.493+64244A>T
34	37637365	A	T	GATKstd	intron_variant	MODIFIER	NLGN1	488173	transcript	XM_022414286.1	protein_coding	2	c.493+64244A>T
34	37637365	A	T	GATKstd	intron_variant	MODIFIER	NLGN1	488173	transcript	XM_005639930.3	protein_coding	2	c.493+64244A>T
34	37637365	A	T	GATKstd	intron_variant	MODIFIER	NLGN1	488173	transcript	XM_014110386.2	protein_coding	3	c.553+63740A>T
34	37637365	A	T	GATKstd	intron_variant	MODIFIER	NLGN1	488173	transcript	XM_005639932.3	protein_coding	2	c.493+64244A>T
34	37637365	A	T	GATKstd	intron_variant	MODIFIER	NLGN1	488173	transcript	XM_005639931.3	protein_coding	2	c.493+64244A>T
34	38146898	TTC	T	PASS	intron_variant	MODIFIER	NLGN1	488173	transcript	XM_005639929.3	protein_coding	4	c.707-50041_707-50040delTC
34	38146898	TTC	T	PASS	intron_variant	MODIFIER	NLGN1	488173	transcript	XM_022414286.1	protein_coding	4	c.707-50041_707-50040delTC
34	38146898	TTC	T	PASS	intron_variant	MODIFIER	NLGN1	488173	transcript	XM_005639930.3	protein_coding	4	c.707-50041_707-50040delTC
34	38146898	TTC	T	PASS	intron_variant	MODIFIER	NLGN1	488173	transcript	XM_014110386.2	protein_coding	4	c.707-50041_707-50040delTC
34	38146898	TTC	T	PASS	intron_variant	MODIFIER	NLGN1	488173	transcript	XM_005639932.3	protein_coding	3	c.647-50041_647-50040delTC
34	38146898	TTC	T	PASS	intron_variant	MODIFIER	NLGN1	488173	transcript	XM_005639931.3	protein_coding	3	c.647-50041_647-50040delTC
34	38736868	G	A	PASS	intron_variant	MODIFIER	NAALADL2	488174	transcript	XM_022414275.1	protein_coding	3	c.-9+80444G>A
34	38736868	G	A	PASS	intron_variant	MODIFIER	NAALADL2	488174	transcript	XM_005639936.2	protein_coding	3	c.-9+80444G>A
34	38736868	G	A	PASS	intron_variant	MODIFIER	NAALADL2	488174	transcript	XM_022414277.1	protein_coding	2	c.-8-243175G>A
34	38942233	A	ACATATGGCATGATTTTTTTTTTTTTTTTTTTTTTTTATTTTTTTTCTTTTTTTTTTATTTATTTTTTTTTTTTT	PASS	intron_variant	MODIFIER	NAALADL2	488174	transcript	XM_005639933.3	protein_coding	1	c.44-37810_44-37809insCATATGGCATGATTTTTTTTTTTTTTTTTTTTTTTTATTTTTTTTCTTTTTTTTTTATTTATTTTTTTTTTTTT
34	38942233	A	ACATATGGCATGATTTTTTTTTTTTTTTTTTTTTTTTATTTTTTTTCTTTTTTTTTTATTTATTTTTTTTTTTTT	PASS	intron_variant	MODIFIER	NAALADL2	488174	transcript	XM_022414275.1	protein_coding	3	c.-8-37810_-8-37809insCATATGGCATGATTTTTTTTTTTTTTTTTTTTTTTTATTTTTTTTCTTTTTTTTTTATTTATTTTTTTTTTTTT
34	38942233	A	ACATATGGCATGATTTTTTTTTTTTTTTTTTTTTTTTATTTTTTTTCTTTTTTTTTTATTTATTTTTTTTTTTTT	PASS	intron_variant	MODIFIER	NAALADL2	488174	transcript	XM_005639936.2	protein_coding	3	c.-8-37810_-8-37809insCATATGGCATGATTTTTTTTTTTTTTTTTTTTTTTTATTTTTTTTCTTTTTTTTTTATTTATTTTTTTTTTTTT
34	38942233	A	ACATATGGCATGATTTTTTTTTTTTTTTTTTTTTTTTATTTTTTTTCTTTTTTTTTTATTTATTTTTTTTTTTTT	PASS	intron_variant	MODIFIER	NAALADL2	488174	transcript	XM_022414277.1	protein_coding	2	c.-8-37810_-8-37809insCATATGGCATGATTTTTTTTTTTTTTTTTTTTTTTTATTTTTTTTCTTTTTTTTTTATTTATTTTTTTTTTTTT
34	38942233	A	ACATATGGCATGATTTTTTTTTTTTTTTTTTTTTTTTATTTTTTTTCTTTTTTTTTTATTTATTTTTTTTTTTTT	PASS	intron_variant	MODIFIER	NAALADL2	488174	transcript	XM_005639935.3	protein_coding	1	c.23-37810_23-37809insCATATGGCATGATTTTTTTTTTTTTTTTTTTTTTTTATTTTTTTTCTTTTTTTTTTATTTATTTTTTTTTTTTT
34	38942233	A	ACATATGGCATGATTTTTTTTTTTTTTTTTTTTTTTTATTTTTTTTCTTTTTTTTTTATTTATTTTTTTTTTTTT	PASS	intron_variant	MODIFIER	NAALADL2	488174	transcript	XM_005639938.3	protein_coding	1	c.-8-37810_-8-37809insCATATGGCATGATTTTTTTTTTTTTTTTTTTTTTTTATTTTTTTTCTTTTTTTTTTATTTATTTTTTTTTTTTT
34	38991465	T	G	PASS	intron_variant	MODIFIER	NAALADL2	488174	transcript	XM_005639933.3	protein_coding	2	c.545+10921T>G
34	38991465	T	G	PASS	intron_variant	MODIFIER	NAALADL2	488174	transcript	XM_022414275.1	protein_coding	4	c.494+10921T>G
34	38991465	T	G	PASS	intron_variant	MODIFIER	NAALADL2	488174	transcript	XM_005639936.2	protein_coding	4	c.494+10921T>G
34	38991465	T	G	PASS	intron_variant	MODIFIER	NAALADL2	488174	transcript	XM_022414277.1	protein_coding	3	c.494+10921T>G
34	38991465	T	G	PASS	intron_variant	MODIFIER	NAALADL2	488174	transcript	XM_005639935.3	protein_coding	2	c.524+10921T>G
34	38991465	T	G	PASS	intron_variant	MODIFIER	NAALADL2	488174	transcript	XM_005639938.3	protein_coding	2	c.494+10921T>G
34	39667945	G	A	PASS	intron_variant	MODIFIER	LOC111093911	111093911	transcript	XR_002622704.1	pseudogene	1	n.93+385G>A
34	39667945	G	A	PASS	non_coding_transcript_exon_variant	MODIFIER	LOC111093911	111093911	transcript	XR_002622703.1	pseudogene	1	n.379G>A
34	40170123	AT	A	PASS	intergenic_region	MODIFIER	LOC102156429-LOC111093867	102156429-111093867	intergenic_region	102156429-111093867		-1	n.40170124delT
34	40514241	G	A	GATKstd	downstream_gene_variant	MODIFIER	LOC111093930	111093930	transcript	XR_002622732.1	pseudogene	-1	n.*2369G>A
34	40514241	G	A	GATKstd	intergenic_region	MODIFIER	LOC111093930-TBL1XR1	111093930-488176	intergenic_region	111093930-488176		-1	n.40514241G>A
34	40545228	C	T	PASS	intergenic_region	MODIFIER	LOC111093930-TBL1XR1	111093930-488176	intergenic_region	111093930-488176		-1	n.40545228C>T
34	40721147	A	G	GATKstd	intergenic_region	MODIFIER	TBL1XR1-LOC106558199	488176-106558199	intergenic_region	488176-106558199		-1	n.40721147A>G
34	40807672	G	T	GATKstd	intron_variant	MODIFIER	LOC111093850	111093850	transcript	XR_002622540.1	pseudogene	2	n.2454-8285C>A
34	40807672	G	T	GATKstd	intron_variant	MODIFIER	LOC111093850	111093850	transcript	XR_002622539.1	pseudogene	1	n.839-8285C>A
34	40813575	G	A	GATKstd	upstream_gene_variant	MODIFIER	LOC111093852	111093852	transcript	XR_002622541.1	pseudogene	-1	n.-2922G>A
34	40813575	G	A	GATKstd	intron_variant	MODIFIER	LOC111093850	111093850	transcript	XR_002622540.1	pseudogene	2	n.2453+5818C>T
34	40813575	G	A	GATKstd	intron_variant	MODIFIER	LOC111093850	111093850	transcript	XR_002622539.1	pseudogene	1	n.838+5818C>T
34	40892375	G	T	GATKstd	intron_variant	MODIFIER	LOC111093857	111093857	transcript	XR_002622585.1	pseudogene	1	n.2136-11406G>T
34	40892375	G	T	GATKstd	intron_variant	MODIFIER	LOC111093857	111093857	transcript	XR_002622586.1	pseudogene	1	n.2131-11406G>T
34	40892375	G	T	GATKstd	intron_variant	MODIFIER	LOC111093857	111093857	transcript	XR_002622584.1	pseudogene	1	n.2122-11406G>T
35	7161609	C	A	GATKstd	intron_variant	MODIFIER	RREB1	488206	transcript	XM_022414534.1	protein_coding	1	c.-286-19901C>A
35	7161609	C	A	GATKstd	intron_variant	MODIFIER	RREB1	488206	transcript	XM_022414535.1	protein_coding	1	c.-286-19901C>A
35	7161609	C	A	GATKstd	intron_variant	MODIFIER	RREB1	488206	transcript	XM_022414539.1	protein_coding	1	c.-187-19901C>A
35	7161609	C	A	GATKstd	intron_variant	MODIFIER	RREB1	488206	transcript	XM_014110583.2	protein_coding	1	c.-286-19901C>A
35	7161609	C	A	GATKstd	intron_variant	MODIFIER	RREB1	488206	transcript	XM_022414540.1	protein_coding	1	c.-286-19901C>A
35	7161609	C	A	GATKstd	intron_variant	MODIFIER	RREB1	488206	transcript	XM_005640017.3	protein_coding	1	c.-286-19901C>A
35	7161609	C	A	GATKstd	intron_variant	MODIFIER	RREB1	488206	transcript	XM_022414537.1	protein_coding	1	c.-287+16727C>A
35	7161609	C	A	GATKstd	intron_variant	MODIFIER	RREB1	488206	transcript	XM_022414536.1	protein_coding	1	c.-287+14265C>A
35	23846094	C	T	PASS	intron_variant	MODIFIER	SLC17A2	488255	transcript	XM_022414408.1	protein_coding	10	c.649+128G>A
35	23846094	C	T	PASS	intron_variant	MODIFIER	SLC17A2	488255	transcript	XM_022414412.1	protein_coding	7	c.649+128G>A
35	23846094	C	T	PASS	intron_variant	MODIFIER	SLC17A2	488255	transcript	XM_022414413.1	protein_coding	8	c.649+128G>A
35	23846094	C	T	PASS	intron_variant	MODIFIER	SLC17A2	488255	transcript	XM_022414414.1	protein_coding	7	c.649+128G>A
35	23846094	C	T	PASS	intron_variant	MODIFIER	SLC17A2	488255	transcript	XM_022414415.1	protein_coding	6	c.649+128G>A
35	23846094	C	T	PASS	intron_variant	MODIFIER	SLC17A2	488255	transcript	XM_022414410.1	protein_coding	10	c.649+128G>A
35	23846094	C	T	PASS	intron_variant	MODIFIER	SLC17A2	488255	transcript	XM_014110647.2	protein_coding	10	c.649+128G>A
35	23846094	C	T	PASS	intron_variant	MODIFIER	SLC17A2	488255	transcript	XM_022414409.1	protein_coding	11	c.649+128G>A
35	23846094	C	T	PASS	intron_variant	MODIFIER	SLC17A2	488255	transcript	XM_022414411.1	protein_coding	10	c.649+128G>A
35	23974050	C	T	PASS	missense_variant	MODERATE	LOC488258	488258	transcript	XM_545380.4	protein_coding	1	c.628G>A	p.Ala210Thr
35	23974050	C	T	PASS	upstream_gene_variant	MODIFIER	LOC488263	488263	transcript	XM_005640101.3	protein_coding	-1	c.-3151C>T
35	24172895	TGG	T	PASS	downstream_gene_variant	MODIFIER	LOC488277	488277	transcript	XM_014110639.2	protein_coding	-1	c.*1642_*1643delCC
35	24172895	TGG	T	PASS	downstream_gene_variant	MODIFIER	LOC106558266	106558266	transcript	XM_014110640.2	protein_coding	-1	c.*4624_*4625delCC
35	24172895	TGG	T	PASS	downstream_gene_variant	MODIFIER	LOC488277	488277	transcript	XM_014110638.2	protein_coding	-1	c.*1642_*1643delCC
35	24172895	TGG	T	PASS	intergenic_region	MODIFIER	LOC100855588-LOC488277	100855588-488277	intergenic_region	100855588-488277		-1	n.24172896_24172897delGG
35	24556513	A	G	GATKstd	3_prime_UTR_variant	MODIFIER	LOC488290	488290	transcript	XM_022414602.1	protein_coding	1	c.*1271T>C
35	24556513	A	G	GATKstd	upstream_gene_variant	MODIFIER	LOC488291	488291	transcript	XM_545413.4	protein_coding	-1	c.-1980A>G
35	24556513	A	G	GATKstd	downstream_gene_variant	MODIFIER	LOC106558236	106558236	transcript	XM_014110521.2	protein_coding	-1	c.*187A>G
36	20279358	C	G	PASS	intergenic_region	MODIFIER	MTX2-LOC111094289	478811-111094289	intergenic_region	478811-111094289		-1	n.20279358C>G
37	9596134	G	C	PASS	upstream_gene_variant	MODIFIER	KCTD18	488464	transcript	XM_014110906.2	protein_coding	-1	c.-2237C>G
37	9596134	G	C	PASS	intergenic_region	MODIFIER	KCTD18-SGO2	488464-478863	intergenic_region	488464-478863		-1	n.9596134G>C
37	16160646	T	TCTCTCTGCACCCC	PASS	intergenic_region	MODIFIER	LOC100856432-PLEKHM3	100856432-478888	intergenic_region	100856432-478888		-1	n.16160646_16160647insCTCTCTGCACCCC
37	16160663	A	ACCCC	PASS	intergenic_region	MODIFIER	LOC100856432-PLEKHM3	100856432-478888	intergenic_region	100856432-478888		-1	n.16160663_16160664insCCCC
37	18856333	C	T	GATKstd	intergenic_region	MODIFIER	LOC111094401-LOC102153849	111094401-102153849	intergenic_region	111094401-102153849		-1	n.18856333C>T
37	28863833	G	GCTGGGCGGCCGGCGCCGGGCTCGACGCTGCGGCGGTGGCGGCGCGGCTGGGGCGGCGGCGGGGGCGGCGGCTGGGGCGGCGGGGCCCCCCCCGGGAGGGCGCGGGAGCTCGGGGGGTGCAGCCGGGC	PASS	intergenic_region	MODIFIER	LOC111094441-ACSL3	111094441-478927	intergenic_region	111094441-478927		-1	n.28863833_28863834insCTGGGCGGCCGGCGCCGGGCTCGACGCTGCGGCGGTGGCGGCGCGGCTGGGGCGGCGGCGGGGGCGGCGGCTGGGGCGGCGGGGCCCCCCCCGGGAGGGCGCGGGAGCTCGGGGGGTGCAGCCGGGC
3	26800500	GGGAA	G	PASS	upstream_gene_variant	MODIFIER	LOC111095161	111095161	transcript	XR_002624949.1	pseudogene	-1	n.-512_-509delTTCC
3	26800500	GGGAA	G	PASS	intron_variant	MODIFIER	SERINC5	479168	transcript	XM_536311.5	protein_coding	1	c.27+11936_27+11939delGGAA
3	54809928	A	T	GATKstd	intron_variant	MODIFIER	BTBD1	479057	transcript	XM_005618393.3	protein_coding	4	c.557-3175T>A
3	54809935	C	T	GATKstd	intron_variant	MODIFIER	BTBD1	479057	transcript	XM_005618393.3	protein_coding	4	c.556+3172G>A
3	71082449	C	CG	PASS	upstream_gene_variant	MODIFIER	CRMP1	479097	transcript	XM_005618585.3	protein_coding	-1	c.-4802_-4801insC
3	71082449	C	CG	PASS	downstream_gene_variant	MODIFIER	LOC111095284	111095284	transcript	XR_002625316.1	pseudogene	-1	n.*4571_*4572insC
3	71082449	C	CG	PASS	intergenic_region	MODIFIER	CRMP1-LOC111095284	479097-111095284	intergenic_region	479097-111095284		-1	n.71082449_71082450insG
3	71082455	G	GGCCGGTGACGCGCCGGAGCCGCAGCGC	PASS	upstream_gene_variant	MODIFIER	CRMP1	479097	transcript	XM_005618585.3	protein_coding	-1	c.-4808_-4807insGCGCTGCGGCTCCGGCGCGTCACCGGC
3	71082455	G	GGCCGGTGACGCGCCGGAGCCGCAGCGC	PASS	downstream_gene_variant	MODIFIER	LOC111095284	111095284	transcript	XR_002625316.1	pseudogene	-1	n.*4565_*4566insGCGCTGCGGCTCCGGCGCGTCACCGGC
3	71082455	G	GGCCGGTGACGCGCCGGAGCCGCAGCGC	PASS	intergenic_region	MODIFIER	CRMP1-LOC111095284	479097-111095284	intergenic_region	479097-111095284		-1	n.71082455_71082456insGCCGGTGACGCGCCGGAGCCGCAGCGC
3	71214926	C	CGTGCTTT	PASS	intron_variant	MODIFIER	JAKMIP1	488830	transcript	XM_022417200.1	protein_coding	19	c.2379+1256_2379+1257insAAAGCAC
3	71214926	C	CGTGCTTT	PASS	intron_variant	MODIFIER	JAKMIP1	488830	transcript	XM_022417201.1	protein_coding	20	c.2379+1256_2379+1257insAAAGCAC
3	71214926	C	CGTGCTTT	PASS	intron_variant	MODIFIER	JAKMIP1	488830	transcript	XM_022417203.1	protein_coding	18	c.1884+1256_1884+1257insAAAGCAC
3	71214926	C	CGTGCTTT	PASS	intron_variant	MODIFIER	JAKMIP1	488830	transcript	XM_022417202.1	protein_coding	20	c.2379+1256_2379+1257insAAAGCAC
3	71214929	C	T	GATKstd	intron_variant	MODIFIER	JAKMIP1	488830	transcript	XM_022417200.1	protein_coding	19	c.2379+1254G>A
3	71214929	C	T	GATKstd	intron_variant	MODIFIER	JAKMIP1	488830	transcript	XM_022417201.1	protein_coding	20	c.2379+1254G>A
3	71214929	C	T	GATKstd	intron_variant	MODIFIER	JAKMIP1	488830	transcript	XM_022417203.1	protein_coding	18	c.1884+1254G>A
3	71214929	C	T	GATKstd	intron_variant	MODIFIER	JAKMIP1	488830	transcript	XM_022417202.1	protein_coding	20	c.2379+1254G>A
3	89312685	A	G	PASS	upstream_gene_variant	MODIFIER	SLIT2	595148	transcript	XM_014112671.2	protein_coding	-1	c.-1080T>C
3	89312685	A	G	PASS	upstream_gene_variant	MODIFIER	SLIT2	595148	transcript	XM_014112672.2	protein_coding	-1	c.-1080T>C
3	89312685	A	G	PASS	upstream_gene_variant	MODIFIER	SLIT2	595148	transcript	XM_014112673.2	protein_coding	-1	c.-1080T>C
3	89312685	A	G	PASS	upstream_gene_variant	MODIFIER	SLIT2	595148	transcript	XM_014112674.2	protein_coding	-1	c.-1080T>C
3	89312685	A	G	PASS	upstream_gene_variant	MODIFIER	SLIT2	595148	transcript	XM_014112675.2	protein_coding	-1	c.-1080T>C
3	89312685	A	G	PASS	upstream_gene_variant	MODIFIER	SLIT2	595148	transcript	XM_022417276.1	protein_coding	-1	c.-1080T>C
3	89312685	A	G	PASS	intergenic_region	MODIFIER	SLIT2-LOC100688023	595148-100688023	intergenic_region	595148-100688023		-1	n.89312685A>G
3	89312686	G	T	PASS	upstream_gene_variant	MODIFIER	SLIT2	595148	transcript	XM_014112671.2	protein_coding	-1	c.-1081C>A
3	89312686	G	T	PASS	upstream_gene_variant	MODIFIER	SLIT2	595148	transcript	XM_014112672.2	protein_coding	-1	c.-1081C>A
3	89312686	G	T	PASS	upstream_gene_variant	MODIFIER	SLIT2	595148	transcript	XM_014112673.2	protein_coding	-1	c.-1081C>A
3	89312686	G	T	PASS	upstream_gene_variant	MODIFIER	SLIT2	595148	transcript	XM_014112674.2	protein_coding	-1	c.-1081C>A
3	89312686	G	T	PASS	upstream_gene_variant	MODIFIER	SLIT2	595148	transcript	XM_014112675.2	protein_coding	-1	c.-1081C>A
3	89312686	G	T	PASS	upstream_gene_variant	MODIFIER	SLIT2	595148	transcript	XM_022417276.1	protein_coding	-1	c.-1081C>A
3	89312686	G	T	PASS	intergenic_region	MODIFIER	SLIT2-LOC100688023	595148-100688023	intergenic_region	595148-100688023		-1	n.89312686G>T
3	90231780	T	C	GATKstd	intergenic_region	MODIFIER	LOC102156343-LOC106558598	102156343-106558598	intergenic_region	102156343-106558598		-1	n.90231780T>C
3	90819617	T	TTTTTTTTTTTTTTTTTTTTTTTTTAAATTTTTTATTTATTTATGATAGTCACACAGAGAG	PASS	intergenic_region	MODIFIER	LOC106558648-LOC102156563	106558648-102156563	intergenic_region	106558648-102156563		-1	n.90819617_90819618insTTTTTTTTTTTTTTTTTTTTTTTTAAATTTTTTATTTATTTATGATAGTCACACAGAGAG
4	11764509	G	T	GATKstd	intron_variant	MODIFIER	LOC111095699	111095699	transcript	XR_002626234.1	pseudogene	1	n.214+10525C>A
4	30514434	C	A	GATKstd	upstream_gene_variant	MODIFIER	NRG3	479263	transcript	XM_014112927.2	protein_coding	-1	c.-1456C>A
4	30514434	C	A	GATKstd	upstream_gene_variant	MODIFIER	NRG3	479263	transcript	XM_014112929.2	protein_coding	-1	c.-1456C>A
4	30514434	C	A	GATKstd	upstream_gene_variant	MODIFIER	NRG3	479263	transcript	XM_014112930.2	protein_coding	-1	c.-1456C>A
4	30514434	C	A	GATKstd	upstream_gene_variant	MODIFIER	NRG3	479263	transcript	XM_014112928.2	protein_coding	-1	c.-1456C>A
4	30514434	C	A	GATKstd	upstream_gene_variant	MODIFIER	NRG3	479263	transcript	XM_014112931.2	protein_coding	-1	c.-1456C>A
4	30514434	C	A	GATKstd	upstream_gene_variant	MODIFIER	NRG3	479263	transcript	XM_003434488.4	protein_coding	-1	c.-1456C>A
4	30514434	C	A	GATKstd	upstream_gene_variant	MODIFIER	NRG3	479263	transcript	XM_005619098.3	protein_coding	-1	c.-1456C>A
4	30514434	C	A	GATKstd	intergenic_region	MODIFIER	LOC102157353-NRG3	102157353-479263	intergenic_region	102157353-479263		-1	n.30514434C>A
4	33039460	C	G	GATKstd	upstream_gene_variant	MODIFIER	LOC102152514	102152514	transcript	XR_292053.2	pseudogene	-1	n.-4128C>G
4	33039460	C	G	GATKstd	intergenic_region	MODIFIER	LOC102152444-LOC102152514	102152444-102152514	intergenic_region	102152444-102152514		-1	n.33039460C>G
4	33087731	A	AAAG	PASS	intron_variant	MODIFIER	LOC111095520	111095520	transcript	XR_002625801.1	pseudogene	2	n.301+526_301+527insCTT
4	33421480	G	C	GATKstd	intergenic_region	MODIFIER	LOC111095747-GRID1	111095747-489075	intergenic_region	111095747-489075		-1	n.33421480G>C
4	33582762	C	G	GATKstd	intron_variant	MODIFIER	GRID1	489075	transcript	XM_022417615.1	protein_coding	11	c.2133-22926G>C
4	33707651	C	T	GATKstd	intron_variant	MODIFIER	GRID1	489075	transcript	XM_022417615.1	protein_coding	7	c.1368+10330G>A
4	33733296	C	T	GATKstd	intron_variant	MODIFIER	GRID1	489075	transcript	XM_022417615.1	protein_coding	4	c.916-1987G>A
4	33822076	AC	A	PASS	intron_variant	MODIFIER	GRID1	489075	transcript	XM_022417615.1	protein_coding	3	c.862-57315delG
4	34025049	C	T	PASS	intron_variant	MODIFIER	GRID1	489075	transcript	XM_022417615.1	protein_coding	1	c.371-500G>A
4	34041413	G	A	GATKstd	intron_variant	MODIFIER	GRID1	489075	transcript	XM_022417615.1	protein_coding	1	c.371-16864C>T
4	34143544	C	A	GATKstd	intron_variant	MODIFIER	GRID1	489075	transcript	XM_022417615.1	protein_coding	1	c.370+11645G>T
4	34154733	C	T	GATKstd	intron_variant	MODIFIER	GRID1	489075	transcript	XM_022417615.1	protein_coding	1	c.370+456G>A
4	34501185	TC	T	PASS	intron_variant	MODIFIER	BMPR1A	489077	transcript	XM_005618880.3	protein_coding	1	c.-268+1172delC
4	36277679	A	ATTTGTTTCCTTTTCTTTTTTTTTTTTTTTTTTTTTTTTTTTTTTTTTTTTTTTTTTGTTTTTTTTTTTTGTTTTTT	PASS	intron_variant	MODIFIER	ZNF346	612983	transcript	XM_014112992.2	protein_coding	5	c.752-3060_752-3059insAAAAAACAAAAAAAAAAAACAAAAAAAAAAAAAAAAAAAAAAAAAAAAAAAAAAAAAAAAAAGAAAAGGAAACAAA
4	36277679	A	ATTTGTTTCCTTTTCTTTTTTTTTTTTTTTTTTTTTTTTTTTTTTTTTTTTTTTTTTGTTTTTTTTTTTTGTTTTTT	PASS	intron_variant	MODIFIER	C4H15orf48	102152168	transcript	XM_022417966.1	protein_coding	1	c.22-1214_22-1213insTTTGTTTCCTTTTCTTTTTTTTTTTTTTTTTTTTTTTTTTTTTTTTTTTTTTTTTTGTTTTTTTTTTTTGTTTTTT
4	36277679	A	ATTTGTTTCCTTTTCTTTTTTTTTTTTTTTTTTTTTTTTTTTTTTTTTTTTTTTTTTGTTTTTTTTTTTTGTTTTTT	PASS	intron_variant	MODIFIER	ZNF346	612983	transcript	XM_014112994.2	protein_coding	5	c.569-3060_569-3059insAAAAAACAAAAAAAAAAAACAAAAAAAAAAAAAAAAAAAAAAAAAAAAAAAAAAAAAAAAAAGAAAAGGAAACAAA
4	36277679	A	ATTTGTTTCCTTTTCTTTTTTTTTTTTTTTTTTTTTTTTTTTTTTTTTTTTTTTTTTGTTTTTTTTTTTTGTTTTTT	PASS	intron_variant	MODIFIER	ZNF346	612983	transcript	XM_014112995.2	protein_coding	4	c.518-3060_518-3059insAAAAAACAAAAAAAAAAAACAAAAAAAAAAAAAAAAAAAAAAAAAAAAAAAAAAAAAAAAAAGAAAAGGAAACAAA
4	36277679	A	ATTTGTTTCCTTTTCTTTTTTTTTTTTTTTTTTTTTTTTTTTTTTTTTTTTTTTTTTGTTTTTTTTTTTTGTTTTTT	PASS	intron_variant	MODIFIER	ZNF346	612983	transcript	XM_848942.4	protein_coding	5	c.704-3060_704-3059insAAAAAACAAAAAAAAAAAACAAAAAAAAAAAAAAAAAAAAAAAAAAAAAAAAAAAAAAAAAAGAAAAGGAAACAAA
4	36277679	A	ATTTGTTTCCTTTTCTTTTTTTTTTTTTTTTTTTTTTTTTTTTTTTTTTTTTTTTTTGTTTTTTTTTTTTGTTTTTT	PASS	intron_variant	MODIFIER	ZNF346	612983	transcript	XR_002625840.1	pseudogene	5	n.805-1949_805-1948insAAAAAACAAAAAAAAAAAACAAAAAAAAAAAAAAAAAAAAAAAAAAAAAAAAAAAAAAAAAAGAAAAGGAAACAAA
4	40801842	T	TAGAGATGCAGAGAGAGAGAGAGAGAG	PASS	intergenic_region	MODIFIER	NPM1-TLX3	479292-489123	intergenic_region	479292-489123		-1	n.40801842_40801843insAGAGATGCAGAGAGAGAGAGAGAGAG
4	60185425	C	CACCCGCCGGGGCAGGGGGCGTGGAGCGCGCGCAGCCCGGCCCCGCCGGCCCGGGAGGAG	PASS	intergenic_region	MODIFIER	LOC612325-LOC111095720	612325-111095720	intergenic_region	612325-111095720		-1	n.60185425_60185426insACCCGCCGGGGCAGGGGGCGTGGAGCGCGCGCAGCCCGGCCCCGCCGGCCCGGGAGGAG
5	668983	CCATCGGGTCAGCACTGCGCCTGCGCTGGAGCCCGCG	C	PASS	upstream_gene_variant	MODIFIER	LOC100687391	100687391	transcript	XM_014113266.2	protein_coding	-1	c.-708_-673delCATCGGGTCAGCACTGCGCCTGCGCTGGAGCCCGCG
5	668983	CCATCGGGTCAGCACTGCGCCTGCGCTGGAGCCCGCG	C	PASS	intergenic_region	MODIFIER	LOC111095763-LOC100687391	111095763-100687391	intergenic_region	111095763-100687391		-1	n.668984_669019delCATCGGGTCAGCACTGCGCCTGCGCTGGAGCCCGCG
5	29551190	TCCAC	T	PASS	intron_variant	MODIFIER	ANGPTL5	611905	transcript	XM_022418394.1	protein_coding	2	c.-46+6234_-46+6237delCCAC
5	29551190	TCCAC	T	PASS	intron_variant	MODIFIER	ANGPTL5	611905	transcript	XM_022418393.1	protein_coding	2	c.-46+6234_-46+6237delCCAC
5	29551195	G	GT	PASS	intron_variant	MODIFIER	ANGPTL5	611905	transcript	XM_022418394.1	protein_coding	2	c.-46+6238_-46+6239insT
5	29551195	G	GT	PASS	intron_variant	MODIFIER	ANGPTL5	611905	transcript	XM_022418393.1	protein_coding	2	c.-46+6238_-46+6239insT
5	29551202	G	T	GATKstd	intron_variant	MODIFIER	ANGPTL5	611905	transcript	XM_022418394.1	protein_coding	2	c.-46+6245G>T
5	29551202	G	T	GATKstd	intron_variant	MODIFIER	ANGPTL5	611905	transcript	XM_022418393.1	protein_coding	2	c.-46+6245G>T
5	29551203	A	G	GATKstd	intron_variant	MODIFIER	ANGPTL5	611905	transcript	XM_022418394.1	protein_coding	2	c.-46+6246A>G
5	29551203	A	G	GATKstd	intron_variant	MODIFIER	ANGPTL5	611905	transcript	XM_022418393.1	protein_coding	2	c.-46+6246A>G
5	37909525	A	G	GATKstd	intron_variant	MODIFIER	LOC489515	489515	transcript	XM_546634.6	protein_coding	4	c.612+25123A>G
5	37909527	T	C	GATKstd	intron_variant	MODIFIER	LOC489515	489515	transcript	XM_546634.6	protein_coding	4	c.612+25125T>C
5	78121423	A	ATAGCAGGAGAATTTCTTTTTTTTTTTTTTTTTTTTTTTTTTTTTTTTTTTTTTTTTT	PASS	intergenic_region	MODIFIER	LOC100856440-LOC106558859	100856440-106558859	intergenic_region	100856440-106558859		-1	n.78121423_78121424insTAGCAGGAGAATTTCTTTTTTTTTTTTTTTTTTTTTTTTTTTTTTTTTTTTTTTTTT
5	79782868	C	T	GATKstd	upstream_gene_variant	MODIFIER	PSMD7	479671	transcript	XM_536802.6	protein_coding	-1	c.-2854C>T
5	79782868	C	T	GATKstd	intergenic_region	MODIFIER	LOC111096049-PSMD7	111096049-479671	intergenic_region	111096049-479671		-1	n.79782868C>T
5	81507939	G	A	GATKstd	missense_variant	MODERATE	LOC611083	611083	transcript	XM_022419301.1	protein_coding	4	c.572G>A	p.Arg191His
5	86176358	C	T	GATKstd	intergenic_region	MODIFIER	LOC111096063-LOC102153075	111096063-102153075	intergenic_region	111096063-102153075		-1	n.86176358C>T
5	86831530	TTC	T	PASS	intergenic_region	MODIFIER	CDH8-LOC111096064	489777-111096064	intergenic_region	489777-111096064		-1	n.86831531_86831532delTC
6	3145	C	A	GATKstd	intergenic_region	MODIFIER	CHR_START-LOC106558875	CHR_START-106558875	intergenic_region	CHR_START-106558875		-1	n.3145C>A
6	13553933	G	C	GATKstd	intron_variant	MODIFIER	SDK1	489886	transcript	XM_022419770.1	protein_coding	3	c.459-57305C>G
6	13553933	G	C	GATKstd	intron_variant	MODIFIER	SDK1	489886	transcript	XM_022419777.1	protein_coding	1	c.9-57305C>G
6	13553933	G	C	GATKstd	intron_variant	MODIFIER	SDK1	489886	transcript	XM_005621149.3	protein_coding	1	c.54-57305C>G
6	13553933	G	C	GATKstd	intron_variant	MODIFIER	SDK1	489886	transcript	XM_022419778.1	protein_coding	2	c.-157-57305C>G
6	13553933	G	C	GATKstd	intron_variant	MODIFIER	SDK1	489886	transcript	XM_022419776.1	protein_coding	3	c.192-57305C>G
6	13553933	G	C	GATKstd	intron_variant	MODIFIER	SDK1	489886	transcript	XM_022419775.1	protein_coding	3	c.192-57305C>G
6	13553933	G	C	GATKstd	intron_variant	MODIFIER	SDK1	489886	transcript	XM_022419771.1	protein_coding	3	c.459-57305C>G
6	13553933	G	C	GATKstd	intron_variant	MODIFIER	SDK1	489886	transcript	XM_022419772.1	protein_coding	3	c.459-57305C>G
6	13553933	G	C	GATKstd	intron_variant	MODIFIER	SDK1	489886	transcript	XM_022419773.1	protein_coding	3	c.459-57305C>G
6	13553933	G	C	GATKstd	intron_variant	MODIFIER	SDK1	489886	transcript	XM_022419774.1	protein_coding	3	c.459-57305C>G
6	13829420	C	T	GATKstd	intergenic_region	MODIFIER	LOC111096489-MIR8873A	111096489-104795006	intergenic_region	111096489-104795006		-1	n.13829420C>T
6	21232628	G	GACAT	PASS	intergenic_region	MODIFIER	SLC5A11-TNRC6A	489965-489966	intergenic_region	489965-489966		-1	n.21232628_21232629insACAT
6	42454448	A	AGCCCCCCCGG	PASS	upstream_gene_variant	MODIFIER	LOC111096352	111096352	transcript	XR_002627721.1	pseudogene	-1	n.-694_-693insCCGGGGGGGC
6	42454448	A	AGCCCCCCCGG	PASS	upstream_gene_variant	MODIFIER	LOC111096352	111096352	transcript	XR_002627722.1	pseudogene	-1	n.-695_-694insCCGGGGGGGC
6	42454448	A	AGCCCCCCCGG	PASS	upstream_gene_variant	MODIFIER	LOC111096352	111096352	transcript	XR_002627723.1	pseudogene	-1	n.-694_-693insCCGGGGGGGC
6	42454448	A	AGCCCCCCCGG	PASS	upstream_gene_variant	MODIFIER	SORT1	479915	transcript	XM_022420359.1	protein_coding	-1	c.-23646_-23645insGCCCCCCCGG
6	42454448	A	AGCCCCCCCGG	PASS	downstream_gene_variant	MODIFIER	PSMA5	100856348	transcript	XM_003639136.4	protein_coding	-1	c.*4547_*4548insGCCCCCCCGG
6	42454448	A	AGCCCCCCCGG	PASS	intron_variant	MODIFIER	SORT1	479915	transcript	XM_022420357.1	protein_coding	1	c.291+36_291+37insGCCCCCCCGG
6	42454448	A	AGCCCCCCCGG	PASS	intron_variant	MODIFIER	SORT1	479915	transcript	XM_005621823.3	protein_coding	1	c.291+36_291+37insGCCCCCCCGG
6	42454448	A	AGCCCCCCCGG	PASS	intron_variant	MODIFIER	SORT1	479915	transcript	XM_014114763.2	protein_coding	1	c.291+36_291+37insGCCCCCCCGG
6	42454448	A	AGCCCCCCCGG	PASS	intron_variant	MODIFIER	SORT1	479915	transcript	XM_022420358.1	protein_coding	1	c.291+36_291+37insGCCCCCCCGG
6	42454449	T	C	GATKstd	upstream_gene_variant	MODIFIER	LOC111096352	111096352	transcript	XR_002627721.1	pseudogene	-1	n.-694A>G
6	42454449	T	C	GATKstd	upstream_gene_variant	MODIFIER	LOC111096352	111096352	transcript	XR_002627722.1	pseudogene	-1	n.-695A>G
6	42454449	T	C	GATKstd	upstream_gene_variant	MODIFIER	LOC111096352	111096352	transcript	XR_002627723.1	pseudogene	-1	n.-694A>G
6	42454449	T	C	GATKstd	upstream_gene_variant	MODIFIER	SORT1	479915	transcript	XM_022420359.1	protein_coding	-1	c.-23645T>C
6	42454449	T	C	GATKstd	downstream_gene_variant	MODIFIER	PSMA5	100856348	transcript	XM_003639136.4	protein_coding	-1	c.*4548T>C
6	42454449	T	C	GATKstd	intron_variant	MODIFIER	SORT1	479915	transcript	XM_022420357.1	protein_coding	1	c.291+37T>C
6	42454449	T	C	GATKstd	intron_variant	MODIFIER	SORT1	479915	transcript	XM_005621823.3	protein_coding	1	c.291+37T>C
6	42454449	T	C	GATKstd	intron_variant	MODIFIER	SORT1	479915	transcript	XM_014114763.2	protein_coding	1	c.291+37T>C
6	42454449	T	C	GATKstd	intron_variant	MODIFIER	SORT1	479915	transcript	XM_022420358.1	protein_coding	1	c.291+37T>C
6	47133169	A	G	GATKstd	intergenic_region	MODIFIER	LOC111096366-LOC100685796	111096366-100685796	intergenic_region	111096366-100685796		-1	n.47133169A>G
6	48063079	TA	T	PASS	intergenic_region	MODIFIER	LOC111096367-OLFM3	111096367-490137	intergenic_region	111096367-490137		-1	n.48063080delA
6	51631838	AC	A	PASS	intergenic_region	MODIFIER	SNX7-MIR137	490148-100885936	intergenic_region	490148-100885936		-1	n.51631839delC
6	59019595	T	C	GATKstd	downstream_gene_variant	MODIFIER	LRRC8B	479958	transcript	XM_005621953.3	protein_coding	-1	c.*7076A>G
6	59019595	T	C	GATKstd	downstream_gene_variant	MODIFIER	LRRC8B	479958	transcript	XR_002627863.1	pseudogene	-1	n.*1088A>G
6	59019595	T	C	GATKstd	downstream_gene_variant	MODIFIER	LRRC8B	479958	transcript	XM_022420528.1	protein_coding	-1	c.*1887A>G
6	59019595	T	C	GATKstd	downstream_gene_variant	MODIFIER	LRRC8B	479958	transcript	XM_022420527.1	protein_coding	-1	c.*7076A>G
6	59019595	T	C	GATKstd	intron_variant	MODIFIER	LOC111096405	111096405	transcript	XR_002627866.1	pseudogene	2	n.531+6802T>C
6	59019595	T	C	GATKstd	intron_variant	MODIFIER	LRRC8B	479958	transcript	XR_002627862.1	pseudogene	6	n.2588-821A>G
6	59019595	T	C	GATKstd	intron_variant	MODIFIER	LRRC8B	479958	transcript	XR_002627859.1	pseudogene	6	n.2588-821A>G
6	59019595	T	C	GATKstd	intron_variant	MODIFIER	LRRC8B	479958	transcript	XR_002627861.1	pseudogene	6	n.2588-821A>G
6	59019595	T	C	GATKstd	intron_variant	MODIFIER	LRRC8B	479958	transcript	XR_002627864.1	pseudogene	5	n.2458-821A>G
6	59019595	T	C	GATKstd	intron_variant	MODIFIER	LOC111096405	111096405	transcript	XR_002627865.1	pseudogene	1	n.138+6802T>C
6	59019595	T	C	GATKstd	intron_variant	MODIFIER	LRRC8B	479958	transcript	XR_002627860.1	pseudogene	6	n.2588-821A>G
6	69370841	G	A	GATKstd	intron_variant	MODIFIER	AK5	490204	transcript	XM_547325.6	protein_coding	8	c.1059+17990C>T
6	69370841	G	A	GATKstd	intron_variant	MODIFIER	AK5	490204	transcript	XM_005622053.3	protein_coding	8	c.987+17990C>T
6	69370841	G	A	GATKstd	intron_variant	MODIFIER	AK5	490204	transcript	XM_022420615.1	protein_coding	7	c.867+17990C>T
7	36087355	G	C	PASS	upstream_gene_variant	MODIFIER	KIF26B	490379	transcript	XM_547500.6	protein_coding	-1	c.-695G>C
7	36087355	G	C	PASS	intergenic_region	MODIFIER	EFCAB2-KIF26B	611783-490379	intergenic_region	611783-490379		-1	n.36087355G>C
7	39628218	T	G	GATKstd	intron_variant	MODIFIER	DNAH14	480114	transcript	XM_014115269.2	protein_coding	1	c.-63-10429A>C
7	39628218	T	G	GATKstd	intron_variant	MODIFIER	DNAH14	480114	transcript	XM_022421196.1	protein_coding	1	c.-63-10429A>C
7	39628218	T	G	GATKstd	intron_variant	MODIFIER	DNAH14	480114	transcript	XM_022421193.1	protein_coding	1	c.-63-10429A>C
7	39628218	T	G	GATKstd	intron_variant	MODIFIER	DNAH14	480114	transcript	XM_022421197.1	protein_coding	1	c.-63-10429A>C
7	39628218	T	G	GATKstd	intron_variant	MODIFIER	DNAH14	480114	transcript	XM_022421198.1	protein_coding	1	c.-63-10429A>C
7	39628218	T	G	GATKstd	intron_variant	MODIFIER	DNAH14	480114	transcript	XM_022421199.1	protein_coding	1	c.-63-10429A>C
7	39628218	T	G	GATKstd	intron_variant	MODIFIER	DNAH14	480114	transcript	XM_022421200.1	protein_coding	1	c.-63-10429A>C
7	39628218	T	G	GATKstd	intron_variant	MODIFIER	DNAH14	480114	transcript	XM_022421201.1	protein_coding	1	c.-63-10429A>C
7	39628218	T	G	GATKstd	intron_variant	MODIFIER	DNAH14	480114	transcript	XM_022421203.1	protein_coding	1	c.-63-10429A>C
7	39628218	T	G	GATKstd	intron_variant	MODIFIER	DNAH14	480114	transcript	XM_022421194.1	protein_coding	1	c.-63-10429A>C
7	39628218	T	G	GATKstd	intron_variant	MODIFIER	DNAH14	480114	transcript	XM_022421195.1	protein_coding	2	c.-63-10429A>C
7	39628218	T	G	GATKstd	intron_variant	MODIFIER	DNAH14	480114	transcript	XR_002628477.1	pseudogene	1	n.200-10429A>C
7	39628218	T	G	GATKstd	intron_variant	MODIFIER	DNAH14	480114	transcript	XR_002628478.1	pseudogene	1	n.200-10429A>C
7	39628218	T	G	GATKstd	intron_variant	MODIFIER	DNAH14	480114	transcript	XM_022421204.1	protein_coding	1	c.-63-10429A>C
7	39628226	G	C	GATKstd	intron_variant	MODIFIER	DNAH14	480114	transcript	XM_014115269.2	protein_coding	1	c.-63-10437C>G
7	39628226	G	C	GATKstd	intron_variant	MODIFIER	DNAH14	480114	transcript	XM_022421196.1	protein_coding	1	c.-63-10437C>G
7	39628226	G	C	GATKstd	intron_variant	MODIFIER	DNAH14	480114	transcript	XM_022421193.1	protein_coding	1	c.-63-10437C>G
7	39628226	G	C	GATKstd	intron_variant	MODIFIER	DNAH14	480114	transcript	XM_022421197.1	protein_coding	1	c.-63-10437C>G
7	39628226	G	C	GATKstd	intron_variant	MODIFIER	DNAH14	480114	transcript	XM_022421198.1	protein_coding	1	c.-63-10437C>G
7	39628226	G	C	GATKstd	intron_variant	MODIFIER	DNAH14	480114	transcript	XM_022421199.1	protein_coding	1	c.-63-10437C>G
7	39628226	G	C	GATKstd	intron_variant	MODIFIER	DNAH14	480114	transcript	XM_022421200.1	protein_coding	1	c.-63-10437C>G
7	39628226	G	C	GATKstd	intron_variant	MODIFIER	DNAH14	480114	transcript	XM_022421201.1	protein_coding	1	c.-63-10437C>G
7	39628226	G	C	GATKstd	intron_variant	MODIFIER	DNAH14	480114	transcript	XM_022421203.1	protein_coding	1	c.-63-10437C>G
7	39628226	G	C	GATKstd	intron_variant	MODIFIER	DNAH14	480114	transcript	XM_022421194.1	protein_coding	1	c.-63-10437C>G
7	39628226	G	C	GATKstd	intron_variant	MODIFIER	DNAH14	480114	transcript	XM_022421195.1	protein_coding	2	c.-63-10437C>G
7	39628226	G	C	GATKstd	intron_variant	MODIFIER	DNAH14	480114	transcript	XR_002628477.1	pseudogene	1	n.200-10437C>G
7	39628226	G	C	GATKstd	intron_variant	MODIFIER	DNAH14	480114	transcript	XR_002628478.1	pseudogene	1	n.200-10437C>G
7	39628226	G	C	GATKstd	intron_variant	MODIFIER	DNAH14	480114	transcript	XM_022421204.1	protein_coding	1	c.-63-10437C>G
7	42495171	T	TTTTTTTTTTTTTTTTTTTAATTTTTTTTTTTTTATTTATTTATG	PASS	upstream_gene_variant	MODIFIER	FLAD1	490438	transcript	XM_005622776.3	protein_coding	-1	c.-1265_-1264insCATAAATAAATAAAAAAAAAAAAATTAAAAAAAAAAAAAAAAAA
7	42495171	T	TTTTTTTTTTTTTTTTTTTAATTTTTTTTTTTTTATTTATTTATG	PASS	upstream_gene_variant	MODIFIER	FLAD1	490438	transcript	XM_849970.5	protein_coding	-1	c.-1265_-1264insCATAAATAAATAAAAAAAAAAAAATTAAAAAAAAAAAAAAAAAA
7	42495171	T	TTTTTTTTTTTTTTTTTTTAATTTTTTTTTTTTTATTTATTTATG	PASS	upstream_gene_variant	MODIFIER	FLAD1	490438	transcript	XM_022421322.1	protein_coding	-1	c.-1265_-1264insCATAAATAAATAAAAAAAAAAAAATTAAAAAAAAAAAAAAAAAA
7	42495171	T	TTTTTTTTTTTTTTTTTTTAATTTTTTTTTTTTTATTTATTTATG	PASS	downstream_gene_variant	MODIFIER	CKS1B	612237	transcript	XM_849974.5	protein_coding	-1	c.*2175_*2176insCATAAATAAATAAAAAAAAAAAAATTAAAAAAAAAAAAAAAAAA
7	42495171	T	TTTTTTTTTTTTTTTTTTTAATTTTTTTTTTTTTATTTATTTATG	PASS	intergenic_region	MODIFIER	FLAD1-CKS1B	490438-612237	intergenic_region	490438-612237		-1	n.42495171_42495172insTTTTTTTTTTTTTTTTTTAATTTTTTTTTTTTTATTTATTTATG
7	43269113	A	G	GATKstd	intron_variant	MODIFIER	GATAD2B	490453	transcript	XM_014115412.2	protein_coding	1	c.-1-10256A>G
7	43269113	A	G	GATKstd	intron_variant	MODIFIER	GATAD2B	490453	transcript	XM_022421394.1	protein_coding	1	c.-3-10254A>G
7	43269113	A	G	GATKstd	intron_variant	MODIFIER	GATAD2B	490453	transcript	XM_547575.5	protein_coding	1	c.-3-10254A>G
7	43696732	C	T	PASS	upstream_gene_variant	MODIFIER	LOC111096744	111096744	transcript	XR_002628564.1	pseudogene	-1	n.-430G>A
7	43696732	C	T	PASS	upstream_gene_variant	MODIFIER	SMAD2	480144	transcript	XM_005622830.3	protein_coding	-1	c.-23497C>T
7	43696732	C	T	PASS	upstream_gene_variant	MODIFIER	SMAD2	480144	transcript	XM_022421406.1	protein_coding	-1	c.-23497C>T
7	43696732	C	T	PASS	upstream_gene_variant	MODIFIER	SMAD2	480144	transcript	XM_005622832.3	protein_coding	-1	c.-23497C>T
7	43696732	C	T	PASS	upstream_gene_variant	MODIFIER	SMAD2	480144	transcript	XM_005622831.3	protein_coding	-1	c.-23497C>T
7	43696732	C	T	PASS	upstream_gene_variant	MODIFIER	SMAD2	480144	transcript	XM_847706.5	protein_coding	-1	c.-23497C>T
7	43696732	C	T	PASS	upstream_gene_variant	MODIFIER	SMAD2	480144	transcript	XM_861095.5	protein_coding	-1	c.-23497C>T
7	43696732	C	T	PASS	upstream_gene_variant	MODIFIER	SMAD2	480144	transcript	XM_022421405.1	protein_coding	-1	c.-23497C>T
7	43696732	C	T	PASS	intergenic_region	MODIFIER	LOC111096744-SMAD2	111096744-480144	intergenic_region	111096744-480144		-1	n.43696732C>T
7	44707339	G	A	GATKstd	intron_variant	MODIFIER	LOXHD1	490467	transcript	XM_022421426.1	protein_coding	6	c.759+2251G>A
7	56147281	C	T	GATKstd	intron_variant	MODIFIER	ASXL3	490492	transcript	XM_022421720.1	protein_coding	8	c.924+18442G>A
7	57890164	G	T	PASS	intron_variant	MODIFIER	B4GALT6	490499	transcript	XM_022421507.1	protein_coding	4	c.506-6875G>T
7	57890164	G	T	PASS	intron_variant	MODIFIER	B4GALT6	490499	transcript	XM_547621.6	protein_coding	3	c.347-6899G>T
7	58012123	C	T	PASS	intron_variant	MODIFIER	DSG2	490500	transcript	XM_005622932.3	protein_coding	1	c.40-4633G>A
7	58120169	G	A	PASS	intron_variant	MODIFIER	DSG4	612592	transcript	XM_022421722.1	protein_coding	8	c.1074+2421C>T
7	58163635	TAGCCC	T	PASS	frameshift_variant	HIGH	DSG1	403401	transcript	XM_005622216.3	protein_coding	16	c.2541_2545delGGGCT	p.Gly848fs
7	58163635	TAGCCC	T	PASS	frameshift_variant	HIGH	DSG1	403401	transcript	XM_005622217.3	protein_coding	16	c.2541_2545delGGGCT	p.Gly848fs
7	58163635	TAGCCC	T	PASS	frameshift_variant	HIGH	DSG1	403401	transcript	NM_001002939.1	protein_coding	15	c.2541_2545delGGGCT	p.Gly848fs
7	58175365	G	GATAA	PASS	intron_variant	MODIFIER	DSG1	403401	transcript	XM_005622216.3	protein_coding	9	c.1005+916_1005+917insTTAT
7	58175365	G	GATAA	PASS	intron_variant	MODIFIER	DSG1	403401	transcript	XM_005622217.3	protein_coding	9	c.1005+916_1005+917insTTAT
7	58175365	G	GATAA	PASS	intron_variant	MODIFIER	DSG1	403401	transcript	NM_001002939.1	protein_coding	8	c.1005+916_1005+917insTTAT
7	58812413	G	A	PASS	intergenic_region	MODIFIER	LOC100685526-LOC100685615	100685526-100685615	intergenic_region	100685526-100685615		-1	n.58812413G>A
7	60636257	CA	C	PASS	intergenic_region	MODIFIER	LOC100685947-CDH2	100685947-480169	intergenic_region	100685947-480169		-1	n.60636258delA
7	61993819	CT	C	PASS	intergenic_region	MODIFIER	AQP4-LOC111096790	612628-111096790	intergenic_region	612628-111096790		-1	n.61993820delT
7	62445670	TTTTA	T	PASS	intron_variant	MODIFIER	PSMA8	100856395	transcript	XM_003639174.3	protein_coding	3	c.354+1607_354+1610delTAAA
7	62445670	TTTTA	T	PASS	intron_variant	MODIFIER	PSMA8	100856395	transcript	XM_022421515.1	protein_coding	3	c.354+1607_354+1610delTAAA
7	68512972	A	AAGAAGTTGCCATGGCTGAGTTCAAAAAGGGTGTTGCCTGTGTTCTCCTCTAGGATTTT	PASS	upstream_gene_variant	MODIFIER	LOC100683484	100683484	transcript	100683484	pseudogene	-1	n.-999_-998insAGAAGTTGCCATGGCTGAGTTCAAAAAGGGTGTTGCCTGTGTTCTCCTCTAGGATTTT
7	68512972	A	AAGAAGTTGCCATGGCTGAGTTCAAAAAGGGTGTTGCCTGTGTTCTCCTCTAGGATTTT	PASS	intergenic_region	MODIFIER	LOC480188-LOC100683484	480188-100683484	intergenic_region	480188-100683484		-1	n.68512972_68512973insAGAAGTTGCCATGGCTGAGTTCAAAAAGGGTGTTGCCTGTGTTCTCCTCTAGGATTTT
7	71435607	C	CCGGGCG	PASS	intergenic_region	MODIFIER	LOC100856589-AKAIN1	100856589-106559075	intergenic_region	100856589-106559075		-1	n.71435607_71435608insCGGGCG
7	80547987	A	AAGAAGAAGAAGAAGAAGAAGAAGAGAAGAAG	PASS	upstream_gene_variant	MODIFIER	SKA1	491691	transcript	XM_548812.6	protein_coding	-1	c.-4323_-4322insAGAAGAAGAAGAAGAAGAAGAAGAGAAGAAG
7	80547987	A	AAGAAGAAGAAGAAGAAGAAGAAGAGAAGAAG	PASS	upstream_gene_variant	MODIFIER	SKA1	491691	transcript	XR_002628837.1	pseudogene	-1	n.-4262_-4261insAGAAGAAGAAGAAGAAGAAGAAGAGAAGAAG
7	80547987	A	AAGAAGAAGAAGAAGAAGAAGAAGAGAAGAAG	PASS	intergenic_region	MODIFIER	LOC111096844-SKA1	111096844-491691	intergenic_region	111096844-491691		-1	n.80547987_80547988insAGAAGAAGAAGAAGAAGAAGAAGAGAAGAAG
8	29666209	C	T	GATKstd	intron_variant	MODIFIER			transcript	TRANSCRIPT_	protein_coding	283	c.64611+2034408C>T		WARNING_TRANSCRIPT_MULTIPLE_STOP_CODONS
8	29666209	C	T	GATKstd	intron_variant	MODIFIER	LOC100686192	100686192	transcript	XR_001316691.2	pseudogene	3	n.382+34525G>A
8	29666209	C	T	GATKstd	intron_variant	MODIFIER	LOC100686192	100686192	transcript	XR_001316692.2	pseudogene	2	n.300-36619G>A
9	7377155	C	T	GATKstd	intron_variant	MODIFIER	LOC111097301	111097301	transcript	XM_022422759.1	protein_coding	1	c.528+2762G>A
9	16683199	A	G	GATKstd	intergenic_region	MODIFIER	LOC111097529-LOC111097336	111097529-111097336	intergenic_region	111097529-111097336		-1	n.16683199A>G
9	23663196	T	TCCCTTCCCTTCCCTTCCCTG	PASS	downstream_gene_variant	MODIFIER	SRCIN1	491037	transcript	XM_014116609.2	protein_coding	-1	c.*3956_*3957insCCCTTCCCTTCCCTTCCCTG
9	23663196	T	TCCCTTCCCTTCCCTTCCCTG	PASS	downstream_gene_variant	MODIFIER	SRCIN1	491037	transcript	XM_022423043.1	protein_coding	-1	c.*3956_*3957insCCCTTCCCTTCCCTTCCCTG
9	23663196	T	TCCCTTCCCTTCCCTTCCCTG	PASS	downstream_gene_variant	MODIFIER	SRCIN1	491037	transcript	XM_022423042.1	protein_coding	-1	c.*3956_*3957insCCCTTCCCTTCCCTTCCCTG
9	23663196	T	TCCCTTCCCTTCCCTTCCCTG	PASS	downstream_gene_variant	MODIFIER	SRCIN1	491037	transcript	XM_022423036.1	protein_coding	-1	c.*3956_*3957insCCCTTCCCTTCCCTTCCCTG
9	23663196	T	TCCCTTCCCTTCCCTTCCCTG	PASS	downstream_gene_variant	MODIFIER	SRCIN1	491037	transcript	XM_022423038.1	protein_coding	-1	c.*3956_*3957insCCCTTCCCTTCCCTTCCCTG
9	23663196	T	TCCCTTCCCTTCCCTTCCCTG	PASS	downstream_gene_variant	MODIFIER	SRCIN1	491037	transcript	XM_014116611.2	protein_coding	-1	c.*3956_*3957insCCCTTCCCTTCCCTTCCCTG
9	23663196	T	TCCCTTCCCTTCCCTTCCCTG	PASS	downstream_gene_variant	MODIFIER	SRCIN1	491037	transcript	XM_005624586.3	protein_coding	-1	c.*3956_*3957insCCCTTCCCTTCCCTTCCCTG
9	23663196	T	TCCCTTCCCTTCCCTTCCCTG	PASS	downstream_gene_variant	MODIFIER	SRCIN1	491037	transcript	XM_014116612.2	protein_coding	-1	c.*3956_*3957insCCCTTCCCTTCCCTTCCCTG
9	23663196	T	TCCCTTCCCTTCCCTTCCCTG	PASS	downstream_gene_variant	MODIFIER	SRCIN1	491037	transcript	XM_022423039.1	protein_coding	-1	c.*3956_*3957insCCCTTCCCTTCCCTTCCCTG
9	23663196	T	TCCCTTCCCTTCCCTTCCCTG	PASS	downstream_gene_variant	MODIFIER	SRCIN1	491037	transcript	XM_022423040.1	protein_coding	-1	c.*3956_*3957insCCCTTCCCTTCCCTTCCCTG
9	23663196	T	TCCCTTCCCTTCCCTTCCCTG	PASS	downstream_gene_variant	MODIFIER	SRCIN1	491037	transcript	XM_022423044.1	protein_coding	-1	c.*3956_*3957insCCCTTCCCTTCCCTTCCCTG
9	23663196	T	TCCCTTCCCTTCCCTTCCCTG	PASS	downstream_gene_variant	MODIFIER	SRCIN1	491037	transcript	XM_022423046.1	protein_coding	-1	c.*3956_*3957insCCCTTCCCTTCCCTTCCCTG
9	23663196	T	TCCCTTCCCTTCCCTTCCCTG	PASS	downstream_gene_variant	MODIFIER	SRCIN1	491037	transcript	XM_022423047.1	protein_coding	-1	c.*3956_*3957insCCCTTCCCTTCCCTTCCCTG
9	23663196	T	TCCCTTCCCTTCCCTTCCCTG	PASS	downstream_gene_variant	MODIFIER	SRCIN1	491037	transcript	XM_022423048.1	protein_coding	-1	c.*3956_*3957insCCCTTCCCTTCCCTTCCCTG
9	23663196	T	TCCCTTCCCTTCCCTTCCCTG	PASS	downstream_gene_variant	MODIFIER	SRCIN1	491037	transcript	XM_022423049.1	protein_coding	-1	c.*3956_*3957insCCCTTCCCTTCCCTTCCCTG
9	23663196	T	TCCCTTCCCTTCCCTTCCCTG	PASS	intron_variant	MODIFIER	SRCIN1	491037	transcript	XM_022423041.1	protein_coding	22	c.4435-1201_4435-1200insCCCTTCCCTTCCCTTCCCTG
9	23663196	T	TCCCTTCCCTTCCCTTCCCTG	PASS	intron_variant	MODIFIER	SRCIN1	491037	transcript	XM_014116613.2	protein_coding	21	c.3850-1201_3850-1200insCCCTTCCCTTCCCTTCCCTG
9	23663196	T	TCCCTTCCCTTCCCTTCCCTG	PASS	intron_variant	MODIFIER	SRCIN1	491037	transcript	XM_014116614.2	protein_coding	20	c.3727-1201_3727-1200insCCCTTCCCTTCCCTTCCCTG
9	23663196	T	TCCCTTCCCTTCCCTTCCCTG	PASS	intron_variant	MODIFIER	SRCIN1	491037	transcript	XM_014116615.2	protein_coding	19	c.3625-1201_3625-1200insCCCTTCCCTTCCCTTCCCTG
9	55123321	G	A	GATKstd	upstream_gene_variant	MODIFIER	CERCAM	609012	transcript	XM_014117017.2	protein_coding	-1	c.-3312C>T
9	55123321	G	A	GATKstd	upstream_gene_variant	MODIFIER	CERCAM	609012	transcript	XM_014117018.2	protein_coding	-1	c.-4935C>T
9	55123321	G	A	GATKstd	upstream_gene_variant	MODIFIER	CERCAM	609012	transcript	XM_846190.5	protein_coding	-1	c.-3312C>T
9	55123321	G	A	GATKstd	intron_variant	MODIFIER	LOC102156797	102156797	transcript	XM_022423941.1	protein_coding	3	c.409-2602C>T
9	55123325	A	G	GATKstd	upstream_gene_variant	MODIFIER	CERCAM	609012	transcript	XM_014117017.2	protein_coding	-1	c.-3316T>C
9	55123325	A	G	GATKstd	upstream_gene_variant	MODIFIER	CERCAM	609012	transcript	XM_014117018.2	protein_coding	-1	c.-4939T>C
9	55123325	A	G	GATKstd	upstream_gene_variant	MODIFIER	CERCAM	609012	transcript	XM_846190.5	protein_coding	-1	c.-3316T>C
9	55123325	A	G	GATKstd	intron_variant	MODIFIER	LOC102156797	102156797	transcript	XM_022423941.1	protein_coding	3	c.409-2606T>C
9	55123330	C	G	GATKstd	upstream_gene_variant	MODIFIER	CERCAM	609012	transcript	XM_014117017.2	protein_coding	-1	c.-3321G>C
9	55123330	C	G	GATKstd	upstream_gene_variant	MODIFIER	CERCAM	609012	transcript	XM_014117018.2	protein_coding	-1	c.-4944G>C
9	55123330	C	G	GATKstd	upstream_gene_variant	MODIFIER	CERCAM	609012	transcript	XM_846190.5	protein_coding	-1	c.-3321G>C
9	55123330	C	G	GATKstd	intron_variant	MODIFIER	LOC102156797	102156797	transcript	XM_022423941.1	protein_coding	3	c.409-2611G>C
9	59392131	A	T	GATKstd	intron_variant	MODIFIER	DENND1A	609706	transcript	XM_022423856.1	protein_coding	20	c.1732-5392A>T
9	59392131	A	T	GATKstd	intron_variant	MODIFIER	DENND1A	609706	transcript	XM_022423858.1	protein_coding	20	c.1645-5392A>T
9	59392131	A	T	GATKstd	intron_variant	MODIFIER	DENND1A	609706	transcript	XM_014117075.2	protein_coding	19	c.1609-5392A>T
9	59392131	A	T	GATKstd	intron_variant	MODIFIER	DENND1A	609706	transcript	XM_022423857.1	protein_coding	20	c.1732-12400A>T
9	59392131	A	T	GATKstd	intron_variant	MODIFIER	DENND1A	609706	transcript	XM_022423859.1	protein_coding	20	c.1732-5392A>T
9	59392131	A	T	GATKstd	intron_variant	MODIFIER	DENND1A	609706	transcript	XM_022423861.1	protein_coding	19	c.1576-5392A>T
9	59392131	A	T	GATKstd	intron_variant	MODIFIER	DENND1A	609706	transcript	XM_022423862.1	protein_coding	19	c.1570-5392A>T
9	59392131	A	T	GATKstd	intron_variant	MODIFIER	DENND1A	609706	transcript	XM_005625388.3	protein_coding	19	c.1609-12400A>T
9	59392131	A	T	GATKstd	intron_variant	MODIFIER	DENND1A	609706	transcript	XM_022423863.1	protein_coding	20	c.1732-12400A>T
9	59392131	A	T	GATKstd	intron_variant	MODIFIER	DENND1A	609706	transcript	XM_005625389.3	protein_coding	19	c.1609-12400A>T
9	59392131	A	T	GATKstd	intron_variant	MODIFIER	DENND1A	609706	transcript	XM_022423860.1	protein_coding	20	c.1591-5392A>T
9	59392131	A	T	GATKstd	intron_variant	MODIFIER	DENND1A	609706	transcript	XM_022423865.1	protein_coding	19	c.1516-5392A>T
9	59392131	A	T	GATKstd	intron_variant	MODIFIER	DENND1A	609706	transcript	XM_022423864.1	protein_coding	19	c.1540-5392A>T
9	59392131	A	T	GATKstd	intron_variant	MODIFIER	DENND1A	609706	transcript	XM_022423866.1	protein_coding	12	c.1009-5392A>T
9	59392132	T	C	GATKstd	intron_variant	MODIFIER	DENND1A	609706	transcript	XM_022423856.1	protein_coding	20	c.1732-5391T>C
9	59392132	T	C	GATKstd	intron_variant	MODIFIER	DENND1A	609706	transcript	XM_022423858.1	protein_coding	20	c.1645-5391T>C
9	59392132	T	C	GATKstd	intron_variant	MODIFIER	DENND1A	609706	transcript	XM_014117075.2	protein_coding	19	c.1609-5391T>C
9	59392132	T	C	GATKstd	intron_variant	MODIFIER	DENND1A	609706	transcript	XM_022423857.1	protein_coding	20	c.1732-12399T>C
9	59392132	T	C	GATKstd	intron_variant	MODIFIER	DENND1A	609706	transcript	XM_022423859.1	protein_coding	20	c.1732-5391T>C
9	59392132	T	C	GATKstd	intron_variant	MODIFIER	DENND1A	609706	transcript	XM_022423861.1	protein_coding	19	c.1576-5391T>C
9	59392132	T	C	GATKstd	intron_variant	MODIFIER	DENND1A	609706	transcript	XM_022423862.1	protein_coding	19	c.1570-5391T>C
9	59392132	T	C	GATKstd	intron_variant	MODIFIER	DENND1A	609706	transcript	XM_005625388.3	protein_coding	19	c.1609-12399T>C
9	59392132	T	C	GATKstd	intron_variant	MODIFIER	DENND1A	609706	transcript	XM_022423863.1	protein_coding	20	c.1732-12399T>C
9	59392132	T	C	GATKstd	intron_variant	MODIFIER	DENND1A	609706	transcript	XM_005625389.3	protein_coding	19	c.1609-12399T>C
9	59392132	T	C	GATKstd	intron_variant	MODIFIER	DENND1A	609706	transcript	XM_022423860.1	protein_coding	20	c.1591-5391T>C
9	59392132	T	C	GATKstd	intron_variant	MODIFIER	DENND1A	609706	transcript	XM_022423865.1	protein_coding	19	c.1516-5391T>C
9	59392132	T	C	GATKstd	intron_variant	MODIFIER	DENND1A	609706	transcript	XM_022423864.1	protein_coding	19	c.1540-5391T>C
9	59392132	T	C	GATKstd	intron_variant	MODIFIER	DENND1A	609706	transcript	XM_022423866.1	protein_coding	12	c.1009-5391T>C
AAEX03018827.1	187033	C	G	GATKstd	intergenic_region	MODIFIER						-1
AAEX03019222.1	109122	T	TCACCCG	PASS	intergenic_region	MODIFIER						-1
AAEX03019340.1	93699	T	G	GATKstd	intergenic_region	MODIFIER						-1
AAEX03019340.1	93718	A	T	GATKstd	intergenic_region	MODIFIER						-1
AAEX03019340.1	93721	T	C	GATKstd	intergenic_region	MODIFIER						-1
AAEX03019340.1	103570	A	G	GATKstd	intergenic_region	MODIFIER						-1
AAEX03019340.1	103573	A	T	GATKstd	intergenic_region	MODIFIER						-1
AAEX03019443.1	5590	GA	G	PASS	intergenic_region	MODIFIER						-1
AAEX03019681.1	6417	C	T	GATKstd	intergenic_region	MODIFIER						-1
AAEX03020487.1	40203	G	T	GATKstd	intergenic_region	MODIFIER						-1
AAEX03020729.1	29257	T	G	GATKstd	intergenic_region	MODIFIER						-1
AAEX03021041.1	5530	G	C	GATKstd	intergenic_region	MODIFIER						-1
AAEX03021372.1	22878	G	T	GATKstd	intergenic_region	MODIFIER						-1
AAEX03021372.1	22879	A	T	GATKstd	intergenic_region	MODIFIER						-1
AAEX03021372.1	22888	G	A	GATKstd	intergenic_region	MODIFIER						-1
AAEX03021372.1	22899	G	T	GATKstd	intergenic_region	MODIFIER						-1
AAEX03021372.1	22900	A	C	GATKstd	intergenic_region	MODIFIER						-1
AAEX03021372.1	22906	G	A	GATKstd	intergenic_region	MODIFIER						-1
AAEX03021372.1	22907	T	A	GATKstd	intergenic_region	MODIFIER						-1
AAEX03021372.1	22908	C	T	GATKstd	intergenic_region	MODIFIER						-1
AAEX03021372.1	22913	A	T	GATKstd	intergenic_region	MODIFIER						-1
AAEX03021372.1	22923	A	G	GATKstd	intergenic_region	MODIFIER						-1
AAEX03021841.1	596	G	T	GATKstd	intergenic_region	MODIFIER						-1
AAEX03021871.1	13499	T	G	GATKstd	intergenic_region	MODIFIER						-1
AAEX03022032.1	4342	T	G	GATKstd	intergenic_region	MODIFIER						-1
AAEX03022093.1	7159	G	A	GATKstd	intergenic_region	MODIFIER						-1
AAEX03022256.1	16171	A	G	GATKstd	intergenic_region	MODIFIER						-1
AAEX03022262.1	16541	A	G	GATKstd	intergenic_region	MODIFIER						-1
AAEX03022300.1	2584	T	A	GATKstd	intergenic_region	MODIFIER						-1
AAEX03022348.1	2431	A	T	GATKstd	intergenic_region	MODIFIER						-1
AAEX03022348.1	2445	A	T	GATKstd	intergenic_region	MODIFIER						-1
AAEX03022358.1	12685	A	G	GATKstd	intergenic_region	MODIFIER						-1
AAEX03022448.1	6930	G	C	GATKstd	intergenic_region	MODIFIER						-1
AAEX03022448.1	6933	G	T	PASS	intergenic_region	MODIFIER						-1
AAEX03022448.1	10209	G	A	GATKstd	intergenic_region	MODIFIER						-1
AAEX03022448.1	10210	A	T	GATKstd	intergenic_region	MODIFIER						-1
AAEX03022592.1	5616	C	G	PASS	intergenic_region	MODIFIER						-1
AAEX03022624.1	7044	T	C	GATKstd	intergenic_region	MODIFIER						-1
AAEX03022651.1	15779	C	A	GATKstd	intergenic_region	MODIFIER						-1
AAEX03022741.1	6609	G	T	GATKstd	intergenic_region	MODIFIER						-1
AAEX03022741.1	6625	G	A	GATKstd	intergenic_region	MODIFIER						-1
AAEX03022760.1	15537	G	T	GATKstd	intergenic_region	MODIFIER						-1
AAEX03022778.1	1343	G	T	GATKstd	intergenic_region	MODIFIER						-1
AAEX03022941.1	7144	C	G	GATKstd	intergenic_region	MODIFIER						-1
AAEX03022941.1	7147	T	A	GATKstd	intergenic_region	MODIFIER						-1
AAEX03023108.1	12149	A	G	GATKstd	intergenic_region	MODIFIER						-1
[truncated: 377 more rows]

## Sheet: private heterozygous variants
Table S2. Private variants in the sequenced Rottweiler with footpad hyperkeratosis. Private variants were obtained by filtering all variants that were present at least once in 655 control genomes. This resulted in 842 homozygous and 3290 heterozygous private variants for the affected dog. Please note that variants are listed multiple times, if they have predicted effects on more than one transcri…
#CHROM	POS	REF	ALT	FILTER	EFFECT	IMPACT	GENE	GENEID	FEATURE	FEATUREID	BIOTYPE	RANK	HGVS_C	HGVS_P
10	4606531	C	T	PASS	intergenic_region	MODIFIER	LOC106559344-LOC111097816	106559344-111097816	intergenic_region	106559344-111097816		-1	n.4606531C>T
10	4741912	T	TA	PASS	intergenic_region	MODIFIER	LOC106559344-LOC111097816	106559344-111097816	intergenic_region	106559344-111097816		-1	n.4741912_4741913insA
10	4871280	C	T	PASS	intergenic_region	MODIFIER	LOC111097816-FAM19A2	111097816-607990	intergenic_region	111097816-607990		-1	n.4871280C>T
10	4884759	A	G	PASS	intergenic_region	MODIFIER	LOC111097816-FAM19A2	111097816-607990	intergenic_region	111097816-607990		-1	n.4884759A>G
10	4919219	C	CT	PASS	intergenic_region	MODIFIER	LOC111097816-FAM19A2	111097816-607990	intergenic_region	111097816-607990		-1	n.4919219_4919220insT
10	4939906	A	G	PASS	intergenic_region	MODIFIER	LOC111097816-FAM19A2	111097816-607990	intergenic_region	111097816-607990		-1	n.4939906A>G
10	5001751	T	G	PASS	intron_variant	MODIFIER	FAM19A2	607990	transcript	XM_005625568.2	protein_coding	3	c.385-1045A>C
10	5081197	C	T	PASS	intron_variant	MODIFIER	FAM19A2	607990	transcript	XM_005625568.2	protein_coding	1	c.107-44201G>A
10	5095883	T	A	PASS	intron_variant	MODIFIER	FAM19A2	607990	transcript	XM_005625568.2	protein_coding	1	c.106+38982A>T
10	5235255	C	T	PASS	intergenic_region	MODIFIER	FAM19A2-USP15	607990-474424	intergenic_region	607990-474424		-1	n.5235255C>T
10	5244193	G	GGCAGATGTTCAA	PASS	intergenic_region	MODIFIER	FAM19A2-USP15	607990-474424	intergenic_region	607990-474424		-1	n.5244193_5244194insGCAGATGTTCAA
10	5409251	C	T	PASS	intergenic_region	MODIFIER	FAM19A2-USP15	607990-474424	intergenic_region	607990-474424		-1	n.5409251C>T
10	5465246	A	C	PASS	intergenic_region	MODIFIER	FAM19A2-USP15	607990-474424	intergenic_region	607990-474424		-1	n.5465246A>C
10	5530480	G	A	GATKstd	intron_variant	MODIFIER	USP15	474424	transcript	XM_844842.5	protein_coding	1	c.90-2265G>A
10	5530480	G	A	GATKstd	intron_variant	MODIFIER	USP15	474424	transcript	XR_002630398.1	pseudogene	1	n.148-2265G>A
10	5530480	G	A	GATKstd	intron_variant	MODIFIER	USP15	474424	transcript	XR_002630399.1	pseudogene	1	n.148-2265G>A
10	5530480	G	A	GATKstd	intron_variant	MODIFIER	USP15	474424	transcript	XR_002630400.1	pseudogene	1	n.148-2265G>A
10	5530480	G	A	GATKstd	intron_variant	MODIFIER	USP15	474424	transcript	XM_022424124.1	protein_coding	1	c.90-2265G>A
10	5530480	G	A	GATKstd	intron_variant	MODIFIER	USP15	474424	transcript	XM_855384.4	protein_coding	1	c.90-2265G>A
10	5597769	T	C	GATKstd	intron_variant	MODIFIER	USP15	474424	transcript	XM_844842.5	protein_coding	8	c.915+6579T>C
10	5597769	T	C	GATKstd	intron_variant	MODIFIER	LOC111097580	111097580	transcript	XR_002630402.1	pseudogene	3	n.479+1679A>G
10	5597769	T	C	GATKstd	intron_variant	MODIFIER	USP15	474424	transcript	XR_002630398.1	pseudogene	8	n.973+6579T>C
10	5597769	T	C	GATKstd	intron_variant	MODIFIER	USP15	474424	transcript	XR_002630399.1	pseudogene	9	n.1073+2075T>C
10	5597769	T	C	GATKstd	intron_variant	MODIFIER	USP15	474424	transcript	XR_002630400.1	pseudogene	9	n.1073+2075T>C
10	5597769	T	C	GATKstd	intron_variant	MODIFIER	USP15	474424	transcript	XM_022424124.1	protein_coding	8	c.915+6579T>C
10	5597769	T	C	GATKstd	intron_variant	MODIFIER	USP15	474424	transcript	XM_855384.4	protein_coding	7	c.828+6579T>C
10	5597769	T	C	GATKstd	intron_variant	MODIFIER	USP15	474424	transcript	XM_005625570.3	protein_coding	6	c.552+6579T>C
10	5597769	T	C	GATKstd	intron_variant	MODIFIER	USP15	474424	transcript	XM_022424125.1	protein_coding	2	c.246+6579T>C
10	5597769	T	C	GATKstd	intron_variant	MODIFIER	USP15	474424	transcript	XM_022424126.1	protein_coding	3	c.87+2075T>C
10	5597769	T	C	GATKstd	intron_variant	MODIFIER	USP15	474424	transcript	XM_022424127.1	protein_coding	2	c.18+6579T>C
10	5597769	T	C	GATKstd	intron_variant	MODIFIER	USP15	474424	transcript	XM_022424128.1	protein_coding	2	c.-231+6579T>C
10	5597769	T	C	GATKstd	intron_variant	MODIFIER	USP15	474424	transcript	XM_022424129.1	protein_coding	2	c.-231+6579T>C
10	5597769	T	C	GATKstd	intron_variant	MODIFIER	USP15	474424	transcript	XM_022424131.1	protein_coding	1	c.-231+2075T>C
10	5994891	C	T	GATKstd	intron_variant	MODIFIER	PPM1H	474425	transcript	XM_531656.6	protein_coding	1	c.243-19418G>A
10	5994891	C	T	GATKstd	intron_variant	MODIFIER	PPM1H	474425	transcript	XM_022424135.1	protein_coding	1	c.2+5704G>A
10	5994891	C	T	GATKstd	intron_variant	MODIFIER	PPM1H	474425	transcript	XM_022424134.1	protein_coding	1	c.243-19418G>A
10	5994891	C	T	GATKstd	intron_variant	MODIFIER	PPM1H	474425	transcript	XM_022424133.1	protein_coding	1	c.243-19418G>A
10	13356537	T	G	GATKstd	upstream_gene_variant	MODIFIER	TBC1D15	474451	transcript	XM_531681.6	protein_coding	-1	c.-1087T>G
10	13356537	T	G	GATKstd	upstream_gene_variant	MODIFIER	TBC1D15	474451	transcript	XM_003431455.4	protein_coding	-1	c.-1087T>G
10	13356537	T	G	GATKstd	intergenic_region	MODIFIER	LOC111097600-TBC1D15	111097600-474451	intergenic_region	111097600-474451		-1	n.13356537T>G
10	16110862	T	A	GATKstd	intergenic_region	MODIFIER	LOC100856690-LOC102154175	100856690-102154175	intergenic_region	100856690-102154175		-1	n.16110862T>A
10	18590100	G	A	GATKstd	intergenic_region	MODIFIER	LOC100686419-LOC102154327	100686419-102154327	intergenic_region	100686419-102154327		-1	n.18590100G>A
10	18834652	G	A	GATKstd	intergenic_region	MODIFIER	LOC100686419-LOC102154327	100686419-102154327	intergenic_region	100686419-102154327		-1	n.18834652G>A
10	19534329	TAGAA	T	PASS	upstream_gene_variant	MODIFIER	TBC1D22A	474462	transcript	XM_843497.4	protein_coding	-1	c.-2392_-2389delTTCT
10	19534329	TAGAA	T	PASS	upstream_gene_variant	MODIFIER	TBC1D22A	474462	transcript	XM_005625744.2	protein_coding	-1	c.-2392_-2389delTTCT
10	19534329	TAGAA	T	PASS	upstream_gene_variant	MODIFIER	TBC1D22A	474462	transcript	XM_022424283.1	protein_coding	-1	c.-2392_-2389delTTCT
10	19534329	TAGAA	T	PASS	downstream_gene_variant	MODIFIER	LOC111097614	111097614	transcript	XR_002630510.1	pseudogene	-1	n.*816_*819delAGAA
10	19534329	TAGAA	T	PASS	intergenic_region	MODIFIER	LOC111097614-CERK	111097614-474464	intergenic_region	111097614-474464		-1	n.19534330_19534333delAGAA
10	19564697	C	T	GATKstd	intron_variant	MODIFIER	CERK	474464	transcript	XM_022424294.1	protein_coding	1	c.171+4402C>T
10	19999548	G	GC	PASS	intron_variant	MODIFIER	PPARA	403654	transcript	XM_005625674.2	protein_coding	1	c.-289+6349_-289+6350insG
10	19999548	G	GC	PASS	intron_variant	MODIFIER	PPARA	403654	transcript	XM_022423980.1	protein_coding	1	c.-289+6349_-289+6350insG
10	19999548	G	GC	PASS	intron_variant	MODIFIER	PPARA	403654	transcript	XR_002630373.1	pseudogene	1	n.126+6349_126+6350insG
10	19999548	G	GC	PASS	intron_variant	MODIFIER	PPARA	403654	transcript	XR_002630372.1	pseudogene	1	n.126+6349_126+6350insG
10	19999548	G	GC	PASS	intron_variant	MODIFIER	PPARA	403654	transcript	XR_002630371.1	pseudogene	1	n.73+6349_73+6350insG
10	19999548	G	GC	PASS	intron_variant	MODIFIER	PPARA	403654	transcript	XR_002630375.1	pseudogene	1	n.114+6349_114+6350insG
10	19999548	G	GC	PASS	intron_variant	MODIFIER	PPARA	403654	transcript	XR_002630374.1	pseudogene	1	n.126+6349_126+6350insG
10	19999548	G	GC	PASS	intron_variant	MODIFIER	PPARA	403654	transcript	XR_293305.2	pseudogene	1	n.126+6349_126+6350insG
10	19999548	G	GC	PASS	intron_variant	MODIFIER	PPARA	403654	transcript	XR_002630376.1	pseudogene	1	n.198+6349_198+6350insG
10	19999548	G	GC	PASS	intron_variant	MODIFIER	PPARA	403654	transcript	NM_001003093.1	protein_coding	1	c.-40+6349_-40+6350insG
10	20061104	G	A	PASS	non_coding_transcript_exon_variant	MODIFIER	LOC111097617	111097617	transcript	XR_002630512.1	pseudogene	2	n.5968G>A
10	20211958	C	T	GATKstd	downstream_gene_variant	MODIFIER	WNT7B	481206	transcript	XM_022424288.1	protein_coding	-1	c.*3312C>T
10	20211958	C	T	GATKstd	downstream_gene_variant	MODIFIER	WNT7B	481206	transcript	XM_538327.6	protein_coding	-1	c.*3742C>T
10	20211958	C	T	GATKstd	downstream_gene_variant	MODIFIER	WNT7B	481206	transcript	XM_005625749.2	protein_coding	-1	c.*3742C>T
10	20211958	C	T	GATKstd	downstream_gene_variant	MODIFIER	WNT7B	481206	transcript	XM_022424289.1	protein_coding	-1	c.*3312C>T
10	20211958	C	T	GATKstd	intergenic_region	MODIFIER	WNT7B-LOC102152393	481206-102152393	intergenic_region	481206-102152393		-1	n.20211958C>T
10	20612008	G	A	GATKstd	intergenic_region	MODIFIER	FBLN1-RIBC2	474468-474469	intergenic_region	474468-474469		-1	n.20612008G>A
10	20797292	G	A	GATKstd	intron_variant	MODIFIER	KIAA0930	481210	transcript	XM_022424321.1	protein_coding	1	c.64+10825G>A
10	20797292	G	A	GATKstd	intron_variant	MODIFIER	KIAA0930	481210	transcript	XM_005625757.3	protein_coding	1	c.64+10825G>A
10	20797292	G	A	GATKstd	intron_variant	MODIFIER	KIAA0930	481210	transcript	XR_002630515.1	pseudogene	1	n.140+10825G>A
10	20797292	G	A	GATKstd	intron_variant	MODIFIER	KIAA0930	481210	transcript	XM_014117290.2	protein_coding	2	c.121+2445G>A
10	21224256	C	T	PASS	intergenic_region	MODIFIER	PRR5-RTL6	100533463-481213	intergenic_region	100533463-481213		-1	n.21224256C>T
10	24529140	T	A	GATKstd	5_prime_UTR_premature_start_codon_gain_variant	LOW	MCHR1	403563	transcript	XM_005625673.3	protein_coding	1	c.-525A>T
10	24529140	T	A	GATKstd	5_prime_UTR_variant	MODIFIER	MCHR1	403563	transcript	XM_005625673.3	protein_coding	1	c.-525A>T
10	24529140	T	A	GATKstd	intron_variant	MODIFIER	MCHR1	403563	transcript	XM_005625672.3	protein_coding	2	c.107-584A>T
10	24529140	T	A	GATKstd	intron_variant	MODIFIER	MCHR1	403563	transcript	XM_022423977.1	protein_coding	3	c.-44-584A>T
10	24529140	T	A	GATKstd	intron_variant	MODIFIER	MCHR1	403563	transcript	XM_022423978.1	protein_coding	1	c.-44-584A>T
10	24529140	T	A	GATKstd	intron_variant	MODIFIER	MCHR1	403563	transcript	NM_001003038.1	protein_coding	1	c.83-584A>T
10	24529165	T	A	GATKstd	5_prime_UTR_premature_start_codon_gain_variant	LOW	MCHR1	403563	transcript	XM_005625673.3	protein_coding	1	c.-550A>T
10	24529165	T	A	GATKstd	5_prime_UTR_variant	MODIFIER	MCHR1	403563	transcript	XM_005625673.3	protein_coding	1	c.-550A>T
10	24529165	T	A	GATKstd	intron_variant	MODIFIER	MCHR1	403563	transcript	XM_005625672.3	protein_coding	2	c.107-609A>T
10	24529165	T	A	GATKstd	intron_variant	MODIFIER	MCHR1	403563	transcript	XM_022423977.1	protein_coding	3	c.-44-609A>T
10	24529165	T	A	GATKstd	intron_variant	MODIFIER	MCHR1	403563	transcript	XM_022423978.1	protein_coding	1	c.-44-609A>T
10	24529165	T	A	GATKstd	intron_variant	MODIFIER	MCHR1	403563	transcript	NM_001003038.1	protein_coding	1	c.83-609A>T
10	27439006	T	TG	PASS	downstream_gene_variant	MODIFIER	TMPRSS6	608593	transcript	XM_022424473.1	protein_coding	-1	c.*3649_*3650insG
10	27439006	T	TG	PASS	downstream_gene_variant	MODIFIER	KCTD17	481274	transcript	XM_022424307.1	protein_coding	-1	c.*273_*274insC
10	27439006	T	TG	PASS	downstream_gene_variant	MODIFIER	TMPRSS6	608593	transcript	XM_845457.4	protein_coding	-1	c.*3649_*3650insG
10	27439006	T	TG	PASS	downstream_gene_variant	MODIFIER	TMPRSS6	608593	transcript	XM_014117371.2	protein_coding	-1	c.*3649_*3650insG
10	27439006	T	TG	PASS	intergenic_region	MODIFIER	TMPRSS6-KCTD17	608593-481274	intergenic_region	608593-481274		-1	n.27439006_27439007insG
10	27863010	G	C	GATKstd	upstream_gene_variant	MODIFIER	MIR8827	104794970	transcript	NR_128770.1	pseudogene	-1	n.-2045C>G
10	27863010	G	C	GATKstd	upstream_gene_variant	MODIFIER	MIR8827	104794970	transcript	TRANSCRIPT_104794970	pseudogene	-1	n.-2085C>G
10	27863010	G	C	GATKstd	downstream_gene_variant	MODIFIER	CACNG2	481279	transcript	XM_538400.6	protein_coding	-1	c.*530G>C
10	27863010	G	C	GATKstd	intergenic_region	MODIFIER	CACNG2-EIF3D	481279-608665	intergenic_region	481279-608665		-1	n.27863010G>C
10	28457384	A	T	GATKstd	intron_variant	MODIFIER	RBFOX2	481281	transcript	XM_005625913.3	protein_coding	5	c.516+176A>T
10	28457384	A	T	GATKstd	intron_variant	MODIFIER	RBFOX2	481281	transcript	XM_022424490.1	protein_coding	5	c.516+176A>T
10	28457384	A	T	GATKstd	intron_variant	MODIFIER	RBFOX2	481281	transcript	XM_022424491.1	protein_coding	5	c.516+176A>T
10	28457384	A	T	GATKstd	intron_variant	MODIFIER	RBFOX2	481281	transcript	XM_022424487.1	protein_coding	5	c.516+176A>T
10	28457384	A	T	GATKstd	intron_variant	MODIFIER	RBFOX2	481281	transcript	XM_014117381.2	protein_coding	5	c.516+176A>T
10	28457384	A	T	GATKstd	intron_variant	MODIFIER	RBFOX2	481281	transcript	XM_005625914.3	protein_coding	5	c.516+176A>T
10	28457384	A	T	GATKstd	intron_variant	MODIFIER	RBFOX2	481281	transcript	XM_005625915.3	protein_coding	5	c.516+176A>T
10	28457384	A	T	GATKstd	intron_variant	MODIFIER	RBFOX2	481281	transcript	XM_005625916.3	protein_coding	5	c.516+176A>T
10	28457384	A	T	GATKstd	intron_variant	MODIFIER	RBFOX2	481281	transcript	XM_014117377.2	protein_coding	5	c.516+176A>T
10	28457384	A	T	GATKstd	intron_variant	MODIFIER	RBFOX2	481281	transcript	XM_014117378.2	protein_coding	5	c.516+176A>T
10	28457384	A	T	GATKstd	intron_variant	MODIFIER	RBFOX2	481281	transcript	XM_022424483.1	protein_coding	5	c.516+176A>T
10	28457384	A	T	GATKstd	intron_variant	MODIFIER	RBFOX2	481281	transcript	XM_022424485.1	protein_coding	5	c.516+176A>T
10	28457384	A	T	GATKstd	intron_variant	MODIFIER	RBFOX2	481281	transcript	XM_022424489.1	protein_coding	5	c.516+176A>T
10	28457384	A	T	GATKstd	intron_variant	MODIFIER	RBFOX2	481281	transcript	XM_022424488.1	protein_coding	4	c.438+176A>T
10	28457384	A	T	GATKstd	intron_variant	MODIFIER	RBFOX2	481281	transcript	XM_022424484.1	protein_coding	4	c.468+176A>T
10	28457384	A	T	GATKstd	intron_variant	MODIFIER	RBFOX2	481281	transcript	XM_022424486.1	protein_coding	4	c.450+176A>T
10	28751672	TGGGTGCTGC	T	PASS	upstream_gene_variant	MODIFIER	HMOX1	442987	transcript	NM_001194969.1	protein_coding	-1	c.-137_-129delGCAGCACCC
10	28751672	TGGGTGCTGC	T	PASS	intergenic_region	MODIFIER	HMOX1-TOM1	442987-608746	intergenic_region	442987-608746		-1	n.28751673_28751681delGGGTGCTGC
10	29004847	A	ATTTTTTTTTTTTTTTTTTTTTTTTTTTTTTTTATTGGTGTTC	PASS	intron_variant	MODIFIER	ISX	610571	transcript	XM_848103.3	protein_coding	1	c.193+6565_193+6566insGAACACCAATAAAAAAAAAAAAAAAAAAAAAAAAAAAAAAAA
10	30241114	G	A	GATKstd	intron_variant	MODIFIER	LARGE1	474521	transcript	XM_005625925.3	protein_coding	6	c.788-39369G>A
10	30241114	G	A	GATKstd	intron_variant	MODIFIER	LARGE1	474521	transcript	XM_531751.6	protein_coding	6	c.788-39369G>A
10	30241114	G	A	GATKstd	intron_variant	MODIFIER	LARGE1	474521	transcript	XM_022424499.1	protein_coding	6	c.788-39369G>A
10	31219504	G	A	GATKstd	intron_variant	MODIFIER	BTBD11	481292	transcript	XM_845849.5	protein_coding	4	c.1650-531C>T
10	31219504	G	A	GATKstd	intron_variant	MODIFIER	BTBD11	481292	transcript	XM_538413.6	protein_coding	2	c.279-531C>T
10	31219504	G	A	GATKstd	intron_variant	MODIFIER	BTBD11	481292	transcript	XM_014117388.2	protein_coding	4	c.1650-531C>T
10	31219504	G	A	GATKstd	intron_variant	MODIFIER	BTBD11	481292	transcript	XM_022424512.1	protein_coding	4	c.1650-531C>T
10	31219504	G	A	GATKstd	intron_variant	MODIFIER	BTBD11	481292	transcript	XM_014117389.2	protein_coding	4	c.1650-531C>T
10	31219504	G	A	GATKstd	intron_variant	MODIFIER	BTBD11	481292	transcript	XM_022424511.1	protein_coding	4	c.1650-531C>T
10	31872536	TTTC	T	PASS	intron_variant	MODIFIER	LOC111097674	111097674	transcript	XR_002630648.1	pseudogene	1	n.566-1147_566-1145delGAA
10	31872545	TTC	T	PASS	intron_variant	MODIFIER	LOC111097674	111097674	transcript	XR_002630648.1	pseudogene	1	n.566-1155_566-1154delGA
10	35448866	C	CTTTTTTTTTTT	PASS	intron_variant	MODIFIER	LOC111097683	111097683	transcript	XR_002630668.1	pseudogene	1	n.844+16511_844+16512insTTTTTTTTTTT
10	35448866	C	CTTTTTTTTTTT	PASS	intron_variant	MODIFIER	LOC111097683	111097683	transcript	XR_002630669.1	pseudogene	1	n.844+16511_844+16512insTTTTTTTTTTT
10	35448872	A	G	GATKstd	intron_variant	MODIFIER	LOC111097683	111097683	transcript	XR_002630668.1	pseudogene	1	n.844+16517A>G
10	35448872	A	G	GATKstd	intron_variant	MODIFIER	LOC111097683	111097683	transcript	XR_002630669.1	pseudogene	1	n.844+16517A>G
10	35448874	A	G	PASS	intron_variant	MODIFIER	LOC111097683	111097683	transcript	XR_002630668.1	pseudogene	1	n.844+16519A>G
10	35448874	A	G	PASS	intron_variant	MODIFIER	LOC111097683	111097683	transcript	XR_002630669.1	pseudogene	1	n.844+16519A>G
10	38335679	T	A	PASS	intron_variant	MODIFIER	MRPS9	474545	transcript	XM_531774.6	protein_coding	4	c.409+592A>T
10	39599043	A	G	GATKstd	upstream_gene_variant	MODIFIER	LOC481325	481325	transcript	481325	pseudogene	-1	n.-3560A>G
10	39599043	A	G	GATKstd	intergenic_region	MODIFIER	LOC102156237-LOC481325	102156237-481325	intergenic_region	102156237-481325		-1	n.39599043A>G
10	41528117	A	AGAGAGAGAGAGGC	PASS	intergenic_region	MODIFIER	LOC111097704-CREG2	111097704-611525	intergenic_region	111097704-611525		-1	n.41528117_41528118insGAGAGAGAGAGGC
10	43245378	A	T	GATKstd	downstream_gene_variant	MODIFIER	EIF5B	474556	transcript	XM_005626021.3	protein_coding	-1	c.*3477T>A
10	43245378	A	T	GATKstd	downstream_gene_variant	MODIFIER	EIF5B	474556	transcript	XM_005626023.3	protein_coding	-1	c.*3477T>A
10	43245378	A	T	GATKstd	downstream_gene_variant	MODIFIER	EIF5B	474556	transcript	XM_005626022.3	protein_coding	-1	c.*3477T>A
10	43245378	A	T	GATKstd	intron_variant	MODIFIER	REV1	481337	transcript	XM_538458.6	protein_coding	19	c.3170-312A>T
10	43245378	A	T	GATKstd	intron_variant	MODIFIER	REV1	481337	transcript	XM_022424588.1	protein_coding	18	c.3170-312A>T
10	43245378	A	T	GATKstd	intron_variant	MODIFIER	REV1	481337	transcript	XM_014117470.2	protein_coding	18	c.3167-312A>T
10	43245378	A	T	GATKstd	intron_variant	MODIFIER	REV1	481337	transcript	XM_005626018.2	protein_coding	18	c.2960-312A>T
10	43245378	A	T	GATKstd	intron_variant	MODIFIER	REV1	481337	transcript	XM_005626019.2	protein_coding	18	c.2960-312A>T
10	43245378	A	T	GATKstd	intron_variant	MODIFIER	REV1	481337	transcript	XM_022424589.1	protein_coding	14	c.1952-312A>T
10	43245378	A	T	GATKstd	intron_variant	MODIFIER	REV1	481337	transcript	XM_022424591.1	protein_coding	12	c.1712-312A>T
10	43245378	A	T	GATKstd	intron_variant	MODIFIER	REV1	481337	transcript	XM_022424590.1	protein_coding	12	c.1712-312A>T
10	43245378	A	T	GATKstd	intron_variant	MODIFIER	REV1	481337	transcript	XM_022424592.1	protein_coding	11	c.1601-312A>T
10	48435006	T	A	GATKstd	intron_variant	MODIFIER	PRKCE	609934	transcript	XM_022424679.1	protein_coding	13	c.1920+1498T>A
10	48435006	T	A	GATKstd	intron_variant	MODIFIER	PRKCE	609934	transcript	XM_005626079.3	protein_coding	13	c.1920+1498T>A
10	48435006	T	A	GATKstd	intron_variant	MODIFIER	PRKCE	609934	transcript	XM_846768.5	protein_coding	13	c.1920+1498T>A
10	50548360	G	A	GATKstd	intron_variant	MODIFIER	LHCGR	481365	transcript	XM_022424693.1	protein_coding	9	c.759-633C>T
10	50548360	G	A	GATKstd	intron_variant	MODIFIER	LHCGR	481365	transcript	XM_022424694.1	protein_coding	8	c.684-633C>T
10	50548360	G	A	GATKstd	intron_variant	MODIFIER	LHCGR	481365	transcript	XM_022424695.1	protein_coding	8	c.573-633C>T
10	50548360	G	A	GATKstd	intron_variant	MODIFIER	LHCGR	481365	transcript	XM_022424696.1	protein_coding	7	c.498-633C>T
10	59721802	T	C	GATKstd	intron_variant	MODIFIER	LOC111097770	111097770	transcript	XR_002630867.1	pseudogene	2	n.269-2564T>C
10	62444380	C	T	GATKstd	intron_variant	MODIFIER	LOC111097779	111097779	transcript	XR_002630907.1	pseudogene	5	n.557+8863C>T
10	62444380	C	T	GATKstd	intron_variant	MODIFIER	LOC111097779	111097779	transcript	XR_002630908.1	pseudogene	5	n.556+8863C>T
10	64171220	G	A	GATKstd	3_prime_UTR_variant	MODIFIER	AFTPH	474618	transcript	XM_005626160.3	protein_coding	10	c.*889G>A
10	64171220	G	A	GATKstd	3_prime_UTR_variant	MODIFIER	AFTPH	474618	transcript	XM_022424816.1	protein_coding	11	c.*889G>A
10	64171220	G	A	GATKstd	3_prime_UTR_variant	MODIFIER	AFTPH	474618	transcript	XM_847586.5	protein_coding	10	c.*889G>A
10	64171220	G	A	GATKstd	3_prime_UTR_variant	MODIFIER	AFTPH	474618	transcript	XM_860997.5	protein_coding	9	c.*889G>A
10	64171220	G	A	GATKstd	3_prime_UTR_variant	MODIFIER	AFTPH	474618	transcript	XM_022424818.1	protein_coding	10	c.*889G>A
10	64171220	G	A	GATKstd	3_prime_UTR_variant	MODIFIER	AFTPH	474618	transcript	XM_022424815.1	protein_coding	10	c.*889G>A
10	64171220	G	A	GATKstd	upstream_gene_variant	MODIFIER	LOC111097860	111097860	transcript	XR_002631061.1	pseudogene	-1	n.-1820G>A
10	64171220	G	A	GATKstd	downstream_gene_variant	MODIFIER	AFTPH	474618	transcript	XR_002630919.1	pseudogene	-1	n.*900G>A
10	66053875	G	A	GATKstd	intergenic_region	MODIFIER	LOC111097797-LOC111097798	111097797-111097798	intergenic_region	111097797-111097798		-1	n.66053875G>A
11	94018	G	T	PASS	intergenic_region	MODIFIER	CHR_START-MGAT1	CHR_START-491674	intergenic_region	CHR_START-491674		-1	n.94018G>T
11	94031	T	A	PASS	intergenic_region	MODIFIER	CHR_START-MGAT1	CHR_START-491674	intergenic_region	CHR_START-491674		-1	n.94031T>A
11	1386111	A	G	GATKstd	intron_variant	MODIFIER	GFPT2	474653	transcript	XM_005626286.3	protein_coding	1	c.8-4034A>G
11	2701010	C	T	GATKstd	upstream_gene_variant	MODIFIER	ZFP2	474648	transcript	XM_022425104.1	protein_coding	-1	c.-3375G>A
11	2701010	C	T	GATKstd	upstream_gene_variant	MODIFIER	ZFP2	474648	transcript	XM_005626309.2	protein_coding	-1	c.-3600G>A
11	2701010	C	T	GATKstd	upstream_gene_variant	MODIFIER	ZFP2	474648	transcript	XM_022425096.1	protein_coding	-1	c.-7684G>A
11	2701010	C	T	GATKstd	upstream_gene_variant	MODIFIER	ZFP2	474648	transcript	XM_005626308.3	protein_coding	-1	c.-3600G>A
11	2701010	C	T	GATKstd	intergenic_region	MODIFIER	ZFP2-LOC607447	474648-607447	intergenic_region	474648-607447		-1	n.2701010C>T
11	2889959	G	GA	PASS	intergenic_region	MODIFIER	COR1X2-ZNF354A	481450-100688159	intergenic_region	481450-100688159		-1	n.2889959_2889960insA
11	3246471	AG	A	PASS	intron_variant	MODIFIER	COL23A1	607556	transcript	XM_005626312.2	protein_coding	2	c.353-6374delG
11	3246471	AG	A	PASS	intron_variant	MODIFIER	COL23A1	607556	transcript	XM_022425115.1	protein_coding	2	c.353-6374delG
11	3246471	AG	A	PASS	intron_variant	MODIFIER	COL23A1	607556	transcript	XM_022425114.1	protein_coding	2	c.353-6374delG
11	3246471	AG	A	PASS	intron_variant	MODIFIER	COL23A1	607556	transcript	XM_022425116.1	protein_coding	2	c.353-6374delG
11	3246471	AG	A	PASS	intron_variant	MODIFIER	COL23A1	607556	transcript	XM_022425117.1	protein_coding	2	c.353-6374delG
11	3246471	AG	A	PASS	intron_variant	MODIFIER	COL23A1	607556	transcript	XM_022425112.1	protein_coding	2	c.353-6374delG
11	3246471	AG	A	PASS	intron_variant	MODIFIER	COL23A1	607556	transcript	XM_022425113.1	protein_coding	2	c.353-6374delG
11	4280999	GGC	G	PASS	intron_variant	MODIFIER	KCNN2	474640	transcript	XM_022425123.1	protein_coding	1	c.1302+291_1302+292delGC
11	4280999	GGC	G	PASS	intron_variant	MODIFIER	KCNN2	474640	transcript	XM_022425125.1	protein_coding	1	c.1302+291_1302+292delGC
11	5650471	C	T	GATKstd	intergenic_region	MODIFIER	AP3S1-LVRN	607494-481434	intergenic_region	607494-481434		-1	n.5650471C>T
11	9723529	G	A	PASS	intergenic_region	MODIFIER	LOC111097920-PRR16	111097920-100686740	intergenic_region	111097920-100686740		-1	n.9723529G>A
11	11475545	A	T	PASS	intergenic_region	MODIFIER	LOC102151636-LOC608550	102151636-608550	intergenic_region	102151636-608550		-1	n.11475545A>T
11	11475546	T	A	PASS	intergenic_region	MODIFIER	LOC102151636-LOC608550	102151636-608550	intergenic_region	102151636-608550		-1	n.11475546T>A
11	13763647	G	A	GATKstd	intron_variant	MODIFIER	LOC102153457	102153457	transcript	XR_002631294.1	pseudogene	5	n.1179-5523G>A
11	13763647	G	A	GATKstd	intron_variant	MODIFIER	LOC102153457	102153457	transcript	XR_002631295.1	pseudogene	4	n.1016-5523G>A
11	13763647	G	A	GATKstd	intron_variant	MODIFIER	LOC102153457	102153457	transcript	XR_002631291.1	pseudogene	4	n.1014-5523G>A
11	13763647	G	A	GATKstd	intron_variant	MODIFIER	LOC102153457	102153457	transcript	XR_002631293.1	pseudogene	4	n.1013-5523G>A
11	13763647	G	A	GATKstd	intron_variant	MODIFIER	LOC102153457	102153457	transcript	XR_002631292.1	pseudogene	4	n.1012-5701G>A
11	13763647	G	A	GATKstd	intron_variant	MODIFIER	LOC102153457	102153457	transcript	XR_002631296.1	pseudogene	4	n.1011-5523G>A
11	13885435	G	T	GATKstd	intergenic_region	MODIFIER	LOC111098003-LOC111098004	111098003-111098004	intergenic_region	111098003-111098004		-1	n.13885435G>T
11	13938851	C	G	GATKstd	intergenic_region	MODIFIER	LOC111098003-LOC111098004	111098003-111098004	intergenic_region	111098003-111098004		-1	n.13938851C>G
11	14693128	A	G	GATKstd	intron_variant	MODIFIER	LOC106559535	106559535	transcript	XM_022425228.1	protein_coding	4	c.131-83506T>C
11	14693128	A	G	GATKstd	intron_variant	MODIFIER	LOC106559535	106559535	transcript	XM_022425229.1	protein_coding	3	c.131-83506T>C
11	14693128	A	G	GATKstd	intron_variant	MODIFIER	LOC106559535	106559535	transcript	XM_022425231.1	protein_coding	5	c.261+14925T>C
11	17202083	C	G	PASS	intron_variant	MODIFIER	SLC12A2	481490	transcript	XM_538611.6	protein_coding	9	c.1340-201C>G
11	21696922	G	A	GATKstd	intron_variant	MODIFIER	FSTL4	481504	transcript	XM_022425284.1	protein_coding	3	c.230-37899C>T
11	21696922	G	A	GATKstd	intron_variant	MODIFIER	FSTL4	481504	transcript	XM_022425285.1	protein_coding	3	c.230-37899C>T
11	21696922	G	A	GATKstd	intron_variant	MODIFIER	FSTL4	481504	transcript	XM_022425287.1	protein_coding	3	c.230-37899C>T
11	21696922	G	A	GATKstd	intron_variant	MODIFIER	FSTL4	481504	transcript	XM_022425286.1	protein_coding	3	c.161-37899C>T
11	21728288	CTT	C	PASS	intron_variant	MODIFIER	FSTL4	481504	transcript	XM_022425284.1	protein_coding	3	c.230-69267_230-69266delAA
11	21728288	CTT	C	PASS	intron_variant	MODIFIER	FSTL4	481504	transcript	XM_022425285.1	protein_coding	3	c.230-69267_230-69266delAA
11	21728288	CTT	C	PASS	intron_variant	MODIFIER	FSTL4	481504	transcript	XM_022425287.1	protein_coding	3	c.230-69267_230-69266delAA
11	21728288	CTT	C	PASS	intron_variant	MODIFIER	FSTL4	481504	transcript	XM_022425286.1	protein_coding	3	c.161-69267_161-69266delAA
11	25017162	G	A	GATKstd	upstream_gene_variant	MODIFIER	SPOCK1	474688	transcript	XM_022425052.1	protein_coding	-1	c.-3762C>T
11	25017162	G	A	GATKstd	intergenic_region	MODIFIER	SPOCK1-LOC111097932	474688-111097932	intergenic_region	474688-111097932		-1	n.25017162G>A
11	27463213	A	G	GATKstd	intron_variant	MODIFIER	UHRF2	474702	transcript	XM_859327.5	protein_coding	10	c.1607+1257A>G
11	27463213	A	G	GATKstd	intron_variant	MODIFIER	UHRF2	474702	transcript	XM_022425369.1	protein_coding	10	c.1607+1257A>G
11	27463213	A	G	GATKstd	intron_variant	MODIFIER	UHRF2	474702	transcript	XM_005626614.3	protein_coding	9	c.1373+1257A>G
11	28073537	GT	G	PASS	intron_variant	MODIFIER	KDM4C	474704	transcript	XM_005626615.3	protein_coding	21	c.2823+10748delT
11	28073537	GT	G	PASS	intron_variant	MODIFIER	KDM4C	474704	transcript	XM_022425370.1	protein_coding	21	c.2823+10748delT
11	28073537	GT	G	PASS	intron_variant	MODIFIER	KDM4C	474704	transcript	XM_022425372.1	protein_coding	21	c.2824-225delT
11	28073537	GT	G	PASS	intron_variant	MODIFIER	KDM4C	474704	transcript	XR_002631401.1	pseudogene	21	n.3505+10748delT
11	28073537	GT	G	PASS	intron_variant	MODIFIER	KDM4C	474704	transcript	XM_005626618.3	protein_coding	20	c.2772+10748delT
11	28073537	GT	G	PASS	intron_variant	MODIFIER	KDM4C	474704	transcript	XM_005626617.3	protein_coding	20	c.2823+10748delT
11	28073537	GT	G	PASS	intron_variant	MODIFIER	KDM4C	474704	transcript	XM_005626616.3	protein_coding	22	c.2823+10748delT
11	28073537	GT	G	PASS	intron_variant	MODIFIER	KDM4C	474704	transcript	XM_014117748.2	protein_coding	20	c.2823+10748delT
11	28875836	A	T	GATKstd	intergenic_region	MODIFIER	DMAC1-LOC100685504	474705-100685504	intergenic_region	474705-100685504		-1	n.28875836A>T
11	30316994	A	G	GATKstd	intron_variant	MODIFIER	PTPRD	481538	transcript	XM_022425377.1	protein_coding	6	c.-281-27549T>C
11	30316994	A	G	GATKstd	intron_variant	MODIFIER	PTPRD	481538	transcript	XM_014117756.2	protein_coding	6	c.-281-27549T>C
11	30316994	A	G	GATKstd	intron_variant	MODIFIER	PTPRD	481538	transcript	XM_014117757.2	protein_coding	6	c.-281-27549T>C
11	30316994	A	G	GATKstd	intron_variant	MODIFIER	PTPRD	481538	transcript	XM_022425406.1	protein_coding	6	c.-281-27549T>C
11	30316994	A	G	GATKstd	intron_variant	MODIFIER	PTPRD	481538	transcript	XM_022425407.1	protein_coding	6	c.-281-27549T>C
11	30316994	A	G	GATKstd	intron_variant	MODIFIER	PTPRD	481538	transcript	XM_022425408.1	protein_coding	6	c.-281-27549T>C
11	30316994	A	G	GATKstd	intron_variant	MODIFIER	PTPRD	481538	transcript	XM_022425409.1	protein_coding	6	c.-281-27549T>C
11	30316994	A	G	GATKstd	intron_variant	MODIFIER	PTPRD	481538	transcript	XM_022425410.1	protein_coding	6	c.-281-27549T>C
11	30316994	A	G	GATKstd	intron_variant	MODIFIER	PTPRD	481538	transcript	XM_022425411.1	protein_coding	6	c.-281-27549T>C
11	30316994	A	G	GATKstd	intron_variant	MODIFIER	PTPRD	481538	transcript	XM_022425412.1	protein_coding	6	c.-281-27549T>C
11	30316994	A	G	GATKstd	intron_variant	MODIFIER	PTPRD	481538	transcript	XM_022425413.1	protein_coding	6	c.-281-27549T>C
11	30316994	A	G	GATKstd	intron_variant	MODIFIER	PTPRD	481538	transcript	XM_022425398.1	protein_coding	6	c.-281-27549T>C
11	30316994	A	G	GATKstd	intron_variant	MODIFIER	PTPRD	481538	transcript	XM_022425400.1	protein_coding	6	c.-281-27549T>C
11	30316994	A	G	GATKstd	intron_variant	MODIFIER	PTPRD	481538	transcript	XM_022425405.1	protein_coding	6	c.-281-27549T>C
11	30316994	A	G	GATKstd	intron_variant	MODIFIER	PTPRD	481538	transcript	XM_022425414.1	protein_coding	6	c.-281-27549T>C
11	30316994	A	G	GATKstd	intron_variant	MODIFIER	PTPRD	481538	transcript	XM_005626620.3	protein_coding	6	c.-281-27549T>C
11	30316994	A	G	GATKstd	intron_variant	MODIFIER	PTPRD	481538	transcript	XM_014117752.2	protein_coding	6	c.-281-27549T>C
11	30316994	A	G	GATKstd	intron_variant	MODIFIER	PTPRD	481538	transcript	XM_014117753.2	protein_coding	6	c.-281-27549T>C
11	30316994	A	G	GATKstd	intron_variant	MODIFIER	PTPRD	481538	transcript	XM_022425378.1	protein_coding	5	c.-281-27549T>C
11	30316994	A	G	GATKstd	intron_variant	MODIFIER	PTPRD	481538	transcript	XM_022425379.1	protein_coding	6	c.-281-27549T>C
11	30316994	A	G	GATKstd	intron_variant	MODIFIER	PTPRD	481538	transcript	XM_022425380.1	protein_coding	6	c.-281-27549T>C
11	30316994	A	G	GATKstd	intron_variant	MODIFIER	PTPRD	481538	transcript	XM_022425383.1	protein_coding	6	c.-281-27549T>C
11	30316994	A	G	GATKstd	intron_variant	MODIFIER	PTPRD	481538	transcript	XM_022425384.1	protein_coding	6	c.-281-27549T>C
11	30316994	A	G	GATKstd	intron_variant	MODIFIER	PTPRD	481538	transcript	XM_022425385.1	protein_coding	6	c.-281-27549T>C
11	30316994	A	G	GATKstd	intron_variant	MODIFIER	PTPRD	481538	transcript	XM_022425386.1	protein_coding	6	c.-281-27549T>C
11	30316994	A	G	GATKstd	intron_variant	MODIFIER	PTPRD	481538	transcript	XM_022425387.1	protein_coding	6	c.-281-27549T>C
11	30316994	A	G	GATKstd	intron_variant	MODIFIER	PTPRD	481538	transcript	XM_022425388.1	protein_coding	6	c.-281-27549T>C
11	30316994	A	G	GATKstd	intron_variant	MODIFIER	PTPRD	481538	transcript	XM_022425389.1	protein_coding	6	c.-281-27549T>C
11	30316994	A	G	GATKstd	intron_variant	MODIFIER	PTPRD	481538	transcript	XM_022425390.1	protein_coding	6	c.-281-27549T>C
11	30316994	A	G	GATKstd	intron_variant	MODIFIER	PTPRD	481538	transcript	XM_022425391.1	protein_coding	6	c.-281-27549T>C
11	30316994	A	G	GATKstd	intron_variant	MODIFIER	PTPRD	481538	transcript	XM_022425392.1	protein_coding	6	c.-281-27549T>C
11	30316994	A	G	GATKstd	intron_variant	MODIFIER	PTPRD	481538	transcript	XM_022425393.1	protein_coding	6	c.-281-27549T>C
11	30316994	A	G	GATKstd	intron_variant	MODIFIER	PTPRD	481538	transcript	XM_022425394.1	protein_coding	6	c.-281-27549T>C
11	30316994	A	G	GATKstd	intron_variant	MODIFIER	PTPRD	481538	transcript	XM_022425395.1	protein_coding	6	c.-281-27549T>C
11	30316994	A	G	GATKstd	intron_variant	MODIFIER	PTPRD	481538	transcript	XM_022425396.1	protein_coding	6	c.-281-27549T>C
11	30316994	A	G	GATKstd	intron_variant	MODIFIER	PTPRD	481538	transcript	XM_022425397.1	protein_coding	6	c.-281-27549T>C
11	30316994	A	G	GATKstd	intron_variant	MODIFIER	PTPRD	481538	transcript	XM_022425399.1	protein_coding	6	c.-281-27549T>C
11	30316994	A	G	GATKstd	intron_variant	MODIFIER	PTPRD	481538	transcript	XM_022425401.1	protein_coding	6	c.-281-27549T>C
11	30316994	A	G	GATKstd	intron_variant	MODIFIER	PTPRD	481538	transcript	XM_022425402.1	protein_coding	6	c.-281-27549T>C
11	30316994	A	G	GATKstd	intron_variant	MODIFIER	PTPRD	481538	transcript	XM_022425403.1	protein_coding	6	c.-281-27549T>C
11	30316994	A	G	GATKstd	intron_variant	MODIFIER	PTPRD	481538	transcript	XM_022425404.1	protein_coding	6	c.-281-27549T>C
11	30316994	A	G	GATKstd	intron_variant	MODIFIER	PTPRD	481538	transcript	XM_022425381.1	protein_coding	6	c.-281-27549T>C
11	30316994	A	G	GATKstd	intron_variant	MODIFIER	PTPRD	481538	transcript	XM_022425382.1	protein_coding	6	c.-281-27549T>C
11	30316996	A	C	GATKstd	intron_variant	MODIFIER	PTPRD	481538	transcript	XM_022425377.1	protein_coding	6	c.-281-27551T>G
11	30316996	A	C	GATKstd	intron_variant	MODIFIER	PTPRD	481538	transcript	XM_014117756.2	protein_coding	6	c.-281-27551T>G
11	30316996	A	C	GATKstd	intron_variant	MODIFIER	PTPRD	481538	transcript	XM_014117757.2	protein_coding	6	c.-281-27551T>G
11	30316996	A	C	GATKstd	intron_variant	MODIFIER	PTPRD	481538	transcript	XM_022425406.1	protein_coding	6	c.-281-27551T>G
11	30316996	A	C	GATKstd	intron_variant	MODIFIER	PTPRD	481538	transcript	XM_022425407.1	protein_coding	6	c.-281-27551T>G
11	30316996	A	C	GATKstd	intron_variant	MODIFIER	PTPRD	481538	transcript	XM_022425408.1	protein_coding	6	c.-281-27551T>G
11	30316996	A	C	GATKstd	intron_variant	MODIFIER	PTPRD	481538	transcript	XM_022425409.1	protein_coding	6	c.-281-27551T>G
11	30316996	A	C	GATKstd	intron_variant	MODIFIER	PTPRD	481538	transcript	XM_022425410.1	protein_coding	6	c.-281-27551T>G
11	30316996	A	C	GATKstd	intron_variant	MODIFIER	PTPRD	481538	transcript	XM_022425411.1	protein_coding	6	c.-281-27551T>G
11	30316996	A	C	GATKstd	intron_variant	MODIFIER	PTPRD	481538	transcript	XM_022425412.1	protein_coding	6	c.-281-27551T>G
11	30316996	A	C	GATKstd	intron_variant	MODIFIER	PTPRD	481538	transcript	XM_022425413.1	protein_coding	6	c.-281-27551T>G
11	30316996	A	C	GATKstd	intron_variant	MODIFIER	PTPRD	481538	transcript	XM_022425398.1	protein_coding	6	c.-281-27551T>G
11	30316996	A	C	GATKstd	intron_variant	MODIFIER	PTPRD	481538	transcript	XM_022425400.1	protein_coding	6	c.-281-27551T>G
11	30316996	A	C	GATKstd	intron_variant	MODIFIER	PTPRD	481538	transcript	XM_022425405.1	protein_coding	6	c.-281-27551T>G
11	30316996	A	C	GATKstd	intron_variant	MODIFIER	PTPRD	481538	transcript	XM_022425414.1	protein_coding	6	c.-281-27551T>G
11	30316996	A	C	GATKstd	intron_variant	MODIFIER	PTPRD	481538	transcript	XM_005626620.3	protein_coding	6	c.-281-27551T>G
11	30316996	A	C	GATKstd	intron_variant	MODIFIER	PTPRD	481538	transcript	XM_014117752.2	protein_coding	6	c.-281-27551T>G
11	30316996	A	C	GATKstd	intron_variant	MODIFIER	PTPRD	481538	transcript	XM_014117753.2	protein_coding	6	c.-281-27551T>G
11	30316996	A	C	GATKstd	intron_variant	MODIFIER	PTPRD	481538	transcript	XM_022425378.1	protein_coding	5	c.-281-27551T>G
11	30316996	A	C	GATKstd	intron_variant	MODIFIER	PTPRD	481538	transcript	XM_022425379.1	protein_coding	6	c.-281-27551T>G
11	30316996	A	C	GATKstd	intron_variant	MODIFIER	PTPRD	481538	transcript	XM_022425380.1	protein_coding	6	c.-281-27551T>G
11	30316996	A	C	GATKstd	intron_variant	MODIFIER	PTPRD	481538	transcript	XM_022425383.1	protein_coding	6	c.-281-27551T>G
11	30316996	A	C	GATKstd	intron_variant	MODIFIER	PTPRD	481538	transcript	XM_022425384.1	protein_coding	6	c.-281-27551T>G
11	30316996	A	C	GATKstd	intron_variant	MODIFIER	PTPRD	481538	transcript	XM_022425385.1	protein_coding	6	c.-281-27551T>G
11	30316996	A	C	GATKstd	intron_variant	MODIFIER	PTPRD	481538	transcript	XM_022425386.1	protein_coding	6	c.-281-27551T>G
11	30316996	A	C	GATKstd	intron_variant	MODIFIER	PTPRD	481538	transcript	XM_022425387.1	protein_coding	6	c.-281-27551T>G
11	30316996	A	C	GATKstd	intron_variant	MODIFIER	PTPRD	481538	transcript	XM_022425388.1	protein_coding	6	c.-281-27551T>G
11	30316996	A	C	GATKstd	intron_variant	MODIFIER	PTPRD	481538	transcript	XM_022425389.1	protein_coding	6	c.-281-27551T>G
11	30316996	A	C	GATKstd	intron_variant	MODIFIER	PTPRD	481538	transcript	XM_022425390.1	protein_coding	6	c.-281-27551T>G
11	30316996	A	C	GATKstd	intron_variant	MODIFIER	PTPRD	481538	transcript	XM_022425391.1	protein_coding	6	c.-281-27551T>G
11	30316996	A	C	GATKstd	intron_variant	MODIFIER	PTPRD	481538	transcript	XM_022425392.1	protein_coding	6	c.-281-27551T>G
11	30316996	A	C	GATKstd	intron_variant	MODIFIER	PTPRD	481538	transcript	XM_022425393.1	protein_coding	6	c.-281-27551T>G
11	30316996	A	C	GATKstd	intron_variant	MODIFIER	PTPRD	481538	transcript	XM_022425394.1	protein_coding	6	c.-281-27551T>G
11	30316996	A	C	GATKstd	intron_variant	MODIFIER	PTPRD	481538	transcript	XM_022425395.1	protein_coding	6	c.-281-27551T>G
11	30316996	A	C	GATKstd	intron_variant	MODIFIER	PTPRD	481538	transcript	XM_022425396.1	protein_coding	6	c.-281-27551T>G
11	30316996	A	C	GATKstd	intron_variant	MODIFIER	PTPRD	481538	transcript	XM_022425397.1	protein_coding	6	c.-281-27551T>G
11	30316996	A	C	GATKstd	intron_variant	MODIFIER	PTPRD	481538	transcript	XM_022425399.1	protein_coding	6	c.-281-27551T>G
11	30316996	A	C	GATKstd	intron_variant	MODIFIER	PTPRD	481538	transcript	XM_022425401.1	protein_coding	6	c.-281-27551T>G
11	30316996	A	C	GATKstd	intron_variant	MODIFIER	PTPRD	481538	transcript	XM_022425402.1	protein_coding	6	c.-281-27551T>G
11	30316996	A	C	GATKstd	intron_variant	MODIFIER	PTPRD	481538	transcript	XM_022425403.1	protein_coding	6	c.-281-27551T>G
11	30316996	A	C	GATKstd	intron_variant	MODIFIER	PTPRD	481538	transcript	XM_022425404.1	protein_coding	6	c.-281-27551T>G
11	30316996	A	C	GATKstd	intron_variant	MODIFIER	PTPRD	481538	transcript	XM_022425381.1	protein_coding	6	c.-281-27551T>G
11	30316996	A	C	GATKstd	intron_variant	MODIFIER	PTPRD	481538	transcript	XM_022425382.1	protein_coding	6	c.-281-27551T>G
11	30988948	A	ATTAGTATCTTTCTTTTTTTTTTTTTTTTTTTTTTTTTTTTTTTTTTTTTTTTTTTTTAGTATTTTT	PASS	intron_variant	MODIFIER	PTPRD	481538	transcript	XM_022425377.1	protein_coding	2	c.-545+24139_-545+24140insAAAAATACTAAAAAAAAAAAAAAAAAAAAAAAAAAAAAAAAAAAAAAAAAAAAAGAAAGATACTAA
11	30988948	A	ATTAGTATCTTTCTTTTTTTTTTTTTTTTTTTTTTTTTTTTTTTTTTTTTTTTTTTTTAGTATTTTT	PASS	intron_variant	MODIFIER	PTPRD	481538	transcript	XM_014117756.2	protein_coding	2	c.-545+24139_-545+24140insAAAAATACTAAAAAAAAAAAAAAAAAAAAAAAAAAAAAAAAAAAAAAAAAAAAAGAAAGATACTAA
11	30988948	A	ATTAGTATCTTTCTTTTTTTTTTTTTTTTTTTTTTTTTTTTTTTTTTTTTTTTTTTTTAGTATTTTT	PASS	intron_variant	MODIFIER	PTPRD	481538	transcript	XM_014117757.2	protein_coding	2	c.-545+24139_-545+24140insAAAAATACTAAAAAAAAAAAAAAAAAAAAAAAAAAAAAAAAAAAAAAAAAAAAAGAAAGATACTAA
11	30988948	A	ATTAGTATCTTTCTTTTTTTTTTTTTTTTTTTTTTTTTTTTTTTTTTTTTTTTTTTTTAGTATTTTT	PASS	intron_variant	MODIFIER	PTPRD	481538	transcript	XM_022425406.1	protein_coding	2	c.-545+24139_-545+24140insAAAAATACTAAAAAAAAAAAAAAAAAAAAAAAAAAAAAAAAAAAAAAAAAAAAAGAAAGATACTAA
11	30988948	A	ATTAGTATCTTTCTTTTTTTTTTTTTTTTTTTTTTTTTTTTTTTTTTTTTTTTTTTTTAGTATTTTT	PASS	intron_variant	MODIFIER	PTPRD	481538	transcript	XM_022425407.1	protein_coding	2	c.-545+24139_-545+24140insAAAAATACTAAAAAAAAAAAAAAAAAAAAAAAAAAAAAAAAAAAAAAAAAAAAAGAAAGATACTAA
11	30988948	A	ATTAGTATCTTTCTTTTTTTTTTTTTTTTTTTTTTTTTTTTTTTTTTTTTTTTTTTTTAGTATTTTT	PASS	intron_variant	MODIFIER	PTPRD	481538	transcript	XM_022425408.1	protein_coding	2	c.-545+24139_-545+24140insAAAAATACTAAAAAAAAAAAAAAAAAAAAAAAAAAAAAAAAAAAAAAAAAAAAAGAAAGATACTAA
11	30988948	A	ATTAGTATCTTTCTTTTTTTTTTTTTTTTTTTTTTTTTTTTTTTTTTTTTTTTTTTTTAGTATTTTT	PASS	intron_variant	MODIFIER	PTPRD	481538	transcript	XM_022425409.1	protein_coding	2	c.-545+24139_-545+24140insAAAAATACTAAAAAAAAAAAAAAAAAAAAAAAAAAAAAAAAAAAAAAAAAAAAAGAAAGATACTAA
11	30988948	A	ATTAGTATCTTTCTTTTTTTTTTTTTTTTTTTTTTTTTTTTTTTTTTTTTTTTTTTTTAGTATTTTT	PASS	intron_variant	MODIFIER	PTPRD	481538	transcript	XM_022425410.1	protein_coding	2	c.-545+24139_-545+24140insAAAAATACTAAAAAAAAAAAAAAAAAAAAAAAAAAAAAAAAAAAAAAAAAAAAAGAAAGATACTAA
11	30988948	A	ATTAGTATCTTTCTTTTTTTTTTTTTTTTTTTTTTTTTTTTTTTTTTTTTTTTTTTTTAGTATTTTT	PASS	intron_variant	MODIFIER	PTPRD	481538	transcript	XM_022425411.1	protein_coding	2	c.-545+24139_-545+24140insAAAAATACTAAAAAAAAAAAAAAAAAAAAAAAAAAAAAAAAAAAAAAAAAAAAAGAAAGATACTAA
11	30988948	A	ATTAGTATCTTTCTTTTTTTTTTTTTTTTTTTTTTTTTTTTTTTTTTTTTTTTTTTTTAGTATTTTT	PASS	intron_variant	MODIFIER	PTPRD	481538	transcript	XM_022425412.1	protein_coding	2	c.-545+24139_-545+24140insAAAAATACTAAAAAAAAAAAAAAAAAAAAAAAAAAAAAAAAAAAAAAAAAAAAAGAAAGATACTAA
11	30988948	A	ATTAGTATCTTTCTTTTTTTTTTTTTTTTTTTTTTTTTTTTTTTTTTTTTTTTTTTTTAGTATTTTT	PASS	intron_variant	MODIFIER	PTPRD	481538	transcript	XM_022425413.1	protein_coding	2	c.-545+24139_-545+24140insAAAAATACTAAAAAAAAAAAAAAAAAAAAAAAAAAAAAAAAAAAAAAAAAAAAAGAAAGATACTAA
11	30988948	A	ATTAGTATCTTTCTTTTTTTTTTTTTTTTTTTTTTTTTTTTTTTTTTTTTTTTTTTTTAGTATTTTT	PASS	intron_variant	MODIFIER	PTPRD	481538	transcript	XM_022425398.1	protein_coding	2	c.-545+24139_-545+24140insAAAAATACTAAAAAAAAAAAAAAAAAAAAAAAAAAAAAAAAAAAAAAAAAAAAAGAAAGATACTAA
11	30988948	A	ATTAGTATCTTTCTTTTTTTTTTTTTTTTTTTTTTTTTTTTTTTTTTTTTTTTTTTTTAGTATTTTT	PASS	intron_variant	MODIFIER	PTPRD	481538	transcript	XM_022425400.1	protein_coding	2	c.-545+24139_-545+24140insAAAAATACTAAAAAAAAAAAAAAAAAAAAAAAAAAAAAAAAAAAAAAAAAAAAAGAAAGATACTAA
11	30988948	A	ATTAGTATCTTTCTTTTTTTTTTTTTTTTTTTTTTTTTTTTTTTTTTTTTTTTTTTTTAGTATTTTT	PASS	intron_variant	MODIFIER	PTPRD	481538	transcript	XM_022425405.1	protein_coding	2	c.-545+24139_-545+24140insAAAAATACTAAAAAAAAAAAAAAAAAAAAAAAAAAAAAAAAAAAAAAAAAAAAAGAAAGATACTAA
11	30988948	A	ATTAGTATCTTTCTTTTTTTTTTTTTTTTTTTTTTTTTTTTTTTTTTTTTTTTTTTTTAGTATTTTT	PASS	intron_variant	MODIFIER	PTPRD	481538	transcript	XM_022425414.1	protein_coding	2	c.-545+24139_-545+24140insAAAAATACTAAAAAAAAAAAAAAAAAAAAAAAAAAAAAAAAAAAAAAAAAAAAAGAAAGATACTAA
11	30988948	A	ATTAGTATCTTTCTTTTTTTTTTTTTTTTTTTTTTTTTTTTTTTTTTTTTTTTTTTTTAGTATTTTT	PASS	intron_variant	MODIFIER	PTPRD	481538	transcript	XM_005626620.3	protein_coding	2	c.-545+24139_-545+24140insAAAAATACTAAAAAAAAAAAAAAAAAAAAAAAAAAAAAAAAAAAAAAAAAAAAAGAAAGATACTAA
11	30988948	A	ATTAGTATCTTTCTTTTTTTTTTTTTTTTTTTTTTTTTTTTTTTTTTTTTTTTTTTTTAGTATTTTT	PASS	intron_variant	MODIFIER	PTPRD	481538	transcript	XM_014117752.2	protein_coding	2	c.-545+24139_-545+24140insAAAAATACTAAAAAAAAAAAAAAAAAAAAAAAAAAAAAAAAAAAAAAAAAAAAAGAAAGATACTAA
11	30988948	A	ATTAGTATCTTTCTTTTTTTTTTTTTTTTTTTTTTTTTTTTTTTTTTTTTTTTTTTTTAGTATTTTT	PASS	intron_variant	MODIFIER	PTPRD	481538	transcript	XM_014117753.2	protein_coding	2	c.-545+24139_-545+24140insAAAAATACTAAAAAAAAAAAAAAAAAAAAAAAAAAAAAAAAAAAAAAAAAAAAAGAAAGATACTAA
11	30988948	A	ATTAGTATCTTTCTTTTTTTTTTTTTTTTTTTTTTTTTTTTTTTTTTTTTTTTTTTTTAGTATTTTT	PASS	intron_variant	MODIFIER	PTPRD	481538	transcript	XM_022425378.1	protein_coding	1	c.-544-276440_-544-276439insAAAAATACTAAAAAAAAAAAAAAAAAAAAAAAAAAAAAAAAAAAAAAAAAAAAAGAAAGATACTAA
11	30988948	A	ATTAGTATCTTTCTTTTTTTTTTTTTTTTTTTTTTTTTTTTTTTTTTTTTTTTTTTTTAGTATTTTT	PASS	intron_variant	MODIFIER	PTPRD	481538	transcript	XM_022425379.1	protein_coding	2	c.-545+24139_-545+24140insAAAAATACTAAAAAAAAAAAAAAAAAAAAAAAAAAAAAAAAAAAAAAAAAAAAAGAAAGATACTAA
11	30988948	A	ATTAGTATCTTTCTTTTTTTTTTTTTTTTTTTTTTTTTTTTTTTTTTTTTTTTTTTTTAGTATTTTT	PASS	intron_variant	MODIFIER	PTPRD	481538	transcript	XM_022425380.1	protein_coding	2	c.-545+24139_-545+24140insAAAAATACTAAAAAAAAAAAAAAAAAAAAAAAAAAAAAAAAAAAAAAAAAAAAAGAAAGATACTAA
11	30988948	A	ATTAGTATCTTTCTTTTTTTTTTTTTTTTTTTTTTTTTTTTTTTTTTTTTTTTTTTTTAGTATTTTT	PASS	intron_variant	MODIFIER	PTPRD	481538	transcript	XM_022425383.1	protein_coding	2	c.-545+24139_-545+24140insAAAAATACTAAAAAAAAAAAAAAAAAAAAAAAAAAAAAAAAAAAAAAAAAAAAAGAAAGATACTAA
11	30988948	A	ATTAGTATCTTTCTTTTTTTTTTTTTTTTTTTTTTTTTTTTTTTTTTTTTTTTTTTTTAGTATTTTT	PASS	intron_variant	MODIFIER	PTPRD	481538	transcript	XM_022425384.1	protein_coding	2	c.-545+24139_-545+24140insAAAAATACTAAAAAAAAAAAAAAAAAAAAAAAAAAAAAAAAAAAAAAAAAAAAAGAAAGATACTAA
11	30988948	A	ATTAGTATCTTTCTTTTTTTTTTTTTTTTTTTTTTTTTTTTTTTTTTTTTTTTTTTTTAGTATTTTT	PASS	intron_variant	MODIFIER	PTPRD	481538	transcript	XM_022425385.1	protein_coding	2	c.-545+24139_-545+24140insAAAAATACTAAAAAAAAAAAAAAAAAAAAAAAAAAAAAAAAAAAAAAAAAAAAAGAAAGATACTAA
11	30988948	A	ATTAGTATCTTTCTTTTTTTTTTTTTTTTTTTTTTTTTTTTTTTTTTTTTTTTTTTTTAGTATTTTT	PASS	intron_variant	MODIFIER	PTPRD	481538	transcript	XM_022425386.1	protein_coding	2	c.-545+24139_-545+24140insAAAAATACTAAAAAAAAAAAAAAAAAAAAAAAAAAAAAAAAAAAAAAAAAAAAAGAAAGATACTAA
11	30988948	A	ATTAGTATCTTTCTTTTTTTTTTTTTTTTTTTTTTTTTTTTTTTTTTTTTTTTTTTTTAGTATTTTT	PASS	intron_variant	MODIFIER	PTPRD	481538	transcript	XM_022425387.1	protein_coding	2	c.-545+24139_-545+24140insAAAAATACTAAAAAAAAAAAAAAAAAAAAAAAAAAAAAAAAAAAAAAAAAAAAAGAAAGATACTAA
11	30988948	A	ATTAGTATCTTTCTTTTTTTTTTTTTTTTTTTTTTTTTTTTTTTTTTTTTTTTTTTTTAGTATTTTT	PASS	intron_variant	MODIFIER	PTPRD	481538	transcript	XM_022425388.1	protein_coding	2	c.-545+24139_-545+24140insAAAAATACTAAAAAAAAAAAAAAAAAAAAAAAAAAAAAAAAAAAAAAAAAAAAAGAAAGATACTAA
11	30988948	A	ATTAGTATCTTTCTTTTTTTTTTTTTTTTTTTTTTTTTTTTTTTTTTTTTTTTTTTTTAGTATTTTT	PASS	intron_variant	MODIFIER	PTPRD	481538	transcript	XM_022425389.1	protein_coding	2	c.-545+24139_-545+24140insAAAAATACTAAAAAAAAAAAAAAAAAAAAAAAAAAAAAAAAAAAAAAAAAAAAAGAAAGATACTAA
11	30988948	A	ATTAGTATCTTTCTTTTTTTTTTTTTTTTTTTTTTTTTTTTTTTTTTTTTTTTTTTTTAGTATTTTT	PASS	intron_variant	MODIFIER	PTPRD	481538	transcript	XM_022425390.1	protein_coding	2	c.-545+24139_-545+24140insAAAAATACTAAAAAAAAAAAAAAAAAAAAAAAAAAAAAAAAAAAAAAAAAAAAAGAAAGATACTAA
11	30988948	A	ATTAGTATCTTTCTTTTTTTTTTTTTTTTTTTTTTTTTTTTTTTTTTTTTTTTTTTTTAGTATTTTT	PASS	intron_variant	MODIFIER	PTPRD	481538	transcript	XM_022425391.1	protein_coding	2	c.-545+24139_-545+24140insAAAAATACTAAAAAAAAAAAAAAAAAAAAAAAAAAAAAAAAAAAAAAAAAAAAAGAAAGATACTAA
11	30988948	A	ATTAGTATCTTTCTTTTTTTTTTTTTTTTTTTTTTTTTTTTTTTTTTTTTTTTTTTTTAGTATTTTT	PASS	intron_variant	MODIFIER	PTPRD	481538	transcript	XM_022425392.1	protein_coding	2	c.-545+24139_-545+24140insAAAAATACTAAAAAAAAAAAAAAAAAAAAAAAAAAAAAAAAAAAAAAAAAAAAAGAAAGATACTAA
11	30988948	A	ATTAGTATCTTTCTTTTTTTTTTTTTTTTTTTTTTTTTTTTTTTTTTTTTTTTTTTTTAGTATTTTT	PASS	intron_variant	MODIFIER	PTPRD	481538	transcript	XM_022425393.1	protein_coding	2	c.-545+24139_-545+24140insAAAAATACTAAAAAAAAAAAAAAAAAAAAAAAAAAAAAAAAAAAAAAAAAAAAAGAAAGATACTAA
11	30988948	A	ATTAGTATCTTTCTTTTTTTTTTTTTTTTTTTTTTTTTTTTTTTTTTTTTTTTTTTTTAGTATTTTT	PASS	intron_variant	MODIFIER	PTPRD	481538	transcript	XM_022425394.1	protein_coding	2	c.-545+24139_-545+24140insAAAAATACTAAAAAAAAAAAAAAAAAAAAAAAAAAAAAAAAAAAAAAAAAAAAAGAAAGATACTAA
11	30988948	A	ATTAGTATCTTTCTTTTTTTTTTTTTTTTTTTTTTTTTTTTTTTTTTTTTTTTTTTTTAGTATTTTT	PASS	intron_variant	MODIFIER	PTPRD	481538	transcript	XM_022425395.1	protein_coding	2	c.-545+24139_-545+24140insAAAAATACTAAAAAAAAAAAAAAAAAAAAAAAAAAAAAAAAAAAAAAAAAAAAAGAAAGATACTAA
11	30988948	A	ATTAGTATCTTTCTTTTTTTTTTTTTTTTTTTTTTTTTTTTTTTTTTTTTTTTTTTTTAGTATTTTT	PASS	intron_variant	MODIFIER	PTPRD	481538	transcript	XM_022425396.1	protein_coding	2	c.-545+24139_-545+24140insAAAAATACTAAAAAAAAAAAAAAAAAAAAAAAAAAAAAAAAAAAAAAAAAAAAAGAAAGATACTAA
11	30988948	A	ATTAGTATCTTTCTTTTTTTTTTTTTTTTTTTTTTTTTTTTTTTTTTTTTTTTTTTTTAGTATTTTT	PASS	intron_variant	MODIFIER	PTPRD	481538	transcript	XM_022425397.1	protein_coding	2	c.-545+24139_-545+24140insAAAAATACTAAAAAAAAAAAAAAAAAAAAAAAAAAAAAAAAAAAAAAAAAAAAAGAAAGATACTAA
11	30988948	A	ATTAGTATCTTTCTTTTTTTTTTTTTTTTTTTTTTTTTTTTTTTTTTTTTTTTTTTTTAGTATTTTT	PASS	intron_variant	MODIFIER	PTPRD	481538	transcript	XM_022425399.1	protein_coding	2	c.-545+24139_-545+24140insAAAAATACTAAAAAAAAAAAAAAAAAAAAAAAAAAAAAAAAAAAAAAAAAAAAAGAAAGATACTAA
11	30988948	A	ATTAGTATCTTTCTTTTTTTTTTTTTTTTTTTTTTTTTTTTTTTTTTTTTTTTTTTTTAGTATTTTT	PASS	intron_variant	MODIFIER	PTPRD	481538	transcript	XM_022425401.1	protein_coding	2	c.-545+24139_-545+24140insAAAAATACTAAAAAAAAAAAAAAAAAAAAAAAAAAAAAAAAAAAAAAAAAAAAAGAAAGATACTAA
11	30988948	A	ATTAGTATCTTTCTTTTTTTTTTTTTTTTTTTTTTTTTTTTTTTTTTTTTTTTTTTTTAGTATTTTT	PASS	intron_variant	MODIFIER	PTPRD	481538	transcript	XM_022425402.1	protein_coding	2	c.-545+24139_-545+24140insAAAAATACTAAAAAAAAAAAAAAAAAAAAAAAAAAAAAAAAAAAAAAAAAAAAAGAAAGATACTAA
11	30988948	A	ATTAGTATCTTTCTTTTTTTTTTTTTTTTTTTTTTTTTTTTTTTTTTTTTTTTTTTTTAGTATTTTT	PASS	intron_variant	MODIFIER	PTPRD	481538	transcript	XM_022425403.1	protein_coding	2	c.-545+24139_-545+24140insAAAAATACTAAAAAAAAAAAAAAAAAAAAAAAAAAAAAAAAAAAAAAAAAAAAAGAAAGATACTAA
11	30988948	A	ATTAGTATCTTTCTTTTTTTTTTTTTTTTTTTTTTTTTTTTTTTTTTTTTTTTTTTTTAGTATTTTT	PASS	intron_variant	MODIFIER	PTPRD	481538	transcript	XM_022425404.1	protein_coding	2	c.-545+24139_-545+24140insAAAAATACTAAAAAAAAAAAAAAAAAAAAAAAAAAAAAAAAAAAAAAAAAAAAAGAAAGATACTAA
11	30988948	A	ATTAGTATCTTTCTTTTTTTTTTTTTTTTTTTTTTTTTTTTTTTTTTTTTTTTTTTTTAGTATTTTT	PASS	intron_variant	MODIFIER	PTPRD	481538	transcript	XM_022425381.1	protein_coding	2	c.-545+24139_-545+24140insAAAAATACTAAAAAAAAAAAAAAAAAAAAAAAAAAAAAAAAAAAAAAAAAAAAAGAAAGATACTAA
11	30988948	A	ATTAGTATCTTTCTTTTTTTTTTTTTTTTTTTTTTTTTTTTTTTTTTTTTTTTTTTTTAGTATTTTT	PASS	intron_variant	MODIFIER	PTPRD	481538	transcript	XM_022425382.1	protein_coding	2	c.-545+24139_-545+24140insAAAAATACTAAAAAAAAAAAAAAAAAAAAAAAAAAAAAAAAAAAAAAAAAAAAAGAAAGATACTAA
11	31924610	C	A	GATKstd	intron_variant	MODIFIER	LOC102152527	102152527	transcript	XR_002631416.1	pseudogene	5	n.442+398C>A
11	31924610	C	A	GATKstd	intron_variant	MODIFIER	LOC102152527	102152527	transcript	XR_002631418.1	pseudogene	5	n.442+398C>A
11	31924610	C	A	GATKstd	intron_variant	MODIFIER	LOC102152527	102152527	transcript	XR_002631415.1	pseudogene	5	n.442+398C>A
11	31924610	C	A	GATKstd	intron_variant	MODIFIER	LOC102152527	102152527	transcript	XR_001317358.2	pseudogene	5	n.422+398C>A
11	31924610	C	A	GATKstd	intron_variant	MODIFIER	LOC102152527	102152527	transcript	XR_002631414.1	pseudogene	5	n.442+398C>A
11	31924610	C	A	GATKstd	intron_variant	MODIFIER	LOC102152527	102152527	transcript	XR_002631417.1	pseudogene	5	n.393+398C>A
11	31924610	C	A	GATKstd	intron_variant	MODIFIER	LOC102152527	102152527	transcript	XR_002631419.1	pseudogene	5	n.427+398C>A
11	31924610	C	A	GATKstd	intron_variant	MODIFIER	LOC102152527	102152527	transcript	XR_293560.2	pseudogene	5	n.378+398C>A
11	32268880	T	TTTTTTTACTTGATAATCACTATAATATCAGCAATATACCTTTTTCTGACCTCTGCCAGAAAAATTAGATATGGGCATATTTAAATTTCTTA	PASS	intergenic_region	MODIFIER	LOC481540-LOC100684799	481540-100684799	intergenic_region	481540-100684799		-1	n.32268880_32268881insTTTTTTACTTGATAATCACTATAATATCAGCAATATACCTTTTTCTGACCTCTGCCAGAAAAATTAGATATGGGCATATTTAAATTTCTTA
11	32693302	A	C	GATKstd	intergenic_region	MODIFIER	LOC100684799-LOC100856273	100684799-100856273	intergenic_region	100684799-100856273		-1	n.32693302A>C
11	32693321	A	G	GATKstd	intergenic_region	MODIFIER	LOC100684799-LOC100856273	100684799-100856273	intergenic_region	100684799-100856273		-1	n.32693321A>G
11	37412980	T	TTTTTATTTATTTATGATAGTCACAGAGAGAGAAA	PASS	intron_variant	MODIFIER	CNTLN	481548	transcript	XM_014117985.2	protein_coding	18	c.3066+3468_3066+3469insTTTTATTTATTTATGATAGTCACAGAGAGAGAAA
11	40033676	A	AGCGGTTTGGCGCCTGTCTTTGGCCCAGGGCGCG	PASS	intron_variant	MODIFIER	MLLT3	481556	transcript	XM_538677.6	protein_coding	4	c.420+3537_420+3538insCGCGCCCTGGGCCAAAGACAGGCGCCAAACCGC
11	40033676	A	AGCGGTTTGGCGCCTGTCTTTGGCCCAGGGCGCG	PASS	intron_variant	MODIFIER	MLLT3	481556	transcript	XM_014117789.2	protein_coding	4	c.411+3537_411+3538insCGCGCCCTGGGCCAAAGACAGGCGCCAAACCGC
11	40033676	A	AGCGGTTTGGCGCCTGTCTTTGGCCCAGGGCGCG	PASS	intron_variant	MODIFIER	MLLT3	481556	transcript	XM_022425476.1	protein_coding	4	c.420+3537_420+3538insCGCGCCCTGGGCCAAAGACAGGCGCCAAACCGC
11	43288984	TA	T	PASS	intron_variant	MODIFIER	LOC111098069	111098069	transcript	XR_002631492.1	pseudogene	1	n.121+12729delA
11	56162215	G	T	GATKstd	non_coding_transcript_exon_variant	MODIFIER	LOC111098105	111098105	transcript	XR_002631622.1	pseudogene	1	n.456C>A
11	56672673	C	G	GATKstd	intron_variant	MODIFIER	LOC100684471	100684471	transcript	100684471	pseudogene	1	n.23-1140G>C
11	58926052	A	C	GATKstd	intron_variant	MODIFIER	LOC111097954	111097954	transcript	XR_002631189.1	pseudogene	2	n.218-8571A>C
11	60047699	A	T	GATKstd	downstream_gene_variant	MODIFIER	LOC111097955	111097955	transcript	XR_002631190.1	pseudogene	-1	n.*312T>A
11	60047699	A	T	GATKstd	intergenic_region	MODIFIER	LOC106559525-LOC111097955	106559525-111097955	intergenic_region	106559525-111097955		-1	n.60047699A>T
11	63639346	T	G	GATKstd	intergenic_region	MODIFIER	LOC102152238-LOC102152291	102152238-102152291	intergenic_region	102152238-102152291		-1	n.63639346T>G
11	63781220	C	T	GATKstd	intergenic_region	MODIFIER	LOC102152238-LOC102152291	102152238-102152291	intergenic_region	102152238-102152291		-1	n.63781220C>T
11	64778236	C	T	PASS	intergenic_region	MODIFIER	LOC111098129-LOC100683840	111098129-100683840	intergenic_region	111098129-100683840		-1	n.64778236C>T
11	64917001	G	C	GATKstd	intron_variant	MODIFIER	AKAP2	481660	transcript	XM_022424914.1	protein_coding	3	c.126+7243G>C
11	64917001	G	C	GATKstd	intron_variant	MODIFIER	AKAP2	481660	transcript	XM_022424916.1	protein_coding	3	c.126+7243G>C
11	64917001	G	C	GATKstd	intron_variant	MODIFIER	AKAP2	481660	transcript	XM_022424915.1	protein_coding	3	c.126+7243G>C
11	64917001	G	C	GATKstd	intron_variant	MODIFIER	AKAP2	481660	transcript	XM_005626411.3	protein_coding	3	c.126+7243G>C
11	64917001	G	C	GATKstd	intron_variant	MODIFIER	AKAP2	481660	transcript	XM_005626413.3	protein_coding	3	c.126+7243G>C
11	64917001	G	C	GATKstd	intron_variant	MODIFIER	AKAP2	481660	transcript	XM_022424917.1	protein_coding	3	c.126+7243G>C
11	64917001	G	C	GATKstd	intron_variant	MODIFIER	AKAP2	481660	transcript	NM_001204899.1	protein_coding	2	c.126+7243G>C
11	64917024	C	A	GATKstd	intron_variant	MODIFIER	AKAP2	481660	transcript	XM_022424914.1	protein_coding	3	c.126+7266C>A
11	64917024	C	A	GATKstd	intron_variant	MODIFIER	AKAP2	481660	transcript	XM_022424916.1	protein_coding	3	c.126+7266C>A
11	64917024	C	A	GATKstd	intron_variant	MODIFIER	AKAP2	481660	transcript	XM_022424915.1	protein_coding	3	c.126+7266C>A
11	64917024	C	A	GATKstd	intron_variant	MODIFIER	AKAP2	481660	transcript	XM_005626411.3	protein_coding	3	c.126+7266C>A
11	64917024	C	A	GATKstd	intron_variant	MODIFIER	AKAP2	481660	transcript	XM_005626413.3	protein_coding	3	c.126+7266C>A
11	64917024	C	A	GATKstd	intron_variant	MODIFIER	AKAP2	481660	transcript	XM_022424917.1	protein_coding	3	c.126+7266C>A
11	64917024	C	A	GATKstd	intron_variant	MODIFIER	AKAP2	481660	transcript	NM_001204899.1	protein_coding	2	c.126+7266C>A
11	65134482	G	A	GATKstd	intron_variant	MODIFIER	AKAP2	481660	transcript	XM_022424914.1	protein_coding	9	c.1279-8825G>A
11	65134482	G	A	GATKstd	intron_variant	MODIFIER	AKAP2	481660	transcript	XM_022424916.1	protein_coding	9	c.1279-8825G>A
11	65134482	G	A	GATKstd	intron_variant	MODIFIER	AKAP2	481660	transcript	XM_022424915.1	protein_coding	9	c.1279-8825G>A
11	65134482	G	A	GATKstd	intron_variant	MODIFIER	AKAP2	481660	transcript	XM_005626411.3	protein_coding	8	c.1177-8825G>A
11	65134482	G	A	GATKstd	intron_variant	MODIFIER	AKAP2	481660	transcript	XM_005626413.3	protein_coding	7	c.481-8825G>A
11	65134482	G	A	GATKstd	intron_variant	MODIFIER	AKAP2	481660	transcript	XM_022424917.1	protein_coding	8	c.583-8825G>A
11	65134482	G	A	GATKstd	intron_variant	MODIFIER	AKAP2	481660	transcript	XM_005626416.3	protein_coding	1	c.-111-8825G>A
11	65134482	G	A	GATKstd	intron_variant	MODIFIER	AKAP2	481660	transcript	XM_005626417.3	protein_coding	1	c.-112+1189G>A
11	65135228	G	A	PASS	intron_variant	MODIFIER	AKAP2	481660	transcript	XM_022424914.1	protein_coding	9	c.1279-8079G>A
11	65135228	G	A	PASS	intron_variant	MODIFIER	AKAP2	481660	transcript	XM_022424916.1	protein_coding	9	c.1279-8079G>A
11	65135228	G	A	PASS	intron_variant	MODIFIER	AKAP2	481660	transcript	XM_022424915.1	protein_coding	9	c.1279-8079G>A
11	65135228	G	A	PASS	intron_variant	MODIFIER	AKAP2	481660	transcript	XM_005626411.3	protein_coding	8	c.1177-8079G>A
11	65135228	G	A	PASS	intron_variant	MODIFIER	AKAP2	481660	transcript	XM_005626413.3	protein_coding	7	c.481-8079G>A
11	65135228	G	A	PASS	intron_variant	MODIFIER	AKAP2	481660	transcript	XM_022424917.1	protein_coding	8	c.583-8079G>A
11	65135228	G	A	PASS	intron_variant	MODIFIER	AKAP2	481660	transcript	XM_005626416.3	protein_coding	1	c.-111-8079G>A
11	65135228	G	A	PASS	intron_variant	MODIFIER	AKAP2	481660	transcript	XM_005626417.3	protein_coding	1	c.-112+1935G>A
11	65143044	G	A	PASS	intron_variant	MODIFIER	AKAP2	481660	transcript	XM_022424914.1	protein_coding	9	c.1279-263G>A
11	65143044	G	A	PASS	intron_variant	MODIFIER	AKAP2	481660	transcript	XM_022424916.1	protein_coding	9	c.1279-263G>A
11	65143044	G	A	PASS	intron_variant	MODIFIER	AKAP2	481660	transcript	XM_022424915.1	protein_coding	9	c.1279-263G>A
11	65143044	G	A	PASS	intron_variant	MODIFIER	AKAP2	481660	transcript	XM_005626411.3	protein_coding	8	c.1177-263G>A
11	65143044	G	A	PASS	intron_variant	MODIFIER	AKAP2	481660	transcript	XM_005626413.3	protein_coding	7	c.481-263G>A
11	65143044	G	A	PASS	intron_variant	MODIFIER	AKAP2	481660	transcript	XM_022424917.1	protein_coding	8	c.583-263G>A
11	65143044	G	A	PASS	intron_variant	MODIFIER	AKAP2	481660	transcript	XM_005626416.3	protein_coding	1	c.-111-263G>A
11	65143044	G	A	PASS	intron_variant	MODIFIER	AKAP2	481660	transcript	XM_005626417.3	protein_coding	1	c.-111-263G>A
11	65143627	G	A	PASS	synonymous_variant	LOW	AKAP2	481660	transcript	XM_022424914.1	protein_coding	10	c.1599G>A	p.Pro533Pro
11	65143627	G	A	PASS	synonymous_variant	LOW	AKAP2	481660	transcript	XM_022424916.1	protein_coding	10	c.1599G>A	p.Pro533Pro
11	65143627	G	A	PASS	synonymous_variant	LOW	AKAP2	481660	transcript	XM_022424915.1	protein_coding	10	c.1599G>A	p.Pro533Pro
11	65143627	G	A	PASS	synonymous_variant	LOW	AKAP2	481660	transcript	XM_005626411.3	protein_coding	9	c.1497G>A	p.Pro499Pro
11	65143627	G	A	PASS	synonymous_variant	LOW	AKAP2	481660	transcript	XM_005626413.3	protein_coding	8	c.801G>A	p.Pro267Pro
11	65143627	G	A	PASS	synonymous_variant	LOW	AKAP2	481660	transcript	XM_022424917.1	protein_coding	9	c.903G>A	p.Pro301Pro
11	65143627	G	A	PASS	synonymous_variant	LOW	AKAP2	481660	transcript	XM_005626416.3	protein_coding	2	c.210G>A	p.Pro70Pro
11	65143627	G	A	PASS	synonymous_variant	LOW	AKAP2	481660	transcript	XM_005626417.3	protein_coding	2	c.210G>A	p.Pro70Pro
11	65143821	C	T	PASS	missense_variant	MODERATE	AKAP2	481660	transcript	XM_022424914.1	protein_coding	10	c.1793C>T	p.Ala598Val
11	65143821	C	T	PASS	missense_variant	MODERATE	AKAP2	481660	transcript	XM_022424916.1	protein_coding	10	c.1793C>T	p.Ala598Val
11	65143821	C	T	PASS	missense_variant	MODERATE	AKAP2	481660	transcript	XM_022424915.1	protein_coding	10	c.1793C>T	p.Ala598Val
11	65143821	C	T	PASS	missense_variant	MODERATE	AKAP2	481660	transcript	XM_005626411.3	protein_coding	9	c.1691C>T	p.Ala564Val
11	65143821	C	T	PASS	missense_variant	MODERATE	AKAP2	481660	transcript	XM_005626413.3	protein_coding	8	c.995C>T	p.Ala332Val
11	65143821	C	T	PASS	missense_variant	MODERATE	AKAP2	481660	transcript	XM_022424917.1	protein_coding	9	c.1097C>T	p.Ala366Val
11	65143821	C	T	PASS	missense_variant	MODERATE	AKAP2	481660	transcript	XM_005626416.3	protein_coding	2	c.404C>T	p.Ala135Val
11	65143821	C	T	PASS	missense_variant	MODERATE	AKAP2	481660	transcript	XM_005626417.3	protein_coding	2	c.404C>T	p.Ala135Val
11	65156054	G	A	PASS	intron_variant	MODIFIER	AKAP2	481660	transcript	XM_022424914.1	protein_coding	10	c.3740-7794G>A
11	65156054	G	A	PASS	intron_variant	MODIFIER	AKAP2	481660	transcript	XM_022424916.1	protein_coding	10	c.3739+10287G>A
11	65156054	G	A	PASS	intron_variant	MODIFIER	AKAP2	481660	transcript	XM_022424915.1	protein_coding	10	c.3740-7794G>A
11	65156054	G	A	PASS	intron_variant	MODIFIER	AKAP2	481660	transcript	XM_005626411.3	protein_coding	9	c.3638-7794G>A
11	65156054	G	A	PASS	intron_variant	MODIFIER	AKAP2	481660	transcript	XM_005626413.3	protein_coding	8	c.2942-7794G>A
11	65156054	G	A	PASS	intron_variant	MODIFIER	AKAP2	481660	transcript	XM_022424917.1	protein_coding	9	c.3044-7794G>A
11	65156054	G	A	PASS	intron_variant	MODIFIER	AKAP2	481660	transcript	XM_005626416.3	protein_coding	2	c.2351-7794G>A
11	65156054	G	A	PASS	intron_variant	MODIFIER	AKAP2	481660	transcript	XM_005626417.3	protein_coding	2	c.2351-7794G>A
11	65156467	G	A	PASS	intron_variant	MODIFIER	AKAP2	481660	transcript	XM_022424914.1	protein_coding	10	c.3740-7381G>A
11	65156467	G	A	PASS	intron_variant	MODIFIER	AKAP2	481660	transcript	XM_022424916.1	protein_coding	10	c.3739+10700G>A
11	65156467	G	A	PASS	intron_variant	MODIFIER	AKAP2	481660	transcript	XM_022424915.1	protein_coding	10	c.3740-7381G>A
11	65156467	G	A	PASS	intron_variant	MODIFIER	AKAP2	481660	transcript	XM_005626411.3	protein_coding	9	c.3638-7381G>A
11	65156467	G	A	PASS	intron_variant	MODIFIER	AKAP2	481660	transcript	XM_005626413.3	protein_coding	8	c.2942-7381G>A
11	65156467	G	A	PASS	intron_variant	MODIFIER	AKAP2	481660	transcript	XM_022424917.1	protein_coding	9	c.3044-7381G>A
11	65156467	G	A	PASS	intron_variant	MODIFIER	AKAP2	481660	transcript	XM_005626416.3	protein_coding	2	c.2351-7381G>A
11	65156467	G	A	PASS	intron_variant	MODIFIER	AKAP2	481660	transcript	XM_005626417.3	protein_coding	2	c.2351-7381G>A
11	65158282	A	G	PASS	intron_variant	MODIFIER	AKAP2	481660	transcript	XM_022424914.1	protein_coding	10	c.3740-5566A>G
11	65158282	A	G	PASS	intron_variant	MODIFIER	AKAP2	481660	transcript	XM_022424916.1	protein_coding	10	c.3739+12515A>G
11	65158282	A	G	PASS	intron_variant	MODIFIER	AKAP2	481660	transcript	XM_022424915.1	protein_coding	10	c.3740-5566A>G
11	65158282	A	G	PASS	intron_variant	MODIFIER	AKAP2	481660	transcript	XM_005626411.3	protein_coding	9	c.3638-5566A>G
11	65158282	A	G	PASS	intron_variant	MODIFIER	AKAP2	481660	transcript	XM_005626413.3	protein_coding	8	c.2942-5566A>G
11	65158282	A	G	PASS	intron_variant	MODIFIER	AKAP2	481660	transcript	XM_022424917.1	protein_coding	9	c.3044-5566A>G
11	65158282	A	G	PASS	intron_variant	MODIFIER	AKAP2	481660	transcript	XM_005626416.3	protein_coding	2	c.2351-5566A>G
11	65158282	A	G	PASS	intron_variant	MODIFIER	AKAP2	481660	transcript	XM_005626417.3	protein_coding	2	c.2351-5566A>G
11	65783718	A	G	PASS	intron_variant	MODIFIER	LPAR1	474800	transcript	XM_005626916.3	protein_coding	1	c.-115-15949T>C
11	65783718	A	G	PASS	intron_variant	MODIFIER	LPAR1	474800	transcript	XM_532031.6	protein_coding	1	c.-115-15949T>C
11	65893789	A	G	PASS	intergenic_region	MODIFIER	LOC111097959-LOC111097960	111097959-111097960	intergenic_region	111097959-111097960		-1	n.65893789A>G
11	66619452	C	T	PASS	intron_variant	MODIFIER	SUSD1	481667	transcript	XM_022424939.1	protein_coding	10	c.1324+9980G>A
11	66619452	C	T	PASS	intron_variant	MODIFIER	LOC111097884	111097884	transcript	XR_002631085.1	pseudogene	2	n.599+21754C>T
11	66619452	C	T	PASS	intron_variant	MODIFIER	SUSD1	481667	transcript	XM_022424940.1	protein_coding	10	c.1324+9980G>A
11	66619452	C	T	PASS	intron_variant	MODIFIER	SUSD1	481667	transcript	XM_014117921.2	protein_coding	10	c.1471+9980G>A
11	66619452	C	T	PASS	intron_variant	MODIFIER	SUSD1	481667	transcript	XM_022424941.1	protein_coding	10	c.1471+9980G>A
11	66619452	C	T	PASS	intron_variant	MODIFIER	LOC111097884	111097884	transcript	XR_002631084.1	pseudogene	2	n.594+21754C>T
11	69642078	C	A	GATKstd	intergenic_region	MODIFIER	LOC111097890-LOC111097963	111097890-111097963	intergenic_region	111097890-111097963		-1	n.69642078C>A
11	70102913	G	T	PASS	intron_variant	MODIFIER	PAPPA	481692	transcript	XM_022425031.1	protein_coding	9	c.2665+8387G>T
11	71096797	C	T	GATKstd	intergenic_region	MODIFIER	ASTN2-TLR4	481693-403417	intergenic_region	481693-403417		-1	n.71096797C>T
11	71781897	G	A	GATKstd	intergenic_region	MODIFIER	LOC102152863-BRINP1	102152863-481694	intergenic_region	102152863-481694		-1	n.71781897G>A
11	71974566	C	A	GATKstd	intergenic_region	MODIFIER	LOC102152863-BRINP1	102152863-481694	intergenic_region	102152863-481694		-1	n.71974566C>A
11	72283563	C	T	GATKstd	intergenic_region	MODIFIER	LOC102152863-BRINP1	102152863-481694	intergenic_region	102152863-481694		-1	n.72283563C>T
11	72777523	GCCTGCCTCGGGGACTC	G	PASS	intron_variant	MODIFIER	BRINP1	481694	transcript	XM_022425001.1	protein_coding	1	c.-51+17079_-51+17094delGAGTCCCCGAGGCAGG
11	72793096	C	T	GATKstd	intron_variant	MODIFIER	BRINP1	481694	transcript	XM_022425001.1	protein_coding	1	c.-51+1522G>A
11	72815229	G	A	GATKstd	downstream_gene_variant	MODIFIER	LOC102152979	102152979	transcript	XR_293641.2	pseudogene	-1	n.*4629C>T
11	72815229	G	A	GATKstd	intergenic_region	MODIFIER	BRINP1-LOC102152979	481694-102152979	intergenic_region	481694-102152979		-1	n.72815229G>A
11	73006150	T	A	PASS	intergenic_region	MODIFIER	LOC111097896-LOC100686421	111097896-100686421	intergenic_region	111097896-100686421		-1	n.73006150T>A
11	73084554	G	C	GATKstd	intergenic_region	MODIFIER	LOC102153086-LOC111097897	102153086-111097897	intergenic_region	102153086-111097897		-1	n.73084554G>C
11	73275996	C	T	GATKstd	intergenic_region	MODIFIER	LOC102153086-LOC111097897	102153086-111097897	intergenic_region	102153086-111097897		-1	n.73275996C>T
11	73312973	C	T	GATKstd	intergenic_region	MODIFIER	LOC111097897-CDK5RAP2	111097897-612705	intergenic_region	111097897-612705		-1	n.73312973C>T
11	73409910	CAGGAGCATGTGA	C	PASS	intergenic_region	MODIFIER	LOC111097897-CDK5RAP2	111097897-612705	intergenic_region	111097897-612705		-1	n.73409911_73409922delAGGAGCATGTGA
11	73561508	C	CTTTTTTTTTTTTTTTTTTTTTAATTTTTTTTTTATTTTTTATTTATTTATGATAGTTA	PASS	intron_variant	MODIFIER	CDK5RAP2	612705	transcript	XM_014117959.2	protein_coding	31	c.4847-675_4847-674insTAACTATCATAAATAAATAAAAAATAAAAAAAAAATTAAAAAAAAAAAAAAAAAAAAA
11	73561508	C	CTTTTTTTTTTTTTTTTTTTTTAATTTTTTTTTTATTTTTTATTTATTTATGATAGTTA	PASS	intron_variant	MODIFIER	CDK5RAP2	612705	transcript	XM_014117961.2	protein_coding	30	c.4763-675_4763-674insTAACTATCATAAATAAATAAAAAATAAAAAAAAAATTAAAAAAAAAAAAAAAAAAAAA
11	73561508	C	CTTTTTTTTTTTTTTTTTTTTTAATTTTTTTTTTATTTTTTATTTATTTATGATAGTTA	PASS	intron_variant	MODIFIER	CDK5RAP2	612705	transcript	XM_022425004.1	protein_coding	28	c.4421-675_4421-674insTAACTATCATAAATAAATAAAAAATAAAAAAAAAATTAAAAAAAAAAAAAAAAAAAAA
11	73561508	C	CTTTTTTTTTTTTTTTTTTTTTAATTTTTTTTTTATTTTTTATTTATTTATGATAGTTA	PASS	intron_variant	MODIFIER	CDK5RAP2	612705	transcript	XM_014117960.2	protein_coding	31	c.4811-675_4811-674insTAACTATCATAAATAAATAAAAAATAAAAAAAAAATTAAAAAAAAAAAAAAAAAAAAA
12	428771	T	TGGGATCCCTGGGTGGCGCAGCG	PASS	intron_variant	MODIFIER	PPP1R10	481705	transcript	XM_843307.5	protein_coding	2	c.-11-962_-11-961insCGCTGCGCCACCCAGGGATCCC
12	428774	T	TTGGCGCCTGCCTTTGGCCC	PASS	intron_variant	MODIFIER	PPP1R10	481705	transcript	XM_843307.5	protein_coding	2	c.-11-965_-11-964insGGGCCAAAGGCAGGCGCCA
12	428775	A	AGGGCGCGATCC	PASS	intron_variant	MODIFIER	PPP1R10	481705	transcript	XM_843307.5	protein_coding	2	c.-11-966_-11-965insGGATCGCGCCC
12	1579323	C	CTCTCATTTCCCGAGGGCTGTACATCTGGCCTCCCGCAAGGTTATCCCCGTAGCCCCCTGG	GATKIndelStd	splice_acceptor_variant&intron_variant	HIGH	PBX2	607695	transcript	XM_845159.4	protein_coding	8	c.1021-1_1021insCCAGGGGGCTACGGGGATAACCTTGCGGGAGGCCAGATGTACAGCCCTCGGGAAATGAGA
12	1579323	C	CTCTCATTTCCCGAGGGCTGTACATCTGGCCTCCCGCAAGGTTATCCCCGTAGCCCCCTGG	GATKIndelStd	upstream_gene_variant	MODIFIER	AGER	403168	transcript	NM_001048081.2	protein_coding	-1	c.-2213_-2212insCCAGGGGGCTACGGGGATAACCTTGCGGGAGGCCAGATGTACAGCCCTCGGGAAATGAGA
12	1579323	C	CTCTCATTTCCCGAGGGCTGTACATCTGGCCTCCCGCAAGGTTATCCCCGTAGCCCCCTGG	GATKIndelStd	upstream_gene_variant	MODIFIER	AGER	403168	transcript	XR_293655.3	pseudogene	-1	n.-1914_-1913insCCAGGGGGCTACGGGGATAACCTTGCGGGAGGCCAGATGTACAGCCCTCGGGAAATGAGA
12	1579323	C	CTCTCATTTCCCGAGGGCTGTACATCTGGCCTCCCGCAAGGTTATCCCCGTAGCCCCCTGG	GATKIndelStd	downstream_gene_variant	MODIFIER	GPSM3	607687	transcript	XM_844458.5	protein_coding	-1	c.*4736_*4737insCCAGGGGGCTACGGGGATAACCTTGCGGGAGGCCAGATGTACAGCCCTCGGGAAATGAGA
12	1579323	C	CTCTCATTTCCCGAGGGCTGTACATCTGGCCTCCCGCAAGGTTATCCCCGTAGCCCCCTGG	GATKIndelStd	downstream_gene_variant	MODIFIER	RNF5	474858	transcript	XM_022425869.1	protein_coding	-1	c.*4231_*4232insTCTCATTTCCCGAGGGCTGTACATCTGGCCTCCCGCAAGGTTATCCCCGTAGCCCCCTGG
12	1579323	C	CTCTCATTTCCCGAGGGCTGTACATCTGGCCTCCCGCAAGGTTATCCCCGTAGCCCCCTGG	GATKIndelStd	downstream_gene_variant	MODIFIER	GPSM3	607687	transcript	XM_014118355.2	protein_coding	-1	c.*4573_*4574insCCAGGGGGCTACGGGGATAACCTTGCGGGAGGCCAGATGTACAGCCCTCGGGAAATGAGA
12	2026474	C	G	GATKstd	intron_variant	MODIFIER	LOC100686815	100686815	transcript	100686815	pseudogene	1	n.77+2695C>G
12	2026475	A	G	GATKstd	intron_variant	MODIFIER	LOC100686815	100686815	transcript	100686815	pseudogene	1	n.77+2696A>G
12	2026521	G	C	GATKstd	intron_variant	MODIFIER	LOC100686815	100686815	transcript	100686815	pseudogene	1	n.77+2742G>C
12	4004908	A	ACT	PASS	intron_variant	MODIFIER	SNRPC	608109	transcript	XM_022425755.1	protein_coding	3	c.198-1060_198-1059insCT
12	4004908	A	ACT	PASS	intron_variant	MODIFIER	SNRPC	608109	transcript	NM_001313863.1	protein_coding	3	c.161-1060_161-1059insCT
12	4004911	G	GGC	PASS	intron_variant	MODIFIER	SNRPC	608109	transcript	XM_022425755.1	protein_coding	3	c.198-1057_198-1056insGC
12	4004911	G	GGC	PASS	intron_variant	MODIFIER	SNRPC	608109	transcript	NM_001313863.1	protein_coding	3	c.161-1057_161-1056insGC
12	6981899	A	ATTTTATTTTATTTTTATTTTTTTTTTTAATTTTTATTTATTTATGATAGTCACAGAGAGAGAGAG	PASS	intron_variant	MODIFIER	ZFAND3	481776	transcript	XM_014118409.2	protein_coding	3	c.142+28833_142+28834insTTTTATTTTATTTTTATTTTTTTTTTTAATTTTTATTTATTTATGATAGTCACAGAGAGAGAGAG
12	6981899	A	ATTTTATTTTATTTTTATTTTTTTTTTTAATTTTTATTTATTTATGATAGTCACAGAGAGAGAGAG	PASS	intron_variant	MODIFIER	ZFAND3	481776	transcript	XM_022426011.1	protein_coding	2	c.28+58113_28+58114insTTTTATTTTATTTTTATTTTTTTTTTTAATTTTTATTTATTTATGATAGTCACAGAGAGAGAGAG
12	6981899	A	ATTTTATTTTATTTTTATTTTTTTTTTTAATTTTTATTTATTTATGATAGTCACAGAGAGAGAGAG	PASS	intron_variant	MODIFIER	ZFAND3	481776	transcript	XM_538897.6	protein_coding	2	c.112+58113_112+58114insTTTTATTTTATTTTTATTTTTTTTTTTAATTTTTATTTATTTATGATAGTCACAGAGAGAGAGAG
12	15603886	A	AATTTT	PASS	intron_variant	MODIFIER	CD2AP	474928	transcript	XM_022425796.1	protein_coding	4	c.500-885_500-884insATTTT
12	16065117	C	CCTATTTTATTTACAATAACTCTATTTTCATTTGTTCTGGAGATGG	PASS	intron_variant	MODIFIER	PTCHD4	100855423	transcript	XM_003639429.4	protein_coding	1	c.427-22722_427-22721insCCATCTCCAGAACAAATGAAAATAGAGTTATTGTAAATAAAATAG
12	16306792	G	A	PASS	intergenic_region	MODIFIER	LOC111098156-LOC100686422	111098156-100686422	intergenic_region	111098156-100686422		-1	n.16306792G>A
12	21943628	G	T	GATKstd	intergenic_region	MODIFIER	LOC111098292-LOC481849	111098292-481849	intergenic_region	111098292-481849		-1	n.21943628G>T
12	28908210	G	T	GATKstd	intergenic_region	MODIFIER	EYS-LOC100688886	610772-100688886	intergenic_region	610772-100688886		-1	n.28908210G>T
12	32841190	C	T	GATKstd	intron_variant	MODIFIER	COL9A1	481873	transcript	XM_022426187.1	protein_coding	4	c.300-2296G>A
12	33030984	T	C	GATKstd	missense_variant	MODERATE	FAM135A	474960	transcript	XM_014118105.2	protein_coding	14	c.1129T>C	p.Phe377Leu
12	33030984	T	C	GATKstd	missense_variant	MODERATE	FAM135A	474960	transcript	XM_005627529.3	protein_coding	14	c.1129T>C	p.Phe377Leu
12	33030984	T	C	GATKstd	missense_variant	MODERATE	FAM135A	474960	transcript	XM_848166.5	protein_coding	13	c.1051T>C	p.Phe351Leu
12	33030984	T	C	GATKstd	missense_variant	MODERATE	FAM135A	474960	transcript	XM_862044.5	protein_coding	13	c.1051T>C	p.Phe351Leu
12	33030984	T	C	GATKstd	missense_variant	MODERATE	FAM135A	474960	transcript	XM_022426188.1	protein_coding	14	c.1129T>C	p.Phe377Leu
12	33030984	T	C	GATKstd	missense_variant	MODERATE	FAM135A	474960	transcript	XM_022426189.1	protein_coding	13	c.994T>C	p.Phe332Leu
12	33030984	T	C	GATKstd	missense_variant	MODERATE	FAM135A	474960	transcript	XM_014118108.2	protein_coding	13	c.1129T>C	p.Phe377Leu
12	33030984	T	C	GATKstd	missense_variant	MODERATE	FAM135A	474960	transcript	XM_022426190.1	protein_coding	5	c.295T>C	p.Phe99Leu
12	33030984	T	C	GATKstd	missense_variant	MODERATE	FAM135A	474960	transcript	XM_022426191.1	protein_coding	3	c.139T>C	p.Phe47Leu
12	35962349	G	A	GATKstd	intron_variant	MODIFIER	LOC111098319	111098319	transcript	XR_002632013.1	pseudogene	2	n.407-3834C>T
12	35962349	G	A	GATKstd	intron_variant	MODIFIER	LOC111098319	111098319	transcript	XR_002632014.1	pseudogene	1	n.225-3834C>T
12	37006954	T	TTTTTTTTTTTTTTTTTTTTTTAATATTTTTTTTAATTTTTATTTATTTATGA	PASS	intron_variant	MODIFIER	FILIP1	481882	transcript	XM_005627537.3	protein_coding	2	c.277-454_277-453insTCATAAATAAATAAAAATTAAAAAAAATATTAAAAAAAAAAAAAAAAAAAAA
12	37006954	T	TTTTTTTTTTTTTTTTTTTTTTAATATTTTTTTTAATTTTTATTTATTTATGA	PASS	intron_variant	MODIFIER	FILIP1	481882	transcript	XM_022426258.1	protein_coding	2	c.277-454_277-453insTCATAAATAAATAAAAATTAAAAAAAATATTAAAAAAAAAAAAAAAAAAAAA
12	37006954	T	TTTTTTTTTTTTTTTTTTTTTTAATATTTTTTTTAATTTTTATTTATTTATGA	PASS	intron_variant	MODIFIER	FILIP1	481882	transcript	XM_539003.6	protein_coding	2	c.277-454_277-453insTCATAAATAAATAAAAATTAAAAAAAATATTAAAAAAAAAAAAAAAAAAAAA
12	37006954	T	TTTTTTTTTTTTTTTTTTTTTTAATATTTTTTTTAATTTTTATTTATTTATGA	PASS	intron_variant	MODIFIER	FILIP1	481882	transcript	XM_022426259.1	protein_coding	2	c.322-454_322-453insTCATAAATAAATAAAAATTAAAAAAAATATTAAAAAAAAAAAAAAAAAAAAA
12	37511508	T	TTTTTTTTTTTAAATTTTTATTTATTTATGATAGTCACAGAG	PASS	intron_variant	MODIFIER	IMPG1	481885	transcript	XM_022426267.1	protein_coding	14	c.2220-2288_2220-2287insCTCTGTGACTATCATAAATAAATAAAAATTTAAAAAAAAAA
12	38999706	A	G	GATKstd	intron_variant	MODIFIER	MEI4	102153459	transcript	XM_005627549.3	protein_coding	4	c.901-23898A>G
12	38999706	A	G	GATKstd	intron_variant	MODIFIER	MEI4	102153459	transcript	XM_014118116.2	protein_coding	3	c.769-23898A>G
12	38999706	A	G	GATKstd	intron_variant	MODIFIER	MEI4	102153459	transcript	XM_014118115.2	protein_coding	4	c.901-23898A>G
12	39217699	T	TC	PASS	intergenic_region	MODIFIER	LOC100686404-LOC611288	100686404-611288	intergenic_region	100686404-611288		-1	n.39217699_39217700insC
12	40189937	T	G	GATKstd	intron_variant	MODIFIER	LOC111098329	111098329	transcript	XR_002632026.1	pseudogene	2	n.287+18973T>G
12	41522099	A	G	GATKstd	intergenic_region	MODIFIER	LOC111098334-LOC100686402	111098334-100686402	intergenic_region	111098334-100686402		-1	n.41522099A>G
12	42040738	T	A	PASS	intergenic_region	MODIFIER	LOC111098335-LOC111098337	111098335-111098337	intergenic_region	111098335-111098337		-1	n.42040738T>A
12	42330784	A	C	GATKstd	intergenic_region	MODIFIER	FAM46A-LOC111098173	481896-111098173	intergenic_region	481896-111098173		-1	n.42330784A>C
12	42491419	A	AGGGATCCCTGGGTGGCGCAGCGGTTTGGCGCCTGCCTTTGGCCCAGGGCGCGATCCTGGAG	PASS	intergenic_region	MODIFIER	LOC111098173-IBTK	111098173-481897	intergenic_region	111098173-481897		-1	n.42491419_42491420insGGGATCCCTGGGTGGCGCAGCGGTTTGGCGCCTGCCTTTGGCCCAGGGCGCGATCCTGGAG
12	48933591	G	A	GATKstd	upstream_gene_variant	MODIFIER	LOC102156150	102156150	transcript	XR_002632078.1	pseudogene	-1	n.-3796G>A
12	48933591	G	A	GATKstd	upstream_gene_variant	MODIFIER	LOC102156150	102156150	transcript	XR_002632076.1	pseudogene	-1	n.-3796G>A
12	48933591	G	A	GATKstd	upstream_gene_variant	MODIFIER	LOC102156150	102156150	transcript	XR_002632077.1	pseudogene	-1	n.-3796G>A
12	48933591	G	A	GATKstd	intron_variant	MODIFIER	MDN1	474995	transcript	XM_005627635.3	protein_coding	38	c.5671-361C>T
12	48933591	G	A	GATKstd	intron_variant	MODIFIER	MDN1	474995	transcript	XM_005627636.3	protein_coding	38	c.5671-361C>T
12	49399300	G	A	PASS	intergenic_region	MODIFIER	BACH2-LOC111098356	481923-111098356	intergenic_region	481923-111098356		-1	n.49399300G>A
12	53220015	T	TTTTTTTTTTTTTTTAA	PASS	intergenic_region	MODIFIER	LOC111098366-LOC111098177	111098366-111098177	intergenic_region	111098366-111098177		-1	n.53220015_53220016insTTTTTTTTTTTTTTAA
12	53220017	T	TTTTTATTTATTTATGATAGTCA	PASS	intergenic_region	MODIFIER	LOC111098366-LOC111098177	111098366-111098177	intergenic_region	111098366-111098177		-1	n.53220017_53220018insTTTTATTTATTTATGATAGTCA
12	55091167	A	C	GATKstd	intergenic_region	MODIFIER	FHL5-LOC100688391	475000-100688391	intergenic_region	475000-100688391		-1	n.55091167A>C
12	55091196	A	C	GATKstd	intergenic_region	MODIFIER	FHL5-LOC100688391	475000-100688391	intergenic_region	475000-100688391		-1	n.55091196A>C
12	55293786	A	ATGGGATCCCTGGATGGCGCAGCGGTTTGGCGCCTGCCTTTGGCCCAGGGCGCGATCCTGGAGACCCGGG	PASS	intergenic_region	MODIFIER	GPR63-NDUFAF4	100685057-475001	intergenic_region	100685057-475001		-1	n.55293786_55293787insTGGGATCCCTGGATGGCGCAGCGGTTTGGCGCCTGCCTTTGGCCCAGGGCGCGATCCTGGAGACCCGGG
12	64569341	T	TC	PASS	intron_variant	MODIFIER	PDSS2	481950	transcript	XM_539071.6	protein_coding	1	c.296+50730_296+50731insG
12	64569341	T	TC	PASS	intron_variant	MODIFIER	PDSS2	481950	transcript	XR_293776.3	pseudogene	1	n.577+50730_577+50731insG
12	64569341	T	TC	PASS	intron_variant	MODIFIER	PDSS2	481950	transcript	XM_014118182.2	protein_coding	1	c.296+50730_296+50731insG
12	64569341	T	TC	PASS	intron_variant	MODIFIER	PDSS2	481950	transcript	XM_005627679.3	protein_coding	1	c.296+50730_296+50731insG
12	65075021	G	T	GATKstd	downstream_gene_variant	MODIFIER	LOC102156451	102156451	transcript	102156451	pseudogene	-1	n.*3897C>A
12	65075021	G	T	GATKstd	intron_variant	MODIFIER	LOC111098382	111098382	transcript	XR_002632137.1	pseudogene	1	n.1780+1752C>A
12	66169870	A	AAAGATTTTATTTATTT	PASS	upstream_gene_variant	MODIFIER	C12H6orf183	612235	transcript	XM_005627693.3	protein_coding	-1	c.-5193_-5192insAAGATTTTATTTATTT
12	66169870	A	AAAGATTTTATTTATTT	PASS	upstream_gene_variant	MODIFIER	C12H6orf183	612235	transcript	XR_002632154.1	pseudogene	-1	n.-4185_-4184insAAGATTTTATTTATTT
12	66169870	A	AAAGATTTTATTTATTT	PASS	upstream_gene_variant	MODIFIER	C12H6orf183	612235	transcript	XR_002632155.1	pseudogene	-1	n.-4185_-4184insAAGATTTTATTTATTT
12	66169870	A	AAAGATTTTATTTATTT	PASS	upstream_gene_variant	MODIFIER	C12H6orf183	612235	transcript	XM_022426431.1	protein_coding	-1	c.-5193_-5192insAAGATTTTATTTATTT
12	66169870	A	AAAGATTTTATTTATTT	PASS	upstream_gene_variant	MODIFIER	C12H6orf183	612235	transcript	XM_005627694.3	protein_coding	-1	c.-5193_-5192insAAGATTTTATTTATTT
12	66169870	A	AAAGATTTTATTTATTT	PASS	upstream_gene_variant	MODIFIER	C12H6orf183	612235	transcript	XM_005627695.3	protein_coding	-1	c.-5193_-5192insAAGATTTTATTTATTT
12	66169870	A	AAAGATTTTATTTATTT	PASS	intergenic_region	MODIFIER	LOC102155928-C12H6orf183	102155928-612235	intergenic_region	102155928-612235		-1	n.66169870_66169871insAAGATTTTATTTATTT
12	67012920	T	TTTTTTTTTTTTTTTTTTTTTTTAATTTTTTTTTTATTTATTTATG	PASS	intron_variant	MODIFIER	METTL24	612293	transcript	XM_022426448.1	protein_coding	6	c.254+1220_254+1221insCATAAATAAATAAAAAAAAAATTAAAAAAAAAAAAAAAAAAAAAA
12	67012920	T	TTTTTTTTTTTTTTTTTTTTTTTAATTTTTTTTTTATTTATTTATG	PASS	intron_variant	MODIFIER	METTL24	612293	transcript	XM_022426449.1	protein_coding	1	c.-34-7784_-34-7783insCATAAATAAATAAAAAAAAAATTAAAAAAAAAAAAAAAAAAAAAA
12	68463168	G	A	GATKstd	intergenic_region	MODIFIER	LOC106559589-LOC111098402	106559589-111098402	intergenic_region	106559589-111098402		-1	n.68463168G>A
13	170783	G	A	GATKstd	intron_variant	MODIFIER	MATN2	491431	transcript	XM_022426543.1	protein_coding	2	c.145+10269G>A
13	170783	G	A	GATKstd	intron_variant	MODIFIER	MATN2	491431	transcript	XM_022426545.1	protein_coding	2	c.145+10269G>A
13	170783	G	A	GATKstd	intron_variant	MODIFIER	MATN2	491431	transcript	XM_022426546.1	protein_coding	2	c.145+10269G>A
13	170783	G	A	GATKstd	intron_variant	MODIFIER	MATN2	491431	transcript	XM_022426547.1	protein_coding	2	c.145+10269G>A
13	170783	G	A	GATKstd	intron_variant	MODIFIER	MATN2	491431	transcript	XM_003431776.4	protein_coding	2	c.145+10269G>A
13	170783	G	A	GATKstd	intron_variant	MODIFIER	MATN2	491431	transcript	XM_005627811.3	protein_coding	2	c.145+10269G>A
13	170783	G	A	GATKstd	intron_variant	MODIFIER	MATN2	491431	transcript	XM_548552.6	protein_coding	2	c.145+10269G>A
13	170783	G	A	GATKstd	intron_variant	MODIFIER	MATN2	491431	transcript	XM_022426544.1	protein_coding	2	c.145+10269G>A
13	819315	A	G	GATKstd	intron_variant	MODIFIER	STK3	475045	transcript	XM_532280.6	protein_coding	6	c.684+20124T>C
13	819315	A	G	GATKstd	intron_variant	MODIFIER	STK3	475045	transcript	XM_022426555.1	protein_coding	6	c.684+20124T>C
13	1147565	A	G	GATKstd	intron_variant	MODIFIER	VPS13B	481981	transcript	XM_014118535.2	protein_coding	4	c.413-4559A>G
13	1147565	A	G	GATKstd	intron_variant	MODIFIER	VPS13B	481981	transcript	XM_005627823.3	protein_coding	4	c.413-4559A>G
13	1147565	A	G	GATKstd	intron_variant	MODIFIER	VPS13B	481981	transcript	XM_022426562.1	protein_coding	4	c.413-4559A>G
13	1147565	A	G	GATKstd	intron_variant	MODIFIER	VPS13B	481981	transcript	XR_002632293.1	pseudogene	4	n.579-4559A>G
13	1147565	A	G	GATKstd	intron_variant	MODIFIER	VPS13B	481981	transcript	XM_022426560.1	protein_coding	4	c.413-4559A>G
13	1147565	A	G	GATKstd	intron_variant	MODIFIER	VPS13B	481981	transcript	XM_850840.6	protein_coding	4	c.413-4559A>G
13	1147565	A	G	GATKstd	intron_variant	MODIFIER	VPS13B	481981	transcript	XM_005627819.3	protein_coding	4	c.413-4559A>G
13	1147565	A	G	GATKstd	intron_variant	MODIFIER	VPS13B	481981	transcript	XM_005627820.3	protein_coding	4	c.413-4559A>G
13	1147565	A	G	GATKstd	intron_variant	MODIFIER	VPS13B	481981	transcript	XM_022426558.1	protein_coding	3	c.269-4559A>G
13	1147565	A	G	GATKstd	intron_variant	MODIFIER	VPS13B	481981	transcript	XM_539102.7	protein_coding	4	c.413-4559A>G
13	1147565	A	G	GATKstd	intron_variant	MODIFIER	VPS13B	481981	transcript	XM_022426559.1	protein_coding	2	c.149-4559A>G
13	1803606	C	CTTAGTAATATTAAAAAAAAAAAAAAAAAAAAAAAAAAAAAAAAAAAAAAAAAAAAAAA	PASS	intron_variant	MODIFIER	VPS13B	481981	transcript	XM_014118535.2	protein_coding	54	c.10006-6441_10006-6440insTTAGTAATATTAAAAAAAAAAAAAAAAAAAAAAAAAAAAAAAAAAAAAAAAAAAAAAA
13	1803606	C	CTTAGTAATATTAAAAAAAAAAAAAAAAAAAAAAAAAAAAAAAAAAAAAAAAAAAAAAA	PASS	intron_variant	MODIFIER	VPS13B	481981	transcript	XM_850840.6	protein_coding	54	c.9931-6441_9931-6440insTTAGTAATATTAAAAAAAAAAAAAAAAAAAAAAAAAAAAAAAAAAAAAAAAAAAAAAA
13	1803606	C	CTTAGTAATATTAAAAAAAAAAAAAAAAAAAAAAAAAAAAAAAAAAAAAAAAAAAAAAA	PASS	intron_variant	MODIFIER	VPS13B	481981	transcript	XM_005627819.3	protein_coding	54	c.10003-6441_10003-6440insTTAGTAATATTAAAAAAAAAAAAAAAAAAAAAAAAAAAAAAAAAAAAAAAAAAAAAAA
13	1803606	C	CTTAGTAATATTAAAAAAAAAAAAAAAAAAAAAAAAAAAAAAAAAAAAAAAAAAAAAAA	PASS	intron_variant	MODIFIER	VPS13B	481981	transcript	XM_005627820.3	protein_coding	54	c.10003-6441_10003-6440insTTAGTAATATTAAAAAAAAAAAAAAAAAAAAAAAAAAAAAAAAAAAAAAAAAAAAAAA
13	1803606	C	CTTAGTAATATTAAAAAAAAAAAAAAAAAAAAAAAAAAAAAAAAAAAAAAAAAAAAAAA	PASS	intron_variant	MODIFIER	VPS13B	481981	transcript	XM_022426558.1	protein_coding	53	c.9862-6441_9862-6440insTTAGTAATATTAAAAAAAAAAAAAAAAAAAAAAAAAAAAAAAAAAAAAAAAAAAAAAA
13	1803606	C	CTTAGTAATATTAAAAAAAAAAAAAAAAAAAAAAAAAAAAAAAAAAAAAAAAAAAAAAA	PASS	intron_variant	MODIFIER	VPS13B	481981	transcript	XM_539102.7	protein_coding	54	c.10006-6441_10006-6440insTTAGTAATATTAAAAAAAAAAAAAAAAAAAAAAAAAAAAAAAAAAAAAAAAAAAAAAA
13	1803606	C	CTTAGTAATATTAAAAAAAAAAAAAAAAAAAAAAAAAAAAAAAAAAAAAAAAAAAAAAA	PASS	intron_variant	MODIFIER	VPS13B	481981	transcript	XM_022426559.1	protein_coding	52	c.9742-6441_9742-6440insTTAGTAATATTAAAAAAAAAAAAAAAAAAAAAAAAAAAAAAAAAAAAAAAAAAAAAAA
13	2145277	T	C	GATKstd	intron_variant	MODIFIER	RNF19A	475049	transcript	XM_005627829.3	protein_coding	9	c.1826+158A>G
13	2145277	T	C	GATKstd	intron_variant	MODIFIER	RNF19A	475049	transcript	XM_022426584.1	protein_coding	8	c.1826+158A>G
13	2186354	T	C	GATKstd	intergenic_region	MODIFIER	RNF19A-LOC111098645	475049-111098645	intergenic_region	475049-111098645		-1	n.2186354T>C
13	2865039	C	CAAAAAGATCAAAGGAAAAAAAAAAAAAAAAAAAAAAAAAAAAAAAAAAAAAAAAAAAAAAA	PASS	intergenic_region	MODIFIER	LOC111098493-LOC111098494	111098493-111098494	intergenic_region	111098493-111098494		-1	n.2865039_2865040insAAAAAGATCAAAGGAAAAAAAAAAAAAAAAAAAAAAAAAAAAAAAAAAAAAAAAAAAAAAA
13	3206288	C	T	PASS	downstream_gene_variant	MODIFIER	LOC111098495	111098495	transcript	XR_002632305.1	pseudogene	-1	n.*2011C>T
13	3206288	C	T	PASS	downstream_gene_variant	MODIFIER	LOC111098495	111098495	transcript	XR_002632307.1	pseudogene	-1	n.*2011C>T
13	3206288	C	T	PASS	downstream_gene_variant	MODIFIER	LOC111098495	111098495	transcript	XR_002632306.1	pseudogene	-1	n.*2013C>T
13	3206288	C	T	PASS	intron_variant	MODIFIER	GRHL2	481985	transcript	XM_005627833.3	protein_coding	1	c.20+1276C>T
13	3206288	C	T	PASS	intron_variant	MODIFIER	GRHL2	481985	transcript	XM_005627834.3	protein_coding	1	c.20+1276C>T
13	3206288	C	T	PASS	intron_variant	MODIFIER	GRHL2	481985	transcript	XM_022426590.1	protein_coding	1	c.20+1276C>T
13	3206288	C	T	PASS	intron_variant	MODIFIER	GRHL2	481985	transcript	XM_022426591.1	protein_coding	1	c.-29+1219C>T
13	4426837	G	A	GATKstd	intergenic_region	MODIFIER	AZIN1-LOC111098504	475058-111098504	intergenic_region	475058-111098504		-1	n.4426837G>A
13	5657856	G	GT	PASS	intron_variant	MODIFIER	DPYS	100856067	transcript	XM_003639441.2	protein_coding	1	c.261+1220_261+1221insA
13	6484463	C	CTTTATTCTTTGGTTTTTTTTTTTTTTTTTTTTTTTTTTTTT	PASS	intron_variant	MODIFIER	ZFPM2	481997	transcript	XM_022426499.1	protein_coding	2	c.427+26058_427+26059insTTTATTCTTTGGTTTTTTTTTTTTTTTTTTTTTTTTTTTTT
13	6484463	C	CTTTATTCTTTGGTTTTTTTTTTTTTTTTTTTTTTTTTTTTT	PASS	intron_variant	MODIFIER	ZFPM2	481997	transcript	NM_001128186.1	protein_coding	3	c.292+26058_292+26059insTTTATTCTTTGGTTTTTTTTTTTTTTTTTTTTTTTTTTTTT
13	6484463	C	CTTTATTCTTTGGTTTTTTTTTTTTTTTTTTTTTTTTTTTTT	PASS	intron_variant	MODIFIER	ZFPM2	481997	transcript	XM_022426500.1	protein_coding	1	c.-385+26058_-385+26059insTTTATTCTTTGGTTTTTTTTTTTTTTTTTTTTTTTTTTTTT
13	6484463	C	CTTTATTCTTTGGTTTTTTTTTTTTTTTTTTTTTTTTTTTTT	PASS	intron_variant	MODIFIER	ZFPM2	481997	transcript	XM_022426501.1	protein_coding	1	c.-348+26058_-348+26059insTTTATTCTTTGGTTTTTTTTTTTTTTTTTTTTTTTTTTTTT
13	6484463	C	CTTTATTCTTTGGTTTTTTTTTTTTTTTTTTTTTTTTTTTTT	PASS	intron_variant	MODIFIER	ZFPM2	481997	transcript	XM_022426502.1	protein_coding	1	c.-259+26058_-259+26059insTTTATTCTTTGGTTTTTTTTTTTTTTTTTTTTTTTTTTTTT
13	6589658	A	G	PASS	intron_variant	MODIFIER	ZFPM2	481997	transcript	XM_022426499.1	protein_coding	3	c.546+21883A>G
13	6589658	A	G	PASS	intron_variant	MODIFIER	ZFPM2	481997	transcript	NM_001128186.1	protein_coding	4	c.411+21883A>G
13	6589658	A	G	PASS	intron_variant	MODIFIER	ZFPM2	481997	transcript	XM_022426500.1	protein_coding	4	c.24+21883A>G
13	6589658	A	G	PASS	intron_variant	MODIFIER	ZFPM2	481997	transcript	XM_022426501.1	protein_coding	4	c.24+21883A>G
13	6589658	A	G	PASS	intron_variant	MODIFIER	ZFPM2	481997	transcript	XM_022426502.1	protein_coding	3	c.24+21883A>G
13	6647056	C	T	GATKstd	intron_variant	MODIFIER	ZFPM2	481997	transcript	XM_022426499.1	protein_coding	4	c.658+9386C>T
13	6647056	C	T	GATKstd	intron_variant	MODIFIER	ZFPM2	481997	transcript	NM_001128186.1	protein_coding	5	c.523+9386C>T
13	6647056	C	T	GATKstd	intron_variant	MODIFIER	ZFPM2	481997	transcript	XM_022426500.1	protein_coding	5	c.136+9386C>T
13	6647056	C	T	GATKstd	intron_variant	MODIFIER	ZFPM2	481997	transcript	XM_022426501.1	protein_coding	5	c.136+9386C>T
13	6647056	C	T	GATKstd	intron_variant	MODIFIER	ZFPM2	481997	transcript	XM_022426502.1	protein_coding	4	c.136+9386C>T
13	6647056	C	T	GATKstd	intron_variant	MODIFIER	LOC111098511	111098511	transcript	XR_002632346.1	pseudogene	2	n.474-8950G>A
13	7241511	G	T	GATKstd	intron_variant	MODIFIER	OXR1	481998	transcript	XM_005627862.3	protein_coding	1	c.23+20395G>T
13	7424672	A	T	GATKstd	intron_variant	MODIFIER	OXR1	481998	transcript	XM_003431771.4	protein_coding	2	c.223+63605A>T
13	7424672	A	T	GATKstd	intron_variant	MODIFIER	OXR1	481998	transcript	XM_005627862.3	protein_coding	2	c.220+63605A>T
13	7424672	A	T	GATKstd	intron_variant	MODIFIER	OXR1	481998	transcript	XM_005627865.2	protein_coding	2	c.223+63605A>T
13	7424672	A	T	GATKstd	intron_variant	MODIFIER	OXR1	481998	transcript	XM_005627867.3	protein_coding	1	c.13+6047A>T
13	8370909	GA	G	PASS	intergenic_region	MODIFIER	LOC111098518-LOC111098519	111098518-111098519	intergenic_region	111098518-111098519		-1	n.8370910delA
13	8511803	G	GA	PASS	intergenic_region	MODIFIER	LOC111098519-RSPO2	111098519-482004	intergenic_region	111098519-482004		-1	n.8511803_8511804insA
13	9117131	G	T	PASS	downstream_gene_variant	MODIFIER	EMC2	612810	transcript	XM_022426652.1	protein_coding	-1	c.*2913G>T
13	9117131	G	T	PASS	downstream_gene_variant	MODIFIER	EMC2	612810	transcript	XM_022426653.1	protein_coding	-1	c.*2913G>T
13	9117131	G	T	PASS	intron_variant	MODIFIER	EMC2	612810	transcript	XM_022426654.1	protein_coding	11	c.*2-751G>T
13	9117131	G	T	PASS	intron_variant	MODIFIER	EMC2	612810	transcript	XR_002632366.1	pseudogene	10	n.895+12128G>T
13	9117131	G	T	PASS	intron_variant	MODIFIER	EMC2	612810	transcript	XR_002632367.1	pseudogene	10	n.790+12128G>T
13	11648063	C	T	GATKstd	intron_variant	MODIFIER	LOC111098437	111098437	transcript	XR_002632226.1	pseudogene	1	n.105-5083C>T
13	12809634	TC	T	PASS	intron_variant	MODIFIER	CSMD3	482016	transcript	XM_844967.5	protein_coding	16	c.2677+2545delG
13	12809634	TC	T	PASS	intron_variant	MODIFIER	CSMD3	482016	transcript	XM_014118587.2	protein_coding	15	c.2365+2545delG
13	12809634	TC	T	PASS	intron_variant	MODIFIER	CSMD3	482016	transcript	XM_022426663.1	protein_coding	14	c.2287+2545delG
13	12809634	TC	T	PASS	intron_variant	MODIFIER	CSMD3	482016	transcript	XM_014118585.2	protein_coding	16	c.2677+2545delG
13	12809654	A	C	GATKstd	intron_variant	MODIFIER	CSMD3	482016	transcript	XM_844967.5	protein_coding	16	c.2677+2526T>G
13	12809654	A	C	GATKstd	intron_variant	MODIFIER	CSMD3	482016	transcript	XM_014118587.2	protein_coding	15	c.2365+2526T>G
13	12809654	A	C	GATKstd	intron_variant	MODIFIER	CSMD3	482016	transcript	XM_022426663.1	protein_coding	14	c.2287+2526T>G
13	12809654	A	C	GATKstd	intron_variant	MODIFIER	CSMD3	482016	transcript	XM_014118585.2	protein_coding	16	c.2677+2526T>G
13	14867828	T	TC	PASS	intergenic_region	MODIFIER	LOC111098482-TRPS1	111098482-482018	intergenic_region	111098482-482018		-1	n.14867828_14867829insC
13	19826544	T	G	GATKstd	upstream_gene_variant	MODIFIER	LOC100686109	100686109	transcript	100686109	pseudogene	-1	n.-3521T>G
13	19826544	T	G	GATKstd	intron_variant	MODIFIER	LOC111098538	111098538	transcript	XR_002632412.1	pseudogene	1	n.95+16349T>G
13	22878036	A	C	PASS	downstream_gene_variant	MODIFIER	LOC111098446	111098446	transcript	XR_002632236.1	pseudogene	-1	n.*4754A>C
13	22878036	A	C	PASS	intergenic_region	MODIFIER	LOC111098446-LOC102156610	111098446-102156610	intergenic_region	111098446-102156610		-1	n.22878036A>C
13	26701057	T	C	GATKstd	intergenic_region	MODIFIER	LOC111098553-LOC100688393	111098553-100688393	intergenic_region	111098553-100688393		-1	n.26701057T>C
13	28793051	C	CTTTTTTTTTTTTTTTTTTTTTAAATTTTTTTTTAATTTTTATTTAT	PASS	intron_variant	MODIFIER	KCNQ3	475103	transcript	XM_532334.4	protein_coding	9	c.1229+7446_1229+7447insATAAATAAAAATTAAAAAAAAATTTAAAAAAAAAAAAAAAAAAAAA
13	28793053	G	T	GATKstd	intron_variant	MODIFIER	KCNQ3	475103	transcript	XM_532334.4	protein_coding	9	c.1229+7445C>A
13	32499956	A	C	GATKstd	intergenic_region	MODIFIER	LOC102154799-LOC100685861	102154799-100685861	intergenic_region	102154799-100685861		-1	n.32499956A>C
13	32872938	A	G	GATKstd	intergenic_region	MODIFIER	LOC102154932-LOC102154983	102154932-102154983	intergenic_region	102154932-102154983		-1	n.32872938A>G
13	33103836	CA	C	PASS	intergenic_region	MODIFIER	LOC111098567-LOC111098568	111098567-111098568	intergenic_region	111098567-111098568		-1	n.33103837delA
13	33314766	G	GT	PASS	downstream_gene_variant	MODIFIER	LOC102155138	102155138	transcript	XR_002632525.1	pseudogene	-1	n.*4900_*4901insT
13	33314766	G	GT	PASS	intergenic_region	MODIFIER	LOC102155138-FAM135B	102155138-482054	intergenic_region	102155138-482054		-1	n.33314766_33314767insT
13	33358003	AAAC	A	PASS	intergenic_region	MODIFIER	LOC102155138-FAM135B	102155138-482054	intergenic_region	102155138-482054		-1	n.33358004_33358006delAAC
13	33472732	C	G	PASS	intron_variant	MODIFIER	FAM135B	482054	transcript	XM_539175.6	protein_coding	6	c.669+9439G>C
13	33472732	C	G	PASS	intron_variant	MODIFIER	FAM135B	482054	transcript	XM_022426737.1	protein_coding	6	c.669+9439G>C
13	33472732	C	G	PASS	intron_variant	MODIFIER	FAM135B	482054	transcript	XM_022426738.1	protein_coding	6	c.669+9439G>C
13	33593465	G	A	GATKstd	intergenic_region	MODIFIER	FAM135B-LOC111098455	482054-111098455	intergenic_region	482054-111098455		-1	n.33593465G>A
13	33817028	T	C	GATKstd	upstream_gene_variant	MODIFIER	LOC111098569	111098569	transcript	XR_002632530.1	pseudogene	-1	n.-3230T>C
13	33817028	T	C	GATKstd	intron_variant	MODIFIER	COL22A1	482056	transcript	XM_005627990.3	protein_coding	40	c.3031-349A>G
13	33817028	T	C	GATKstd	intron_variant	MODIFIER	COL22A1	482056	transcript	XM_022426743.1	protein_coding	35	c.2179-349A>G
13	33817028	T	C	GATKstd	intron_variant	MODIFIER	COL22A1	482056	transcript	XM_022426742.1	protein_coding	40	c.3031-349A>G
13	33817028	T	C	GATKstd	intron_variant	MODIFIER	COL22A1	482056	transcript	XM_014118854.2	protein_coding	40	c.3031-349A>G
13	33817028	T	C	GATKstd	intron_variant	MODIFIER	COL22A1	482056	transcript	XM_022426740.1	protein_coding	39	c.2977-349A>G
13	33817028	T	C	GATKstd	intron_variant	MODIFIER	COL22A1	482056	transcript	XM_022426741.1	protein_coding	38	c.2914-349A>G
13	33817028	T	C	GATKstd	intron_variant	MODIFIER	COL22A1	482056	transcript	XM_539177.6	protein_coding	39	c.3031-349A>G
13	33819877	T	A	GATKstd	upstream_gene_variant	MODIFIER	LOC111098569	111098569	transcript	XR_002632530.1	pseudogene	-1	n.-381T>A
13	33819877	T	A	GATKstd	intron_variant	MODIFIER	COL22A1	482056	transcript	XM_005627990.3	protein_coding	40	c.3031-3198A>T
13	33819877	T	A	GATKstd	intron_variant	MODIFIER	COL22A1	482056	transcript	XM_022426743.1	protein_coding	35	c.2179-3198A>T
13	33819877	T	A	GATKstd	intron_variant	MODIFIER	COL22A1	482056	transcript	XM_022426742.1	protein_coding	40	c.3031-3198A>T
13	33819877	T	A	GATKstd	intron_variant	MODIFIER	COL22A1	482056	transcript	XM_014118854.2	protein_coding	40	c.3031-3198A>T
13	33819877	T	A	GATKstd	intron_variant	MODIFIER	COL22A1	482056	transcript	XM_022426740.1	protein_coding	39	c.2977-3198A>T
13	33819877	T	A	GATKstd	intron_variant	MODIFIER	COL22A1	482056	transcript	XM_022426741.1	protein_coding	38	c.2914-3198A>T
13	33819877	T	A	GATKstd	intron_variant	MODIFIER	COL22A1	482056	transcript	XM_539177.6	protein_coding	39	c.3031-3198A>T
13	33831426	C	G	PASS	intron_variant	MODIFIER	COL22A1	482056	transcript	XM_005627990.3	protein_coding	35	c.2718+250G>C
13	33831426	C	G	PASS	intron_variant	MODIFIER	COL22A1	482056	transcript	XM_022426743.1	protein_coding	30	c.1866+250G>C
13	33831426	C	G	PASS	intron_variant	MODIFIER	COL22A1	482056	transcript	XM_022426742.1	protein_coding	35	c.2718+250G>C
13	33831426	C	G	PASS	intron_variant	MODIFIER	COL22A1	482056	transcript	XM_014118854.2	protein_coding	35	c.2718+250G>C
13	33831426	C	G	PASS	intron_variant	MODIFIER	COL22A1	482056	transcript	XM_022426740.1	protein_coding	34	c.2664+250G>C
13	33831426	C	G	PASS	intron_variant	MODIFIER	COL22A1	482056	transcript	XM_022426741.1	protein_coding	33	c.2601+250G>C
13	33831426	C	G	PASS	intron_variant	MODIFIER	COL22A1	482056	transcript	XM_539177.6	protein_coding	34	c.2718+250G>C
13	33873312	A	G	GATKstd	intron_variant	MODIFIER	COL22A1	482056	transcript	XM_005627990.3	protein_coding	22	c.2050-1254T>C
13	33873312	A	G	GATKstd	intron_variant	MODIFIER	COL22A1	482056	transcript	XM_022426743.1	protein_coding	17	c.1198-1254T>C
13	33873312	A	G	GATKstd	intron_variant	MODIFIER	COL22A1	482056	transcript	XM_022426742.1	protein_coding	22	c.2050-1254T>C
13	33873312	A	G	GATKstd	intron_variant	MODIFIER	COL22A1	482056	transcript	XM_014118854.2	protein_coding	22	c.2050-1254T>C
13	33873312	A	G	GATKstd	intron_variant	MODIFIER	COL22A1	482056	transcript	XM_022426740.1	protein_coding	22	c.2050-1254T>C
13	33873312	A	G	GATKstd	intron_variant	MODIFIER	COL22A1	482056	transcript	XM_022426741.1	protein_coding	22	c.2050-1254T>C
13	33873312	A	G	GATKstd	intron_variant	MODIFIER	COL22A1	482056	transcript	XM_539177.6	protein_coding	21	c.2050-1254T>C
13	33892170	C	A	GATKstd	intron_variant	MODIFIER	COL22A1	482056	transcript	XM_005627990.3	protein_coding	16	c.1777-201G>T
13	33892170	C	A	GATKstd	intron_variant	MODIFIER	COL22A1	482056	transcript	XM_022426743.1	protein_coding	11	c.925-201G>T
13	33892170	C	A	GATKstd	intron_variant	MODIFIER	COL22A1	482056	transcript	XM_022426742.1	protein_coding	16	c.1777-201G>T
13	33892170	C	A	GATKstd	intron_variant	MODIFIER	COL22A1	482056	transcript	XM_014118854.2	protein_coding	16	c.1777-201G>T
13	33892170	C	A	GATKstd	intron_variant	MODIFIER	COL22A1	482056	transcript	XM_022426740.1	protein_coding	16	c.1777-201G>T
13	33892170	C	A	GATKstd	intron_variant	MODIFIER	COL22A1	482056	transcript	XM_022426741.1	protein_coding	16	c.1777-201G>T
13	33892170	C	A	GATKstd	intron_variant	MODIFIER	COL22A1	482056	transcript	XM_539177.6	protein_coding	15	c.1777-201G>T
13	34108315	C	CAGGAAGAGGAACTTTGTTTTTTTTTTTTTTTTTTTTTTTTTTTT	PASS	intergenic_region	MODIFIER	COL22A1-LOC102155574	482056-102155574	intergenic_region	482056-102155574		-1	n.34108315_34108316insAGGAAGAGGAACTTTGTTTTTTTTTTTTTTTTTTTTTTTTTTTT
13	34210395	T	C	PASS	intergenic_region	MODIFIER	COL22A1-LOC102155574	482056-102155574	intergenic_region	482056-102155574		-1	n.34210395T>C
13	34459846	G	A	PASS	downstream_gene_variant	MODIFIER	KCNK9	482057	transcript	XM_022426746.1	protein_coding	-1	c.*13642C>T
13	34459846	G	A	PASS	intergenic_region	MODIFIER	LOC111098571-KCNK9	111098571-482057	intergenic_region	111098571-482057		-1	n.34459846G>A
13	34504877	G	A	PASS	intergenic_region	MODIFIER	KCNK9-LOC106559658	482057-106559658	intergenic_region	482057-106559658		-1	n.34504877G>A
13	34628409	C	T	PASS	downstream_gene_variant	MODIFIER	TRAPPC9	482058	transcript	XM_022426747.1	protein_coding	-1	c.*2645G>A
13	34628409	C	T	PASS	downstream_gene_variant	MODIFIER	TRAPPC9	482058	transcript	XM_022426748.1	protein_coding	-1	c.*2645G>A
13	34628409	C	T	PASS	downstream_gene_variant	MODIFIER	TRAPPC9	482058	transcript	XM_022426749.1	protein_coding	-1	c.*2645G>A
13	34628409	C	T	PASS	intron_variant	MODIFIER	TRAPPC9	482058	transcript	XM_005627991.2	protein_coding	19	c.3029-47740G>A
13	34628409	C	T	PASS	intron_variant	MODIFIER	TRAPPC9	482058	transcript	XM_539179.5	protein_coding	20	c.3056-47740G>A
13	34628409	C	T	PASS	intron_variant	MODIFIER	TRAPPC9	482058	transcript	XM_022426753.1	protein_coding	20	c.3056-30265G>A
13	34903226	A	T	GATKstd	downstream_gene_variant	MODIFIER	LOC111098572	111098572	transcript	XR_002632537.1	pseudogene	-1	n.*405T>A
13	34903226	A	T	GATKstd	intron_variant	MODIFIER	TRAPPC9	482058	transcript	XM_022426747.1	protein_coding	16	c.2556+46325T>A
13	34903226	A	T	GATKstd	intron_variant	MODIFIER	TRAPPC9	482058	transcript	XM_005627991.2	protein_coding	15	c.2529+46325T>A
13	34903226	A	T	GATKstd	intron_variant	MODIFIER	TRAPPC9	482058	transcript	XM_539179.5	protein_coding	16	c.2556+46325T>A
13	34903226	A	T	GATKstd	intron_variant	MODIFIER	TRAPPC9	482058	transcript	XM_022426753.1	protein_coding	16	c.2556+46325T>A
13	34903226	A	T	GATKstd	intron_variant	MODIFIER	TRAPPC9	482058	transcript	XM_022426748.1	protein_coding	15	c.2529+46325T>A
13	34903226	A	T	GATKstd	intron_variant	MODIFIER	TRAPPC9	482058	transcript	XM_022426749.1	protein_coding	15	c.2412+46325T>A
13	34903226	A	T	GATKstd	intron_variant	MODIFIER	TRAPPC9	482058	transcript	XM_022426752.1	protein_coding	16	c.2556+46325T>A
13	34903226	A	T	GATKstd	intron_variant	MODIFIER	TRAPPC9	482058	transcript	XM_022426751.1	protein_coding	16	c.2556+46325T>A
13	34903226	A	T	GATKstd	intron_variant	MODIFIER	TRAPPC9	482058	transcript	XM_022426750.1	protein_coding	16	c.2556+46325T>A
13	34905101	G	A	PASS	intron_variant	MODIFIER	TRAPPC9	482058	transcript	XM_022426747.1	protein_coding	16	c.2556+44450C>T
13	34905101	G	A	PASS	intron_variant	MODIFIER	TRAPPC9	482058	transcript	XM_005627991.2	protein_coding	15	c.2529+44450C>T
13	34905101	G	A	PASS	intron_variant	MODIFIER	TRAPPC9	482058	transcript	XM_539179.5	protein_coding	16	c.2556+44450C>T
13	34905101	G	A	PASS	intron_variant	MODIFIER	TRAPPC9	482058	transcript	XM_022426753.1	protein_coding	16	c.2556+44450C>T
13	34905101	G	A	PASS	intron_variant	MODIFIER	TRAPPC9	482058	transcript	XM_022426748.1	protein_coding	15	c.2529+44450C>T
13	34905101	G	A	PASS	intron_variant	MODIFIER	TRAPPC9	482058	transcript	XM_022426749.1	protein_coding	15	c.2412+44450C>T
13	34905101	G	A	PASS	intron_variant	MODIFIER	TRAPPC9	482058	transcript	XM_022426752.1	protein_coding	16	c.2556+44450C>T
13	34905101	G	A	PASS	intron_variant	MODIFIER	TRAPPC9	482058	transcript	XM_022426751.1	protein_coding	16	c.2556+44450C>T
13	34905101	G	A	PASS	intron_variant	MODIFIER	TRAPPC9	482058	transcript	XM_022426750.1	protein_coding	16	c.2556+44450C>T
13	34905101	G	A	PASS	non_coding_transcript_exon_variant	MODIFIER	LOC111098572	111098572	transcript	XR_002632537.1	pseudogene	1	n.481C>T
13	34923893	G	A	PASS	intron_variant	MODIFIER	TRAPPC9	482058	transcript	XM_022426747.1	protein_coding	16	c.2556+25658C>T
13	34923893	G	A	PASS	intron_variant	MODIFIER	TRAPPC9	482058	transcript	XM_005627991.2	protein_coding	15	c.2529+25658C>T
13	34923893	G	A	PASS	intron_variant	MODIFIER	TRAPPC9	482058	transcript	XM_539179.5	protein_coding	16	c.2556+25658C>T
13	34923893	G	A	PASS	intron_variant	MODIFIER	TRAPPC9	482058	transcript	XM_022426753.1	protein_coding	16	c.2556+25658C>T
13	34923893	G	A	PASS	intron_variant	MODIFIER	TRAPPC9	482058	transcript	XM_022426748.1	protein_coding	15	c.2529+25658C>T
13	34923893	G	A	PASS	intron_variant	MODIFIER	TRAPPC9	482058	transcript	XM_022426749.1	protein_coding	15	c.2412+25658C>T
13	34923893	G	A	PASS	intron_variant	MODIFIER	TRAPPC9	482058	transcript	XM_022426752.1	protein_coding	16	c.2556+25658C>T
13	34923893	G	A	PASS	intron_variant	MODIFIER	TRAPPC9	482058	transcript	XM_022426751.1	protein_coding	16	c.2556+25658C>T
13	34923893	G	A	PASS	intron_variant	MODIFIER	TRAPPC9	482058	transcript	XM_022426750.1	protein_coding	16	c.2556+25658C>T
13	34929801	G	A	GATKstd	intron_variant	MODIFIER	TRAPPC9	482058	transcript	XM_022426747.1	protein_coding	16	c.2556+19750C>T
13	34929801	G	A	GATKstd	intron_variant	MODIFIER	TRAPPC9	482058	transcript	XM_005627991.2	protein_coding	15	c.2529+19750C>T
13	34929801	G	A	GATKstd	intron_variant	MODIFIER	TRAPPC9	482058	transcript	XM_539179.5	protein_coding	16	c.2556+19750C>T
13	34929801	G	A	GATKstd	intron_variant	MODIFIER	TRAPPC9	482058	transcript	XM_022426753.1	protein_coding	16	c.2556+19750C>T
13	34929801	G	A	GATKstd	intron_variant	MODIFIER	TRAPPC9	482058	transcript	XM_022426748.1	protein_coding	15	c.2529+19750C>T
13	34929801	G	A	GATKstd	intron_variant	MODIFIER	TRAPPC9	482058	transcript	XM_022426749.1	protein_coding	15	c.2412+19750C>T
13	34929801	G	A	GATKstd	intron_variant	MODIFIER	TRAPPC9	482058	transcript	XM_022426752.1	protein_coding	16	c.2556+19750C>T
13	34929801	G	A	GATKstd	intron_variant	MODIFIER	TRAPPC9	482058	transcript	XM_022426751.1	protein_coding	16	c.2556+19750C>T
13	34929801	G	A	GATKstd	intron_variant	MODIFIER	TRAPPC9	482058	transcript	XM_022426750.1	protein_coding	16	c.2556+19750C>T
13	34970160	T	C	PASS	intron_variant	MODIFIER	TRAPPC9	482058	transcript	XM_022426747.1	protein_coding	15	c.2431+5508A>G
13	34970160	T	C	PASS	intron_variant	MODIFIER	TRAPPC9	482058	transcript	XM_005627991.2	protein_coding	14	c.2404+5508A>G
13	34970160	T	C	PASS	intron_variant	MODIFIER	TRAPPC9	482058	transcript	XM_539179.5	protein_coding	15	c.2431+5508A>G
13	34970160	T	C	PASS	intron_variant	MODIFIER	TRAPPC9	482058	transcript	XM_022426753.1	protein_coding	15	c.2431+5508A>G
13	34970160	T	C	PASS	intron_variant	MODIFIER	TRAPPC9	482058	transcript	XM_022426748.1	protein_coding	14	c.2404+5508A>G
13	34970160	T	C	PASS	intron_variant	MODIFIER	TRAPPC9	482058	transcript	XM_022426749.1	protein_coding	14	c.2287+5508A>G
13	34970160	T	C	PASS	intron_variant	MODIFIER	TRAPPC9	482058	transcript	XM_022426752.1	protein_coding	15	c.2431+5508A>G
13	34970160	T	C	PASS	intron_variant	MODIFIER	TRAPPC9	482058	transcript	XM_022426751.1	protein_coding	15	c.2431+5508A>G
13	34970160	T	C	PASS	intron_variant	MODIFIER	TRAPPC9	482058	transcript	XM_022426750.1	protein_coding	15	c.2431+5508A>G
13	35162147	CGCGGGGCGCGGGGCGCGG	C	PASS	upstream_gene_variant	MODIFIER	LOC111098574	111098574	transcript	XR_002632540.1	pseudogene	-1	n.-1256_-1239delCCGCGCCCCGCGCCCCGC
13	35162147	CGCGGGGCGCGGGGCGCGG	C	PASS	upstream_gene_variant	MODIFIER	CHRAC1	607681	transcript	XM_022426756.1	protein_coding	-1	c.-135_-118delGCGGGGCGCGGGGCGCGG
13	35162147	CGCGGGGCGCGGGGCGCGG	C	PASS	intergenic_region	MODIFIER	LOC111098574-CHRAC1	111098574-607681	intergenic_region	111098574-607681		-1	n.35162148_35162165delGCGGGGCGCGGGGCGCGG
13	35391593	G	A	PASS	intron_variant	MODIFIER	PTK2	475108	transcript	XM_014118697.2	protein_coding	14	c.1309+2578C>T
13	35391593	G	A	PASS	intron_variant	MODIFIER	PTK2	475108	transcript	XM_022426768.1	protein_coding	5	c.235+2578C>T
13	35391593	G	A	PASS	intron_variant	MODIFIER	PTK2	475108	transcript	XM_022426766.1	protein_coding	12	c.874+2578C>T
13	35391593	G	A	PASS	intron_variant	MODIFIER	PTK2	475108	transcript	XM_014118704.2	protein_coding	11	c.832+2578C>T
13	35391593	G	A	PASS	intron_variant	MODIFIER	PTK2	475108	transcript	XM_005627994.3	protein_coding	14	c.1309+2578C>T
13	35391593	G	A	PASS	intron_variant	MODIFIER	PTK2	475108	transcript	XM_014118700.2	protein_coding	14	c.1309+2578C>T
13	35391593	G	A	PASS	intron_variant	MODIFIER	PTK2	475108	transcript	XM_014118701.2	protein_coding	14	c.1309+2578C>T
13	35391593	G	A	PASS	intron_variant	MODIFIER	PTK2	475108	transcript	XM_014118702.2	protein_coding	14	c.1309+2578C>T
13	35391593	G	A	PASS	intron_variant	MODIFIER	PTK2	475108	transcript	XM_022426757.1	protein_coding	14	c.1309+2578C>T
13	35391593	G	A	PASS	intron_variant	MODIFIER	PTK2	475108	transcript	XM_022426762.1	protein_coding	14	c.1309+2578C>T
13	35391593	G	A	PASS	intron_variant	MODIFIER	PTK2	475108	transcript	XM_022426763.1	protein_coding	15	c.1177+2578C>T
13	35391593	G	A	PASS	intron_variant	MODIFIER	PTK2	475108	transcript	XM_005627993.3	protein_coding	14	c.1309+2578C>T
13	35391593	G	A	PASS	intron_variant	MODIFIER	PTK2	475108	transcript	XM_014118698.2	protein_coding	14	c.1309+2578C>T
13	35391593	G	A	PASS	intron_variant	MODIFIER	PTK2	475108	transcript	XM_014118699.2	protein_coding	14	c.1309+2578C>T
13	35391593	G	A	PASS	intron_variant	MODIFIER	PTK2	475108	transcript	XM_022426758.1	protein_coding	14	c.1309+2578C>T
13	35391593	G	A	PASS	intron_variant	MODIFIER	PTK2	475108	transcript	XM_022426759.1	protein_coding	14	c.1309+2578C>T
13	35391593	G	A	PASS	intron_variant	MODIFIER	PTK2	475108	transcript	XM_022426760.1	protein_coding	14	c.1309+2578C>T
13	35391593	G	A	PASS	intron_variant	MODIFIER	PTK2	475108	transcript	XM_022426764.1	protein_coding	14	c.1309+2578C>T
13	35391593	G	A	PASS	intron_variant	MODIFIER	PTK2	475108	transcript	XM_022426765.1	protein_coding	14	c.1309+2578C>T
13	35391593	G	A	PASS	intron_variant	MODIFIER	PTK2	475108	transcript	XM_014118703.2	protein_coding	13	c.1177+2578C>T
13	35391593	G	A	PASS	intron_variant	MODIFIER	PTK2	475108	transcript	XM_014118705.2	protein_coding	14	c.1309+2578C>T
13	35603400	T	C	PASS	intergenic_region	MODIFIER	LOC106559645-DENND3	106559645-100688774	intergenic_region	106559645-100688774		-1	n.35603400T>C
13	35613128	T	G	PASS	intergenic_region	MODIFIER	LOC106559645-DENND3	106559645-100688774	intergenic_region	106559645-100688774		-1	n.35613128T>G
13	35628676	G	A	PASS	intergenic_region	MODIFIER	LOC106559645-DENND3	106559645-100688774	intergenic_region	106559645-100688774		-1	n.35628676G>A
13	35631023	T	G	GATKstd	intergenic_region	MODIFIER	LOC106559645-DENND3	106559645-100688774	intergenic_region	106559645-100688774		-1	n.35631023T>G
13	35636285	C	T	PASS	intergenic_region	MODIFIER	LOC106559645-DENND3	106559645-100688774	intergenic_region	106559645-100688774		-1	n.35636285C>T
13	35651666	G	A	PASS	intron_variant	MODIFIER	DENND3	100688774	transcript	XM_014118652.1	protein_coding	1	c.121-277G>A
13	35704875	G	A	PASS	3_prime_UTR_variant	MODIFIER	SLC45A4	482060	transcript	XM_539181.6	protein_coding	9	c.*4157C>T
13	35704875	G	A	PASS	downstream_gene_variant	MODIFIER	SLC45A4	482060	transcript	XM_014118708.2	protein_coding	-1	c.*4157C>T
13	35704875	G	A	PASS	downstream_gene_variant	MODIFIER	SLC45A4	482060	transcript	XM_022426772.1	protein_coding	-1	c.*4157C>T
13	35704875	G	A	PASS	downstream_gene_variant	MODIFIER	SLC45A4	482060	transcript	XM_022426775.1	protein_coding	-1	c.*4157C>T
13	35704875	G	A	PASS	downstream_gene_variant	MODIFIER	SLC45A4	482060	transcript	XM_022426774.1	protein_coding	-1	c.*4157C>T
13	35704875	G	A	PASS	downstream_gene_variant	MODIFIER	SLC45A4	482060	transcript	XM_022426776.1	protein_coding	-1	c.*4157C>T
13	35704875	G	A	PASS	downstream_gene_variant	MODIFIER	SLC45A4	482060	transcript	XM_022426771.1	protein_coding	-1	c.*4157C>T
13	35704875	G	A	PASS	downstream_gene_variant	MODIFIER	SLC45A4	482060	transcript	XR_293897.3	pseudogene	-1	n.*4380C>T
13	36035964	C	A	PASS	intergenic_region	MODIFIER	LOC111098456-LOC111098457	111098456-111098457	intergenic_region	111098456-111098457		-1	n.36035964C>A
13	36294048	G	A	GATKstd	upstream_gene_variant	MODIFIER	LOC111098579	111098579	transcript	XR_002632550.1	pseudogene	-1	n.-4096C>T
13	36294048	G	A	GATKstd	intergenic_region	MODIFIER	LOC111098579-LOC111098458	111098579-111098458	intergenic_region	111098579-111098458		-1	n.36294048G>A
13	36691616	G	A	PASS	downstream_gene_variant	MODIFIER	LOC106559636	106559636	transcript	XM_022426507.1	protein_coding	-1	c.*1269G>A
13	36691616	G	A	PASS	intergenic_region	MODIFIER	LOC106559636-LOC475111	106559636-475111	intergenic_region	106559636-475111		-1	n.36691616G>A
13	37441951	G	A	GATKstd	intergenic_region	MODIFIER	LOC111098589-PLEC	111098589-482083	intergenic_region	111098589-482083		-1	n.37441951G>A
13	37581854	G	GCGGGGATCC	PASS	downstream_gene_variant	MODIFIER	GPAA1	475120	transcript	XM_532350.6	protein_coding	-1	c.*1600_*1601insCGGGGATCC
13	37581854	G	GCGGGGATCC	PASS	intergenic_region	MODIFIER	GPAA1-CYC1	475120-475121	intergenic_region	475120-475121		-1	n.37581854_37581855insCGGGGATCC
13	37767570	CCT	C	PASS	intergenic_region	MODIFIER	DGAT1-TMEM249	482093-100685927	intergenic_region	482093-100685927		-1	n.37767571_37767572delCT
13	38543396	T	C	GATKstd	intron_variant	MODIFIER	LIMCH1	475135	transcript	XM_022426925.1	protein_coding	3	c.264+8034T>C
13	38543396	T	C	GATKstd	intron_variant	MODIFIER	LIMCH1	475135	transcript	XM_022426926.1	protein_coding	1	c.96+24624T>C
13	38543396	T	C	GATKstd	intron_variant	MODIFIER	LIMCH1	475135	transcript	XM_022426928.1	protein_coding	3	c.264+8034T>C
13	38543396	T	C	GATKstd	intron_variant	MODIFIER	LIMCH1	475135	transcript	XM_022426930.1	protein_coding	3	c.264+8034T>C
13	38543396	T	C	GATKstd	intron_variant	MODIFIER	LIMCH1	475135	transcript	XM_022426931.1	protein_coding	3	c.264+8034T>C
13	38543396	T	C	GATKstd	intron_variant	MODIFIER	LIMCH1	475135	transcript	XM_022426932.1	protein_coding	3	c.264+8034T>C
13	38543396	T	C	GATKstd	intron_variant	MODIFIER	LIMCH1	475135	transcript	XM_022426934.1	protein_coding	3	c.264+8034T>C
13	39149625	G	A	PASS	intergenic_region	MODIFIER	SLC30A9-BEND4	482117-482119	intergenic_region	482117-482119		-1	n.39149625G>A
13	39746923	A	T	GATKstd	intergenic_region	MODIFIER	LOC111098605-GRXCR1	111098605-100687779	intergenic_region	111098605-100687779		-1	n.39746923A>T
13	39833470	G	A	PASS	downstream_gene_variant	MODIFIER	GRXCR1	100687779	transcript	XR_002632252.1	pseudogene	-1	n.*1049G>A
13	39833470	G	A	PASS	intron_variant	MODIFIER	GRXCR1	100687779	transcript	XM_003431804.3	protein_coding	2	c.627+879G>A
13	39837892	ACTT	A	PASS	intron_variant	MODIFIER	GRXCR1	100687779	transcript	XM_003431804.3	protein_coding	2	c.627+5302_627+5304delCTT
13	39895136	C	T	PASS	intergenic_region	MODIFIER	GRXCR1-LOC102156700	100687779-102156700	intergenic_region	100687779-102156700		-1	n.39895136C>T
13	39896256	G	A	GATKstd	intergenic_region	MODIFIER	GRXCR1-LOC102156700	100687779-102156700	intergenic_region	100687779-102156700		-1	n.39896256G>A
13	39898994	T	C	PASS	intergenic_region	MODIFIER	GRXCR1-LOC102156700	100687779-102156700	intergenic_region	100687779-102156700		-1	n.39898994T>C
13	39914736	A	T	PASS	intergenic_region	MODIFIER	GRXCR1-LOC102156700	100687779-102156700	intergenic_region	100687779-102156700		-1	n.39914736A>T
13	40105429	G	A	PASS	intergenic_region	MODIFIER	LOC102156700-LOC100684895	102156700-100684895	intergenic_region	102156700-100684895		-1	n.40105429G>A
13	40125429	G	T	PASS	intergenic_region	MODIFIER	LOC102156700-LOC100684895	102156700-100684895	intergenic_region	102156700-100684895		-1	n.40125429G>T
13	40151657	C	T	PASS	intergenic_region	MODIFIER	LOC102156700-LOC100684895	102156700-100684895	intergenic_region	102156700-100684895		-1	n.40151657C>T
13	40159116	A	T	PASS	intergenic_region	MODIFIER	LOC102156700-LOC100684895	102156700-100684895	intergenic_region	102156700-100684895		-1	n.40159116A>T
13	40199242	T	C	PASS	intergenic_region	MODIFIER	LOC102156700-LOC100684895	102156700-100684895	intergenic_region	102156700-100684895		-1	n.40199242T>C
13	40241065	G	A	PASS	intergenic_region	MODIFIER	LOC100684895-LOC482124	100684895-482124	intergenic_region	100684895-482124		-1	n.40241065G>A
13	40243696	G	C	PASS	intergenic_region	MODIFIER	LOC100684895-LOC482124	100684895-482124	intergenic_region	100684895-482124		-1	n.40243696G>C
13	40393470	T	C	PASS	intron_variant	MODIFIER	LOC111098463	111098463	transcript	XR_002632255.1	pseudogene	1	n.235-19669T>C
13	40393470	T	C	PASS	intron_variant	MODIFIER	LOC111098462	111098462	transcript	XR_002632254.1	pseudogene	3	n.228+492A>G
13	40476144	C	T	GATKstd	intergenic_region	MODIFIER	LOC111098463-LOC102157179	111098463-102157179	intergenic_region	111098463-102157179		-1	n.40476144C>T
13	40491561	C	T	GATKstd	intergenic_region	MODIFIER	LOC111098463-LOC102157179	111098463-102157179	intergenic_region	111098463-102157179		-1	n.40491561C>T
13	40544206	T	A	GATKstd	intergenic_region	MODIFIER	LOC111098463-LOC102157179	111098463-102157179	intergenic_region	111098463-102157179		-1	n.40544206T>A
13	40551469	G	C	GATKstd	intergenic_region	MODIFIER	LOC111098463-LOC102157179	111098463-102157179	intergenic_region	111098463-102157179		-1	n.40551469G>C
13	40612037	T	C	PASS	intergenic_region	MODIFIER	LOC111098463-LOC102157179	111098463-102157179	intergenic_region	111098463-102157179		-1	n.40612037T>C
13	40649247	A	T	PASS	intergenic_region	MODIFIER	LOC111098463-LOC102157179	111098463-102157179	intergenic_region	111098463-102157179		-1	n.40649247A>T
13	40649349	A	T	GATKstd	intergenic_region	MODIFIER	LOC111098463-LOC102157179	111098463-102157179	intergenic_region	111098463-102157179		-1	n.40649349A>T
13	40877622	G	C	GATKstd	upstream_gene_variant	MODIFIER	LOC111098607	111098607	transcript	XR_002632645.1	pseudogene	-1	n.-149C>G
13	40877622	G	C	GATKstd	intron_variant	MODIFIER	KCTD8	610705	transcript	XM_848248.6	protein_coding	1	c.967+99381C>G
13	41511361	G	A	GATKstd	intron_variant	MODIFIER	LOC111098608	111098608	transcript	XR_002632647.1	pseudogene	4	n.281+177G>A
13	41511361	G	A	GATKstd	intron_variant	MODIFIER	LOC111098608	111098608	transcript	XR_002632648.1	pseudogene	4	n.281+177G>A
13	41511361	G	A	GATKstd	intron_variant	MODIFIER	LOC111098608	111098608	transcript	XR_002632646.1	pseudogene	4	n.281+177G>A
13	41802329	A	G	GATKstd	intergenic_region	MODIFIER	LOC111098466-LOC111098468	111098466-111098468	intergenic_region	111098466-111098468		-1	n.41802329A>G
13	43571489	G	A	GATKstd	intron_variant	MODIFIER	CORIN	482135	transcript	XM_022426523.1	protein_coding	7	c.1267+1046C>T
13	44230853	C	CATT	PASS	intron_variant	MODIFIER	SLAIN2	612977	transcript	XM_005628169.3	protein_coding	7	c.1441+12190_1441+12191insATT
13	44230853	C	CATT	PASS	intron_variant	MODIFIER	SLAIN2	612977	transcript	XM_848566.5	protein_coding	6	c.1364-13265_1364-13264insATT
13	45095400	G	T	PASS	intergenic_region	MODIFIER	SPATA18-LOC102152757	475141-102152757	intergenic_region	475141-102152757		-1	n.45095400G>T
13	45143425	T	C	PASS	intergenic_region	MODIFIER	SPATA18-LOC102152757	475141-102152757	intergenic_region	475141-102152757		-1	n.45143425T>C
13	45303603	C	T	PASS	intergenic_region	MODIFIER	LOC102152757-USP46	102152757-475142	intergenic_region	102152757-475142		-1	n.45303603C>T
13	45306981	G	A	PASS	intergenic_region	MODIFIER	LOC102152757-USP46	102152757-475142	intergenic_region	102152757-475142		-1	n.45306981G>A
13	45718748	GC	G	PASS	intron_variant	MODIFIER	SCFD2	482149	transcript	XM_844602.4	protein_coding	5	c.1559-94000delG
13	45718748	GC	G	PASS	intron_variant	MODIFIER	LOC111098616	111098616	transcript	XR_002632670.1	pseudogene	1	n.133-12562delC
13	45718748	GC	G	PASS	intron_variant	MODIFIER	SCFD2	482149	transcript	XR_002632667.1	pseudogene	5	n.1659-94000delG
13	45718748	GC	G	PASS	intron_variant	MODIFIER	SCFD2	482149	transcript	XR_002632668.1	pseudogene	5	n.1659-94000delG
13	45718748	GC	G	PASS	intron_variant	MODIFIER	SCFD2	482149	transcript	XM_022426987.1	protein_coding	5	c.1559-19396delG
13	46097309	C	T	GATKstd	intron_variant	MODIFIER	LNX1	475143	transcript	XM_005628190.3	protein_coding	7	c.1497+2462G>A
13	46097309	C	T	GATKstd	intron_variant	MODIFIER	LNX1	475143	transcript	XM_532373.6	protein_coding	6	c.1197+2462G>A
13	46097309	C	T	GATKstd	intron_variant	MODIFIER	LNX1	475143	transcript	XM_005628191.3	protein_coding	7	c.1497+2462G>A
13	46097309	C	T	GATKstd	intron_variant	MODIFIER	LNX1	475143	transcript	XM_022426991.1	protein_coding	8	c.1497+2462G>A
13	46097309	C	T	GATKstd	intron_variant	MODIFIER	LNX1	475143	transcript	XM_844614.5	protein_coding	7	c.1497+2462G>A
13	46145744	T	C	GATKstd	intron_variant	MODIFIER	LNX1	475143	transcript	XM_005628190.3	protein_coding	2	c.393-26178A>G
13	46145744	T	C	GATKstd	intron_variant	MODIFIER	LNX1	475143	transcript	XM_532373.6	protein_coding	1	c.93-26178A>G
13	46145744	T	C	GATKstd	intron_variant	MODIFIER	LNX1	475143	transcript	XM_005628191.3	protein_coding	2	c.393-26178A>G
13	46145744	T	C	GATKstd	intron_variant	MODIFIER	LNX1	475143	transcript	XM_022426991.1	protein_coding	3	c.393-26178A>G
13	46145744	T	C	GATKstd	intron_variant	MODIFIER	LNX1	475143	transcript	XM_844614.5	protein_coding	2	c.393-26178A>G
13	46941766	C	T	PASS	intergenic_region	MODIFIER	PDGFRA-KIT	442860-403811	intergenic_region	442860-403811		-1	n.46941766C>T
13	47628320	A	G	PASS	upstream_gene_variant	MODIFIER	LOC111098619	111098619	transcript	XR_002632673.1	pseudogene	-1	n.-1997T>C
13	47628320	A	G	PASS	intron_variant	MODIFIER	SRD5A3	482155	transcript	XM_539274.5	protein_coding	1	c.221+187A>G
13	47772452	C	T	GATKstd	intron_variant	MODIFIER	CLOCK	475145	transcript	XM_005628198.3	protein_coding	2	c.-136-6825G>A
13	47772452	C	T	GATKstd	intron_variant	MODIFIER	CLOCK	475145	transcript	XM_005628200.3	protein_coding	2	c.-136-6825G>A
13	47772452	C	T	GATKstd	intron_variant	MODIFIER	CLOCK	475145	transcript	XM_022426998.1	protein_coding	4	c.-136-6825G>A
13	47772452	C	T	GATKstd	intron_variant	MODIFIER	CLOCK	475145	transcript	XM_005628199.3	protein_coding	3	c.-136-6825G>A
13	47772452	C	T	GATKstd	intron_variant	MODIFIER	CLOCK	475145	transcript	XM_005628202.3	protein_coding	2	c.-136-6825G>A
13	47772452	C	T	GATKstd	intron_variant	MODIFIER	CLOCK	475145	transcript	XM_014118808.2	protein_coding	4	c.-136-6825G>A
13	47772452	C	T	GATKstd	intron_variant	MODIFIER	CLOCK	475145	transcript	XM_014118810.2	protein_coding	4	c.-136-6825G>A
13	47772452	C	T	GATKstd	intron_variant	MODIFIER	CLOCK	475145	transcript	XM_014118811.2	protein_coding	2	c.-136-6825G>A
13	48150116	G	A	PASS	intron_variant	MODIFIER	LOC475149	475149	transcript	XM_005628207.3	protein_coding	11	c.1300-1468G>A
13	48150116	G	A	PASS	intron_variant	MODIFIER	LOC475149	475149	transcript	XM_005628208.3	protein_coding	10	c.1279-1468G>A
13	48150116	G	A	PASS	intron_variant	MODIFIER	LOC475149	475149	transcript	XM_005628209.3	protein_coding	11	c.1300-1468G>A
13	48150116	G	A	PASS	intron_variant	MODIFIER	LOC475149	475149	transcript	XM_005628210.3	protein_coding	10	c.1246-1468G>A
13	48150116	G	A	PASS	intron_variant	MODIFIER	LOC475149	475149	transcript	XM_005628211.3	protein_coding	10	c.1246-1468G>A
13	48150116	G	A	PASS	intron_variant	MODIFIER	LOC475149	475149	transcript	XM_005628212.3	protein_coding	9	c.1225-1468G>A
13	48150116	G	A	PASS	intron_variant	MODIFIER	LOC475149	475149	transcript	XM_532380.6	protein_coding	9	c.1225-1468G>A
13	55925914	A	ATTATATATATATATAT	PASS	intergenic_region	MODIFIER	LOC100684472-LOC111098630	100684472-111098630	intergenic_region	100684472-111098630		-1	n.55925914_55925915insTTATATATATATATAT
13	56452396	CT	C	PASS	intergenic_region	MODIFIER	EPHA5-LOC100684630	100684553-100684630	intergenic_region	100684553-100684630		-1	n.56452397delT
13	58144258	TA	T	PASS	downstream_gene_variant	MODIFIER	UBA6	475160	transcript	XM_532390.6	protein_coding	-1	c.*5002delT
13	58144258	TA	T	PASS	downstream_gene_variant	MODIFIER	UBA6	475160	transcript	XM_005628245.3	protein_coding	-1	c.*5002delT
13	58144258	TA	T	PASS	intron_variant	MODIFIER	STAP1	482171	transcript	XM_022427030.1	protein_coding	9	c.833-4064delA
13	60241756	T	TCACAAAGA	PASS	intergenic_region	MODIFIER	DCK-LOC106559632	482188-106559632	intergenic_region	482188-106559632		-1	n.60241756_60241757insCACAAAGA
13	60544783	C	A	GATKstd	intron_variant	MODIFIER	SLC4A4	475171	transcript	XM_014118843.2	protein_coding	7	c.901-6874C>A
13	61046078	CT	C	PASS	intergenic_region	MODIFIER	LOC611833-NPFFR2	611833-100686684	intergenic_region	611833-100686684		-1	n.61046079delT
13	61590776	G	GA	PASS	intergenic_region	MODIFIER	LOC102152779-LOC111098639	102152779-111098639	intergenic_region	102152779-111098639		-1	n.61590776_61590777insA
13	61618819	T	C	PASS	intron_variant	MODIFIER	LOC111098639	111098639	transcript	XR_002632715.1	pseudogene	2	n.118+8083T>C
13	61691538	G	A	PASS	intron_variant	MODIFIER	LOC111098638	111098638	transcript	XR_002632713.1	pseudogene	2	n.631-6006G>A
13	61691538	G	A	PASS	intron_variant	MODIFIER	LOC111098638	111098638	transcript	XR_002632714.1	pseudogene	2	n.594+10409G>A
13	61693255	C	G	GATKstd	intron_variant	MODIFIER	LOC111098638	111098638	transcript	XR_002632713.1	pseudogene	2	n.631-4289C>G
13	61693255	C	G	GATKstd	intron_variant	MODIFIER	LOC111098638	111098638	transcript	XR_002632714.1	pseudogene	2	n.594+12126C>G
13	61731565	T	TA	PASS	intergenic_region	MODIFIER	LOC111098638-475374	111098638-475374	intergenic_region	111098638-475374		-1	n.61731565_61731566insA
13	61921807	C	T	GATKstd	intron_variant	MODIFIER	ANKRD17	475174	transcript	XM_014118844.2	protein_coding	23	c.4126-229G>A
13	61921807	C	T	GATKstd	intron_variant	MODIFIER	ANKRD17	475174	transcript	XM_014118845.2	protein_coding	23	c.3895-229G>A
13	61921807	C	T	GATKstd	intron_variant	MODIFIER	ANKRD17	475174	transcript	XM_005628282.3	protein_coding	23	c.3946-229G>A
13	61921807	C	T	GATKstd	intron_variant	MODIFIER	ANKRD17	475174	transcript	XM_005628281.3	protein_coding	23	c.4123-229G>A
13	61921807	C	T	GATKstd	intron_variant	MODIFIER	ANKRD17	475174	transcript	XM_005628283.3	protein_coding	22	c.3370-229G>A
13	61921807	C	T	GATKstd	intron_variant	MODIFIER	ANKRD17	475174	transcript	XM_014118847.2	protein_coding	22	c.3373-229G>A
13	61921807	C	T	GATKstd	intron_variant	MODIFIER	ANKRD17	475174	transcript	XM_014118846.2	protein_coding	23	c.4126-229G>A
13	62012703	GAAGT	G	PASS	upstream_gene_variant	MODIFIER	ANKRD17	475174	transcript	XM_005628282.3	protein_coding	-1	c.-303_-300delACTT
13	62012703	GAAGT	G	PASS	intron_variant	MODIFIER	ANKRD17	475174	transcript	XM_014118844.2	protein_coding	1	c.234+33614_234+33617delACTT
13	62012703	GAAGT	G	PASS	intron_variant	MODIFIER	ANKRD17	475174	transcript	XM_005628281.3	protein_coding	1	c.234+33614_234+33617delACTT
13	62012703	GAAGT	G	PASS	intron_variant	MODIFIER	ANKRD17	475174	transcript	XM_005628283.3	protein_coding	1	c.234+33614_234+33617delACTT
13	62012703	GAAGT	G	PASS	intron_variant	MODIFIER	ANKRD17	475174	transcript	XM_014118847.2	protein_coding	1	c.234+33614_234+33617delACTT
13	62012703	GAAGT	G	PASS	intron_variant	MODIFIER	ANKRD17	475174	transcript	XM_014118846.2	protein_coding	1	c.234+33614_234+33617delACTT
13	62705419	G	T	GATKstd	intron_variant	MODIFIER	MTHFD2L	482197	transcript	XM_022427099.1	protein_coding	4	c.278-2759G>T
13	62705419	G	T	GATKstd	intron_variant	MODIFIER	MTHFD2L	482197	transcript	XM_022427101.1	protein_coding	4	c.278-2759G>T
13	62705419	G	T	GATKstd	intron_variant	MODIFIER	MTHFD2L	482197	transcript	XM_022427104.1	protein_coding	3	c.278-2759G>T
13	62705419	G	T	GATKstd	intron_variant	MODIFIER	MTHFD2L	482197	transcript	XM_022427100.1	protein_coding	4	c.278-2759G>T
13	62705419	G	T	GATKstd	intron_variant	MODIFIER	MTHFD2L	482197	transcript	XM_022427103.1	protein_coding	3	c.278-2759G>T
13	62705419	G	T	GATKstd	intron_variant	MODIFIER	MTHFD2L	482197	transcript	XM_022427096.1	protein_coding	3	c.278-2759G>T
13	62705419	G	T	GATKstd	intron_variant	MODIFIER	MTHFD2L	482197	transcript	XM_022427097.1	protein_coding	3	c.278-2759G>T
13	62705419	G	T	GATKstd	intron_variant	MODIFIER	MTHFD2L	482197	transcript	XR_002632717.1	pseudogene	3	n.328-2759G>T
13	62705419	G	T	GATKstd	intron_variant	MODIFIER	MTHFD2L	482197	transcript	XM_022427095.1	protein_coding	3	c.278-2759G>T
13	62705419	G	T	GATKstd	intron_variant	MODIFIER	MTHFD2L	482197	transcript	XM_022427102.1	protein_coding	3	c.278-2759G>T
14	82893	G	A	GATKstd	intergenic_region	MODIFIER	LOC100856521-LOC102151991	100856521-102151991	intergenic_region	100856521-102151991		-1	n.82893G>A
14	7342545	T	TATTATTTTTAAAGATTTATTTATTTATTTATTTATTTATTTATTTATTTATTTATTTATTTATGATA	PASS	upstream_gene_variant	MODIFIER	STRIP2	482261	transcript	XM_843910.4	protein_coding	-1	c.-1067_-1066insTATCATAAATAAATAAATAAATAAATAAATAAATAAATAAATAAATAAATAAATCTTTAAAAATAAT
14	7342545	T	TATTATTTTTAAAGATTTATTTATTTATTTATTTATTTATTTATTTATTTATTTATTTATTTATGATA	PASS	downstream_gene_variant	MODIFIER	AHCYL2	475197	transcript	XM_022427241.1	protein_coding	-1	c.*7725_*7726insTATCATAAATAAATAAATAAATAAATAAATAAATAAATAAATAAATAAATAAATCTTTAAAAATAAT
14	7342545	T	TATTATTTTTAAAGATTTATTTATTTATTTATTTATTTATTTATTTATTTATTTATTTATTTATGATA	PASS	downstream_gene_variant	MODIFIER	AHCYL2	475197	transcript	XM_005628401.3	protein_coding	-1	c.*7725_*7726insTATCATAAATAAATAAATAAATAAATAAATAAATAAATAAATAAATAAATAAATCTTTAAAAATAAT
14	7342545	T	TATTATTTTTAAAGATTTATTTATTTATTTATTTATTTATTTATTTATTTATTTATTTATTTATGATA	PASS	downstream_gene_variant	MODIFIER	AHCYL2	475197	transcript	XM_843933.5	protein_coding	-1	c.*7725_*7726insTATCATAAATAAATAAATAAATAAATAAATAAATAAATAAATAAATAAATAAATCTTTAAAAATAAT
14	7342545	T	TATTATTTTTAAAGATTTATTTATTTATTTATTTATTTATTTATTTATTTATTTATTTATTTATGATA	PASS	downstream_gene_variant	MODIFIER	AHCYL2	475197	transcript	XM_005628402.2	protein_coding	-1	c.*7725_*7726insTATCATAAATAAATAAATAAATAAATAAATAAATAAATAAATAAATAAATAAATCTTTAAAAATAAT
14	7342545	T	TATTATTTTTAAAGATTTATTTATTTATTTATTTATTTATTTATTTATTTATTTATTTATTTATGATA	PASS	downstream_gene_variant	MODIFIER	AHCYL2	475197	transcript	XM_532429.5	protein_coding	-1	c.*7725_*7726insTATCATAAATAAATAAATAAATAAATAAATAAATAAATAAATAAATAAATAAATCTTTAAAAATAAT
14	7342545	T	TATTATTTTTAAAGATTTATTTATTTATTTATTTATTTATTTATTTATTTATTTATTTATTTATGATA	PASS	downstream_gene_variant	MODIFIER	AHCYL2	475197	transcript	XM_005628400.3	protein_coding	-1	c.*7725_*7726insTATCATAAATAAATAAATAAATAAATAAATAAATAAATAAATAAATAAATAAATCTTTAAAAATAAT
14	7342545	T	TATTATTTTTAAAGATTTATTTATTTATTTATTTATTTATTTATTTATTTATTTATTTATTTATGATA	PASS	intergenic_region	MODIFIER	STRIP2-AHCYL2	482261-475197	intergenic_region	482261-475197		-1	n.7342545_7342546insATTATTTTTAAAGATTTATTTATTTATTTATTTATTTATTTATTTATTTATTTATTTATTTATGATA
14	15342479	C	A	PASS	intergenic_region	MODIFIER	ZNF804B-LOC111098653	482288-111098653	intergenic_region	482288-111098653		-1	n.15342479C>A
14	15820246	T	TAA	PASS	intergenic_region	MODIFIER	LOC106559683-LOC111098743	106559683-111098743	intergenic_region	106559683-111098743		-1	n.15820246_15820247insAA
14	16303294	G	A	GATKstd	intron_variant	MODIFIER	CDK14	475223	transcript	XM_014118945.2	protein_coding	2	c.-48+15935G>A
14	16303294	G	A	GATKstd	intron_variant	MODIFIER	CDK14	475223	transcript	XM_022427325.1	protein_coding	2	c.-109+15935G>A
14	17308894	A	G	GATKstd	intergenic_region	MODIFIER	LOC102155309-MTERF1	102155309-100684053	intergenic_region	102155309-100684053		-1	n.17308894A>G
14	17631831	T	G	PASS	intron_variant	MODIFIER	AKAP9	475224	transcript	XM_014118969.2	protein_coding	7	c.1140+2152T>G
14	17631831	T	G	PASS	intron_variant	MODIFIER	AKAP9	475224	transcript	XM_014118970.2	protein_coding	8	c.903+2152T>G
14	17631831	T	G	PASS	intron_variant	MODIFIER	AKAP9	475224	transcript	XM_014118972.2	protein_coding	7	c.1140+2152T>G
14	17631831	T	G	PASS	intron_variant	MODIFIER	AKAP9	475224	transcript	XM_014118973.2	protein_coding	7	c.1140+2152T>G
14	17631831	T	G	PASS	intron_variant	MODIFIER	AKAP9	475224	transcript	XM_014118974.2	protein_coding	7	c.1140+2152T>G
14	17631831	T	G	PASS	intron_variant	MODIFIER	AKAP9	475224	transcript	XM_014118976.2	protein_coding	7	c.1140+2152T>G
14	17631831	T	G	PASS	intron_variant	MODIFIER	AKAP9	475224	transcript	XM_014118977.2	protein_coding	7	c.1140+2152T>G
14	17631831	T	G	PASS	intron_variant	MODIFIER	AKAP9	475224	transcript	XM_014118978.2	protein_coding	7	c.1140+2152T>G
14	19287079	G	T	GATKstd	intron_variant	MODIFIER	GNGT1	403895	transcript	XM_022427126.1	protein_coding	2	c.-402-9673G>T
14	19287079	G	T	GATKstd	intron_variant	MODIFIER	GNGT1	403895	transcript	XM_022427127.1	protein_coding	2	c.-298-28931G>T
14	19287079	G	T	GATKstd	intron_variant	MODIFIER	GNGT1	403895	transcript	XM_022427128.1	protein_coding	2	c.-402-9673G>T
14	22140383	ATATATATATAC	A	PASS	intergenic_region	MODIFIER	DLX6-SDHAF3	482312-610248	intergenic_region	482312-610248		-1	n.22140384_22140394delTATATATATAC
14	22304819	A	AT	PASS	intron_variant	MODIFIER	LOC102153209	102153209	transcript	XM_022427158.1	protein_coding	3	c.547-12938_547-12937insT
14	23063909	A	C	GATKstd	intron_variant	MODIFIER	COL28A1	482315	transcript	XM_005628540.3	protein_coding	25	c.1998+1506T>G
14	23772432	C	CTTTTTTTTTTTTTTTTTTTTTTTT,CTTTTTTTTTTTTTTTTTTTTTTT	PASS	intron_variant	MODIFIER	ICA1	475242	transcript	XM_022427397.1	protein_coding	6	c.678+6411_678+6412insAAAAAAAAAAAAAAAAAAAAAAA
14	23772432	C	CTTTTTTTTTTTTTTTTTTTTTTTT,CTTTTTTTTTTTTTTTTTTTTTTT	PASS	intron_variant	MODIFIER	ICA1	475242	transcript	XM_022427397.1	protein_coding	6	c.678+6411_678+6412insAAAAAAAAAAAAAAAAAAAAAAAA
14	23772432	C	CTTTTTTTTTTTTTTTTTTTTTTTT,CTTTTTTTTTTTTTTTTTTTTTTT	PASS	intron_variant	MODIFIER	ICA1	475242	transcript	XM_022427409.1	protein_coding	5	c.576+6411_576+6412insAAAAAAAAAAAAAAAAAAAAAAA
14	23772432	C	CTTTTTTTTTTTTTTTTTTTTTTTT,CTTTTTTTTTTTTTTTTTTTTTTT	PASS	intron_variant	MODIFIER	ICA1	475242	transcript	XM_022427409.1	protein_coding	5	c.576+6411_576+6412insAAAAAAAAAAAAAAAAAAAAAAAA
14	23772432	C	CTTTTTTTTTTTTTTTTTTTTTTTT,CTTTTTTTTTTTTTTTTTTTTTTT	PASS	intron_variant	MODIFIER	ICA1	475242	transcript	XM_005628550.3	protein_coding	7	c.579+6411_579+6412insAAAAAAAAAAAAAAAAAAAAAAA
14	23772432	C	CTTTTTTTTTTTTTTTTTTTTTTTT,CTTTTTTTTTTTTTTTTTTTTTTT	PASS	intron_variant	MODIFIER	ICA1	475242	transcript	XM_005628550.3	protein_coding	7	c.579+6411_579+6412insAAAAAAAAAAAAAAAAAAAAAAAA
14	23772432	C	CTTTTTTTTTTTTTTTTTTTTTTTT,CTTTTTTTTTTTTTTTTTTTTTTT	PASS	intron_variant	MODIFIER	ICA1	475242	transcript	XM_022427400.1	protein_coding	7	c.579+6411_579+6412insAAAAAAAAAAAAAAAAAAAAAAA
14	23772432	C	CTTTTTTTTTTTTTTTTTTTTTTTT,CTTTTTTTTTTTTTTTTTTTTTTT	PASS	intron_variant	MODIFIER	ICA1	475242	transcript	XM_022427400.1	protein_coding	7	c.579+6411_579+6412insAAAAAAAAAAAAAAAAAAAAAAAA
14	23772432	C	CTTTTTTTTTTTTTTTTTTTTTTTT,CTTTTTTTTTTTTTTTTTTTTTTT	PASS	intron_variant	MODIFIER	ICA1	475242	transcript	XM_005628554.3	protein_coding	6	c.579+6411_579+6412insAAAAAAAAAAAAAAAAAAAAAAA
14	23772432	C	CTTTTTTTTTTTTTTTTTTTTTTTT,CTTTTTTTTTTTTTTTTTTTTTTT	PASS	intron_variant	MODIFIER	ICA1	475242	transcript	XM_005628554.3	protein_coding	6	c.579+6411_579+6412insAAAAAAAAAAAAAAAAAAAAAAAA
14	23772432	C	CTTTTTTTTTTTTTTTTTTTTTTTT,CTTTTTTTTTTTTTTTTTTTTTTT	PASS	intron_variant	MODIFIER	ICA1	475242	transcript	XM_014119113.2	protein_coding	6	c.579+6411_579+6412insAAAAAAAAAAAAAAAAAAAAAAA
14	23772432	C	CTTTTTTTTTTTTTTTTTTTTTTTT,CTTTTTTTTTTTTTTTTTTTTTTT	PASS	intron_variant	MODIFIER	ICA1	475242	transcript	XM_014119113.2	protein_coding	6	c.579+6411_579+6412insAAAAAAAAAAAAAAAAAAAAAAAA
14	23772432	C	CTTTTTTTTTTTTTTTTTTTTTTTT,CTTTTTTTTTTTTTTTTTTTTTTT	PASS	intron_variant	MODIFIER	ICA1	475242	transcript	XM_014119114.2	protein_coding	6	c.579+6411_579+6412insAAAAAAAAAAAAAAAAAAAAAAA
14	23772432	C	CTTTTTTTTTTTTTTTTTTTTTTTT,CTTTTTTTTTTTTTTTTTTTTTTT	PASS	intron_variant	MODIFIER	ICA1	475242	transcript	XM_014119114.2	protein_coding	6	c.579+6411_579+6412insAAAAAAAAAAAAAAAAAAAAAAAA
14	23772432	C	CTTTTTTTTTTTTTTTTTTTTTTTT,CTTTTTTTTTTTTTTTTTTTTTTT	PASS	intron_variant	MODIFIER	ICA1	475242	transcript	XM_014119115.2	protein_coding	6	c.579+6411_579+6412insAAAAAAAAAAAAAAAAAAAAAAA
14	23772432	C	CTTTTTTTTTTTTTTTTTTTTTTTT,CTTTTTTTTTTTTTTTTTTTTTTT	PASS	intron_variant	MODIFIER	ICA1	475242	transcript	XM_014119115.2	protein_coding	6	c.579+6411_579+6412insAAAAAAAAAAAAAAAAAAAAAAAA
14	23772432	C	CTTTTTTTTTTTTTTTTTTTTTTTT,CTTTTTTTTTTTTTTTTTTTTTTT	PASS	intron_variant	MODIFIER	ICA1	475242	transcript	XM_005628551.3	protein_coding	6	c.579+6411_579+6412insAAAAAAAAAAAAAAAAAAAAAAA
14	23772432	C	CTTTTTTTTTTTTTTTTTTTTTTTT,CTTTTTTTTTTTTTTTTTTTTTTT	PASS	intron_variant	MODIFIER	ICA1	475242	transcript	XM_005628551.3	protein_coding	6	c.579+6411_579+6412insAAAAAAAAAAAAAAAAAAAAAAAA
14	23772432	C	CTTTTTTTTTTTTTTTTTTTTTTTT,CTTTTTTTTTTTTTTTTTTTTTTT	PASS	intron_variant	MODIFIER	ICA1	475242	transcript	XM_022427405.1	protein_coding	6	c.576+6411_576+6412insAAAAAAAAAAAAAAAAAAAAAAA
14	23772432	C	CTTTTTTTTTTTTTTTTTTTTTTTT,CTTTTTTTTTTTTTTTTTTTTTTT	PASS	intron_variant	MODIFIER	ICA1	475242	transcript	XM_022427405.1	protein_coding	6	c.576+6411_576+6412insAAAAAAAAAAAAAAAAAAAAAAAA
14	23772432	C	CTTTTTTTTTTTTTTTTTTTTTTTT,CTTTTTTTTTTTTTTTTTTTTTTT	PASS	intron_variant	MODIFIER	ICA1	475242	transcript	XM_005628549.3	protein_coding	7	c.579+6411_579+6412insAAAAAAAAAAAAAAAAAAAAAAA
14	23772432	C	CTTTTTTTTTTTTTTTTTTTTTTTT,CTTTTTTTTTTTTTTTTTTTTTTT	PASS	intron_variant	MODIFIER	ICA1	475242	transcript	XM_005628549.3	protein_coding	7	c.579+6411_579+6412insAAAAAAAAAAAAAAAAAAAAAAAA
14	23772432	C	CTTTTTTTTTTTTTTTTTTTTTTTT,CTTTTTTTTTTTTTTTTTTTTTTT	PASS	intron_variant	MODIFIER	ICA1	475242	transcript	XM_022427399.1	protein_coding	7	c.579+6411_579+6412insAAAAAAAAAAAAAAAAAAAAAAA
14	23772432	C	CTTTTTTTTTTTTTTTTTTTTTTTT,CTTTTTTTTTTTTTTTTTTTTTTT	PASS	intron_variant	MODIFIER	ICA1	475242	transcript	XM_022427399.1	protein_coding	7	c.579+6411_579+6412insAAAAAAAAAAAAAAAAAAAAAAAA
14	23772432	C	CTTTTTTTTTTTTTTTTTTTTTTTT,CTTTTTTTTTTTTTTTTTTTTTTT	PASS	intron_variant	MODIFIER	ICA1	475242	transcript	XM_022427401.1	protein_coding	7	c.579+6411_579+6412insAAAAAAAAAAAAAAAAAAAAAAA
14	23772432	C	CTTTTTTTTTTTTTTTTTTTTTTTT,CTTTTTTTTTTTTTTTTTTTTTTT	PASS	intron_variant	MODIFIER	ICA1	475242	transcript	XM_022427401.1	protein_coding	7	c.579+6411_579+6412insAAAAAAAAAAAAAAAAAAAAAAAA
14	23772432	C	CTTTTTTTTTTTTTTTTTTTTTTTT,CTTTTTTTTTTTTTTTTTTTTTTT	PASS	intron_variant	MODIFIER	ICA1	475242	transcript	XM_005628552.3	protein_coding	6	c.579+6411_579+6412insAAAAAAAAAAAAAAAAAAAAAAA
14	23772432	C	CTTTTTTTTTTTTTTTTTTTTTTTT,CTTTTTTTTTTTTTTTTTTTTTTT	PASS	intron_variant	MODIFIER	ICA1	475242	transcript	XM_005628552.3	protein_coding	6	c.579+6411_579+6412insAAAAAAAAAAAAAAAAAAAAAAAA
[truncated: 7,616 more rows]
